# Supplementary material for: Mechanical instability and interfacial energy drive biofilm morphogenesis
Source: eLife. 2019 Mar 8;8:e43920. doi: 10.7554/eLife.43920 (PMC6453567; doi:10.7554/eLife.43920)
Supplement: Figure 1—figure supplement 1—source data 1. [file elife-43920-fig1-figsupp1-data1.xlsx]

## Sheet: Figure 2 - figure supplement 1
		Figure 1 - figure supplement 1 A			Figure 1 - figure supplement 1 B
Description		See Table 3 for the data.			Data extracted using customized Matlab code. The raw data are represented as (θ, I) for intensity profile and (ΔIp, P(ΔIp)) for peak distribution. See main text for the depository of the code and figure legend for more details.
Condition
Computed/Measured quantity					Agar conc. = 0.4%				Agar conc. = 0.7%				Agar conc. = 1.0%
					θ (rad)	I	ΔIp	P(ΔIp)	θ (rad)	I	ΔIp	P(ΔIp)	θ (rad)	I	ΔIp	P(ΔIp)
					1.5708	0.497491	0.03	0.28125	1.5708	0.682342	0.03	0.0322581	1.5708	0.591465	0.07	0.0243902
					1.57237	0.497491	0.05	0.1875	1.57237	0.663388	0.05	0.0806452	1.57237	0.624944	0.09	0.097561
					1.57394	0.509336	0.07	0.03125	1.57394	0.653911	0.07	0.145161	1.57394	0.624944	0.11	0.0731707
					1.57551	0.521181	0.09	0.015625	1.57551	0.597049	0.09	0.145161	1.57551	0.669583	0.13	0.146341
					1.57708	0.533026	0.11	0.0625	1.57708	0.568618	0.11	0.112903	1.57708	0.669583	0.15	0.0731707
					1.57865	0.521181	0.13	0.0625	1.57865	0.540187	0.13	0.0322581	1.57865	0.647263	0.17	0.121951
					1.58023	0.533026	0.15	0.046875	1.58023	0.454894	0.15	0.0322581	1.58023	0.658423	0.19	0.097561
					1.5818	0.533026	0.17	0.09375	1.5818	0.454894	0.17	0.016129	1.5818	0.669583	0.21	0.146341
					1.58337	0.521181	0.19	0.015625	1.58337	0.426463	0.19	0.0322581	1.58337	0.680742	0.23	0.0487805
					1.58494	0.568561	0.21	0.015625	1.58494	0.43594	0.21	0.0645161	1.58494	0.669583	0.25	0.121951
					1.58651	0.615941	0.23	0.03125	1.58651	0.416987	0.23	0.0322581	1.58651	0.658423	0.27	0.0243902
					1.58808	0.604096	0.25	0	1.58808	0.43594	0.25	0.0645161	1.58808	0.658423	0.29	0.0243902
					1.58966	0.615941	0.27	0.015625	1.58966	0.445417	0.27	0.0967742	1.58966	0.669583
					1.59123	0.615941	0.29	0	1.59123	0.426463	0.29	0.0322581	1.59123	0.658423
					1.5928	0.651477	0.31	0.015625	1.5928	0.43594	0.31	0.0645161	1.5928	0.669583
					1.59437	0.651477	0.33	0	1.59437	0.464371	0.33	0.016129	1.59437	0.658423
					1.59594	0.651477	0.35	0.015625	1.59594	0.492802			1.59594	0.647263
					1.59751	0.639631	0.37	0.015625	1.59751	0.568618			1.59751	0.647263
					1.59908	0.663322	0.39	0	1.59908	0.597049			1.59908	0.658423
					1.60066	0.639631	0.41	0.078125	1.60066	0.653911			1.60066	0.658423
					1.60223	0.663322	0.43	0	1.60223	0.663388			1.60223	0.669583
					1.6038	0.663322	0.45	0	1.6038	0.691819			1.6038	0.669583
					1.60537	0.675167	0.47	0	1.60537	0.682342			1.60537	0.680742
					1.60694	0.615941	0.49	0.015625	1.60694	0.701296			1.60694	0.669583
					1.60851	0.592251			1.60851	0.691819			1.60851	0.680742
					1.61009	0.580406			1.61009	0.691819			1.61009	0.691902
					1.61166	0.521181			1.61166	0.701296			1.61166	0.680742
					1.61323	0.521181			1.61323	0.691819			1.61323	0.680742
					1.6148	0.521181			1.6148	0.701296			1.6148	0.680742
					1.61637	0.473801			1.61637	0.691819			1.61637	0.669583
					1.61794	0.485646			1.61794	0.691819			1.61794	0.658423
					1.61952	0.473801			1.61952	0.691819			1.61952	0.680742
					1.62109	0.509336			1.62109	0.663388			1.62109	0.658423
					1.62266	0.544871			1.62266	0.682342			1.62266	0.658423
					1.62423	0.568561			1.62423	0.653911			1.62423	0.613784
					1.6258	0.604096			1.6258	0.663388			1.6258	0.591465
					1.62737	0.639631			1.62737	0.663388			1.62737	0.557986
					1.62894	0.687012			1.62894	0.663388			1.62894	0.546826
					1.63052	0.710702			1.63052	0.663388			1.63052	0.524506
					1.63209	0.710702			1.63209	0.644434			1.63209	0.524506
					1.63366	0.722547			1.63366	0.653911			1.63366	0.524506
					1.63523	0.722547			1.63523	0.644434			1.63523	0.524506
					1.6368	0.722547			1.6368	0.634957			1.6368	0.524506
					1.63837	0.758082			1.63837	0.634957			1.63837	0.513347
					1.63995	0.687012			1.63995	0.644434			1.63995	0.513347
					1.64152	0.722547			1.64152	0.62548			1.64152	0.513347
					1.64309	0.722547			1.64309	0.634957			1.64309	0.513347
					1.64466	0.734392			1.64466	0.644434			1.64466	0.513347
					1.64623	0.722547			1.64623	0.62548			1.64623	0.502187
					1.6478	0.710702			1.6478	0.606526			1.6478	0.513347
					1.64938	0.687012			1.64938	0.606526			1.64938	0.491027
					1.65095	0.675167			1.65095	0.634957			1.65095	0.513347
					1.65252	0.687012			1.65252	0.616003			1.65252	0.535666
					1.65409	0.687012			1.65409	0.62548			1.65409	0.535666
					1.65566	0.687012			1.65566	0.653911			1.65566	0.535666
					1.65723	0.687012			1.65723	0.653911			1.65723	0.535666
					1.6588	0.675167			1.6588	0.653911			1.6588	0.524506
					1.66038	0.698857			1.66038	0.682342			1.66038	0.535666
					1.66195	0.687012			1.66195	0.682342			1.66195	0.524506
					1.66352	0.687012			1.66352	0.682342			1.66352	0.535666
					1.66509	0.710702			1.66509	0.672865			1.66509	0.546826
					1.66666	0.710702			1.66666	0.682342			1.66666	0.580305
					1.66823	0.687012			1.66823	0.682342			1.66823	0.613784
					1.66981	0.675167			1.66981	0.672865			1.66981	0.602624
					1.67138	0.675167			1.67138	0.663388			1.67138	0.669583
					1.67295	0.698857			1.67295	0.682342			1.67295	0.669583
					1.67452	0.675167			1.67452	0.701296			1.67452	0.714221
					1.67609	0.687012			1.67609	0.682342			1.67609	0.714221
					1.67766	0.675167			1.67766	0.682342			1.67766	0.703062
					1.67924	0.698857			1.67924	0.672865			1.67924	0.736541
					1.68081	0.698857			1.68081	0.672865			1.68081	0.725381
					1.68238	0.687012			1.68238	0.672865			1.68238	0.703062
					1.68395	0.675167			1.68395	0.663388			1.68395	0.647263
					1.68552	0.687012			1.68552	0.653911			1.68552	0.602624
					1.68709	0.687012			1.68709	0.644434			1.68709	0.569145
					1.68866	0.710702			1.68866	0.644434			1.68866	0.546826
					1.69024	0.675167			1.69024	0.644434			1.69024	0.502187
					1.69181	0.687012			1.69181	0.597049			1.69181	0.502187
					1.69338	0.687012			1.69338	0.634957			1.69338	0.468708
					1.69495	0.675167			1.69495	0.634957			1.69495	0.446388
					1.69652	0.663322			1.69652	0.616003			1.69652	0.457548
					1.69809	0.675167			1.69809	0.616003			1.69809	0.457548
					1.69967	0.651477			1.69967	0.634957			1.69967	0.479868
					1.70124	0.651477			1.70124	0.62548			1.70124	0.457548
					1.70281	0.675167			1.70281	0.663388			1.70281	0.479868
					1.70438	0.651477			1.70438	0.644434			1.70438	0.502187
					1.70595	0.663322			1.70595	0.653911			1.70595	0.468708
					1.70752	0.663322			1.70752	0.653911			1.70752	0.468708
					1.7091	0.663322			1.7091	0.653911			1.7091	0.457548
					1.71067	0.663322			1.71067	0.672865			1.71067	0.491027
					1.71224	0.663322			1.71224	0.682342			1.71224	0.468708
					1.71381	0.675167			1.71381	0.653911			1.71381	0.502187
					1.71538	0.675167			1.71538	0.672865			1.71538	0.457548
					1.71695	0.675167			1.71695	0.663388			1.71695	0.491027
					1.71853	0.663322			1.71853	0.672865			1.71853	0.491027
					1.7201	0.675167			1.7201	0.682342			1.7201	0.502187
					1.72167	0.675167			1.72167	0.682342			1.72167	0.491027
					1.72324	0.675167			1.72324	0.682342			1.72324	0.513347
					1.72481	0.675167			1.72481	0.682342			1.72481	0.502187
					1.72638	0.675167			1.72638	0.682342			1.72638	0.569145
					1.72795	0.687012			1.72795	0.663388			1.72795	0.636104
					1.72953	0.639631			1.72953	0.672865			1.72953	0.624944
					1.7311	0.663322			1.7311	0.663388			1.7311	0.636104
					1.73267	0.604096			1.73267	0.653911			1.73267	0.669583
					1.73424	0.580406			1.73424	0.663388			1.73424	0.703062
					1.73581	0.497491			1.73581	0.653911			1.73581	0.736541
					1.73738	0.544871			1.73738	0.644434			1.73738	0.725381
					1.73896	0.438266			1.73896	0.634957			1.73896	0.714221
					1.74053	0.438266			1.74053	0.634957			1.74053	0.703062
					1.7421	0.426421			1.7421	0.634957			1.7421	0.714221
					1.74367	0.450111			1.74367	0.62548			1.74367	0.736541
					1.74524	0.461956			1.74524	0.606526			1.74524	0.736541
					1.74681	0.497491			1.74681	0.62548			1.74681	0.725381
					1.74839	0.556716			1.74839	0.62548			1.74839	0.680742
					1.74996	0.568561			1.74996	0.597049			1.74996	0.669583
					1.75153	0.509336			1.75153	0.62548			1.75153	0.669583
					1.7531	0.367196			1.7531	0.62548			1.7531	0.669583
					1.75467	0.331661			1.75467	0.62548			1.75467	0.658423
					1.75624	0.319816			1.75624	0.644434			1.75624	0.647263
					1.75781	0.307971			1.75781	0.672865			1.75781	0.647263
					1.75939	0.319816			1.75939	0.644434			1.75939	0.669583
					1.76096	0.284281			1.76096	0.644434			1.76096	0.669583
					1.76253	0.331661			1.76253	0.653911			1.76253	0.647263
					1.7641	0.355351			1.7641	0.672865			1.7641	0.636104
					1.76567	0.379041			1.76567	0.672865			1.76567	0.613784
					1.76724	0.426421			1.76724	0.682342			1.76724	0.602624
					1.76882	0.497491			1.76882	0.710772			1.76882	0.591465
					1.77039	0.544871			1.77039	0.720249			1.77039	0.613784
					1.77196	0.592251			1.77196	0.710772			1.77196	0.569145
					1.77353	0.604096			1.77353	0.729726			1.77353	0.580305
					1.7751	0.604096			1.7751	0.720249			1.7751	0.569145
					1.77667	0.651477			1.77667	0.720249			1.77667	0.580305
					1.77825	0.675167			1.77825	0.701296			1.77825	0.535666
					1.77982	0.639631			1.77982	0.720249			1.77982	0.546826
					1.78139	0.663322			1.78139	0.672865			1.78139	0.557986
					1.78296	0.675167			1.78296	0.634957			1.78296	0.546826
					1.78453	0.663322			1.78453	0.606526			1.78453	0.535666
					1.7861	0.687012			1.7861	0.540187			1.7861	0.535666
					1.78767	0.675167			1.78767	0.473848			1.78767	0.546826
					1.78925	0.687012			1.78925	0.473848			1.78925	0.513347
					1.79082	0.687012			1.79082	0.473848			1.79082	0.524506
					1.79239	0.698857			1.79239	0.473848			1.79239	0.524506
					1.79396	0.698857			1.79396	0.454894			1.79396	0.524506
					1.79553	0.675167			1.79553	0.43594			1.79553	0.513347
					1.7971	0.663322			1.7971	0.43594			1.7971	0.524506
					1.79868	0.687012			1.79868	0.454894			1.79868	0.546826
					1.80025	0.663322			1.80025	0.43594			1.80025	0.535666
					1.80182	0.675167			1.80182	0.454894			1.80182	0.546826
					1.80339	0.675167			1.80339	0.464371			1.80339	0.524506
					1.80496	0.663322			1.80496	0.502279			1.80496	0.535666
					1.80653	0.698857			1.80653	0.587572			1.80653	0.535666
					1.80811	0.663322			1.80811	0.62548			1.80811	0.557986
					1.80968	0.675167			1.80968	0.691819			1.80968	0.557986
					1.81125	0.687012			1.81125	0.672865			1.81125	0.557986
					1.81282	0.687012			1.81282	0.682342			1.81282	0.569145
					1.81439	0.675167			1.81439	0.691819			1.81439	0.580305
					1.81596	0.675167			1.81596	0.701296			1.81596	0.591465
					1.81753	0.675167			1.81753	0.701296			1.81753	0.591465
					1.81911	0.675167			1.81911	0.720249			1.81911	0.636104
					1.82068	0.675167			1.82068	0.691819			1.82068	0.658423
					1.82225	0.698857			1.82225	0.682342			1.82225	0.658423
					1.82382	0.687012			1.82382	0.682342			1.82382	0.691902
					1.82539	0.675167			1.82539	0.663388			1.82539	0.725381
					1.82696	0.663322			1.82696	0.653911			1.82696	0.725381
					1.82854	0.651477			1.82854	0.644434			1.82854	0.736541
					1.83011	0.698857			1.83011	0.672865			1.83011	0.747701
					1.83168	0.651477			1.83168	0.653911			1.83168	0.725381
					1.83325	0.651477			1.83325	0.672865			1.83325	0.703062
					1.83482	0.687012			1.83482	0.653911			1.83482	0.714221
					1.83639	0.651477			1.83639	0.644434			1.83639	0.691902
					1.83797	0.639631			1.83797	0.62548			1.83797	0.647263
					1.83954	0.687012			1.83954	0.62548			1.83954	0.624944
					1.84111	0.675167			1.84111	0.587572			1.84111	0.580305
					1.84268	0.675167			1.84268	0.597049			1.84268	0.546826
					1.84425	0.675167			1.84425	0.587572			1.84425	0.524506
					1.84582	0.675167			1.84582	0.578095			1.84582	0.513347
					1.84739	0.675167			1.84739	0.634957			1.84739	0.513347
					1.84897	0.675167			1.84897	0.62548			1.84897	0.502187
					1.85054	0.675167			1.85054	0.597049			1.85054	0.502187
					1.85211	0.663322			1.85211	0.616003			1.85211	0.502187
					1.85368	0.639631			1.85368	0.62548			1.85368	0.479868
					1.85525	0.675167			1.85525	0.606526			1.85525	0.479868
					1.85682	0.687012			1.85682	0.62548			1.85682	0.502187
					1.8584	0.675167			1.8584	0.653911			1.8584	0.502187
					1.85997	0.698857			1.85997	0.653911			1.85997	0.502187
					1.86154	0.663322			1.86154	0.653911			1.86154	0.479868
					1.86311	0.687012			1.86311	0.672865			1.86311	0.491027
					1.86468	0.663322			1.86468	0.682342			1.86468	0.468708
					1.86625	0.663322			1.86625	0.691819			1.86625	0.491027
					1.86783	0.627786			1.86783	0.710772			1.86783	0.513347
					1.8694	0.639631			1.8694	0.691819			1.8694	0.524506
					1.87097	0.651477			1.87097	0.710772			1.87097	0.513347
					1.87254	0.663322			1.87254	0.701296			1.87254	0.491027
					1.87411	0.639631			1.87411	0.682342			1.87411	0.502187
					1.87568	0.663322			1.87568	0.682342			1.87568	0.513347
					1.87725	0.627786			1.87725	0.672865			1.87725	0.524506
					1.87883	0.568561			1.87883	0.682342			1.87883	0.535666
					1.8804	0.604096			1.8804	0.653911			1.8804	0.557986
					1.88197	0.592251			1.88197	0.644434			1.88197	0.580305
					1.88354	0.568561			1.88354	0.653911			1.88354	0.602624
					1.88511	0.509336			1.88511	0.62548			1.88511	0.624944
					1.88668	0.544871			1.88668	0.62548			1.88668	0.636104
					1.88826	0.533026			1.88826	0.644434			1.88826	0.680742
					1.88983	0.485646			1.88983	0.62548			1.88983	0.703062
					1.8914	0.473801			1.8914	0.644434			1.8914	0.703062
					1.89297	0.461956			1.89297	0.62548			1.89297	0.714221
					1.89454	0.438266			1.89454	0.62548			1.89454	0.714221
					1.89611	0.509336			1.89611	0.634957			1.89611	0.703062
					1.89769	0.580406			1.89769	0.634957			1.89769	0.691902
					1.89926	0.639631			1.89926	0.616003			1.89926	0.680742
					1.90083	0.639631			1.90083	0.634957			1.90083	0.680742
					1.9024	0.663322			1.9024	0.644434			1.9024	0.669583
					1.90397	0.675167			1.90397	0.672865			1.90397	0.680742
					1.90554	0.675167			1.90554	0.653911			1.90554	0.658423
					1.90711	0.698857			1.90711	0.672865			1.90711	0.647263
					1.90869	0.710702			1.90869	0.663388			1.90869	0.636104
					1.91026	0.675167			1.91026	0.682342			1.91026	0.658423
					1.91183	0.698857			1.91183	0.682342			1.91183	0.647263
					1.9134	0.675167			1.9134	0.691819			1.9134	0.658423
					1.91497	0.675167			1.91497	0.710772			1.91497	0.669583
					1.91654	0.663322			1.91654	0.710772			1.91654	0.647263
					1.91812	0.663322			1.91812	0.720249			1.91812	0.613784
					1.91969	0.663322			1.91969	0.701296			1.91969	0.613784
					1.92126	0.627786			1.92126	0.701296			1.92126	0.613784
					1.92283	0.663322			1.92283	0.653911			1.92283	0.613784
					1.9244	0.580406			1.9244	0.634957			1.9244	0.602624
					1.92597	0.639631			1.92597	0.606526			1.92597	0.613784
					1.92755	0.698857			1.92755	0.568618			1.92755	0.613784
					1.92912	0.698857			1.92912	0.511756			1.92912	0.613784
					1.93069	0.722547			1.93069	0.464371			1.93069	0.591465
					1.93226	0.734392			1.93226	0.464371			1.93226	0.602624
					1.93383	0.698857			1.93383	0.454894			1.93383	0.613784
					1.9354	0.722547			1.9354	0.473848			1.9354	0.591465
					1.93697	0.710702			1.93697	0.454894			1.93697	0.557986
					1.93855	0.698857			1.93855	0.445417			1.93855	0.580305
					1.94012	0.734392			1.94012	0.445417			1.94012	0.591465
					1.94169	0.734392			1.94169	0.445417			1.94169	0.602624
					1.94326	0.722547			1.94326	0.454894			1.94326	0.591465
					1.94483	0.722547			1.94483	0.502279			1.94483	0.613784
					1.9464	0.746237			1.9464	0.540187			1.9464	0.580305
					1.94798	0.746237			1.94798	0.568618			1.94798	0.591465
					1.94955	0.769927			1.94955	0.616003			1.94955	0.591465
					1.95112	0.781772			1.95112	0.644434			1.95112	0.580305
					1.95269	0.758082			1.95269	0.672865			1.95269	0.602624
					1.95426	0.758082			1.95426	0.691819			1.95426	0.613784
					1.95583	0.769927			1.95583	0.691819			1.95583	0.613784
					1.95741	0.758082			1.95741	0.691819			1.95741	0.602624
					1.95898	0.734392			1.95898	0.701296			1.95898	0.591465
					1.96055	0.710702			1.96055	0.682342			1.96055	0.636104
					1.96212	0.710702			1.96212	0.701296			1.96212	0.624944
					1.96369	0.722547			1.96369	0.682342			1.96369	0.613784
					1.96526	0.698857			1.96526	0.701296			1.96526	0.613784
					1.96684	0.722547			1.96684	0.701296			1.96684	0.613784
					1.96841	0.722547			1.96841	0.691819			1.96841	0.624944
					1.96998	0.722547			1.96998	0.691819			1.96998	0.636104
					1.97155	0.710702			1.97155	0.672865			1.97155	0.647263
					1.97312	0.734392			1.97312	0.616003			1.97312	0.647263
					1.97469	0.734392			1.97469	0.597049			1.97469	0.636104
					1.97626	0.769927			1.97626	0.53071			1.97626	0.636104
					1.97784	0.746237			1.97784	0.492802			1.97784	0.658423
					1.97941	0.769927			1.97941	0.464371			1.97941	0.658423
					1.98098	0.769927			1.98098	0.426463			1.98098	0.658423
					1.98255	0.793617			1.98255	0.473848			1.98255	0.680742
					1.98412	0.769927			1.98412	0.426463			1.98412	0.680742
					1.98569	0.769927			1.98569	0.445417			1.98569	0.669583
					1.98727	0.734392			1.98727	0.416987			1.98727	0.680742
					1.98884	0.734392			1.98884	0.43594			1.98884	0.691902
					1.99041	0.722547			1.99041	0.445417			1.99041	0.680742
					1.99198	0.710702			1.99198	0.454894			1.99198	0.669583
					1.99355	0.722547			1.99355	0.502279			1.99355	0.669583
					1.99512	0.722547			1.99512	0.540187			1.99512	0.680742
					1.9967	0.675167			1.9967	0.634957			1.9967	0.669583
					1.99827	0.651477			1.99827	0.644434			1.99827	0.680742
					1.99984	0.615941			1.99984	0.663388			1.99984	0.669583
					2.00141	0.604096			2.00141	0.691819			2.00141	0.669583
					2.00298	0.533026			2.00298	0.701296			2.00298	0.658423
					2.00455	0.533026			2.00455	0.691819			2.00455	0.658423
					2.00612	0.533026			2.00612	0.682342			2.00612	0.647263
					2.0077	0.533026			2.0077	0.701296			2.0077	0.636104
					2.00927	0.521181			2.00927	0.691819			2.00927	0.624944
					2.01084	0.521181			2.01084	0.691819			2.01084	0.613784
					2.01241	0.521181			2.01241	0.710772			2.01241	0.580305
					2.01398	0.533026			2.01398	0.682342			2.01398	0.557986
					2.01555	0.533026			2.01555	0.682342			2.01555	0.569145
					2.01713	0.544871			2.01713	0.672865			2.01713	0.546826
					2.0187	0.568561			2.0187	0.682342			2.0187	0.524506
					2.02027	0.615941			2.02027	0.672865			2.02027	0.535666
					2.02184	0.627786			2.02184	0.644434			2.02184	0.535666
					2.02341	0.651477			2.02341	0.653911			2.02341	0.524506
					2.02498	0.651477			2.02498	0.663388			2.02498	0.502187
					2.02656	0.639631			2.02656	0.653911			2.02656	0.513347
					2.02813	0.651477			2.02813	0.62548			2.02813	0.479868
					2.0297	0.627786			2.0297	0.634957			2.0297	0.502187
					2.03127	0.651477			2.03127	0.634957			2.03127	0.502187
					2.03284	0.687012			2.03284	0.653911			2.03284	0.502187
					2.03441	0.615941			2.03441	0.62548			2.03441	0.524506
					2.03598	0.592251			2.03598	0.62548			2.03598	0.502187
					2.03756	0.533026			2.03756	0.634957			2.03756	0.513347
					2.03913	0.509336			2.03913	0.634957			2.03913	0.535666
					2.0407	0.485646			2.0407	0.644434			2.0407	0.502187
					2.04227	0.438266			2.04227	0.644434			2.04227	0.524506
					2.04384	0.438266			2.04384	0.653911			2.04384	0.479868
					2.04541	0.438266			2.04541	0.653911			2.04541	0.546826
					2.04699	0.450111			2.04699	0.672865			2.04699	0.557986
					2.04856	0.497491			2.04856	0.653911			2.04856	0.613784
					2.05013	0.533026			2.05013	0.663388			2.05013	0.624944
					2.0517	0.568561			2.0517	0.691819			2.0517	0.691902
					2.05327	0.604096			2.05327	0.672865			2.05327	0.680742
					2.05484	0.592251			2.05484	0.682342			2.05484	0.703062
					2.05642	0.604096			2.05642	0.672865			2.05642	0.680742
					2.05799	0.604096			2.05799	0.682342			2.05799	0.703062
					2.05956	0.580406			2.05956	0.682342			2.05956	0.691902
					2.06113	0.627786			2.06113	0.672865			2.06113	0.691902
					2.0627	0.627786			2.0627	0.682342			2.0627	0.714221
					2.06427	0.651477			2.06427	0.682342			2.06427	0.736541
					2.06584	0.687012			2.06584	0.682342			2.06584	0.691902
					2.06742	0.663322			2.06742	0.672865			2.06742	0.714221
					2.06899	0.663322			2.06899	0.663388			2.06899	0.658423
					2.07056	0.675167			2.07056	0.644434			2.07056	0.636104
					2.07213	0.663322			2.07213	0.634957			2.07213	0.647263
					2.0737	0.663322			2.0737	0.644434			2.0737	0.613784
					2.07527	0.687012			2.07527	0.634957			2.07527	0.591465
					2.07685	0.651477			2.07685	0.634957			2.07685	0.591465
					2.07842	0.663322			2.07842	0.634957			2.07842	0.569145
					2.07999	0.627786			2.07999	0.644434			2.07999	0.580305
					2.08156	0.698857			2.08156	0.62548			2.08156	0.557986
					2.08313	0.675167			2.08313	0.634957			2.08313	0.591465
					2.0847	0.675167			2.0847	0.634957			2.0847	0.557986
					2.08628	0.675167			2.08628	0.62548			2.08628	0.546826
					2.08785	0.663322			2.08785	0.62548			2.08785	0.557986
					2.08942	0.639631			2.08942	0.644434			2.08942	0.546826
					2.09099	0.651477			2.09099	0.62548			2.09099	0.546826
					2.09256	0.663322			2.09256	0.653911			2.09256	0.557986
					2.09413	0.663322			2.09413	0.653911			2.09413	0.546826
					2.0957	0.675167			2.0957	0.663388			2.0957	0.557986
					2.09728	0.627786			2.09728	0.653911			2.09728	0.546826
					2.09885	0.663322			2.09885	0.682342			2.09885	0.557986
					2.10042	0.639631			2.10042	0.720249			2.10042	0.569145
					2.10199	0.651477			2.10199	0.691819			2.10199	0.535666
					2.10356	0.615941			2.10356	0.701296			2.10356	0.569145
					2.10513	0.639631			2.10513	0.691819			2.10513	0.580305
					2.10671	0.627786			2.10671	0.720249			2.10671	0.580305
					2.10828	0.604096			2.10828	0.682342			2.10828	0.658423
					2.10985	0.615941			2.10985	0.682342			2.10985	0.636104
					2.11142	0.556716			2.11142	0.672865			2.11142	0.636104
					2.11299	0.544871			2.11299	0.62548			2.11299	0.636104
					2.11456	0.592251			2.11456	0.616003			2.11456	0.636104
					2.11614	0.568561			2.11614	0.502279			2.11614	0.658423
					2.11771	0.568561			2.11771	0.454894			2.11771	0.636104
					2.11928	0.556716			2.11928	0.43594			2.11928	0.658423
					2.12085	0.568561			2.12085	0.416987			2.12085	0.680742
					2.12242	0.544871			2.12242	0.426463			2.12242	0.669583
					2.12399	0.568561			2.12399	0.426463			2.12399	0.669583
					2.12556	0.580406			2.12556	0.416987			2.12556	0.691902
					2.12714	0.544871			2.12714	0.445417			2.12714	0.647263
					2.12871	0.544871			2.12871	0.43594			2.12871	0.680742
					2.13028	0.592251			2.13028	0.445417			2.13028	0.680742
					2.13185	0.580406			2.13185	0.483325			2.13185	0.691902
					2.13342	0.604096			2.13342	0.521233			2.13342	0.647263
					2.13499	0.604096			2.13499	0.549664			2.13499	0.691902
					2.13657	0.580406			2.13657	0.606526			2.13657	0.680742
					2.13814	0.615941			2.13814	0.634957			2.13814	0.658423
					2.13971	0.604096			2.13971	0.682342			2.13971	0.636104
					2.14128	0.604096			2.14128	0.710772			2.14128	0.624944
					2.14285	0.592251			2.14285	0.701296			2.14285	0.591465
					2.14442	0.615941			2.14442	0.682342			2.14442	0.602624
					2.146	0.627786			2.146	0.701296			2.146	0.580305
					2.14757	0.651477			2.14757	0.682342			2.14757	0.569145
					2.14914	0.675167			2.14914	0.701296			2.14914	0.569145
					2.15071	0.698857			2.15071	0.691819			2.15071	0.580305
					2.15228	0.698857			2.15228	0.691819			2.15228	0.513347
					2.15385	0.687012			2.15385	0.682342			2.15385	0.535666
					2.15542	0.687012			2.15542	0.672865			2.15542	0.546826
					2.157	0.675167			2.157	0.682342			2.157	0.535666
					2.15857	0.663322			2.15857	0.691819			2.15857	0.535666
					2.16014	0.663322			2.16014	0.691819			2.16014	0.513347
					2.16171	0.639631			2.16171	0.616003			2.16171	0.513347
					2.16328	0.651477			2.16328	0.62548			2.16328	0.546826
					2.16485	0.627786			2.16485	0.606526			2.16485	0.524506
					2.16643	0.627786			2.16643	0.606526			2.16643	0.513347
					2.168	0.615941			2.168	0.578095			2.168	0.524506
					2.16957	0.568561			2.16957	0.587572			2.16957	0.513347
					2.17114	0.615941			2.17114	0.587572			2.17114	0.546826
					2.17271	0.627786			2.17271	0.587572			2.17271	0.557986
					2.17428	0.615941			2.17428	0.578095			2.17428	0.524506
					2.17586	0.615941			2.17586	0.559141			2.17586	0.524506
					2.17743	0.639631			2.17743	0.559141			2.17743	0.557986
					2.179	0.639631			2.179	0.597049			2.179	0.569145
					2.18057	0.615941			2.18057	0.587572			2.18057	0.591465
					2.18214	0.639631			2.18214	0.578095			2.18214	0.580305
					2.18371	0.663322			2.18371	0.587572			2.18371	0.613784
					2.18528	0.663322			2.18528	0.616003			2.18528	0.591465
					2.18686	0.639631			2.18686	0.634957			2.18686	0.602624
					2.18843	0.639631			2.18843	0.634957			2.18843	0.613784
					2.19	0.663322			2.19	0.663388			2.19	0.658423
					2.19157	0.675167			2.19157	0.663388			2.19157	0.658423
					2.19314	0.627786			2.19314	0.653911			2.19314	0.669583
					2.19471	0.639631			2.19471	0.682342			2.19471	0.647263
					2.19629	0.651477			2.19629	0.682342			2.19629	0.680742
					2.19786	0.651477			2.19786	0.672865			2.19786	0.658423
					2.19943	0.651477			2.19943	0.672865			2.19943	0.669583
					2.201	0.627786			2.201	0.663388			2.201	0.680742
					2.20257	0.627786			2.20257	0.672865			2.20257	0.669583
					2.20414	0.639631			2.20414	0.672865			2.20414	0.691902
					2.20572	0.615941			2.20572	0.663388			2.20572	0.680742
					2.20729	0.627786			2.20729	0.653911			2.20729	0.680742
					2.20886	0.615941			2.20886	0.672865			2.20886	0.669583
					2.21043	0.627786			2.21043	0.663388			2.21043	0.691902
					2.212	0.615941			2.212	0.682342			2.212	0.669583
					2.21357	0.604096			2.21357	0.682342			2.21357	0.658423
					2.21514	0.615941			2.21514	0.672865			2.21514	0.680742
					2.21672	0.627786			2.21672	0.672865			2.21672	0.680742
					2.21829	0.615941			2.21829	0.672865			2.21829	0.647263
					2.21986	0.615941			2.21986	0.682342			2.21986	0.647263
					2.22143	0.627786			2.22143	0.682342			2.22143	0.624944
					2.223	0.615941			2.223	0.682342			2.223	0.613784
					2.22457	0.639631			2.22457	0.701296			2.22457	0.591465
					2.22615	0.627786			2.22615	0.691819			2.22615	0.569145
					2.22772	0.627786			2.22772	0.672865			2.22772	0.569145
					2.22929	0.675167			2.22929	0.653911			2.22929	0.524506
					2.23086	0.627786			2.23086	0.616003			2.23086	0.535666
					2.23243	0.627786			2.23243	0.597049			2.23243	0.524506
					2.234	0.651477			2.234	0.559141			2.234	0.535666
					2.23558	0.651477			2.23558	0.521233			2.23558	0.524506
					2.23715	0.592251			2.23715	0.502279			2.23715	0.535666
					2.23872	0.604096			2.23872	0.464371			2.23872	0.513347
					2.24029	0.509336			2.24029	0.492802			2.24029	0.524506
					2.24186	0.461956			2.24186	0.464371			2.24186	0.535666
					2.24343	0.319816			2.24343	0.473848			2.24343	0.491027
					2.24501	0.260591			2.24501	0.464371			2.24501	0.513347
					2.24658	0.248746			2.24658	0.464371			2.24658	0.535666
					2.24815	0.21321			2.24815	0.483325			2.24815	0.524506
					2.24972	0.225056			2.24972	0.502279			2.24972	0.513347
					2.25129	0.201365			2.25129	0.568618			2.25129	0.513347
					2.25286	0.225056			2.25286	0.606526			2.25286	0.524506
					2.25443	0.201365			2.25443	0.62548			2.25443	0.502187
					2.25601	0.18952			2.25601	0.644434			2.25601	0.513347
					2.25758	0.201365			2.25758	0.672865			2.25758	0.524506
					2.25915	0.260591			2.25915	0.682342			2.25915	0.535666
					2.26072	0.319816			2.26072	0.701296			2.26072	0.535666
					2.26229	0.438266			2.26229	0.720249			2.26229	0.546826
					2.26386	0.473801			2.26386	0.701296			2.26386	0.569145
					2.26544	0.497491			2.26544	0.710772			2.26544	0.602624
					2.26701	0.556716			2.26701	0.672865			2.26701	0.602624
					2.26858	0.627786			2.26858	0.691819			2.26858	0.624944
					2.27015	0.604096			2.27015	0.672865			2.27015	0.636104
					2.27172	0.615941			2.27172	0.663388			2.27172	0.680742
					2.27329	0.627786			2.27329	0.653911			2.27329	0.703062
					2.27487	0.627786			2.27487	0.634957			2.27487	0.714221
					2.27644	0.592251			2.27644	0.616003			2.27644	0.747701
					2.27801	0.627786			2.27801	0.62548			2.27801	0.725381
					2.27958	0.604096			2.27958	0.606526			2.27958	0.736541
					2.28115	0.604096			2.28115	0.616003			2.28115	0.736541
					2.28272	0.615941			2.28272	0.606526			2.28272	0.703062
					2.28429	0.615941			2.28429	0.587572			2.28429	0.714221
					2.28587	0.568561			2.28587	0.597049			2.28587	0.703062
					2.28744	0.556716			2.28744	0.62548			2.28744	0.636104
					2.28901	0.544871			2.28901	0.597049			2.28901	0.602624
					2.29058	0.533026			2.29058	0.606526			2.29058	0.602624
					2.29215	0.509336			2.29215	0.634957			2.29215	0.580305
					2.29372	0.485646			2.29372	0.644434			2.29372	0.557986
					2.2953	0.509336			2.2953	0.653911			2.2953	0.502187
					2.29687	0.485646			2.29687	0.663388			2.29687	0.524506
					2.29844	0.509336			2.29844	0.653911			2.29844	0.502187
					2.30001	0.533026			2.30001	0.701296			2.30001	0.524506
					2.30158	0.544871			2.30158	0.663388			2.30158	0.524506
					2.30315	0.568561			2.30315	0.682342			2.30315	0.524506
					2.30473	0.627786			2.30473	0.672865			2.30473	0.502187
					2.3063	0.639631			2.3063	0.691819			2.3063	0.502187
					2.30787	0.663322			2.30787	0.691819			2.30787	0.513347
					2.30944	0.698857			2.30944	0.691819			2.30944	0.491027
					2.31101	0.698857			2.31101	0.701296			2.31101	0.513347
					2.31258	0.663322			2.31258	0.701296			2.31258	0.513347
					2.31415	0.675167			2.31415	0.653911			2.31415	0.491027
					2.31573	0.651477			2.31573	0.62548			2.31573	0.468708
					2.3173	0.651477			2.3173	0.587572			2.3173	0.479868
					2.31887	0.627786			2.31887	0.559141			2.31887	0.491027
					2.32044	0.604096			2.32044	0.540187			2.32044	0.502187
					2.32201	0.568561			2.32201	0.540187			2.32201	0.502187
					2.32358	0.568561			2.32358	0.502279			2.32358	0.524506
					2.32516	0.580406			2.32516	0.511756			2.32516	0.524506
					2.32673	0.544871			2.32673	0.492802			2.32673	0.524506
					2.3283	0.544871			2.3283	0.521233			2.3283	0.546826
					2.32987	0.556716			2.32987	0.521233			2.32987	0.569145
					2.33144	0.568561			2.33144	0.492802			2.33144	0.602624
					2.33301	0.556716			2.33301	0.511756			2.33301	0.613784
					2.33459	0.568561			2.33459	0.521233			2.33459	0.647263
					2.33616	0.556716			2.33616	0.521233			2.33616	0.669583
					2.33773	0.604096			2.33773	0.549664			2.33773	0.691902
					2.3393	0.604096			2.3393	0.606526			2.3393	0.691902
					2.34087	0.580406			2.34087	0.653911			2.34087	0.680742
					2.34244	0.568561			2.34244	0.672865			2.34244	0.669583
					2.34401	0.639631			2.34401	0.691819			2.34401	0.658423
					2.34559	0.627786			2.34559	0.682342			2.34559	0.680742
					2.34716	0.663322			2.34716	0.701296			2.34716	0.703062
					2.34873	0.698857			2.34873	0.682342			2.34873	0.703062
					2.3503	0.698857			2.3503	0.701296			2.3503	0.703062
					2.35187	0.651477			2.35187	0.701296			2.35187	0.703062
					2.35344	0.663322			2.35344	0.701296			2.35344	0.725381
					2.35502	0.675167			2.35502	0.672865			2.35502	0.736541
					2.35659	0.663322			2.35659	0.682342			2.35659	0.691902
					2.35816	0.687012			2.35816	0.691819			2.35816	0.691902
					2.35973	0.663322			2.35973	0.682342			2.35973	0.636104
					2.3613	0.710702			2.3613	0.663388			2.3613	0.602624
					2.36287	0.698857			2.36287	0.634957			2.36287	0.602624
					2.36445	0.687012			2.36445	0.653911			2.36445	0.591465
					2.36602	0.675167			2.36602	0.653911			2.36602	0.535666
					2.36759	0.687012			2.36759	0.634957			2.36759	0.502187
					2.36916	0.675167			2.36916	0.616003			2.36916	0.524506
					2.37073	0.651477			2.37073	0.616003			2.37073	0.513347
					2.3723	0.687012			2.3723	0.62548			2.3723	0.491027
					2.37387	0.651477			2.37387	0.606526			2.37387	0.479868
					2.37545	0.663322			2.37545	0.587572			2.37545	0.468708
					2.37702	0.663322			2.37702	0.578095			2.37702	0.468708
					2.37859	0.663322			2.37859	0.597049			2.37859	0.468708
					2.38016	0.675167			2.38016	0.578095			2.38016	0.468708
					2.38173	0.663322			2.38173	0.587572			2.38173	0.479868
					2.3833	0.639631			2.3833	0.597049			2.3833	0.468708
					2.38488	0.615941			2.38488	0.634957			2.38488	0.468708
					2.38645	0.651477			2.38645	0.644434			2.38645	0.513347
					2.38802	0.663322			2.38802	0.644434			2.38802	0.502187
					2.38959	0.627786			2.38959	0.663388			2.38959	0.468708
					2.39116	0.627786			2.39116	0.653911			2.39116	0.457548
					2.39273	0.627786			2.39273	0.672865			2.39273	0.479868
					2.39431	0.663322			2.39431	0.663388			2.39431	0.502187
					2.39588	0.627786			2.39588	0.672865			2.39588	0.491027
					2.39745	0.663322			2.39745	0.672865			2.39745	0.479868
					2.39902	0.651477			2.39902	0.663388			2.39902	0.479868
					2.40059	0.651477			2.40059	0.672865			2.40059	0.535666
					2.40216	0.651477			2.40216	0.663388			2.40216	0.502187
					2.40373	0.639631			2.40373	0.691819			2.40373	0.569145
					2.40531	0.663322			2.40531	0.682342			2.40531	0.580305
					2.40688	0.651477			2.40688	0.663388			2.40688	0.602624
					2.40845	0.675167			2.40845	0.672865			2.40845	0.613784
					2.41002	0.675167			2.41002	0.672865			2.41002	0.658423
					2.41159	0.663322			2.41159	0.663388			2.41159	0.658423
					2.41316	0.651477			2.41316	0.682342			2.41316	0.669583
					2.41474	0.663322			2.41474	0.682342			2.41474	0.669583
					2.41631	0.651477			2.41631	0.710772			2.41631	0.680742
					2.41788	0.651477			2.41788	0.653911			2.41788	0.680742
					2.41945	0.639631			2.41945	0.644434			2.41945	0.669583
					2.42102	0.663322			2.42102	0.644434			2.42102	0.691902
					2.42259	0.663322			2.42259	0.644434			2.42259	0.680742
					2.42417	0.663322			2.42417	0.644434			2.42417	0.691902
					2.42574	0.675167			2.42574	0.634957			2.42574	0.680742
					2.42731	0.687012			2.42731	0.62548			2.42731	0.691902
					2.42888	0.698857			2.42888	0.597049			2.42888	0.680742
					2.43045	0.663322			2.43045	0.587572			2.43045	0.680742
					2.43202	0.651477			2.43202	0.606526			2.43202	0.680742
					2.43359	0.651477			2.43359	0.597049			2.43359	0.669583
					2.43517	0.687012			2.43517	0.587572			2.43517	0.647263
					2.43674	0.675167			2.43674	0.568618			2.43674	0.624944
					2.43831	0.675167			2.43831	0.587572			2.43831	0.613784
					2.43988	0.687012			2.43988	0.587572			2.43988	0.591465
					2.44145	0.651477			2.44145	0.597049			2.44145	0.546826
					2.44302	0.663322			2.44302	0.578095			2.44302	0.524506
					2.4446	0.651477			2.4446	0.597049			2.4446	0.491027
					2.44617	0.663322			2.44617	0.616003			2.44617	0.468708
					2.44774	0.639631			2.44774	0.634957			2.44774	0.479868
					2.44931	0.663322			2.44931	0.634957			2.44931	0.491027
					2.45088	0.675167			2.45088	0.634957			2.45088	0.468708
					2.45245	0.615941			2.45245	0.644434			2.45245	0.491027
					2.45403	0.639631			2.45403	0.691819			2.45403	0.468708
					2.4556	0.639631			2.4556	0.691819			2.4556	0.457548
					2.45717	0.639631			2.45717	0.682342			2.45717	0.435229
					2.45874	0.639631			2.45874	0.691819			2.45874	0.491027
					2.46031	0.627786			2.46031	0.691819			2.46031	0.479868
					2.46188	0.639631			2.46188	0.682342			2.46188	0.457548
					2.46345	0.663322			2.46345	0.701296			2.46345	0.446388
					2.46503	0.627786			2.46503	0.710772			2.46503	0.446388
					2.4666	0.604096			2.4666	0.710772			2.4666	0.468708
					2.46817	0.615941			2.46817	0.710772			2.46817	0.491027
					2.46974	0.615941			2.46974	0.691819			2.46974	0.446388
					2.47131	0.615941			2.47131	0.701296			2.47131	0.468708
					2.47288	0.615941			2.47288	0.634957			2.47288	0.457548
					2.47446	0.604096			2.47446	0.644434			2.47446	0.446388
					2.47603	0.604096			2.47603	0.606526			2.47603	0.479868
					2.4776	0.604096			2.4776	0.578095			2.4776	0.491027
					2.47917	0.592251			2.47917	0.53071			2.47917	0.513347
					2.48074	0.615941			2.48074	0.473848			2.48074	0.546826
					2.48231	0.604096			2.48231	0.398033			2.48231	0.591465
					2.48389	0.592251			2.48389	0.416987			2.48389	0.613784
					2.48546	0.604096			2.48546	0.360125			2.48546	0.658423
					2.48703	0.604096			2.48703	0.379079			2.48703	0.680742
					2.4886	0.604096			2.4886	0.388556			2.4886	0.691902
					2.49017	0.592251			2.49017	0.388556			2.49017	0.691902
					2.49174	0.580406			2.49174	0.379079			2.49174	0.714221
					2.49332	0.604096			2.49332	0.40751			2.49332	0.77002
					2.49489	0.615941			2.49489	0.426463			2.49489	0.725381
					2.49646	0.604096			2.49646	0.43594			2.49646	0.736541
					2.49803	0.627786			2.49803	0.483325			2.49803	0.725381
					2.4996	0.675167			2.4996	0.549664			2.4996	0.680742
					2.50117	0.663322			2.50117	0.606526			2.50117	0.669583
					2.50274	0.651477			2.50274	0.653911			2.50274	0.669583
					2.50432	0.675167			2.50432	0.663388			2.50432	0.658423
					2.50589	0.698857			2.50589	0.682342			2.50589	0.658423
					2.50746	0.663322			2.50746	0.710772			2.50746	0.647263
					2.50903	0.663322			2.50903	0.682342			2.50903	0.647263
					2.5106	0.675167			2.5106	0.691819			2.5106	0.636104
					2.51217	0.675167			2.51217	0.691819			2.51217	0.624944
					2.51375	0.698857			2.51375	0.710772			2.51375	0.647263
					2.51532	0.663322			2.51532	0.710772			2.51532	0.647263
					2.51689	0.663322			2.51689	0.682342			2.51689	0.624944
					2.51846	0.687012			2.51846	0.691819			2.51846	0.624944
					2.52003	0.663322			2.52003	0.644434			2.52003	0.602624
					2.5216	0.627786			2.5216	0.634957			2.5216	0.591465
					2.52318	0.615941			2.52318	0.653911			2.52318	0.591465
					2.52475	0.592251			2.52475	0.663388			2.52475	0.613784
					2.52632	0.580406			2.52632	0.644434			2.52632	0.602624
					2.52789	0.556716			2.52789	0.644434			2.52789	0.624944
					2.52946	0.568561			2.52946	0.62548			2.52946	0.591465
					2.53103	0.592251			2.53103	0.616003			2.53103	0.591465
					2.5326	0.604096			2.5326	0.634957			2.5326	0.602624
					2.53418	0.627786			2.53418	0.62548			2.53418	0.602624
					2.53575	0.627786			2.53575	0.62548			2.53575	0.602624
					2.53732	0.627786			2.53732	0.634957			2.53732	0.613784
					2.53889	0.651477			2.53889	0.616003			2.53889	0.591465
					2.54046	0.639631			2.54046	0.644434			2.54046	0.602624
					2.54203	0.627786			2.54203	0.634957			2.54203	0.613784
					2.54361	0.615941			2.54361	0.653911			2.54361	0.613784
					2.54518	0.556716			2.54518	0.672865			2.54518	0.613784
					2.54675	0.556716			2.54675	0.653911			2.54675	0.613784
					2.54832	0.509336			2.54832	0.672865			2.54832	0.624944
					2.54989	0.509336			2.54989	0.682342			2.54989	0.613784
					2.55146	0.497491			2.55146	0.682342			2.55146	0.613784
					2.55304	0.580406			2.55304	0.663388			2.55304	0.624944
					2.55461	0.651477			2.55461	0.672865			2.55461	0.647263
					2.55618	0.663322			2.55618	0.682342			2.55618	0.636104
					2.55775	0.710702			2.55775	0.691819			2.55775	0.658423
					2.55932	0.698857			2.55932	0.691819			2.55932	0.636104
					2.56089	0.687012			2.56089	0.672865			2.56089	0.647263
					2.56246	0.651477			2.56246	0.682342			2.56246	0.647263
					2.56404	0.639631			2.56404	0.682342			2.56404	0.658423
					2.56561	0.533026			2.56561	0.663388			2.56561	0.658423
					2.56718	0.485646			2.56718	0.682342			2.56718	0.636104
					2.56875	0.402731			2.56875	0.653911			2.56875	0.669583
					2.57032	0.343506			2.57032	0.653911			2.57032	0.658423
					2.57189	0.296126			2.57189	0.653911			2.57189	0.624944
					2.57347	0.319816			2.57347	0.644434			2.57347	0.658423
					2.57504	0.272436			2.57504	0.663388			2.57504	0.658423
					2.57661	0.272436			2.57661	0.644434			2.57661	0.669583
					2.57818	0.284281			2.57818	0.653911			2.57818	0.669583
					2.57975	0.284281			2.57975	0.644434			2.57975	0.669583
					2.58132	0.272436			2.58132	0.62548			2.58132	0.658423
					2.5829	0.272436			2.5829	0.634957			2.5829	0.669583
					2.58447	0.331661			2.58447	0.62548			2.58447	0.680742
					2.58604	0.331661			2.58604	0.672865			2.58604	0.669583
					2.58761	0.379041			2.58761	0.672865			2.58761	0.680742
					2.58918	0.331661			2.58918	0.663388			2.58918	0.658423
					2.59075	0.426421			2.59075	0.663388			2.59075	0.658423
					2.59232	0.414576			2.59232	0.663388			2.59232	0.669583
					2.5939	0.402731			2.5939	0.663388			2.5939	0.669583
					2.59547	0.414576			2.59547	0.672865			2.59547	0.658423
					2.59704	0.414576			2.59704	0.682342			2.59704	0.691902
					2.59861	0.461956			2.59861	0.663388			2.59861	0.680742
					2.60018	0.461956			2.60018	0.682342			2.60018	0.658423
					2.60175	0.521181			2.60175	0.691819			2.60175	0.680742
					2.60333	0.556716			2.60333	0.682342			2.60333	0.647263
					2.6049	0.580406			2.6049	0.672865			2.6049	0.624944
					2.60647	0.639631			2.60647	0.691819			2.60647	0.647263
					2.60804	0.651477			2.60804	0.672865			2.60804	0.658423
					2.60961	0.651477			2.60961	0.663388			2.60961	0.624944
					2.61118	0.687012			2.61118	0.663388			2.61118	0.591465
					2.61276	0.663322			2.61276	0.653911			2.61276	0.591465
					2.61433	0.698857			2.61433	0.644434			2.61433	0.591465
					2.6159	0.698857			2.6159	0.634957			2.6159	0.591465
					2.61747	0.687012			2.61747	0.634957			2.61747	0.535666
					2.61904	0.663322			2.61904	0.62548			2.61904	0.557986
					2.62061	0.639631			2.62061	0.62548			2.62061	0.546826
					2.62218	0.675167			2.62218	0.634957			2.62218	0.602624
					2.62376	0.663322			2.62376	0.62548			2.62376	0.546826
					2.62533	0.663322			2.62533	0.606526			2.62533	0.591465
					2.6269	0.639631			2.6269	0.62548			2.6269	0.557986
					2.62847	0.615941			2.62847	0.634957			2.62847	0.557986
					2.63004	0.627786			2.63004	0.634957			2.63004	0.546826
					2.63161	0.663322			2.63161	0.62548			2.63161	0.569145
					2.63319	0.627786			2.63319	0.634957			2.63319	0.524506
					2.63476	0.675167			2.63476	0.62548			2.63476	0.546826
					2.63633	0.675167			2.63633	0.644434			2.63633	0.535666
					2.6379	0.675167			2.6379	0.653911			2.6379	0.535666
					2.63947	0.627786			2.63947	0.663388			2.63947	0.546826
					2.64104	0.580406			2.64104	0.672865			2.64104	0.580305
					2.64262	0.509336			2.64262	0.672865			2.64262	0.546826
					2.64419	0.426421			2.64419	0.672865			2.64419	0.546826
					2.64576	0.343506			2.64576	0.682342			2.64576	0.546826
					2.64733	0.296126			2.64733	0.691819			2.64733	0.591465
					2.6489	0.284281			2.6489	0.682342			2.6489	0.591465
					2.65047	0.296126			2.65047	0.682342			2.65047	0.613784
					2.65204	0.248746			2.65204	0.682342			2.65204	0.624944
					2.65362	0.307971			2.65362	0.701296			2.65362	0.624944
					2.65519	0.414576			2.65519	0.701296			2.65519	0.624944
					2.65676	0.509336			2.65676	0.701296			2.65676	0.647263
					2.65833	0.663322			2.65833	0.672865			2.65833	0.658423
					2.6599	0.663322			2.6599	0.663388			2.6599	0.647263
					2.66147	0.698857			2.66147	0.634957			2.66147	0.669583
					2.66305	0.687012			2.66305	0.587572			2.66305	0.680742
					2.66462	0.687012			2.66462	0.521233			2.66462	0.680742
					2.66619	0.698857			2.66619	0.473848			2.66619	0.714221
					2.66776	0.687012			2.66776	0.445417			2.66776	0.680742
					2.66933	0.687012			2.66933	0.416987			2.66933	0.680742
					2.6709	0.639631			2.6709	0.416987			2.6709	0.669583
					2.67248	0.675167			2.67248	0.350648			2.67248	0.680742
					2.67405	0.663322			2.67405	0.388556			2.67405	0.647263
					2.67562	0.627786			2.67562	0.40751			2.67562	0.658423
					2.67719	0.568561			2.67719	0.398033			2.67719	0.636104
					2.67876	0.544871			2.67876	0.426463			2.67876	0.624944
					2.68033	0.521181			2.68033	0.426463			2.68033	0.580305
					2.6819	0.509336			2.6819	0.483325			2.6819	0.569145
					2.68348	0.521181			2.68348	0.483325			2.68348	0.569145
					2.68505	0.533026			2.68505	0.559141			2.68505	0.535666
					2.68662	0.533026			2.68662	0.606526			2.68662	0.524506
					2.68819	0.521181			2.68819	0.663388			2.68819	0.535666
					2.68976	0.556716			2.68976	0.682342			2.68976	0.524506
					2.69133	0.556716			2.69133	0.691819			2.69133	0.535666
					2.69291	0.568561			2.69291	0.672865			2.69291	0.513347
					2.69448	0.556716			2.69448	0.682342			2.69448	0.513347
					2.69605	0.592251			2.69605	0.691819			2.69605	0.513347
					2.69762	0.568561			2.69762	0.663388			2.69762	0.513347
					2.69919	0.604096			2.69919	0.634957			2.69919	0.513347
					2.70076	0.568561			2.70076	0.616003			2.70076	0.524506
					2.70234	0.568561			2.70234	0.559141			2.70234	0.502187
					2.70391	0.544871			2.70391	0.53071			2.70391	0.502187
					2.70548	0.533026			2.70548	0.483325			2.70548	0.491027
					2.70705	0.544871			2.70705	0.454894			2.70705	0.513347
					2.70862	0.556716			2.70862	0.416987			2.70862	0.502187
					2.71019	0.580406			2.71019	0.40751			2.71019	0.513347
					2.71176	0.592251			2.71176	0.416987			2.71176	0.502187
					2.71334	0.615941			2.71334	0.426463			2.71334	0.502187
					2.71491	0.604096			2.71491	0.416987			2.71491	0.502187
					2.71648	0.651477			2.71648	0.416987			2.71648	0.513347
					2.71805	0.639631			2.71805	0.40751			2.71805	0.546826
					2.71962	0.639631			2.71962	0.445417			2.71962	0.557986
					2.72119	0.675167			2.72119	0.473848			2.72119	0.569145
					2.72277	0.663322			2.72277	0.540187			2.72277	0.613784
					2.72434	0.639631			2.72434	0.549664			2.72434	0.624944
					2.72591	0.710702			2.72591	0.616003			2.72591	0.636104
					2.72748	0.663322			2.72748	0.663388			2.72748	0.658423
					2.72905	0.663322			2.72905	0.672865			2.72905	0.680742
					2.73062	0.639631			2.73062	0.691819			2.73062	0.691902
					2.7322	0.651477			2.7322	0.682342			2.7322	0.703062
					2.73377	0.663322			2.73377	0.682342			2.73377	0.703062
					2.73534	0.651477			2.73534	0.682342			2.73534	0.703062
					2.73691	0.627786			2.73691	0.682342			2.73691	0.680742
					2.73848	0.675167			2.73848	0.672865			2.73848	0.669583
					2.74005	0.651477			2.74005	0.672865			2.74005	0.680742
					2.74163	0.639631			2.74163	0.634957			2.74163	0.658423
					2.7432	0.675167			2.7432	0.644434			2.7432	0.613784
					2.74477	0.663322			2.74477	0.663388			2.74477	0.636104
					2.74634	0.627786			2.74634	0.653911			2.74634	0.602624
					2.74791	0.651477			2.74791	0.653911			2.74791	0.557986
					2.74948	0.639631			2.74948	0.663388			2.74948	0.546826
					2.75105	0.627786			2.75105	0.634957			2.75105	0.546826
					2.75263	0.615941			2.75263	0.644434			2.75263	0.546826
					2.7542	0.627786			2.7542	0.663388			2.7542	0.524506
					2.75577	0.615941			2.75577	0.672865			2.75577	0.535666
					2.75734	0.627786			2.75734	0.663388			2.75734	0.524506
					2.75891	0.615941			2.75891	0.653911			2.75891	0.524506
					2.76048	0.627786			2.76048	0.682342			2.76048	0.535666
					2.76206	0.651477			2.76206	0.672865			2.76206	0.524506
					2.76363	0.615941			2.76363	0.653911			2.76363	0.513347
					2.7652	0.627786			2.7652	0.653911			2.7652	0.502187
					2.76677	0.627786			2.76677	0.653911			2.76677	0.513347
					2.76834	0.627786			2.76834	0.62548			2.76834	0.513347
					2.76991	0.639631			2.76991	0.616003			2.76991	0.524506
					2.77149	0.663322			2.77149	0.578095			2.77149	0.535666
					2.77306	0.639631			2.77306	0.511756			2.77306	0.502187
					2.77463	0.651477			2.77463	0.53071			2.77463	0.502187
					2.7762	0.627786			2.7762	0.521233			2.7762	0.569145
					2.77777	0.627786			2.77777	0.511756			2.77777	0.546826
					2.77934	0.639631			2.77934	0.502279			2.77934	0.524506
					2.78091	0.627786			2.78091	0.492802			2.78091	0.535666
					2.78249	0.639631			2.78249	0.483325			2.78249	0.535666
					2.78406	0.639631			2.78406	0.492802			2.78406	0.580305
					2.78563	0.615941			2.78563	0.492802			2.78563	0.591465
					2.7872	0.639631			2.7872	0.492802			2.7872	0.613784
					2.78877	0.627786			2.78877	0.511756			2.78877	0.636104
					2.79034	0.627786			2.79034	0.540187			2.79034	0.647263
					2.79192	0.639631			2.79192	0.578095			2.79192	0.669583
					2.79349	0.651477			2.79349	0.587572			2.79349	0.703062
					2.79506	0.627786			2.79506	0.634957			2.79506	0.714221
					2.79663	0.639631			2.79663	0.663388			2.79663	0.691902
					2.7982	0.651477			2.7982	0.653911			2.7982	0.725381
					2.79977	0.675167			2.79977	0.672865			2.79977	0.691902
					2.80135	0.627786			2.80135	0.701296			2.80135	0.680742
					2.80292	0.627786			2.80292	0.682342			2.80292	0.703062
					2.80449	0.639631			2.80449	0.682342			2.80449	0.703062
					2.80606	0.639631			2.80606	0.710772			2.80606	0.647263
					2.80763	0.639631			2.80763	0.710772			2.80763	0.613784
					2.8092	0.615941			2.8092	0.710772			2.8092	0.580305
					2.81077	0.675167			2.81077	0.682342			2.81077	0.580305
					2.81235	0.663322			2.81235	0.663388			2.81235	0.546826
					2.81392	0.639631			2.81392	0.691819			2.81392	0.535666
					2.81549	0.639631			2.81549	0.644434			2.81549	0.546826
					2.81706	0.627786			2.81706	0.672865			2.81706	0.513347
					2.81863	0.615941			2.81863	0.672865			2.81863	0.546826
					2.8202	0.639631			2.8202	0.653911			2.8202	0.535666
					2.82178	0.651477			2.82178	0.653911			2.82178	0.502187
					2.82335	0.651477			2.82335	0.62548			2.82335	0.535666
					2.82492	0.675167			2.82492	0.606526			2.82492	0.524506
					2.82649	0.675167			2.82649	0.634957			2.82649	0.535666
					2.82806	0.663322			2.82806	0.62548			2.82806	0.546826
					2.82963	0.663322			2.82963	0.606526			2.82963	0.513347
					2.83121	0.698857			2.83121	0.616003			2.83121	0.513347
					2.83278	0.687012			2.83278	0.597049			2.83278	0.513347
					2.83435	0.663322			2.83435	0.62548			2.83435	0.524506
					2.83592	0.568561			2.83592	0.644434			2.83592	0.513347
					2.83749	0.426421			2.83749	0.634957			2.83749	0.524506
					2.83906	0.319816			2.83906	0.644434			2.83906	0.524506
					2.84063	0.284281			2.84063	0.653911			2.84063	0.535666
					2.84221	0.307971			2.84221	0.663388			2.84221	0.535666
					2.84378	0.296126			2.84378	0.682342			2.84378	0.513347
					2.84535	0.284281			2.84535	0.653911			2.84535	0.591465
					2.84692	0.272436			2.84692	0.682342			2.84692	0.569145
					2.84849	0.355351			2.84849	0.682342			2.84849	0.602624
					2.85006	0.379041			2.85006	0.672865			2.85006	0.602624
					2.85164	0.485646			2.85164	0.653911			2.85164	0.602624
					2.85321	0.544871			2.85321	0.672865			2.85321	0.636104
					2.85478	0.533026			2.85478	0.682342			2.85478	0.658423
					2.85635	0.533026			2.85635	0.672865			2.85635	0.669583
					2.85792	0.556716			2.85792	0.691819			2.85792	0.703062
					2.85949	0.533026			2.85949	0.672865			2.85949	0.703062
					2.86107	0.533026			2.86107	0.672865			2.86107	0.680742
					2.86264	0.521181			2.86264	0.682342			2.86264	0.714221
					2.86421	0.461956			2.86421	0.644434			2.86421	0.714221
					2.86578	0.367196			2.86578	0.644434			2.86578	0.680742
					2.86735	0.343506			2.86735	0.644434			2.86735	0.691902
					2.86892	0.367196			2.86892	0.653911			2.86892	0.658423
					2.87049	0.379041			2.87049	0.634957			2.87049	0.669583
					2.87207	0.390886			2.87207	0.634957			2.87207	0.669583
					2.87364	0.414576			2.87364	0.653911			2.87364	0.669583
					2.87521	0.426421			2.87521	0.616003			2.87521	0.658423
					2.87678	0.461956			2.87678	0.606526			2.87678	0.680742
					2.87835	0.473801			2.87835	0.606526			2.87835	0.658423
					2.87992	0.533026			2.87992	0.616003			2.87992	0.669583
					2.8815	0.568561			2.8815	0.606526			2.8815	0.647263
					2.88307	0.568561			2.88307	0.568618			2.88307	0.669583
					2.88464	0.627786			2.88464	0.616003			2.88464	0.636104
					2.88621	0.675167			2.88621	0.616003			2.88621	0.636104
					2.88778	0.698857			2.88778	0.616003			2.88778	0.658423
					2.88935	0.698857			2.88935	0.644434			2.88935	0.624944
					2.89093	0.651477			2.89093	0.644434			2.89093	0.636104
					2.8925	0.675167			2.8925	0.634957			2.8925	0.636104
					2.89407	0.675167			2.89407	0.663388			2.89407	0.613784
					2.89564	0.663322			2.89564	0.672865			2.89564	0.613784
					2.89721	0.675167			2.89721	0.672865			2.89721	0.602624
					2.89878	0.663322			2.89878	0.691819			2.89878	0.580305
					2.90035	0.675167			2.90035	0.710772			2.90035	0.591465
					2.90193	0.651477			2.90193	0.701296			2.90193	0.613784
					2.9035	0.675167			2.9035	0.691819			2.9035	0.613784
					2.90507	0.675167			2.90507	0.701296			2.90507	0.569145
					2.90664	0.687012			2.90664	0.701296			2.90664	0.569145
					2.90821	0.651477			2.90821	0.691819			2.90821	0.580305
					2.90978	0.651477			2.90978	0.682342			2.90978	0.580305
					2.91136	0.651477			2.91136	0.672865			2.91136	0.591465
					2.91293	0.651477			2.91293	0.606526			2.91293	0.602624
					2.9145	0.627786			2.9145	0.578095			2.9145	0.602624
					2.91607	0.615941			2.91607	0.568618			2.91607	0.602624
					2.91764	0.615941			2.91764	0.549664			2.91764	0.624944
					2.91921	0.615941			2.91921	0.492802			2.91921	0.613784
					2.92079	0.627786			2.92079	0.502279			2.92079	0.602624
					2.92236	0.580406			2.92236	0.473848			2.92236	0.602624
					2.92393	0.568561			2.92393	0.492802			2.92393	0.636104
					2.9255	0.627786			2.9255	0.492802			2.9255	0.636104
					2.92707	0.568561			2.92707	0.464371			2.92707	0.647263
					2.92864	0.556716			2.92864	0.464371			2.92864	0.624944
					2.93021	0.568561			2.93021	0.483325			2.93021	0.636104
					2.93179	0.580406			2.93179	0.511756			2.93179	0.647263
					2.93336	0.639631			2.93336	0.549664			2.93336	0.658423
					2.93493	0.663322			2.93493	0.540187			2.93493	0.658423
					2.9365	0.710702			2.9365	0.587572			2.9365	0.669583
					2.93807	0.722547			2.93807	0.62548			2.93807	0.669583
					2.93964	0.687012			2.93964	0.653911			2.93964	0.669583
					2.94122	0.627786			2.94122	0.653911			2.94122	0.680742
					2.94279	0.615941			2.94279	0.663388			2.94279	0.680742
					2.94436	0.533026			2.94436	0.682342			2.94436	0.703062
					2.94593	0.521181			2.94593	0.691819			2.94593	0.703062
					2.9475	0.497491			2.9475	0.672865			2.9475	0.703062
					2.94907	0.497491			2.94907	0.710772			2.94907	0.714221
					2.95065	0.544871			2.95065	0.672865			2.95065	0.703062
					2.95222	0.509336			2.95222	0.691819			2.95222	0.691902
					2.95379	0.556716			2.95379	0.672865			2.95379	0.680742
					2.95536	0.615941			2.95536	0.672865			2.95536	0.736541
					2.95693	0.663322			2.95693	0.663388			2.95693	0.714221
					2.9585	0.687012			2.9585	0.653911			2.9585	0.680742
					2.96007	0.675167			2.96007	0.672865			2.96007	0.703062
					2.96165	0.675167			2.96165	0.634957			2.96165	0.725381
					2.96322	0.675167			2.96322	0.663388			2.96322	0.669583
					2.96479	0.627786			2.96479	0.606526			2.96479	0.691902
					2.96636	0.615941			2.96636	0.616003			2.96636	0.680742
					2.96793	0.592251			2.96793	0.578095			2.96793	0.680742
					2.9695	0.615941			2.9695	0.597049			2.9695	0.669583
					2.97108	0.580406			2.97108	0.578095			2.97108	0.669583
					2.97265	0.556716			2.97265	0.578095			2.97265	0.658423
					2.97422	0.604096			2.97422	0.578095			2.97422	0.658423
					2.97579	0.580406			2.97579	0.559141			2.97579	0.658423
					2.97736	0.544871			2.97736	0.578095			2.97736	0.636104
					2.97893	0.544871			2.97893	0.587572			2.97893	0.624944
					2.98051	0.604096			2.98051	0.587572			2.98051	0.647263
					2.98208	0.580406			2.98208	0.597049			2.98208	0.624944
					2.98365	0.580406			2.98365	0.587572			2.98365	0.602624
					2.98522	0.604096			2.98522	0.62548			2.98522	0.613784
					2.98679	0.580406			2.98679	0.644434			2.98679	0.613784
					2.98836	0.627786			2.98836	0.653911			2.98836	0.613784
					2.98993	0.615941			2.98993	0.663388			2.98993	0.624944
					2.99151	0.615941			2.99151	0.663388			2.99151	0.624944
					2.99308	0.627786			2.99308	0.682342			2.99308	0.636104
					2.99465	0.604096			2.99465	0.672865			2.99465	0.602624
					2.99622	0.639631			2.99622	0.672865			2.99622	0.624944
					2.99779	0.627786			2.99779	0.691819			2.99779	0.613784
					2.99936	0.615941			2.99936	0.672865			2.99936	0.613784
					3.00094	0.639631			3.00094	0.653911			3.00094	0.624944
					3.00251	0.615941			3.00251	0.663388			3.00251	0.613784
					3.00408	0.615941			3.00408	0.663388			3.00408	0.624944
					3.00565	0.627786			3.00565	0.672865			3.00565	0.658423
					3.00722	0.639631			3.00722	0.644434			3.00722	0.680742
					3.00879	0.651477			3.00879	0.653911			3.00879	0.669583
					3.01037	0.651477			3.01037	0.663388			3.01037	0.714221
					3.01194	0.627786			3.01194	0.653911			3.01194	0.703062
					3.01351	0.651477			3.01351	0.653911			3.01351	0.714221
					3.01508	0.627786			3.01508	0.653911			3.01508	0.714221
					3.01665	0.675167			3.01665	0.644434			3.01665	0.703062
					3.01822	0.651477			3.01822	0.644434			3.01822	0.691902
					3.0198	0.627786			3.0198	0.653911			3.0198	0.669583
					3.02137	0.651477			3.02137	0.644434			3.02137	0.636104
					3.02294	0.663322			3.02294	0.644434			3.02294	0.624944
					3.02451	0.675167			3.02451	0.634957			3.02451	0.591465
					3.02608	0.675167			3.02608	0.634957			3.02608	0.557986
					3.02765	0.663322			3.02765	0.62548			3.02765	0.535666
					3.02922	0.663322			3.02922	0.62548			3.02922	0.524506
					3.0308	0.639631			3.0308	0.62548			3.0308	0.502187
					3.03237	0.627786			3.03237	0.616003			3.03237	0.513347
					3.03394	0.604096			3.03394	0.634957			3.03394	0.513347
					3.03551	0.604096			3.03551	0.62548			3.03551	0.491027
					3.03708	0.592251			3.03708	0.644434			3.03708	0.491027
					3.03865	0.580406			3.03865	0.634957			3.03865	0.502187
					3.04023	0.592251			3.04023	0.62548			3.04023	0.491027
					3.0418	0.604096			3.0418	0.644434			3.0418	0.502187
					3.04337	0.544871			3.04337	0.634957			3.04337	0.502187
					3.04494	0.568561			3.04494	0.644434			3.04494	0.491027
					3.04651	0.580406			3.04651	0.663388			3.04651	0.513347
					3.04808	0.568561			3.04808	0.653911			3.04808	0.491027
					3.04966	0.568561			3.04966	0.663388			3.04966	0.491027
					3.05123	0.568561			3.05123	0.663388			3.05123	0.479868
					3.0528	0.627786			3.0528	0.644434			3.0528	0.513347
					3.05437	0.592251			3.05437	0.682342			3.05437	0.491027
					3.05594	0.544871			3.05594	0.663388			3.05594	0.535666
					3.05751	0.592251			3.05751	0.672865			3.05751	0.535666
					3.05908	0.556716			3.05908	0.672865			3.05908	0.557986
					3.06066	0.568561			3.06066	0.644434			3.06066	0.636104
					3.06223	0.556716			3.06223	0.653911			3.06223	0.658423
					3.0638	0.544871			3.0638	0.644434			3.0638	0.658423
					3.06537	0.615941			3.06537	0.691819			3.06537	0.714221
					3.06694	0.675167			3.06694	0.682342			3.06694	0.703062
					3.06851	0.687012			3.06851	0.653911			3.06851	0.725381
					3.07009	0.675167			3.07009	0.653911			3.07009	0.736541
					3.07166	0.675167			3.07166	0.653911			3.07166	0.736541
					3.07323	0.687012			3.07323	0.653911			3.07323	0.736541
					3.0748	0.651477			3.0748	0.663388			3.0748	0.747701
					3.07637	0.675167			3.07637	0.634957			3.07637	0.75886
					3.07794	0.604096			3.07794	0.653911			3.07794	0.714221
					3.07952	0.568561			3.07952	0.672865			3.07952	0.714221
					3.08109	0.544871			3.08109	0.653911			3.08109	0.691902
					3.08266	0.509336			3.08266	0.663388			3.08266	0.691902
					3.08423	0.533026			3.08423	0.663388			3.08423	0.658423
					3.0858	0.509336			3.0858	0.672865			3.0858	0.658423
					3.08737	0.485646			3.08737	0.672865			3.08737	0.669583
					3.08894	0.485646			3.08894	0.672865			3.08894	0.624944
					3.09052	0.461956			3.09052	0.682342			3.09052	0.658423
					3.09209	0.450111			3.09209	0.701296			3.09209	0.624944
					3.09366	0.450111			3.09366	0.682342			3.09366	0.602624
					3.09523	0.450111			3.09523	0.691819			3.09523	0.580305
					3.0968	0.473801			3.0968	0.672865			3.0968	0.591465
					3.09837	0.485646			3.09837	0.62548			3.09837	0.580305
					3.09995	0.568561			3.09995	0.568618			3.09995	0.569145
					3.10152	0.627786			3.10152	0.521233			3.10152	0.569145
					3.10309	0.627786			3.10309	0.473848			3.10309	0.569145
					3.10466	0.639631			3.10466	0.43594			3.10466	0.591465
					3.10623	0.639631			3.10623	0.388556			3.10623	0.546826
					3.1078	0.639631			3.1078	0.40751			3.1078	0.569145
					3.10938	0.698857			3.10938	0.388556			3.10938	0.569145
					3.11095	0.663322			3.11095	0.398033			3.11095	0.535666
					3.11252	0.722547			3.11252	0.398033			3.11252	0.546826
					3.11409	0.651477			3.11409	0.398033			3.11409	0.557986
					3.11566	0.663322			3.11566	0.398033			3.11566	0.535666
					3.11723	0.675167			3.11723	0.426463			3.11723	0.557986
					3.1188	0.615941			3.1188	0.445417			3.1188	0.557986
					3.12038	0.592251			3.12038	0.483325			3.12038	0.546826
					3.12195	0.556716			3.12195	0.473848			3.12195	0.580305
					3.12352	0.521181			3.12352	0.559141			3.12352	0.557986
					3.12509	0.509336			3.12509	0.616003			3.12509	0.557986
					3.12666	0.497491			3.12666	0.653911			3.12666	0.569145
					3.12823	0.497491			3.12823	0.644434			3.12823	0.569145
					3.12981	0.473801			3.12981	0.672865			3.12981	0.602624
					3.13138	0.533026			3.13138	0.682342			3.13138	0.591465
					3.13295	0.509336			3.13295	0.672865			3.13295	0.580305
					3.13452	0.509336			3.13452	0.682342			3.13452	0.624944
					3.13609	0.533026			3.13609	0.672865			3.13609	0.624944
					3.13766	0.568561			3.13766	0.710772			3.13766	0.636104
					3.13924	0.533026			3.13924	0.691819			3.13924	0.669583
					3.14081	0.533026			3.14081	0.701296			3.14081	0.658423
					3.14238	0.544871			3.14238	0.663388			3.14238	0.669583
					3.14395	0.544871			3.14395	0.672865			3.14395	0.669583
					3.14552	0.521181			3.14552	0.672865			3.14552	0.703062
					3.14709	0.533026			3.14709	0.644434			3.14709	0.714221
					3.14866	0.556716			3.14866	0.634957			3.14866	0.703062
					3.15024	0.544871			3.15024	0.587572			3.15024	0.725381
					3.15181	0.556716			3.15181	0.587572			3.15181	0.714221
					3.15338	0.580406			3.15338	0.53071			3.15338	0.736541
					3.15495	0.639631			3.15495	0.492802			3.15495	0.725381
					3.15652	0.639631			3.15652	0.492802			3.15652	0.736541
					3.15809	0.675167			3.15809	0.464371			3.15809	0.725381
					3.15967	0.651477			3.15967	0.43594			3.15967	0.691902
					3.16124	0.675167			3.16124	0.43594			3.16124	0.680742
					3.16281	0.675167			3.16281	0.426463			3.16281	0.658423
					3.16438	0.675167			3.16438	0.43594			3.16438	0.636104
					3.16595	0.675167			3.16595	0.43594			3.16595	0.636104
					3.16752	0.663322			3.16752	0.445417			3.16752	0.591465
					3.1691	0.675167			3.1691	0.473848			3.1691	0.535666
					3.17067	0.675167			3.17067	0.473848			3.17067	0.513347
					3.17224	0.663322			3.17224	0.540187			3.17224	0.513347
					3.17381	0.651477			3.17381	0.597049			3.17381	0.513347
					3.17538	0.663322			3.17538	0.616003			3.17538	0.513347
					3.17695	0.651477			3.17695	0.644434			3.17695	0.491027
					3.17852	0.651477			3.17852	0.672865			3.17852	0.524506
					3.1801	0.639631			3.1801	0.653911			3.1801	0.513347
					3.18167	0.663322			3.18167	0.672865			3.18167	0.502187
					3.18324	0.639631			3.18324	0.672865			3.18324	0.502187
					3.18481	0.675167			3.18481	0.672865			3.18481	0.479868
					3.18638	0.615941			3.18638	0.682342			3.18638	0.468708
					3.18795	0.615941			3.18795	0.663388			3.18795	0.524506
					3.18953	0.651477			3.18953	0.691819			3.18953	0.513347
					3.1911	0.627786			3.1911	0.691819			3.1911	0.524506
					3.19267	0.675167			3.19267	0.710772			3.19267	0.502187
					3.19424	0.651477			3.19424	0.691819			3.19424	0.524506
					3.19581	0.639631			3.19581	0.672865			3.19581	0.524506
					3.19738	0.651477			3.19738	0.672865			3.19738	0.513347
					3.19896	0.615941			3.19896	0.663388			3.19896	0.513347
					3.20053	0.675167			3.20053	0.672865			3.20053	0.524506
					3.2021	0.675167			3.2021	0.672865			3.2021	0.513347
					3.20367	0.687012			3.20367	0.682342			3.20367	0.569145
					3.20524	0.663322			3.20524	0.653911			3.20524	0.569145
					3.20681	0.651477			3.20681	0.634957			3.20681	0.613784
					3.20838	0.663322			3.20838	0.616003			3.20838	0.636104
					3.20996	0.651477			3.20996	0.559141			3.20996	0.658423
					3.21153	0.651477			3.21153	0.502279			3.21153	0.669583
					3.2131	0.639631			3.2131	0.492802			3.2131	0.725381
					3.21467	0.639631			3.21467	0.492802			3.21467	0.691902
					3.21624	0.651477			3.21624	0.492802			3.21624	0.680742
					3.21781	0.651477			3.21781	0.492802			3.21781	0.725381
					3.21939	0.604096			3.21939	0.483325			3.21939	0.747701
					3.22096	0.639631			3.22096	0.483325			3.22096	0.747701
					3.22253	0.663322			3.22253	0.492802			3.22253	0.725381
					3.2241	0.639631			3.2241	0.464371			3.2241	0.736541
					3.22567	0.627786			3.22567	0.492802			3.22567	0.725381
					3.22724	0.615941			3.22724	0.492802			3.22724	0.714221
					3.22882	0.675167			3.22882	0.511756			3.22882	0.669583
					3.23039	0.675167			3.23039	0.549664			3.23039	0.647263
					3.23196	0.627786			3.23196	0.587572			3.23196	0.658423
					3.23353	0.675167			3.23353	0.597049			3.23353	0.602624
					3.2351	0.651477			3.2351	0.653911			3.2351	0.602624
					3.23667	0.663322			3.23667	0.653911			3.23667	0.613784
					3.23824	0.663322			3.23824	0.682342			3.23824	0.591465
					3.23982	0.651477			3.23982	0.653911			3.23982	0.569145
					3.24139	0.651477			3.24139	0.691819			3.24139	0.557986
					3.24296	0.651477			3.24296	0.701296			3.24296	0.557986
					3.24453	0.663322			3.24453	0.701296			3.24453	0.557986
					3.2461	0.663322			3.2461	0.710772			3.2461	0.546826
					3.24767	0.651477			3.24767	0.691819			3.24767	0.557986
					3.24925	0.639631			3.24925	0.682342			3.24925	0.569145
					3.25082	0.663322			3.25082	0.653911			3.25082	0.557986
					3.25239	0.627786			3.25239	0.672865			3.25239	0.524506
					3.25396	0.675167			3.25396	0.682342			3.25396	0.546826
					3.25553	0.663322			3.25553	0.682342			3.25553	0.546826
					3.2571	0.663322			3.2571	0.653911			3.2571	0.535666
					3.25868	0.639631			3.25868	0.644434			3.25868	0.557986
					3.26025	0.639631			3.26025	0.634957			3.26025	0.546826
					3.26182	0.639631			3.26182	0.663388			3.26182	0.569145
					3.26339	0.651477			3.26339	0.634957			3.26339	0.557986
					3.26496	0.663322			3.26496	0.663388			3.26496	0.546826
					3.26653	0.639631			3.26653	0.587572			3.26653	0.546826
					3.26811	0.627786			3.26811	0.597049			3.26811	0.557986
					3.26968	0.639631			3.26968	0.606526			3.26968	0.569145
					3.27125	0.675167			3.27125	0.597049			3.27125	0.602624
					3.27282	0.651477			3.27282	0.587572			3.27282	0.602624
					3.27439	0.675167			3.27439	0.587572			3.27439	0.591465
					3.27596	0.639631			3.27596	0.597049			3.27596	0.624944
					3.27753	0.663322			3.27753	0.606526			3.27753	0.636104
					3.27911	0.627786			3.27911	0.62548			3.27911	0.658423
					3.28068	0.651477			3.28068	0.616003			3.28068	0.669583
					3.28225	0.639631			3.28225	0.62548			3.28225	0.669583
					3.28382	0.651477			3.28382	0.634957			3.28382	0.669583
					3.28539	0.615941			3.28539	0.644434			3.28539	0.680742
					3.28696	0.627786			3.28696	0.663388			3.28696	0.680742
					3.28854	0.639631			3.28854	0.672865			3.28854	0.669583
					3.29011	0.615941			3.29011	0.672865			3.29011	0.669583
					3.29168	0.615941			3.29168	0.653911			3.29168	0.691902
					3.29325	0.627786			3.29325	0.701296			3.29325	0.669583
					3.29482	0.627786			3.29482	0.682342			3.29482	0.680742
					3.29639	0.604096			3.29639	0.672865			3.29639	0.680742
					3.29797	0.615941			3.29797	0.701296			3.29797	0.691902
					3.29954	0.627786			3.29954	0.672865			3.29954	0.691902
					3.30111	0.615941			3.30111	0.663388			3.30111	0.691902
					3.30268	0.604096			3.30268	0.691819			3.30268	0.691902
					3.30425	0.627786			3.30425	0.682342			3.30425	0.680742
					3.30582	0.663322			3.30582	0.672865			3.30582	0.691902
					3.30739	0.639631			3.30739	0.701296			3.30739	0.658423
					3.30897	0.627786			3.30897	0.691819			3.30897	0.647263
					3.31054	0.615941			3.31054	0.691819			3.31054	0.624944
					3.31211	0.663322			3.31211	0.644434			3.31211	0.613784
					3.31368	0.651477			3.31368	0.62548			3.31368	0.613784
					3.31525	0.651477			3.31525	0.62548			3.31525	0.591465
					3.31682	0.663322			3.31682	0.616003			3.31682	0.569145
					3.3184	0.675167			3.3184	0.616003			3.3184	0.535666
					3.31997	0.651477			3.31997	0.606526			3.31997	0.524506
					3.32154	0.687012			3.32154	0.597049			3.32154	0.491027
					3.32311	0.651477			3.32311	0.568618			3.32311	0.502187
					3.32468	0.675167			3.32468	0.568618			3.32468	0.502187
					3.32625	0.651477			3.32625	0.568618			3.32625	0.513347
					3.32783	0.687012			3.32783	0.559141			3.32783	0.502187
					3.3294	0.651477			3.3294	0.568618			3.3294	0.502187
					3.33097	0.651477			3.33097	0.587572			3.33097	0.513347
					3.33254	0.615941			3.33254	0.568618			3.33254	0.513347
					3.33411	0.604096			3.33411	0.559141			3.33411	0.524506
					3.33568	0.592251			3.33568	0.568618			3.33568	0.513347
					3.33725	0.568561			3.33725	0.606526			3.33725	0.513347
					3.33883	0.544871			3.33883	0.597049			3.33883	0.502187
					3.3404	0.556716			3.3404	0.606526			3.3404	0.502187
					3.34197	0.580406			3.34197	0.634957			3.34197	0.513347
					3.34354	0.556716			3.34354	0.653911			3.34354	0.513347
					3.34511	0.533026			3.34511	0.663388			3.34511	0.502187
					3.34668	0.544871			3.34668	0.663388			3.34668	0.513347
					3.34826	0.521181			3.34826	0.701296			3.34826	0.513347
					3.34983	0.544871			3.34983	0.720249			3.34983	0.491027
					3.3514	0.533026			3.3514	0.701296			3.3514	0.546826
					3.35297	0.521181			3.35297	0.682342			3.35297	0.546826
					3.35454	0.533026			3.35454	0.710772			3.35454	0.557986
					3.35611	0.544871			3.35611	0.682342			3.35611	0.591465
					3.35769	0.544871			3.35769	0.672865			3.35769	0.647263
					3.35926	0.568561			3.35926	0.663388			3.35926	0.636104
					3.36083	0.604096			3.36083	0.672865			3.36083	0.658423
					3.3624	0.615941			3.3624	0.634957			3.3624	0.680742
					3.36397	0.615941			3.36397	0.634957			3.36397	0.714221
					3.36554	0.651477			3.36554	0.540187			3.36554	0.747701
					3.36711	0.675167			3.36711	0.502279			3.36711	0.714221
					3.36869	0.675167			3.36869	0.473848			3.36869	0.725381
					3.37026	0.651477			3.37026	0.454894			3.37026	0.703062
					3.37183	0.675167			3.37183	0.43594			3.37183	0.725381
					3.3734	0.675167			3.3734	0.43594			3.3734	0.725381
					3.37497	0.663322			3.37497	0.398033			3.37497	0.703062
					3.37654	0.687012			3.37654	0.454894			3.37654	0.703062
					3.37812	0.651477			3.37812	0.454894			3.37812	0.703062
					3.37969	0.651477			3.37969	0.445417			3.37969	0.647263
					3.38126	0.615941			3.38126	0.464371			3.38126	0.624944
					3.38283	0.604096			3.38283	0.483325			3.38283	0.602624
					3.3844	0.604096			3.3844	0.540187			3.3844	0.602624
					3.38597	0.615941			3.38597	0.559141			3.38597	0.569145
					3.38755	0.604096			3.38755	0.606526			3.38755	0.524506
					3.38912	0.627786			3.38912	0.644434			3.38912	0.546826
					3.39069	0.615941			3.39069	0.663388			3.39069	0.513347
					3.39226	0.651477			3.39226	0.682342			3.39226	0.535666
					3.39383	0.627786			3.39383	0.691819			3.39383	0.491027
					3.3954	0.615941			3.3954	0.701296			3.3954	0.535666
					3.39697	0.687012			3.39697	0.682342			3.39697	0.524506
					3.39855	0.627786			3.39855	0.720249			3.39855	0.502187
					3.40012	0.639631			3.40012	0.710772			3.40012	0.491027
					3.40169	0.675167			3.40169	0.710772			3.40169	0.502187
					3.40326	0.651477			3.40326	0.701296			3.40326	0.513347
					3.40483	0.639631			3.40483	0.663388			3.40483	0.491027
					3.4064	0.615941			3.4064	0.663388			3.4064	0.502187
					3.40798	0.627786			3.40798	0.663388			3.40798	0.502187
					3.40955	0.663322			3.40955	0.634957			3.40955	0.468708
					3.41112	0.663322			3.41112	0.634957			3.41112	0.479868
					3.41269	0.663322			3.41269	0.616003			3.41269	0.491027
					3.41426	0.698857			3.41426	0.616003			3.41426	0.479868
					3.41583	0.663322			3.41583	0.616003			3.41583	0.502187
					3.41741	0.675167			3.41741	0.616003			3.41741	0.524506
					3.41898	0.651477			3.41898	0.606526			3.41898	0.513347
					3.42055	0.639631			3.42055	0.62548			3.42055	0.513347
					3.42212	0.544871			3.42212	0.62548			3.42212	0.546826
					3.42369	0.450111			3.42369	0.616003			3.42369	0.557986
					3.42526	0.414576			3.42526	0.616003			3.42526	0.602624
					3.42683	0.343506			3.42683	0.606526			3.42683	0.580305
					3.42841	0.343506			3.42841	0.62548			3.42841	0.580305
					3.42998	0.331661			3.42998	0.616003			3.42998	0.613784
					3.43155	0.319816			3.43155	0.62548			3.43155	0.647263
					3.43312	0.307971			3.43312	0.62548			3.43312	0.669583
					3.43469	0.319816			3.43469	0.634957			3.43469	0.669583
					3.43626	0.343506			3.43626	0.62548			3.43626	0.691902
					3.43784	0.331661			3.43784	0.672865			3.43784	0.680742
					3.43941	0.343506			3.43941	0.663388			3.43941	0.647263
					3.44098	0.379041			3.44098	0.663388			3.44098	0.691902
					3.44255	0.379041			3.44255	0.672865			3.44255	0.669583
					3.44412	0.426421			3.44412	0.682342			3.44412	0.680742
					3.44569	0.473801			3.44569	0.672865			3.44569	0.680742
					3.44727	0.556716			3.44727	0.663388			3.44727	0.669583
					3.44884	0.568561			3.44884	0.672865			3.44884	0.669583
					3.45041	0.615941			3.45041	0.653911			3.45041	0.669583
					3.45198	0.604096			3.45198	0.663388			3.45198	0.669583
					3.45355	0.615941			3.45355	0.672865			3.45355	0.680742
					3.45512	0.639631			3.45512	0.672865			3.45512	0.680742
					3.45669	0.627786			3.45669	0.672865			3.45669	0.669583
					3.45827	0.663322			3.45827	0.653911			3.45827	0.658423
					3.45984	0.675167			3.45984	0.663388			3.45984	0.669583
					3.46141	0.663322			3.46141	0.663388			3.46141	0.680742
					3.46298	0.639631			3.46298	0.663388			3.46298	0.669583
					3.46455	0.675167			3.46455	0.663388			3.46455	0.613784
					3.46612	0.651477			3.46612	0.663388			3.46612	0.636104
					3.4677	0.663322			3.4677	0.653911			3.4677	0.602624
					3.46927	0.627786			3.46927	0.62548			3.46927	0.569145
					3.47084	0.627786			3.47084	0.634957			3.47084	0.591465
					3.47241	0.627786			3.47241	0.606526			3.47241	0.546826
					3.47398	0.639631			3.47398	0.616003			3.47398	0.580305
					3.47555	0.627786			3.47555	0.62548			3.47555	0.524506
					3.47713	0.639631			3.47713	0.616003			3.47713	0.524506
					3.4787	0.663322			3.4787	0.606526			3.4787	0.524506
					3.48027	0.663322			3.48027	0.606526			3.48027	0.524506
					3.48184	0.627786			3.48184	0.62548			3.48184	0.513347
					3.48341	0.627786			3.48341	0.62548			3.48341	0.524506
					3.48498	0.651477			3.48498	0.62548			3.48498	0.513347
					3.48655	0.639631			3.48655	0.597049			3.48655	0.513347
					3.48813	0.627786			3.48813	0.634957			3.48813	0.524506
					3.4897	0.627786			3.4897	0.653911			3.4897	0.513347
					3.49127	0.639631			3.49127	0.653911			3.49127	0.502187
					3.49284	0.663322			3.49284	0.653911			3.49284	0.524506
					3.49441	0.651477			3.49441	0.672865			3.49441	0.524506
					3.49598	0.627786			3.49598	0.663388			3.49598	0.524506
					3.49756	0.639631			3.49756	0.691819			3.49756	0.513347
					3.49913	0.627786			3.49913	0.672865			3.49913	0.524506
					3.5007	0.627786			3.5007	0.691819			3.5007	0.524506
					3.50227	0.639631			3.50227	0.701296			3.50227	0.535666
					3.50384	0.639631			3.50384	0.701296			3.50384	0.569145
					3.50541	0.627786			3.50541	0.710772			3.50541	0.591465
					3.50699	0.615941			3.50699	0.682342			3.50699	0.602624
					3.50856	0.639631			3.50856	0.710772			3.50856	0.602624
					3.51013	0.639631			3.51013	0.701296			3.51013	0.613784
					3.5117	0.627786			3.5117	0.682342			3.5117	0.624944
					3.51327	0.663322			3.51327	0.663388			3.51327	0.647263
					3.51484	0.651477			3.51484	0.663388			3.51484	0.658423
					3.51641	0.651477			3.51641	0.597049			3.51641	0.647263
					3.51799	0.639631			3.51799	0.568618			3.51799	0.658423
					3.51956	0.627786			3.51956	0.521233			3.51956	0.658423
					3.52113	0.627786			3.52113	0.464371			3.52113	0.680742
					3.5227	0.651477			3.5227	0.426463			3.5227	0.680742
					3.52427	0.651477			3.52427	0.416987			3.52427	0.658423
					3.52584	0.627786			3.52584	0.40751			3.52584	0.680742
					3.52742	0.615941			3.52742	0.398033			3.52742	0.647263
					3.52899	0.627786			3.52899	0.388556			3.52899	0.669583
					3.53056	0.663322			3.53056	0.369602			3.53056	0.680742
					3.53213	0.615941			3.53213	0.416987			3.53213	0.680742
					3.5337	0.639631			3.5337	0.426463			3.5337	0.658423
					3.53527	0.651477			3.53527	0.464371			3.53527	0.624944
					3.53685	0.651477			3.53685	0.502279			3.53685	0.613784
					3.53842	0.675167			3.53842	0.502279			3.53842	0.647263
					3.53999	0.639631			3.53999	0.597049			3.53999	0.647263
					3.54156	0.639631			3.54156	0.597049			3.54156	0.636104
					3.54313	0.651477			3.54313	0.663388			3.54313	0.613784
					3.5447	0.627786			3.5447	0.672865			3.5447	0.602624
					3.54628	0.639631			3.54628	0.682342			3.54628	0.557986
					3.54785	0.627786			3.54785	0.672865			3.54785	0.580305
					3.54942	0.663322			3.54942	0.682342			3.54942	0.580305
					3.55099	0.627786			3.55099	0.691819			3.55099	0.569145
					3.55256	0.675167			3.55256	0.701296			3.55256	0.569145
					3.55413	0.627786			3.55413	0.691819			3.55413	0.535666
					3.5557	0.651477			3.5557	0.691819			3.5557	0.535666
					3.55728	0.627786			3.55728	0.691819			3.55728	0.557986
					3.55885	0.663322			3.55885	0.672865			3.55885	0.546826
					3.56042	0.687012			3.56042	0.663388			3.56042	0.557986
					3.56199	0.663322			3.56199	0.634957			3.56199	0.546826
					3.56356	0.675167			3.56356	0.62548			3.56356	0.557986
					3.56513	0.663322			3.56513	0.587572			3.56513	0.557986
					3.56671	0.687012			3.56671	0.568618			3.56671	0.546826
					3.56828	0.663322			3.56828	0.53071			3.56828	0.569145
					3.56985	0.651477			3.56985	0.53071			3.56985	0.569145
					3.57142	0.687012			3.57142	0.492802			3.57142	0.569145
					3.57299	0.687012			3.57299	0.492802			3.57299	0.580305
					3.57456	0.675167			3.57456	0.473848			3.57456	0.569145
					3.57614	0.663322			3.57614	0.473848			3.57614	0.591465
					3.57771	0.698857			3.57771	0.483325			3.57771	0.591465
					3.57928	0.687012			3.57928	0.454894			3.57928	0.602624
					3.58085	0.651477			3.58085	0.483325			3.58085	0.624944
					3.58242	0.663322			3.58242	0.483325			3.58242	0.624944
					3.58399	0.651477			3.58399	0.502279			3.58399	0.658423
					3.58556	0.615941			3.58556	0.549664			3.58556	0.658423
					3.58714	0.651477			3.58714	0.578095			3.58714	0.636104
					3.58871	0.615941			3.58871	0.616003			3.58871	0.658423
					3.59028	0.615941			3.59028	0.653911			3.59028	0.647263
					3.59185	0.639631			3.59185	0.682342			3.59185	0.669583
					3.59342	0.615941			3.59342	0.691819			3.59342	0.691902
					3.59499	0.627786			3.59499	0.682342			3.59499	0.636104
					3.59657	0.615941			3.59657	0.672865			3.59657	0.669583
					3.59814	0.627786			3.59814	0.691819			3.59814	0.669583
					3.59971	0.639631			3.59971	0.701296			3.59971	0.669583
					3.60128	0.627786			3.60128	0.701296			3.60128	0.658423
					3.60285	0.615941			3.60285	0.682342			3.60285	0.669583
					3.60442	0.592251			3.60442	0.663388			3.60442	0.658423
					3.606	0.651477			3.606	0.691819			3.606	0.647263
					3.60757	0.663322			3.60757	0.701296			3.60757	0.658423
					3.60914	0.592251			3.60914	0.672865			3.60914	0.624944
					3.61071	0.615941			3.61071	0.701296			3.61071	0.647263
					3.61228	0.651477			3.61228	0.653911			3.61228	0.636104
					3.61385	0.651477			3.61385	0.672865			3.61385	0.602624
					3.61542	0.675167			3.61542	0.663388			3.61542	0.591465
					3.617	0.663322			3.617	0.682342			3.617	0.580305
					3.61857	0.687012			3.61857	0.710772			3.61857	0.580305
					3.62014	0.651477			3.62014	0.710772			3.62014	0.591465
					3.62171	0.675167			3.62171	0.672865			3.62171	0.569145
					3.62328	0.639631			3.62328	0.653911			3.62328	0.535666
					3.62485	0.580406			3.62485	0.682342			3.62485	0.546826
					3.62643	0.568561			3.62643	0.634957			3.62643	0.546826
					3.628	0.509336			3.628	0.62548			3.628	0.569145
					3.62957	0.450111			3.62957	0.587572			3.62957	0.557986
					3.63114	0.426421			3.63114	0.587572			3.63114	0.546826
					3.63271	0.426421			3.63271	0.578095			3.63271	0.557986
					3.63428	0.402731			3.63428	0.568618			3.63428	0.524506
					3.63586	0.426421			3.63586	0.549664			3.63586	0.557986
					3.63743	0.438266			3.63743	0.53071			3.63743	0.546826
					3.639	0.402731			3.639	0.549664			3.639	0.557986
					3.64057	0.509336			3.64057	0.53071			3.64057	0.535666
					3.64214	0.568561			3.64214	0.511756			3.64214	0.569145
					3.64371	0.615941			3.64371	0.578095			3.64371	0.557986
					3.64528	0.651477			3.64528	0.521233			3.64528	0.569145
					3.64686	0.639631			3.64686	0.53071			3.64686	0.580305
					3.64843	0.533026			3.64843	0.559141			3.64843	0.580305
					3.65	0.497491			3.65	0.568618			3.65	0.580305
					3.65157	0.450111			3.65157	0.62548			3.65157	0.613784
					3.65314	0.461956			3.65314	0.62548			3.65314	0.624944
					3.65471	0.497491			3.65471	0.663388			3.65471	0.636104
					3.65629	0.509336			3.65629	0.672865			3.65629	0.613784
					3.65786	0.533026			3.65786	0.701296			3.65786	0.658423
					3.65943	0.533026			3.65943	0.701296			3.65943	0.647263
					3.661	0.544871			3.661	0.682342			3.661	0.680742
					3.66257	0.544871			3.66257	0.682342			3.66257	0.691902
					3.66414	0.556716			3.66414	0.701296			3.66414	0.669583
					3.66572	0.592251			3.66572	0.682342			3.66572	0.691902
					3.66729	0.615941			3.66729	0.682342			3.66729	0.691902
					3.66886	0.639631			3.66886	0.720249			3.66886	0.703062
					3.67043	0.663322			3.67043	0.691819			3.67043	0.669583
					3.672	0.687012			3.672	0.663388			3.672	0.669583
					3.67357	0.663322			3.67357	0.663388			3.67357	0.680742
					3.67514	0.687012			3.67514	0.663388			3.67514	0.669583
					3.67672	0.710702			3.67672	0.663388			3.67672	0.624944
					3.67829	0.698857			3.67829	0.644434			3.67829	0.602624
					3.67986	0.710702			3.67986	0.653911			3.67986	0.591465
					3.68143	0.675167			3.68143	0.663388			3.68143	0.591465
					3.683	0.627786			3.683	0.62548			3.683	0.535666
					3.68457	0.556716			3.68457	0.616003			3.68457	0.535666
					3.68615	0.485646			3.68615	0.644434			3.68615	0.557986
					3.68772	0.450111			3.68772	0.634957			3.68772	0.524506
					3.68929	0.426421			3.68929	0.634957			3.68929	0.557986
					3.69086	0.390886			3.69086	0.62548			3.69086	0.513347
					3.69243	0.379041			3.69243	0.634957			3.69243	0.546826
					3.694	0.355351			3.694	0.62548			3.694	0.524506
					3.69558	0.319816			3.69558	0.634957			3.69558	0.546826
					3.69715	0.355351			3.69715	0.644434			3.69715	0.513347
					3.69872	0.343506			3.69872	0.663388			3.69872	0.524506
					3.70029	0.343506			3.70029	0.653911			3.70029	0.513347
					3.70186	0.414576			3.70186	0.663388			3.70186	0.513347
					3.70343	0.461956			3.70343	0.672865			3.70343	0.502187
					3.705	0.604096			3.705	0.672865			3.705	0.524506
					3.70658	0.627786			3.70658	0.682342			3.70658	0.513347
					3.70815	0.639631			3.70815	0.644434			3.70815	0.524506
					3.70972	0.687012			3.70972	0.672865			3.70972	0.524506
					3.71129	0.687012			3.71129	0.653911			3.71129	0.546826
					3.71286	0.651477			3.71286	0.682342			3.71286	0.535666
					3.71443	0.627786			3.71443	0.682342			3.71443	0.535666
					3.71601	0.675167			3.71601	0.663388			3.71601	0.535666
					3.71758	0.663322			3.71758	0.663388			3.71758	0.591465
					3.71915	0.675167			3.71915	0.663388			3.71915	0.613784
					3.72072	0.651477			3.72072	0.653911			3.72072	0.647263
					3.72229	0.675167			3.72229	0.653911			3.72229	0.647263
					3.72386	0.710702			3.72386	0.634957			3.72386	0.669583
					3.72544	0.687012			3.72544	0.62548			3.72544	0.680742
					3.72701	0.663322			3.72701	0.644434			3.72701	0.725381
					3.72858	0.663322			3.72858	0.616003			3.72858	0.736541
					3.73015	0.663322			3.73015	0.62548			3.73015	0.747701
					3.73172	0.651477			3.73172	0.634957			3.73172	0.703062
					3.73329	0.675167			3.73329	0.62548			3.73329	0.680742
					3.73486	0.675167			3.73486	0.634957			3.73486	0.636104
					3.73644	0.651477			3.73644	0.62548			3.73644	0.636104
					3.73801	0.651477			3.73801	0.62548			3.73801	0.602624
					3.73958	0.663322			3.73958	0.634957			3.73958	0.580305
					3.74115	0.651477			3.74115	0.62548			3.74115	0.557986
					3.74272	0.592251			3.74272	0.587572			3.74272	0.524506
					3.74429	0.568561			3.74429	0.616003			3.74429	0.524506
					3.74587	0.544871			3.74587	0.644434			3.74587	0.524506
					3.74744	0.521181			3.74744	0.634957			3.74744	0.524506
					3.74901	0.509336			3.74901	0.663388			3.74901	0.513347
					3.75058	0.509336			3.75058	0.672865			3.75058	0.524506
					3.75215	0.556716			3.75215	0.672865			3.75215	0.524506
					3.75372	0.556716			3.75372	0.653911			3.75372	0.513347
					3.7553	0.556716			3.7553	0.701296			3.7553	0.524506
					3.75687	0.568561			3.75687	0.710772			3.75687	0.513347
					3.75844	0.544871			3.75844	0.729726			3.75844	0.513347
					3.76001	0.568561			3.76001	0.701296			3.76001	0.502187
					3.76158	0.556716			3.76158	0.691819			3.76158	0.513347
					3.76315	0.461956			3.76315	0.682342			3.76315	0.524506
					3.76472	0.533026			3.76472	0.701296			3.76472	0.524506
					3.7663	0.509336			3.7663	0.682342			3.7663	0.502187
					3.76787	0.497491			3.76787	0.701296			3.76787	0.491027
					3.76944	0.509336			3.76944	0.62548			3.76944	0.479868
					3.77101	0.533026			3.77101	0.634957			3.77101	0.513347
					3.77258	0.580406			3.77258	0.62548			3.77258	0.513347
					3.77415	0.627786			3.77415	0.606526			3.77415	0.524506
					3.77573	0.698857			3.77573	0.587572			3.77573	0.535666
					3.7773	0.675167			3.7773	0.587572			3.7773	0.524506
					3.77887	0.698857			3.77887	0.578095			3.77887	0.557986
					3.78044	0.687012			3.78044	0.587572			3.78044	0.613784
					3.78201	0.675167			3.78201	0.549664			3.78201	0.624944
					3.78358	0.687012			3.78358	0.559141			3.78358	0.647263
					3.78516	0.663322			3.78516	0.559141			3.78516	0.691902
					3.78673	0.675167			3.78673	0.549664			3.78673	0.680742
					3.7883	0.675167			3.7883	0.568618			3.7883	0.680742
					3.78987	0.675167			3.78987	0.53071			3.78987	0.680742
					3.79144	0.675167			3.79144	0.578095			3.79144	0.680742
					3.79301	0.675167			3.79301	0.578095			3.79301	0.703062
					3.79459	0.651477			3.79459	0.597049			3.79459	0.680742
					3.79616	0.663322			3.79616	0.634957			3.79616	0.680742
					3.79773	0.663322			3.79773	0.644434			3.79773	0.680742
					3.7993	0.651477			3.7993	0.644434			3.7993	0.669583
					3.80087	0.639631			3.80087	0.644434			3.80087	0.658423
					3.80244	0.675167			3.80244	0.672865			3.80244	0.658423
					3.80401	0.639631			3.80401	0.672865			3.80401	0.669583
					3.80559	0.615941			3.80559	0.663388			3.80559	0.658423
					3.80716	0.615941			3.80716	0.672865			3.80716	0.636104
					3.80873	0.627786			3.80873	0.672865			3.80873	0.580305
					3.8103	0.663322			3.8103	0.682342			3.8103	0.591465
					3.81187	0.615941			3.81187	0.672865			3.81187	0.580305
					3.81344	0.639631			3.81344	0.663388			3.81344	0.580305
					3.81502	0.627786			3.81502	0.663388			3.81502	0.591465
					3.81659	0.639631			3.81659	0.653911			3.81659	0.591465
					3.81816	0.651477			3.81816	0.663388			3.81816	0.535666
					3.81973	0.639631			3.81973	0.672865			3.81973	0.535666
					3.8213	0.615941			3.8213	0.672865			3.8213	0.546826
					3.82287	0.627786			3.82287	0.691819			3.82287	0.546826
					3.82445	0.604096			3.82445	0.691819			3.82445	0.546826
					3.82602	0.651477			3.82602	0.672865			3.82602	0.557986
					3.82759	0.627786			3.82759	0.691819			3.82759	0.546826
					3.82916	0.651477			3.82916	0.672865			3.82916	0.535666
					3.83073	0.663322			3.83073	0.691819			3.83073	0.557986
					3.8323	0.675167			3.8323	0.663388			3.8323	0.546826
					3.83387	0.675167			3.83387	0.606526			3.83387	0.546826
					3.83545	0.663322			3.83545	0.597049			3.83545	0.546826
					3.83702	0.627786			3.83702	0.568618			3.83702	0.546826
					3.83859	0.651477			3.83859	0.53071			3.83859	0.546826
					3.84016	0.663322			3.84016	0.483325			3.84016	0.535666
					3.84173	0.675167			3.84173	0.426463			3.84173	0.557986
					3.8433	0.687012			3.8433	0.398033			3.8433	0.580305
					3.84488	0.663322			3.84488	0.398033			3.84488	0.557986
					3.84645	0.698857			3.84645	0.388556			3.84645	0.557986
					3.84802	0.639631			3.84802	0.388556			3.84802	0.580305
					3.84959	0.687012			3.84959	0.398033			3.84959	0.591465
					3.85116	0.627786			3.85116	0.416987			3.85116	0.602624
					3.85273	0.615941			3.85273	0.426463			3.85273	0.602624
					3.85431	0.651477			3.85431	0.426463			3.85431	0.636104
					3.85588	0.592251			3.85588	0.454894			3.85588	0.658423
					3.85745	0.627786			3.85745	0.53071			3.85745	0.658423
					3.85902	0.663322			3.85902	0.578095			3.85902	0.691902
					3.86059	0.651477			3.86059	0.62548			3.86059	0.669583
					3.86216	0.663322			3.86216	0.644434			3.86216	0.658423
					3.86373	0.627786			3.86373	0.682342			3.86373	0.680742
					3.86531	0.651477			3.86531	0.701296			3.86531	0.680742
					3.86688	0.615941			3.86688	0.682342			3.86688	0.680742
					3.86845	0.604096			3.86845	0.701296			3.86845	0.691902
					3.87002	0.627786			3.87002	0.701296			3.87002	0.691902
					3.87159	0.627786			3.87159	0.691819			3.87159	0.691902
					3.87316	0.651477			3.87316	0.672865			3.87316	0.680742
					3.87474	0.663322			3.87474	0.663388			3.87474	0.669583
					3.87631	0.675167			3.87631	0.663388			3.87631	0.680742
					3.87788	0.639631			3.87788	0.663388			3.87788	0.658423
					3.87945	0.687012			3.87945	0.634957			3.87945	0.658423
					3.88102	0.698857			3.88102	0.62548			3.88102	0.658423
					3.88259	0.675167			3.88259	0.62548			3.88259	0.658423
					3.88417	0.675167			3.88417	0.634957			3.88417	0.647263
					3.88574	0.651477			3.88574	0.606526			3.88574	0.647263
					3.88731	0.663322			3.88731	0.62548			3.88731	0.647263
					3.88888	0.663322			3.88888	0.606526			3.88888	0.602624
					3.89045	0.675167			3.89045	0.616003			3.89045	0.591465
					3.89202	0.627786			3.89202	0.616003			3.89202	0.569145
					3.89359	0.651477			3.89359	0.606526			3.89359	0.580305
					3.89517	0.675167			3.89517	0.606526			3.89517	0.569145
					3.89674	0.627786			3.89674	0.616003			3.89674	0.569145
					3.89831	0.687012			3.89831	0.606526			3.89831	0.535666
					3.89988	0.675167			3.89988	0.62548			3.89988	0.557986
					3.90145	0.651477			3.90145	0.62548			3.90145	0.535666
					3.90302	0.663322			3.90302	0.62548			3.90302	0.513347
					3.9046	0.663322			3.9046	0.653911			3.9046	0.535666
					3.90617	0.675167			3.90617	0.672865			3.90617	0.513347
					3.90774	0.687012			3.90774	0.663388			3.90774	0.535666
					3.90931	0.675167			3.90931	0.653911			3.90931	0.513347
					3.91088	0.651477			3.91088	0.672865			3.91088	0.513347
					3.91245	0.663322			3.91245	0.682342			3.91245	0.502187
					3.91403	0.639631			3.91403	0.663388			3.91403	0.524506
					3.9156	0.639631			3.9156	0.682342			3.9156	0.524506
					3.91717	0.639631			3.91717	0.691819			3.91717	0.535666
					3.91874	0.663322			3.91874	0.682342			3.91874	0.524506
					3.92031	0.627786			3.92031	0.653911			3.92031	0.524506
					3.92188	0.639631			3.92188	0.663388			3.92188	0.524506
					3.92345	0.639631			3.92345	0.653911			3.92345	0.535666
					3.92503	0.639631			3.92503	0.644434			3.92503	0.524506
					3.9266	0.627786			3.9266	0.663388			3.9266	0.524506
					3.92817	0.627786			3.92817	0.653911			3.92817	0.546826
					3.92974	0.627786			3.92974	0.663388			3.92974	0.524506
					3.93131	0.651477			3.93131	0.62548			3.93131	0.535666
					3.93288	0.639631			3.93288	0.634957			3.93288	0.569145
					3.93446	0.687012			3.93446	0.634957			3.93446	0.591465
					3.93603	0.627786			3.93603	0.62548			3.93603	0.602624
					3.9376	0.639631			3.9376	0.616003			3.9376	0.602624
					3.93917	0.675167			3.93917	0.597049			3.93917	0.613784
					3.94074	0.627786			3.94074	0.616003			3.94074	0.647263
					3.94231	0.651477			3.94231	0.634957			3.94231	0.647263
					3.94389	0.663322			3.94389	0.634957			3.94389	0.669583
					3.94546	0.639631			3.94546	0.62548			3.94546	0.669583
					3.94703	0.639631			3.94703	0.62548			3.94703	0.714221
					3.9486	0.639631			3.9486	0.644434			3.9486	0.714221
					3.95017	0.615941			3.95017	0.644434			3.95017	0.714221
					3.95174	0.639631			3.95174	0.616003			3.95174	0.714221
					3.95331	0.627786			3.95331	0.672865			3.95331	0.703062
					3.95489	0.663322			3.95489	0.663388			3.95489	0.669583
					3.95646	0.663322			3.95646	0.672865			3.95646	0.669583
					3.95803	0.639631			3.95803	0.682342			3.95803	0.636104
					3.9596	0.651477			3.9596	0.682342			3.9596	0.613784
					3.96117	0.675167			3.96117	0.682342			3.96117	0.591465
					3.96274	0.675167			3.96274	0.691819			3.96274	0.557986
					3.96432	0.663322			3.96432	0.701296			3.96432	0.557986
					3.96589	0.651477			3.96589	0.691819			3.96589	0.524506
					3.96746	0.639631			3.96746	0.691819			3.96746	0.524506
					3.96903	0.615941			3.96903	0.663388			3.96903	0.513347
					3.9706	0.615941			3.9706	0.606526			3.9706	0.524506
					3.97217	0.438266			3.97217	0.568618			3.97217	0.524506
					3.97375	0.331661			3.97375	0.53071			3.97375	0.535666
					3.97532	0.260591			3.97532	0.502279			3.97532	0.524506
					3.97689	0.272436			3.97689	0.492802			3.97689	0.513347
					3.97846	0.307971			3.97846	0.445417			3.97846	0.524506
					3.98003	0.307971			3.98003	0.40751			3.98003	0.513347
					3.9816	0.331661			3.9816	0.398033			3.9816	0.502187
					3.98317	0.331661			3.98317	0.426463			3.98317	0.513347
					3.98475	0.307971			3.98475	0.445417			3.98475	0.513347
					3.98632	0.260591			3.98632	0.445417			3.98632	0.468708
					3.98789	0.260591			3.98789	0.454894			3.98789	0.513347
					3.98946	0.272436			3.98946	0.473848			3.98946	0.513347
					3.99103	0.319816			3.99103	0.521233			3.99103	0.502187
					3.9926	0.580406			3.9926	0.559141			3.9926	0.502187
					3.99418	0.651477			3.99418	0.62548			3.99418	0.535666
					3.99575	0.687012			3.99575	0.644434			3.99575	0.524506
					3.99732	0.687012			3.99732	0.663388			3.99732	0.546826
					3.99889	0.651477			3.99889	0.682342			3.99889	0.546826
					4.00046	0.687012			4.00046	0.691819			4.00046	0.591465
					4.00203	0.698857			4.00203	0.691819			4.00203	0.602624
					4.00361	0.663322			4.00361	0.691819			4.00361	0.624944
					4.00518	0.687012			4.00518	0.691819			4.00518	0.636104
					4.00675	0.639631			4.00675	0.710772			4.00675	0.647263
					4.00832	0.687012			4.00832	0.691819			4.00832	0.669583
					4.00989	0.663322			4.00989	0.701296			4.00989	0.680742
					4.01146	0.663322			4.01146	0.691819			4.01146	0.703062
					4.01303	0.639631			4.01303	0.701296			4.01303	0.680742
					4.01461	0.651477			4.01461	0.710772			4.01461	0.680742
					4.01618	0.663322			4.01618	0.663388			4.01618	0.658423
					4.01775	0.663322			4.01775	0.672865			4.01775	0.691902
					4.01932	0.639631			4.01932	0.663388			4.01932	0.658423
					4.02089	0.651477			4.02089	0.616003			4.02089	0.680742
					4.02246	0.651477			4.02246	0.606526			4.02246	0.680742
					4.02404	0.663322			4.02404	0.597049			4.02404	0.680742
					4.02561	0.698857			4.02561	0.568618			4.02561	0.680742
					4.02718	0.663322			4.02718	0.568618			4.02718	0.669583
					4.02875	0.687012			4.02875	0.53071			4.02875	0.669583
					4.03032	0.651477			4.03032	0.559141			4.03032	0.624944
					4.03189	0.663322			4.03189	0.53071			4.03189	0.647263
					4.03347	0.687012			4.03347	0.53071			4.03347	0.624944
					4.03504	0.675167			4.03504	0.53071			4.03504	0.647263
					4.03661	0.687012			4.03661	0.53071			4.03661	0.624944
					4.03818	0.675167			4.03818	0.521233			4.03818	0.624944
					4.03975	0.663322			4.03975	0.568618			4.03975	0.602624
					4.04132	0.663322			4.04132	0.549664			4.04132	0.557986
					4.04289	0.639631			4.04289	0.568618			4.04289	0.591465
					4.04447	0.639631			4.04447	0.578095			4.04447	0.624944
					4.04604	0.627786			4.04604	0.62548			4.04604	0.602624
					4.04761	0.627786			4.04761	0.634957			4.04761	0.613784
					4.04918	0.615941			4.04918	0.653911			4.04918	0.546826
					4.05075	0.651477			4.05075	0.672865			4.05075	0.591465
					4.05232	0.639631			4.05232	0.663388			4.05232	0.569145
					4.0539	0.675167			4.0539	0.701296			4.0539	0.569145
					4.05547	0.675167			4.05547	0.682342			4.05547	0.580305
					4.05704	0.651477			4.05704	0.691819			4.05704	0.569145
					4.05861	0.675167			4.05861	0.672865			4.05861	0.557986
					4.06018	0.675167			4.06018	0.691819			4.06018	0.580305
					4.06175	0.651477			4.06175	0.710772			4.06175	0.569145
					4.06333	0.639631			4.06333	0.710772			4.06333	0.557986
					4.0649	0.675167			4.0649	0.691819			4.0649	0.580305
					4.06647	0.675167			4.06647	0.720249			4.06647	0.569145
					4.06804	0.651477			4.06804	0.691819			4.06804	0.591465
					4.06961	0.663322			4.06961	0.682342			4.06961	0.602624
					4.07118	0.663322			4.07118	0.663388			4.07118	0.613784
					4.07276	0.651477			4.07276	0.663388			4.07276	0.591465
					4.07433	0.675167			4.07433	0.644434			4.07433	0.602624
					4.0759	0.663322			4.0759	0.559141			4.0759	0.602624
					4.07747	0.663322			4.07747	0.578095			4.07747	0.624944
					4.07904	0.639631			4.07904	0.483325			4.07904	0.658423
					4.08061	0.651477			4.08061	0.502279			4.08061	0.669583
					4.08218	0.675167			4.08218	0.492802			4.08218	0.636104
					4.08376	0.639631			4.08376	0.473848			4.08376	0.647263
					4.08533	0.639631			4.08533	0.473848			4.08533	0.636104
					4.0869	0.639631			4.0869	0.483325			4.0869	0.669583
					4.08847	0.627786			4.08847	0.454894			4.08847	0.647263
					4.09004	0.615941			4.09004	0.473848			4.09004	0.647263
					4.09161	0.639631			4.09161	0.473848			4.09161	0.658423
					4.09319	0.615941			4.09319	0.511756			4.09319	0.680742
					4.09476	0.663322			4.09476	0.521233			4.09476	0.669583
					4.09633	0.663322			4.09633	0.568618			4.09633	0.647263
					4.0979	0.639631			4.0979	0.559141			4.0979	0.680742
					4.09947	0.639631			4.09947	0.644434			4.09947	0.658423
					4.10104	0.675167			4.10104	0.653911			4.10104	0.658423
					4.10262	0.651477			4.10262	0.672865			4.10262	0.647263
					4.10419	0.651477			4.10419	0.682342			4.10419	0.636104
					4.10576	0.639631			4.10576	0.682342			4.10576	0.647263
					4.10733	0.615941			4.10733	0.710772			4.10733	0.658423
					4.1089	0.639631			4.1089	0.710772			4.1089	0.636104
					4.11047	0.651477			4.11047	0.701296			4.11047	0.658423
					4.11204	0.651477			4.11204	0.701296			4.11204	0.647263
					4.11362	0.604096			4.11362	0.691819			4.11362	0.636104
					4.11519	0.639631			4.11519	0.663388			4.11519	0.602624
					4.11676	0.627786			4.11676	0.691819			4.11676	0.602624
					4.11833	0.615941			4.11833	0.663388			4.11833	0.624944
					4.1199	0.615941			4.1199	0.672865			4.1199	0.602624
					4.12147	0.663322			4.12147	0.653911			4.12147	0.569145
					4.12305	0.651477			4.12305	0.644434			4.12305	0.580305
					4.12462	0.627786			4.12462	0.644434			4.12462	0.569145
					4.12619	0.651477			4.12619	0.62548			4.12619	0.557986
					4.12776	0.627786			4.12776	0.62548			4.12776	0.557986
					4.12933	0.615941			4.12933	0.62548			4.12933	0.569145
					4.1309	0.639631			4.1309	0.597049			4.1309	0.569145
					4.13248	0.639631			4.13248	0.587572			4.13248	0.546826
					4.13405	0.675167			4.13405	0.578095			4.13405	0.557986
					4.13562	0.651477			4.13562	0.578095			4.13562	0.569145
					4.13719	0.651477			4.13719	0.568618			4.13719	0.557986
					4.13876	0.627786			4.13876	0.568618			4.13876	0.569145
					4.14033	0.687012			4.14033	0.578095			4.14033	0.569145
					4.1419	0.615941			4.1419	0.587572			4.1419	0.557986
					4.14348	0.663322			4.14348	0.587572			4.14348	0.569145
					4.14505	0.687012			4.14505	0.587572			4.14505	0.580305
					4.14662	0.639631			4.14662	0.616003			4.14662	0.569145
					4.14819	0.651477			4.14819	0.634957			4.14819	0.569145
					4.14976	0.651477			4.14976	0.634957			4.14976	0.591465
					4.15133	0.663322			4.15133	0.672865			4.15133	0.602624
					4.15291	0.663322			4.15291	0.663388			4.15291	0.580305
					4.15448	0.675167			4.15448	0.682342			4.15448	0.613784
					4.15605	0.615941			4.15605	0.672865			4.15605	0.613784
					4.15762	0.651477			4.15762	0.682342			4.15762	0.624944
					4.15919	0.627786			4.15919	0.691819			4.15919	0.658423
					4.16076	0.639631			4.16076	0.682342			4.16076	0.647263
					4.16234	0.639631			4.16234	0.682342			4.16234	0.647263
					4.16391	0.627786			4.16391	0.663388			4.16391	0.636104
					4.16548	0.663322			4.16548	0.682342			4.16548	0.658423
					4.16705	0.639631			4.16705	0.663388			4.16705	0.647263
					4.16862	0.651477			4.16862	0.653911			4.16862	0.658423
					4.17019	0.675167			4.17019	0.644434			4.17019	0.669583
					4.17176	0.627786			4.17176	0.653911			4.17176	0.691902
					4.17334	0.615941			4.17334	0.672865			4.17334	0.680742
					4.17491	0.663322			4.17491	0.663388			4.17491	0.647263
					4.17648	0.627786			4.17648	0.672865			4.17648	0.647263
					4.17805	0.651477			4.17805	0.682342			4.17805	0.658423
					4.17962	0.651477			4.17962	0.663388			4.17962	0.669583
					4.18119	0.604096			4.18119	0.682342			4.18119	0.647263
					4.18277	0.639631			4.18277	0.653911			4.18277	0.636104
					4.18434	0.639631			4.18434	0.663388			4.18434	0.647263
					4.18591	0.639631			4.18591	0.663388			4.18591	0.613784
					4.18748	0.651477			4.18748	0.672865			4.18748	0.624944
					4.18905	0.651477			4.18905	0.62548			4.18905	0.613784
					4.19062	0.675167			4.19062	0.597049			4.19062	0.602624
					4.1922	0.639631			4.1922	0.597049			4.1922	0.591465
					4.19377	0.639631			4.19377	0.587572			4.19377	0.591465
					4.19534	0.639631			4.19534	0.616003			4.19534	0.580305
					4.19691	0.639631			4.19691	0.587572			4.19691	0.591465
					4.19848	0.615941			4.19848	0.578095			4.19848	0.591465
					4.20005	0.615941			4.20005	0.578095			4.20005	0.580305
					4.20162	0.639631			4.20162	0.578095			4.20162	0.535666
					4.2032	0.639631			4.2032	0.587572			4.2032	0.591465
					4.20477	0.675167			4.20477	0.578095			4.20477	0.580305
					4.20634	0.675167			4.20634	0.578095			4.20634	0.557986
					4.20791	0.651477			4.20791	0.597049			4.20791	0.591465
					4.20948	0.627786			4.20948	0.578095			4.20948	0.580305
					4.21105	0.615941			4.21105	0.616003			4.21105	0.580305
					4.21263	0.663322			4.21263	0.616003			4.21263	0.591465
					4.2142	0.663322			4.2142	0.653911			4.2142	0.569145
					4.21577	0.639631			4.21577	0.644434			4.21577	0.580305
					4.21734	0.651477			4.21734	0.653911			4.21734	0.580305
					4.21891	0.651477			4.21891	0.672865			4.21891	0.580305
					4.22048	0.651477			4.22048	0.672865			4.22048	0.591465
					4.22206	0.627786			4.22206	0.682342			4.22206	0.591465
					4.22363	0.639631			4.22363	0.663388			4.22363	0.602624
					4.2252	0.651477			4.2252	0.682342			4.2252	0.624944
					4.22677	0.651477			4.22677	0.663388			4.22677	0.624944
					4.22834	0.675167			4.22834	0.691819			4.22834	0.624944
					4.22991	0.675167			4.22991	0.663388			4.22991	0.613784
					4.23148	0.639631			4.23148	0.672865			4.23148	0.624944
					4.23306	0.651477			4.23306	0.672865			4.23306	0.624944
					4.23463	0.651477			4.23463	0.672865			4.23463	0.636104
					4.2362	0.651477			4.2362	0.672865			4.2362	0.624944
					4.23777	0.663322			4.23777	0.672865			4.23777	0.658423
					4.23934	0.639631			4.23934	0.663388			4.23934	0.636104
					4.24091	0.639631			4.24091	0.672865			4.24091	0.658423
					4.24249	0.698857			4.24249	0.691819			4.24249	0.658423
					4.24406	0.687012			4.24406	0.691819			4.24406	0.636104
					4.24563	0.698857			4.24563	0.672865			4.24563	0.658423
					4.2472	0.651477			4.2472	0.701296			4.2472	0.624944
					4.24877	0.687012			4.24877	0.691819			4.24877	0.658423
					4.25034	0.651477			4.25034	0.653911			4.25034	0.647263
					4.25192	0.651477			4.25192	0.672865			4.25192	0.658423
					4.25349	0.651477			4.25349	0.606526			4.25349	0.658423
					4.25506	0.663322			4.25506	0.587572			4.25506	0.658423
					4.25663	0.675167			4.25663	0.53071			4.25663	0.658423
					4.2582	0.675167			4.2582	0.483325			4.2582	0.669583
					4.25977	0.687012			4.25977	0.43594			4.25977	0.658423
					4.26134	0.687012			4.26134	0.40751			4.26134	0.669583
					4.26292	0.651477			4.26292	0.40751			4.26292	0.647263
					4.26449	0.675167			4.26449	0.40751			4.26449	0.658423
					4.26606	0.663322			4.26606	0.426463			4.26606	0.658423
					4.26763	0.675167			4.26763	0.43594			4.26763	0.669583
					4.2692	0.663322			4.2692	0.416987			4.2692	0.669583
					4.27077	0.663322			4.27077	0.426463			4.27077	0.669583
					4.27235	0.675167			4.27235	0.43594			4.27235	0.658423
					4.27392	0.651477			4.27392	0.464371			4.27392	0.658423
					4.27549	0.639631			4.27549	0.492802			4.27549	0.658423
					4.27706	0.651477			4.27706	0.578095			4.27706	0.669583
					4.27863	0.687012			4.27863	0.597049			4.27863	0.680742
					4.2802	0.651477			4.2802	0.653911			4.2802	0.658423
					4.28178	0.639631			4.28178	0.634957			4.28178	0.669583
					4.28335	0.651477			4.28335	0.634957			4.28335	0.658423
					4.28492	0.651477			4.28492	0.672865			4.28492	0.647263
					4.28649	0.627786			4.28649	0.691819			4.28649	0.647263
					4.28806	0.627786			4.28806	0.691819			4.28806	0.658423
					4.28963	0.615941			4.28963	0.672865			4.28963	0.636104
					4.2912	0.675167			4.2912	0.682342			4.2912	0.658423
					4.29278	0.627786			4.29278	0.663388			4.29278	0.647263
					4.29435	0.639631			4.29435	0.672865			4.29435	0.613784
					4.29592	0.663322			4.29592	0.663388			4.29592	0.647263
					4.29749	0.651477			4.29749	0.691819			4.29749	0.591465
					4.29906	0.627786			4.29906	0.653911			4.29906	0.580305
					4.30063	0.627786			4.30063	0.682342			4.30063	0.602624
					4.30221	0.651477			4.30221	0.691819			4.30221	0.591465
					4.30378	0.651477			4.30378	0.663388			4.30378	0.569145
					4.30535	0.615941			4.30535	0.644434			4.30535	0.557986
					4.30692	0.639631			4.30692	0.644434			4.30692	0.557986
					4.30849	0.615941			4.30849	0.644434			4.30849	0.546826
					4.31006	0.615941			4.31006	0.606526			4.31006	0.557986
					4.31164	0.592251			4.31164	0.587572			4.31164	0.546826
					4.31321	0.580406			4.31321	0.492802			4.31321	0.546826
					4.31478	0.604096			4.31478	0.473848			4.31478	0.557986
					4.31635	0.580406			4.31635	0.445417			4.31635	0.557986
					4.31792	0.580406			4.31792	0.445417			4.31792	0.535666
					4.31949	0.556716			4.31949	0.416987			4.31949	0.546826
					4.32107	0.568561			4.32107	0.416987			4.32107	0.546826
					4.32264	0.592251			4.32264	0.426463			4.32264	0.557986
					4.32421	0.604096			4.32421	0.416987			4.32421	0.557986
					4.32578	0.604096			4.32578	0.416987			4.32578	0.557986
					4.32735	0.604096			4.32735	0.416987			4.32735	0.557986
					4.32892	0.604096			4.32892	0.426463			4.32892	0.569145
					4.33049	0.627786			4.33049	0.473848			4.33049	0.546826
					4.33207	0.663322			4.33207	0.540187			4.33207	0.535666
					4.33364	0.663322			4.33364	0.549664			4.33364	0.557986
					4.33521	0.627786			4.33521	0.62548			4.33521	0.591465
					4.33678	0.663322			4.33678	0.62548			4.33678	0.613784
					4.33835	0.663322			4.33835	0.653911			4.33835	0.636104
					4.33992	0.651477			4.33992	0.701296			4.33992	0.669583
					4.3415	0.663322			4.3415	0.710772			4.3415	0.691902
					4.34307	0.663322			4.34307	0.701296			4.34307	0.703062
					4.34464	0.675167			4.34464	0.691819			4.34464	0.714221
					4.34621	0.663322			4.34621	0.710772			4.34621	0.725381
					4.34778	0.675167			4.34778	0.682342			4.34778	0.736541
					4.34935	0.687012			4.34935	0.663388			4.34935	0.747701
					4.35093	0.651477			4.35093	0.634957			4.35093	0.747701
					4.3525	0.639631			4.3525	0.644434			4.3525	0.75886
					4.35407	0.651477			4.35407	0.644434			4.35407	0.747701
					4.35564	0.675167			4.35564	0.634957			4.35564	0.725381
					4.35721	0.663322			4.35721	0.644434			4.35721	0.669583
					4.35878	0.627786			4.35878	0.644434			4.35878	0.680742
					4.36035	0.651477			4.36035	0.634957			4.36035	0.658423
					4.36193	0.639631			4.36193	0.616003			4.36193	0.591465
					4.3635	0.651477			4.3635	0.616003			4.3635	0.546826
					4.36507	0.687012			4.36507	0.62548			4.36507	0.491027
					4.36664	0.651477			4.36664	0.616003			4.36664	0.502187
					4.36821	0.698857			4.36821	0.606526			4.36821	0.468708
					4.36978	0.663322			4.36978	0.616003			4.36978	0.457548
					4.37136	0.663322			4.37136	0.616003			4.37136	0.457548
					4.37293	0.651477			4.37293	0.62548			4.37293	0.457548
					4.3745	0.639631			4.3745	0.644434			4.3745	0.457548
					4.37607	0.698857			4.37607	0.644434			4.37607	0.468708
					4.37764	0.651477			4.37764	0.653911			4.37764	0.468708
					4.37921	0.663322			4.37921	0.653911			4.37921	0.479868
					4.38079	0.627786			4.38079	0.691819			4.38079	0.457548
					4.38236	0.651477			4.38236	0.663388			4.38236	0.457548
					4.38393	0.639631			4.38393	0.663388			4.38393	0.446388
					4.3855	0.663322			4.3855	0.653911			4.3855	0.446388
					4.38707	0.627786			4.38707	0.691819			4.38707	0.446388
					4.38864	0.639631			4.38864	0.691819			4.38864	0.491027
					4.39021	0.651477			4.39021	0.672865			4.39021	0.457548
					4.39179	0.639631			4.39179	0.653911			4.39179	0.446388
					4.39336	0.627786			4.39336	0.634957			4.39336	0.435229
					4.39493	0.651477			4.39493	0.634957			4.39493	0.446388
					4.3965	0.627786			4.3965	0.568618			4.3965	0.446388
					4.39807	0.651477			4.39807	0.568618			4.39807	0.468708
					4.39964	0.639631			4.39964	0.559141			4.39964	0.491027
					4.40122	0.651477			4.40122	0.549664			4.40122	0.479868
					4.40279	0.627786			4.40279	0.521233			4.40279	0.491027
					4.40436	0.639631			4.40436	0.549664			4.40436	0.513347
					4.40593	0.627786			4.40593	0.53071			4.40593	0.502187
					4.4075	0.627786			4.4075	0.540187			4.4075	0.502187
					4.40907	0.639631			4.40907	0.559141			4.40907	0.502187
					4.41065	0.639631			4.41065	0.559141			4.41065	0.524506
					4.41222	0.615941			4.41222	0.540187			4.41222	0.524506
					4.41379	0.627786			4.41379	0.53071			4.41379	0.513347
					4.41536	0.615941			4.41536	0.568618			4.41536	0.535666
					4.41693	0.639631			4.41693	0.597049			4.41693	0.502187
					4.4185	0.639631			4.4185	0.62548			4.4185	0.491027
					4.42007	0.639631			4.42007	0.644434			4.42007	0.524506
					4.42165	0.627786			4.42165	0.653911			4.42165	0.524506
					4.42322	0.615941			4.42322	0.682342			4.42322	0.524506
					4.42479	0.615941			4.42479	0.691819			4.42479	0.524506
					4.42636	0.627786			4.42636	0.682342			4.42636	0.546826
					4.42793	0.604096			4.42793	0.691819			4.42793	0.524506
					4.4295	0.627786			4.4295	0.691819			4.4295	0.524506
					4.43108	0.663322			4.43108	0.691819			4.43108	0.524506
					4.43265	0.663322			4.43265	0.691819			4.43265	0.513347
					4.43422	0.627786			4.43422	0.682342			4.43422	0.535666
					4.43579	0.651477			4.43579	0.691819			4.43579	0.546826
					4.43736	0.639631			4.43736	0.672865			4.43736	0.546826
					4.43893	0.639631			4.43893	0.672865			4.43893	0.546826
					4.44051	0.627786			4.44051	0.663388			4.44051	0.535666
					4.44208	0.639631			4.44208	0.663388			4.44208	0.546826
					4.44365	0.639631			4.44365	0.634957			4.44365	0.546826
					4.44522	0.698857			4.44522	0.663388			4.44522	0.557986
					4.44679	0.675167			4.44679	0.634957			4.44679	0.602624
					4.44836	0.651477			4.44836	0.634957			4.44836	0.613784
					4.44993	0.639631			4.44993	0.62548			4.44993	0.647263
					4.45151	0.639631			4.45151	0.597049			4.45151	0.658423
					4.45308	0.627786			4.45308	0.597049			4.45308	0.658423
					4.45465	0.639631			4.45465	0.616003			4.45465	0.703062
					4.45622	0.651477			4.45622	0.587572			4.45622	0.75886
					4.45779	0.663322			4.45779	0.606526			4.45779	0.736541
					4.45936	0.675167			4.45936	0.616003			4.45936	0.725381
					4.46094	0.687012			4.46094	0.606526			4.46094	0.747701
					4.46251	0.675167			4.46251	0.616003			4.46251	0.725381
					4.46408	0.698857			4.46408	0.62548			4.46408	0.747701
					4.46565	0.687012			4.46565	0.634957			4.46565	0.75886
					4.46722	0.675167			4.46722	0.634957			4.46722	0.703062
					4.46879	0.651477			4.46879	0.653911			4.46879	0.714221
					4.47037	0.663322			4.47037	0.663388			4.47037	0.691902
					4.47194	0.627786			4.47194	0.663388			4.47194	0.658423
					4.47351	0.639631			4.47351	0.672865			4.47351	0.669583
					4.47508	0.580406			4.47508	0.653911			4.47508	0.669583
					4.47665	0.592251			4.47665	0.663388			4.47665	0.669583
					4.47822	0.556716			4.47822	0.682342			4.47822	0.624944
					4.47979	0.568561			4.47979	0.672865			4.47979	0.624944
					4.48137	0.544871			4.48137	0.672865			4.48137	0.624944
					4.48294	0.556716			4.48294	0.682342			4.48294	0.613784
					4.48451	0.533026			4.48451	0.710772			4.48451	0.613784
					4.48608	0.533026			4.48608	0.653911			4.48608	0.602624
					4.48765	0.521181			4.48765	0.653911			4.48765	0.591465
					4.48922	0.497491			4.48922	0.682342			4.48922	0.591465
					4.4908	0.461956			4.4908	0.672865			4.4908	0.580305
					4.49237	0.414576			4.49237	0.644434			4.49237	0.591465
					4.49394	0.379041			4.49394	0.653911			4.49394	0.602624
					4.49551	0.367196			4.49551	0.653911			4.49551	0.613784
					4.49708	0.343506			4.49708	0.644434			4.49708	0.613784
					4.49865	0.319816			4.49865	0.653911			4.49865	0.591465
					4.50023	0.402731			4.50023	0.644434			4.50023	0.591465
					4.5018	0.580406			4.5018	0.663388			4.5018	0.613784
					4.50337	0.687012			4.50337	0.644434			4.50337	0.636104
					4.50494	0.675167			4.50494	0.634957			4.50494	0.624944
					4.50651	0.710702			4.50651	0.653911			4.50651	0.624944
					4.50808	0.687012			4.50808	0.62548			4.50808	0.636104
					4.50965	0.639631			4.50965	0.616003			4.50965	0.636104
					4.51123	0.556716			4.51123	0.616003			4.51123	0.636104
					4.5128	0.509336			4.5128	0.62548			4.5128	0.647263
					4.51437	0.438266			4.51437	0.597049			4.51437	0.647263
					4.51594	0.438266			4.51594	0.606526			4.51594	0.613784
					4.51751	0.438266			4.51751	0.616003			4.51751	0.658423
					4.51908	0.485646			4.51908	0.606526			4.51908	0.691902
					4.52066	0.509336			4.52066	0.587572			4.52066	0.691902
					4.52223	0.556716			4.52223	0.606526			4.52223	0.669583
					4.5238	0.568561			4.5238	0.597049			4.5238	0.669583
					4.52537	0.627786			4.52537	0.606526			4.52537	0.691902
					4.52694	0.604096			4.52694	0.634957			4.52694	0.680742
					4.52851	0.627786			4.52851	0.653911			4.52851	0.691902
					4.53009	0.604096			4.53009	0.653911			4.53009	0.725381
					4.53166	0.592251			4.53166	0.663388			4.53166	0.691902
					4.53323	0.556716			4.53323	0.672865			4.53323	0.691902
					4.5348	0.604096			4.5348	0.682342			4.5348	0.691902
					4.53637	0.580406			4.53637	0.682342			4.53637	0.691902
					4.53794	0.615941			4.53794	0.701296			4.53794	0.703062
					4.53951	0.615941			4.53951	0.701296			4.53951	0.703062
					4.54109	0.615941			4.54109	0.691819			4.54109	0.691902
					4.54266	0.639631			4.54266	0.663388			4.54266	0.680742
					4.54423	0.698857			4.54423	0.682342			4.54423	0.680742
					4.5458	0.627786			4.5458	0.701296			4.5458	0.691902
					4.54737	0.627786			4.54737	0.691819			4.54737	0.680742
					4.54894	0.604096			4.54894	0.710772			4.54894	0.680742
					4.55052	0.604096			4.55052	0.663388			4.55052	0.669583
					4.55209	0.627786			4.55209	0.672865			4.55209	0.647263
					4.55366	0.592251			4.55366	0.634957			4.55366	0.647263
					4.55523	0.604096			4.55523	0.597049			4.55523	0.647263
					4.5568	0.604096			4.5568	0.568618			4.5568	0.647263
					4.55837	0.615941			4.55837	0.492802			4.55837	0.624944
					4.55995	0.627786			4.55995	0.473848			4.55995	0.591465
					4.56152	0.651477			4.56152	0.454894			4.56152	0.636104
					4.56309	0.663322			4.56309	0.445417			4.56309	0.602624
					4.56466	0.639631			4.56466	0.445417			4.56466	0.624944
					4.56623	0.639631			4.56623	0.464371			4.56623	0.624944
					4.5678	0.639631			4.5678	0.464371			4.5678	0.624944
					4.56938	0.651477			4.56938	0.464371			4.56938	0.613784
					4.57095	0.651477			4.57095	0.445417			4.57095	0.602624
					4.57252	0.639631			4.57252	0.464371			4.57252	0.602624
					4.57409	0.651477			4.57409	0.492802			4.57409	0.624944
					4.57566	0.639631			4.57566	0.521233			4.57566	0.613784
					4.57723	0.651477			4.57723	0.568618			4.57723	0.602624
					4.5788	0.615941			4.5788	0.62548			4.5788	0.613784
					4.58038	0.615941			4.58038	0.653911			4.58038	0.613784
					4.58195	0.639631			4.58195	0.691819			4.58195	0.602624
					4.58352	0.651477			4.58352	0.691819			4.58352	0.602624
					4.58509	0.639631			4.58509	0.701296			4.58509	0.602624
					4.58666	0.615941			4.58666	0.701296			4.58666	0.613784
					4.58823	0.627786			4.58823	0.672865			4.58823	0.613784
					4.58981	0.627786			4.58981	0.691819			4.58981	0.624944
					4.59138	0.651477			4.59138	0.682342			4.59138	0.624944
					4.59295	0.639631			4.59295	0.691819			4.59295	0.636104
					4.59452	0.663322			4.59452	0.682342			4.59452	0.624944
					4.59609	0.675167			4.59609	0.691819			4.59609	0.636104
					4.59766	0.663322			4.59766	0.672865			4.59766	0.658423
					4.59924	0.651477			4.59924	0.672865			4.59924	0.624944
					4.60081	0.663322			4.60081	0.663388			4.60081	0.669583
					4.60238	0.651477			4.60238	0.653911			4.60238	0.647263
					4.60395	0.651477			4.60395	0.644434			4.60395	0.680742
					4.60552	0.639631			4.60552	0.634957			4.60552	0.680742
					4.60709	0.698857			4.60709	0.616003			4.60709	0.680742
					4.60866	0.651477			4.60866	0.62548			4.60866	0.680742
					4.61024	0.627786			4.61024	0.568618			4.61024	0.691902
					4.61181	0.615941			4.61181	0.578095			4.61181	0.691902
					4.61338	0.592251			4.61338	0.587572			4.61338	0.691902
					4.61495	0.556716			4.61495	0.568618			4.61495	0.680742
					4.61652	0.533026			4.61652	0.568618			4.61652	0.680742
					4.61809	0.556716			4.61809	0.587572			4.61809	0.691902
					4.61967	0.568561			4.61967	0.606526			4.61967	0.691902
					4.62124	0.544871			4.62124	0.587572			4.62124	0.680742
					4.62281	0.521181			4.62281	0.616003			4.62281	0.691902
					4.62438	0.485646			4.62438	0.616003			4.62438	0.691902
					4.62595	0.497491			4.62595	0.634957			4.62595	0.703062
					4.62752	0.509336			4.62752	0.653911			4.62752	0.691902
					4.6291	0.461956			4.6291	0.663388			4.6291	0.703062
					4.63067	0.473801			4.63067	0.663388			4.63067	0.669583
					4.63224	0.521181			4.63224	0.682342			4.63224	0.647263
					4.63381	0.497491			4.63381	0.682342			4.63381	0.669583
					4.63538	0.544871			4.63538	0.672865			4.63538	0.658423
					4.63695	0.556716			4.63695	0.682342			4.63695	0.658423
					4.63852	0.592251			4.63852	0.682342			4.63852	0.613784
					4.6401	0.615941			4.6401	0.701296			4.6401	0.602624
					4.64167	0.592251			4.64167	0.682342			4.64167	0.602624
					4.64324	0.615941			4.64324	0.682342			4.64324	0.580305
					4.64481	0.639631			4.64481	0.672865			4.64481	0.580305
					4.64638	0.639631			4.64638	0.663388			4.64638	0.569145
					4.64795	0.663322			4.64795	0.663388			4.64795	0.580305
					4.64953	0.675167			4.64953	0.672865			4.64953	0.602624
					4.6511	0.675167			4.6511	0.663388			4.6511	0.546826
					4.65267	0.651477			4.65267	0.663388			4.65267	0.569145
					4.65424	0.627786			4.65424	0.663388			4.65424	0.569145
					4.65581	0.663322			4.65581	0.672865			4.65581	0.580305
					4.65738	0.663322			4.65738	0.663388			4.65738	0.580305
					4.65896	0.627786			4.65896	0.653911			4.65896	0.591465
					4.66053	0.639631			4.66053	0.672865			4.66053	0.580305
					4.6621	0.592251			4.6621	0.663388			4.6621	0.557986
					4.66367	0.604096			4.66367	0.682342			4.66367	0.569145
					4.66524	0.556716			4.66524	0.682342			4.66524	0.580305
					4.66681	0.556716			4.66681	0.691819			4.66681	0.569145
					4.66838	0.521181			4.66838	0.691819			4.66838	0.569145
					4.66996	0.497491			4.66996	0.691819			4.66996	0.569145
					4.67153	0.473801			4.67153	0.672865			4.67153	0.580305
					4.6731	0.450111			4.6731	0.653911			4.6731	0.613784
					4.67467	0.473801			4.67467	0.663388			4.67467	0.613784
					4.67624	0.473801			4.67624	0.634957			4.67624	0.636104
					4.67781	0.485646			4.67781	0.568618			4.67781	0.624944
					4.67939	0.497491			4.67939	0.511756			4.67939	0.658423
					4.68096	0.544871			4.68096	0.511756			4.68096	0.680742
					4.68253	0.580406			4.68253	0.473848			4.68253	0.680742
					4.6841	0.651477			4.6841	0.473848			4.6841	0.691902
					4.68567	0.627786			4.68567	0.473848			4.68567	0.691902
					4.68724	0.639631			4.68724	0.483325			4.68724	0.691902
					4.68882	0.698857			4.68882	0.464371			4.68882	0.703062
					4.69039	0.639631			4.69039	0.473848			4.69039	0.691902
					4.69196	0.663322			4.69196	0.473848			4.69196	0.703062
					4.69353	0.687012			4.69353	0.502279			4.69353	0.725381
					4.6951	0.663322			4.6951	0.502279			4.6951	0.703062
					4.69667	0.639631			4.69667	0.511756			4.69667	0.691902
					4.69824	0.698857			4.69824	0.540187			4.69824	0.680742
					4.69982	0.627786			4.69982	0.578095			4.69982	0.691902
					4.70139	0.580406			4.70139	0.616003			4.70139	0.703062
					4.70296	0.544871			4.70296	0.644434			4.70296	0.691902
					4.70453	0.497491			4.70453	0.653911			4.70453	0.680742
[truncated: 5 more rows]
