# Supplementary material for: Mechanical instability and interfacial energy drive biofilm morphogenesis
Source: eLife. 2019 Mar 8;8:e43920. doi: 10.7554/eLife.43920 (PMC6453567; doi:10.7554/eLife.43920)
Supplement: Figure 2—figure supplement 1—source data 1. [file elife-43920-fig2-figsupp1-data1.xlsx]

## Sheet: Figure 2 - figure supplement 1
		Figure 2 - figure supplement 1 B&C							Figure 2 - figure supplement 1 D
Description		Data extracted using customized Matlab code. The raw data are represented as (t, r, N). See main text for the depository of the code and figure legend for more details.							Data extracted using customized Matlab code. Wavelengths λ are measured for each biological copy in different geometries. See main text for the depository of the code and figure legend for more details.
Condition
Computed/Measured quantity		Agar conc. = 1.0%			Agar conc. = 0.8%				Circle	Line
		t (h)	r (mm)	N	t (h)	r (mm)	N		λ (μm)
									452.334	444.746
		8.75	0.4	9.33333	10	0.4	6		431.033	429.454
		6.25	0.4	8	11.25	0.4	3		442.637	428.556
		27.5	0.4	4	12.5	0.4	3
		30	0.4	4	13.75	0.4	3
		31.25	0.4	4	15	0.4	3
		8.75	0.44	9.33333	8.75	0.44	9
		6.25	0.44	6.66667	10	0.44	9
		7.5	0.44	6.66667	11.25	0.44	9
		23.75	0.44	4	12.5	0.44	9
		25	0.44	4	13.75	0.44	9
		6.25	0.48	10.6667	6.25	0.48	4
		10	0.48	9.33333	7.5	0.48	4
		11.25	0.48	9.33333	11.25	0.48	4
		12.5	0.48	9.33333	12.5	0.48	4
		13.75	0.48	5.33333	13.75	0.48	4
		11.25	0.52	14.6667	12.5	0.52	6
		6.25	0.52	13.3333	13.75	0.52	6
		15	0.52	9.33333	15	0.52	6
		28.75	0.52	5.33333	16.25	0.52	6
		30	0.52	5.33333	17.5	0.52	6
		8.75	0.56	14.6667	16.25	0.56	6
		10	0.56	14.6667	17.5	0.56	6
		11.25	0.56	6.66667	18.75	0.56	6
		12.5	0.56	6.66667	20	0.56	6
		13.75	0.56	6.66667	21.25	0.56	6
		8.75	0.6	10.6667	10	0.6	18
		6.25	0.6	8	8.75	0.6	16
		30	0.6	8	28.75	0.6	6
		31.25	0.6	8	30	0.6	6
		32.5	0.6	8	31.25	0.6	6
		6.25	0.64	12	36.25	0.64	6
		8.75	0.64	10.6667	37.5	0.64	6
		10	0.64	10.6667	38.75	0.64	6
		11.25	0.64	8	7.5	0.64	5
		12.5	0.64	8	11.25	0.64	5
		8.75	0.68	10.6667	7.5	0.68	5
		10	0.68	9.33333	8.75	0.68	5
		11.25	0.68	9.33333	10	0.68	5
		12.5	0.68	9.33333	11.25	0.68	5
		13.75	0.68	9.33333	12.5	0.68	5
		8.75	0.72	12	10	0.72	8
		10	0.72	9.33333	11.25	0.72	8
		11.25	0.72	9.33333	12.5	0.72	8
		12.5	0.72	9.33333	13.75	0.72	7
		13.75	0.72	9.33333	15	0.72	7
		10	0.76	17.3333	6.25	0.76	30
		11.25	0.76	17.3333	12.5	0.76	16
		12.5	0.76	17.3333	13.75	0.76	16
		13.75	0.76	17.3333	10	0.76	15
		15	0.76	17.3333	11.25	0.76	15
		10	0.8	17.3333	6.25	0.8	10
		11.25	0.8	17.3333	7.5	0.8	10
		12.5	0.8	17.3333	10	0.8	10
		13.75	0.8	17.3333	11.25	0.8	10
		15	0.8	17.3333	12.5	0.8	10
		10	0.84	14.6667	10	0.84	8
		11.25	0.84	14.6667	11.25	0.84	8
		12.5	0.84	14.6667	12.5	0.84	8
		13.75	0.84	14.6667	13.75	0.84	8
		15	0.84	14.6667	15	0.84	8
		42.5	0.88	13.3333	37.5	0.88	11
		8.75	0.88	9.33333	38.75	0.88	11
		10	0.88	9.33333	40	0.88	11
		11.25	0.88	8	41.25	0.88	11
		12.5	0.88	8	12.5	0.88	5
		40	0.92	13.3333	32.5	0.92	11
		41.25	0.92	13.3333	33.75	0.92	11
		42.5	0.92	13.3333	36.25	0.92	11
		43.75	0.92	13.3333	35	0.92	9
		45	0.92	13.3333	37.5	0.92	9
		10	0.96	34.6667	11.25	0.96	22
		11.25	0.96	17.3333	8.75	0.96	14
		12.5	0.96	17.3333	10	0.96	14
		13.75	0.96	17.3333	61.25	0.96	6
		15	0.96	17.3333	63.75	0.96	6
		12.5	1	21.3333	20	1	22
		11.25	1	20	10	1	20
		13.75	1	17.3333	13.75	1	13
		15	1	13.3333	66.25	1	6
		16.25	1	13.3333	67.5	1	6
		8.75	1.04	13.3333	30	1.04	16
		10	1.04	13.3333	31.25	1.04	16
		11.25	1.04	13.3333	32.5	1.04	16
		12.5	1.04	13.3333	33.75	1.04	16
		13.75	1.04	13.3333	11.25	1.04	13
		12.5	1.08	17.3333	11.25	1.08	28
		13.75	1.08	17.3333	12.5	1.08	28
		15	1.08	17.3333	15	1.08	20
		16.25	1.08	17.3333	13.75	1.08	18
		17.5	1.08	17.3333	16.25	1.08	11
		8.75	1.12	20	10	1.12	30
		10	1.12	20	8.75	1.12	28
		11.25	1.12	20	11.25	1.12	22
		12.5	1.12	17.3333	12.5	1.12	22
		13.75	1.12	17.3333	13.75	1.12	22
		11.25	1.16	10.6667	10	1.16	24
		12.5	1.16	10.6667	11.25	1.16	24
		13.75	1.16	10.6667	18.75	1.16	22
		15	1.16	10.6667	20	1.16	22
		16.25	1.16	10.6667	21.25	1.16	22
		8.75	1.2	28	8.75	1.2	33
		10	1.2	28	10	1.2	33
		11.25	1.2	28	11.25	1.2	33
		12.5	1.2	28	12.5	1.2	33
		13.75	1.2	28	13.75	1.2	33
		8.75	1.24	28	11.25	1.24	33
		10	1.24	28	15	1.24	33
		11.25	1.24	28	16.25	1.24	33
		12.5	1.24	28	17.5	1.24	33
		13.75	1.24	28	18.75	1.24	33
		18.75	1.28	25.3333	10	1.28	17
		20	1.28	25.3333	11.25	1.28	17
		21.25	1.28	25.3333	12.5	1.28	17
		22.5	1.28	25.3333	13.75	1.28	17
		23.75	1.28	25.3333	15	1.28	17
		13.75	1.32	25.3333	11.25	1.32	18
		15	1.32	25.3333	12.5	1.32	18
		16.25	1.32	25.3333	16.25	1.32	18
		18.75	1.32	25.3333	21.25	1.32	18
		25	1.32	25.3333	22.5	1.32	18
		8.75	1.36	26.6667	8.75	1.36	20
		11.25	1.36	26.6667	10	1.36	20
		37.5	1.36	12	17.5	1.36	18
		38.75	1.36	12	18.75	1.36	18
		40	1.36	12	20	1.36	18
		10	1.4	17.3333	20	1.4	30
		38.75	1.4	13.3333	21.25	1.4	30
		40	1.4	13.3333	11.25	1.4	26
		41.25	1.4	13.3333	12.5	1.4	26
		42.5	1.4	13.3333	13.75	1.4	26
		11.25	1.44	18.6667	11.25	1.44	45
		12.5	1.44	13.3333	12.5	1.44	45
		13.75	1.44	13.3333	13.75	1.44	45
		15	1.44	13.3333	15	1.44	45
		16.25	1.44	13.3333	21.25	1.44	30
		8.75	1.48	26.6667	15	1.48	45
		22.5	1.48	13.3333	17.5	1.48	45
		23.75	1.48	13.3333	18.75	1.48	45
		25	1.48	13.3333	20	1.48	45
		26.25	1.48	13.3333	10	1.48	40
		45	1.52	13.3333	11.25	1.52	40
		47.5	1.52	13.3333	12.5	1.52	40
		48.75	1.52	13.3333	13.75	1.52	40
		50	1.52	13.3333	15	1.52	40
		51.25	1.52	13.3333	16.25	1.52	40
		16.25	1.56	38.6667	12.5	1.56	51
		18.75	1.56	38.6667	13.75	1.56	40
		17.5	1.56	21.3333	16.25	1.56	40
		20	1.56	21.3333	17.5	1.56	40
		30	1.56	13.3333	16.25	1.6	40
		21.25	1.6	14.6667	17.5	1.6	40
		22.5	1.6	14.6667	18.75	1.6	40
		23.75	1.6	14.6667	20	1.6	40
		25	1.6	14.6667	16.25	1.64	40
		26.25	1.6	14.6667	17.5	1.64	40
		12.5	1.64	32	18.75	1.64	40
		13.75	1.64	32	21.25	1.64	40
		21.25	1.64	14.6667	22.5	1.64	40
		22.5	1.64	14.6667	13.75	1.68	51
		23.75	1.64	14.6667	11.25	1.68	48
		18.75	1.68	48	12.5	1.68	46
		20	1.68	48	18.75	1.68	40
		33.75	1.68	20	21.25	1.68	40
		28.75	1.68	18.6667	10	1.72	46
		12.5	1.68	12	11.25	1.72	46
		8.75	1.72	32	12.5	1.72	46
		10	1.72	32	18.75	1.72	40
		11.25	1.72	32	20	1.72	40
		17.5	1.72	20	12.5	1.76	46
		18.75	1.72	20	13.75	1.76	46
		18.75	1.76	34.6667	18.75	1.76	40
		20	1.76	34.6667	20	1.76	40
		22.5	1.76	34.6667	21.25	1.76	40
		23.75	1.76	34.6667	15	1.8	46
		10	1.76	32	16.25	1.8	46
		7.5	1.8	34.6667	17.5	1.8	46
		8.75	1.8	34.6667	18.75	1.8	40
		22.5	1.8	34.6667	20	1.8	40
		23.75	1.8	34.6667	17.5	1.84	40
		25	1.8	34.6667	18.75	1.84	40
		22.5	1.84	34.6667	20	1.84	40
		23.75	1.84	34.6667	21.25	1.84	40
		25	1.84	34.6667	22.5	1.84	40
		11.25	1.88	24	17.5	1.88	40
		12.5	1.88	24	18.75	1.88	40
		13.75	1.88	24	20	1.88	40
		8.75	1.92	26.6667	20	1.92	40
		30	1.92	25.3333	21.25	1.92	40
		31.25	1.92	25.3333	22.5	1.92	40
		32.5	1.92	25.3333	23.75	1.92	40
		33.75	1.92	25.3333	25	1.92	40
		10	1.96	45.3333	21.25	1.96	40
		27.5	1.96	25.3333	23.75	1.96	40
		30	1.96	25.3333	25	1.96	40
		31.25	1.96	25.3333	26.25	1.96	40
		32.5	1.96	25.3333	17.5	2	40
		23.75	2	28	25	2	40
		25	2	28	26.25	2	40
		26.25	2	25.3333	27.5	2	40
		27.5	2	25.3333	28.75	2.04	46
		28.75	2	25.3333	7.5	2.04	40
		15	2.04	58.6667	26.25	2.04	40
		12.5	2.04	46.6667	27.5	2.04	40
		27.5	2.04	25.3333	28.75	2.04	40
		28.75	2.04	25.3333	30	2.08	40
		13.75	2.08	46.6667	28.75	2.08	40
		16.25	2.08	46.6667	30	2.08	40
		17.5	2.08	46.6667	31.25	2.08	40
		22.5	2.08	36	32.5	2.08	40
		20	2.12	46.6667	33.75	2.12	40
		15	2.12	42.6667	30	2.12	40
		17.5	2.12	36	31.25	2.12	40
		18.75	2.12	36	32.5	2.16	40
		21.25	2.12	36	31.25	2.16	40
		18.75	2.16	36	32.5	2.16	40
		20	2.16	36	33.75	2.2	40
		21.25	2.16	36	33.75	2.2	40
		22.5	2.16	36	35	2.2	40
		23.75	2.16	36	36.25	2.2	40
		18.75	2.2	36	37.5	2.2	40
		20	2.2	36	38.75	2.24	40
		21.25	2.2	36	35	2.24	40
		22.5	2.2	36	36.25	2.24	40
		23.75	2.2	36	37.5	2.24	40
		21.25	2.24	36	38.75	2.28	40
		22.5	2.24	36	36.25	2.28	40
		23.75	2.24	36	37.5	2.32	40
		26.25	2.24	36	37.5	2.32	40
		27.5	2.24	36	38.75	2.32	40
		22.5	2.28	36	40	2.32	40
		23.75	2.28	36	41.25	2.32	40
		27.5	2.28	36	42.5	2.36	40
		28.75	2.28	36	40	2.36	40
		30	2.28	36	41.25	2.36	40
		23.75	2.32	36	42.5	2.36	40
		25	2.32	36	43.75	2.4	40
		26.25	2.32	36	40	2.4	40
		27.5	2.32	36	41.25	2.4	40
		30	2.32	36	42.5	2.4	40
		23.75	2.36	36	43.75	2.4	40
		25	2.36	36	45	2.44	40
		26.25	2.36	36	40	2.44	40
		27.5	2.36	36	41.25	2.44	40
		28.75	2.36	36	42.5	2.44	40
		27.5	2.4	36	43.75	2.44	40
		28.75	2.4	36	45	2.48	40
		30	2.4	36	40	2.48	40
		31.25	2.4	36	41.25	2.48	40
		32.5	2.4	36	42.5	2.48	40
		31.25	2.44	36	43.75	2.48	40
		32.5	2.44	36	45	2.52	40
		33.75	2.44	36	38.75	2.52	40
		35	2.44	36	40	2.52	40
		36.25	2.44	36	41.25	2.52	40
		27.5	2.48	36	42.5	2.56	40
		31.25	2.48	36	40	2.56	40
		32.5	2.48	36	41.25	2.56	40
		33.75	2.48	36	42.5	2.56	40
		35	2.48	36	43.75	2.56	40
		48.75	2.52	42.6667	45	2.6	40
		50	2.52	42.6667	40	2.6	40
		31.25	2.52	36	41.25	2.6	40
		32.5	2.52	36	42.5	2.6	40
		33.75	2.52	36	43.75	2.6	40
		47.5	2.56	42.6667	45	2.64	44
		48.75	2.56	42.6667	43.75	2.64	44
		50	2.56	42.6667	45	2.64	44
		51.25	2.56	42.6667	46.25	2.64	40
		52.5	2.56	42.6667	41.25	2.64	40
		48.75	2.6	42.6667	42.5	2.68	44
		50	2.6	42.6667	41.25	2.68	44
		51.25	2.6	42.6667	42.5	2.68	44
		52.5	2.6	42.6667	43.75	2.68	44
		53.75	2.6	42.6667	45	2.68	44
		51.25	2.64	42.6667	46.25	2.72	44
		52.5	2.64	42.6667	41.25	2.72	44
		32.5	2.64	36	42.5	2.72	44
		33.75	2.64	36	43.75	2.72	44
		35	2.64	36	45	2.72	44
		50	2.68	53.3333	46.25	2.76	44
		51.25	2.68	46.6667	41.25	2.76	44
		52.5	2.68	46.6667	42.5	2.76	44
		53.75	2.68	46.6667	43.75	2.76	44
		48.75	2.68	42.6667	45	2.76	44
		45	2.72	53.3333	46.25	2.8	44
		46.25	2.72	53.3333	41.25	2.8	44
		47.5	2.72	53.3333	42.5	2.8	44
		48.75	2.72	53.3333	43.75	2.8	44
		50	2.72	53.3333	45	2.8	44
		41.25	2.76	53.3333	46.25	2.84	44
		42.5	2.76	53.3333	41.25	2.84	44
		43.75	2.76	53.3333	42.5	2.84	44
		45	2.76	53.3333	43.75	2.84	44
		46.25	2.76	53.3333	45	2.84	44
		38.75	2.8	53.3333	46.25	2.88	53
		40	2.8	53.3333	43.75	2.88	53
		41.25	2.8	53.3333	46.25	2.88	50
		42.5	2.8	53.3333	42.5	2.88	44
		43.75	2.8	53.3333	45	2.88	44
		40	2.84	53.3333	47.5	2.92	53
		41.25	2.84	53.3333	42.5	2.92	53
		42.5	2.84	53.3333	43.75	2.92	53
		43.75	2.84	53.3333	45	2.92	53
		45	2.84	53.3333	46.25	2.92	41
		40	2.88	53.3333	47.5	2.96	53
		41.25	2.88	53.3333	41.25	2.96	53
		42.5	2.88	53.3333	42.5	2.96	53
		43.75	2.88	53.3333	43.75	2.96	53
		45	2.88	53.3333	45	2.96	53
		38.75	2.92	53.3333	46.25	3	53
		40	2.92	53.3333	41.25	3	53
		41.25	2.92	53.3333	42.5	3	53
		42.5	2.92	53.3333	43.75	3	53
		43.75	2.92	53.3333	45	3	53
		40	2.96	53.3333	46.25	3.04	53
		41.25	2.96	53.3333	41.25	3.04	53
		42.5	2.96	53.3333	42.5	3.04	53
		43.75	2.96	53.3333	43.75	3.04	53
		45	2.96	53.3333	45	3.04	53
		38.75	3	53.3333	46.25	3.08	53
		40	3	53.3333	40	3.08	53
		41.25	3	53.3333	41.25	3.08	53
		42.5	3	53.3333	42.5	3.08	53
		43.75	3	53.3333	43.75	3.08	53
		38.75	3.04	53.3333	45	3.12	53
		40	3.04	53.3333	40	3.12	53
		41.25	3.04	53.3333	41.25	3.12	53
		42.5	3.04	53.3333	42.5	3.12	53
		43.75	3.04	53.3333	43.75	3.12	53
		38.75	3.08	53.3333	45	3.16	53
		40	3.08	53.3333	41.25	3.16	53
		41.25	3.08	53.3333	42.5	3.16	53
		42.5	3.08	53.3333	43.75	3.16	53
		43.75	3.08	53.3333	45	3.16	53
		51.25	3.12	68	46.25	3.2	59
		52.5	3.12	68	48.75	3.2	53
		53.75	3.12	68	40	3.2	53
		38.75	3.12	53.3333	41.25	3.2	53
		40	3.12	53.3333	42.5	3.2	53
		48.75	3.16	68	43.75	3.24	59
		50	3.16	68	48.75	3.24	54
		51.25	3.16	68	40	3.24	53
		52.5	3.16	68	41.25	3.24	53
		53.75	3.16	68	42.5	3.24	53
		47.5	3.2	68	43.75	3.28	59
		48.75	3.2	68	47.5	3.28	59
		50	3.2	68	48.75	3.28	53
		51.25	3.2	68	42.5	3.28	53
		52.5	3.2	68	43.75	3.28	53
		47.5	3.24	68	45	3.32	59
		51.25	3.24	68	43.75	3.32	59
		52.5	3.24	68	45	3.32	59
		53.75	3.24	68	46.25	3.32	59
		55	3.24	68	47.5	3.32	59
		51.25	3.28	68	48.75	3.36	59
		52.5	3.28	68	45	3.36	59
		53.75	3.28	68	46.25	3.36	59
		55	3.28	68	47.5	3.36	59
		56.25	3.28	68	48.75	3.36	54
		51.25	3.32	68	41.25	3.4	59
		52.5	3.32	68	45	3.4	59
		53.75	3.32	68	47.5	3.4	59
		55	3.32	68	48.75	3.4	54
		56.25	3.32	68	41.25	3.4	54
		51.25	3.36	68	42.5	3.44	74
		52.5	3.36	68	47.5	3.44	54
		53.75	3.36	68	41.25	3.44	54
		55	3.36	68	42.5	3.44	54
		50	3.36	66.6667	43.75	3.44	54
		57.5	3.4	68	45	3.48	74
		38.75	3.4	58.6667	45	3.48	74
		40	3.4	58.6667	46.25	3.48	74
		41.25	3.4	58.6667	47.5	3.48	74
		42.5	3.4	58.6667	48.75	3.48	54
		52.5	3.44	68	41.25	3.52	74
		53.75	3.44	68	45	3.52	74
		57.5	3.44	68	46.25	3.52	74
		38.75	3.44	66.6667	47.5	3.52	74
		40	3.44	58.6667	48.75	3.52	54
		55	3.48	74.6667	41.25	3.56	74
		56.25	3.48	74.6667	45	3.56	74
		57.5	3.48	74.6667	46.25	3.56	74
		38.75	3.48	66.6667	47.5	3.56	74
		37.5	3.48	58.6667	48.75	3.56	54
		52.5	3.52	74.6667	41.25	3.6	74
		53.75	3.52	74.6667	45	3.6	74
		55	3.52	74.6667	46.25	3.6	74
		56.25	3.52	74.6667	47.5	3.6	74
		57.5	3.52	74.6667	48.75	3.6	54
		52.5	3.56	74.6667	41.25	3.64	74
		53.75	3.56	74.6667	45	3.64	74
		55	3.56	74.6667	46.25	3.64	74
		56.25	3.56	74.6667	47.5	3.64	74
		57.5	3.56	74.6667	48.75	3.64	54
		52.5	3.6	74.6667	42.5	3.68	74
		53.75	3.6	74.6667	45	3.68	74
		55	3.6	74.6667	46.25	3.68	74
		56.25	3.6	74.6667	47.5	3.68	74
		57.5	3.6	74.6667	48.75	3.68	74
		55	3.64	78.6667	50	3.72	74
		56.25	3.64	78.6667	46.25	3.72	74
		57.5	3.64	78.6667	47.5	3.72	74
		52.5	3.64	74.6667	48.75	3.72	74
		53.75	3.64	74.6667	50	3.72	54
		46.25	3.68	78.6667	42.5	3.76	74
		48.75	3.68	78.6667	45	3.76	74
		50	3.68	78.6667	46.25	3.76	74
		51.25	3.68	78.6667	47.5	3.76	74
		52.5	3.68	78.6667	48.75	3.76	69
		46.25	3.72	78.6667	42.5	3.8	69
		47.5	3.72	78.6667	42.5	3.8	69
		48.75	3.72	78.6667	43.75	3.8	69
		50	3.72	78.6667	45	3.8	69
		51.25	3.72	78.6667	46.25	3.8	69
		45	3.76	78.6667	48.75	3.84	69
		46.25	3.76	78.6667	42.5	3.84	69
		47.5	3.76	78.6667	43.75	3.84	69
		48.75	3.76	78.6667	45	3.84	69
		50	3.76	78.6667	46.25	3.84	69
		37.5	3.8	78.6667	47.5	3.88	69
		42.5	3.8	78.6667	42.5	3.88	69
		43.75	3.8	78.6667	43.75	3.88	69
		45	3.8	78.6667	45	3.88	69
		46.25	3.8	78.6667	46.25	3.88	69
		40	3.84	78.6667	47.5	3.92	71
		41.25	3.84	78.6667	51.25	3.92	69
		42.5	3.84	78.6667	43.75	3.92	69
		43.75	3.84	78.6667	45	3.92	69
		45	3.84	78.6667	46.25	3.92	69
		38.75	3.88	78.6667	47.5	3.96	80
		40	3.88	78.6667	48.75	3.96	71
		41.25	3.88	78.6667	51.25	3.96	69
		42.5	3.88	78.6667	43.75	3.96	69
		43.75	3.88	78.6667	45	3.96	69
		38.75	3.92	78.6667	46.25	4	71
		40	3.92	78.6667	51.25	4	69
		41.25	3.92	78.6667	45	4	69
		42.5	3.92	78.6667	46.25	4	69
		43.75	3.92	78.6667	47.5	4	69
		40	3.96	78.6667	48.75	4.04	71
		41.25	3.96	78.6667	51.25	4.04	69
		42.5	3.96	78.6667	45	4.04	69
		43.75	3.96	78.6667	46.25	4.04	69
		45	3.96	78.6667	47.5	4.04	69
		40	4	78.6667	48.75	4.08	71
		41.25	4	78.6667	51.25	4.08	69
		42.5	4	78.6667	45	4.08	69
		43.75	4	78.6667	46.25	4.08	69
		45	4	78.6667	47.5	4.08	69
		40	4.04	78.6667	48.75	4.12	78
		41.25	4.04	78.6667	51.25	4.12	76
		42.5	4.04	78.6667	45	4.12	76
		43.75	4.04	78.6667	46.25	4.12	69
		45	4.04	78.6667	47.5	4.12	69
		41.25	4.08	78.6667	48.75	4.16	78
		42.5	4.08	78.6667	48.75	4.16	78
		43.75	4.08	78.6667	50	4.16	77
		45	4.08	78.6667	51.25	4.16	76
		46.25	4.08	78.6667	45	4.16	76
		42.5	4.12	78.6667	46.25	4.2	78
		43.75	4.12	78.6667	48.75	4.2	78
		45	4.12	78.6667	50	4.2	78
		46.25	4.12	78.6667	51.25	4.2	76
		47.5	4.12	78.6667	46.25	4.2	76
		41.25	4.16	90.6667	47.5	4.24	76
		47.5	4.16	90.6667	43.75	4.24	76
		48.75	4.16	90.6667	45	4.24	76
		42.5	4.16	78.6667	46.25	4.24	76
		43.75	4.16	78.6667	47.5	4.24	76
		41.25	4.2	90.6667	48.75	4.28	76
		42.5	4.2	90.6667	43.75	4.28	76
		43.75	4.2	90.6667	45	4.28	76
		45	4.2	90.6667	46.25	4.28	76
		46.25	4.2	90.6667	47.5	4.28	76
		41.25	4.24	90.6667	48.75	4.32	76
		42.5	4.24	90.6667	43.75	4.32	76
		43.75	4.24	90.6667	45	4.32	76
		45	4.24	90.6667	46.25	4.32	76
		46.25	4.24	90.6667	47.5	4.32	76
		41.25	4.28	90.6667	48.75	4.36	91
		42.5	4.28	90.6667	43.75	4.36	89
		43.75	4.28	90.6667	48.75	4.36	89
		45	4.28	90.6667	50	4.36	89
		46.25	4.28	90.6667	51.25	4.36	76
		42.5	4.32	90.6667	45	4.4	89
		43.75	4.32	90.6667	46.25	4.4	89
		45	4.32	90.6667	47.5	4.4	89
		46.25	4.32	90.6667	48.75	4.4	89
		47.5	4.32	90.6667	50	4.4	89
		43.75	4.36	90.6667	51.25	4.44	89
		45	4.36	90.6667	46.25	4.44	89
		46.25	4.36	90.6667	47.5	4.44	89
		47.5	4.36	90.6667	48.75	4.44	89
		48.75	4.36	90.6667	50	4.44	89
		43.75	4.4	90.6667	51.25	4.48	89
		45	4.4	90.6667	45	4.48	89
		46.25	4.4	90.6667	46.25	4.48	89
		47.5	4.4	90.6667	47.5	4.48	89
		48.75	4.4	90.6667	48.75	4.48	89
		45	4.44	90.6667	50	4.52	89
		46.25	4.44	90.6667	45	4.52	89
		47.5	4.44	90.6667	46.25	4.52	89
		48.75	4.44	90.6667	47.5	4.52	89
		50	4.44	90.6667	48.75	4.52	89
		45	4.48	90.6667	50	4.56	89
		46.25	4.48	90.6667	45	4.56	89
		47.5	4.48	90.6667	46.25	4.56	89
		48.75	4.48	90.6667	47.5	4.56	89
		50	4.48	90.6667	48.75	4.56	89
		45	4.52	90.6667	50	4.6	89
		46.25	4.52	90.6667	45	4.6	89
		47.5	4.52	90.6667	46.25	4.6	89
		48.75	4.52	90.6667	47.5	4.6	89
		50	4.52	90.6667	48.75	4.6	89
		46.25	4.56	90.6667	50	4.64	89
		47.5	4.56	90.6667	46.25	4.64	89
		48.75	4.56	90.6667	47.5	4.64	89
		50	4.56	90.6667	48.75	4.64	89
		51.25	4.56	90.6667	50	4.64	89
		48.75	4.6	90.6667	51.25	4.68	90
		50	4.6	90.6667	45	4.68	89
		51.25	4.6	90.6667	46.25	4.68	89
		52.5	4.6	90.6667	47.5	4.68	89
		53.75	4.6	90.6667	48.75	4.68	89
		48.75	4.64	90.6667	50	4.72	89
		50	4.64	90.6667	46.25	4.72	89
		51.25	4.64	90.6667	47.5	4.72	89
		52.5	4.64	90.6667	48.75	4.72	89
		53.75	4.64	90.6667	50	4.72	89
		51.25	4.68	90.6667	51.25	4.76	89
		52.5	4.68	90.6667	46.25	4.76	89
		53.75	4.68	90.6667	47.5	4.76	89
		55	4.68	90.6667	48.75	4.76	89
		56.25	4.68	90.6667	50	4.76	89
		52.5	4.72	90.6667	51.25	4.8	90
		53.75	4.72	90.6667	46.25	4.8	89
					47.5	4.8	89
					48.75	4.8	89
					50	4.8	89
					51.25	4.84	89
					47.5	4.84	89
					48.75	4.84	89
					50	4.84	89
					51.25	4.84	89
					52.5	4.88	89
					47.5	4.88	89
					48.75	4.88	89
					50	4.88	89
					51.25	4.88	89
					52.5	4.92	90
					47.5	4.92	90
					48.75	4.96	90
					48.75	5	90
					47.5
