# Supplementary material for: Mechanical instability and interfacial energy drive biofilm morphogenesis
Source: eLife. 2019 Mar 8;8:e43920. doi: 10.7554/eLife.43920 (PMC6453567; doi:10.7554/eLife.43920)
Supplement: Figure 2—figure supplement 2—source data 2. [file elife-43920-fig2-figsupp2-data2.xlsx]

## Sheet: Figure 2 - figure supplement 2
	Figure 2 - figure supplement 2 B
Description	Data listed in Table 3. See also Table 3 - Source Data.
