# Supplementary material for: Mechanical instability and interfacial energy drive biofilm morphogenesis
Source: eLife. 2019 Mar 8;8:e43920. doi: 10.7554/eLife.43920 (PMC6453567; doi:10.7554/eLife.43920)
Supplement: Figure 2—figure supplement 3—source data 3. [file elife-43920-fig2-figsupp3-data3.xlsx]

## Sheet: Figure 2 - figure supplement 3
		Figure 2 - figure supplement 3 A
Description		CFU counts for the biofilm layer and the residual layer. We note that there is a large variation in CFU counts for different biological copies. Thus, we ignore other source of uncertainty when calculating the volume density of live cells (CFU/mm3).
Condition
Computed/Measured quantity		Agar conc. = 0.6%
		CFU counts (averaged over two technical copies)
		Sample ID	Biofilm layer (x 109)	Residual layer (x 109)
		1	3.2	0.12775
		2	2.085	0.1049
		3	5.775	0.2139
		4	1.74	0.063
		To normalize the absolute CFU counts, we then calculate CFU/volume. The volume of each layer is calculated to be V = πD2h/4, where D is the radius of the colony and h is thickness of each layer. See data for h in Table 3 and its Source data table.
		Biofilm size
		Sample ID	Diameter D (mm)
		1	15.3
		2	16.5
		3	17.4
		4	16.9
		Mean	16.525
		CFU counts / volume (averaged over two technical copies)
		Sample ID	Biofilm layer (x 109/mm3)	Residual layer (x 109/mm3)
		1	0.257857	0.102364
		2	0.16801	0.084054
		3	0.465351	0.171394
		4	0.14021	0.050481
