# Supplementary material for: Mechanical instability and interfacial energy drive biofilm morphogenesis
Source: eLife. 2019 Mar 8;8:e43920. doi: 10.7554/eLife.43920 (PMC6453567; doi:10.7554/eLife.43920)
Supplement: Figure 2—figure supplement 4—source data 4. [file elife-43920-fig2-figsupp4-data4.xlsx]

## Sheet: Figure 2 - figure supplement 3
		Figure 2 - figure supplement 3 C					Figure 2 - figure supplement 3 D-F											Figure 2 - figure supplement 3 G
Description		Critical strain for wrinkling instability in different theoretical models. Data are presented as εc and 2π(Gf/Gs)1/3 for each case. See main text for the depository for the simulation code.					Trilayer theory prediction with different paramters. Data are presented as λ/hf and 2π(Gf/Gs)1/3 for each case. See Material and Methods for theory details.											Fitting data with measured thickness. See Material and Methods for the fitting procedure. See also Table 3 - Source Data for the experimental data.
Condition
Computed/Measured quantity								Gr/Gf = 0.1			Gr/Gf = 0.2			Gr/Gf = 0.3
			bilayer theory	trilayer theory	trilayer simulation			hr/hf = 0.1	hr/hf = 0.2	hr/hf = 0.3	hr/hf = 0.1	hr/hf = 0.2	hr/hf = 0.3	hr/hf = 0.1	hr/hf = 0.2	hr/hf = 0.3			Gr/Gf = 0.1	Gr/Gf = 0.2	Gr/Gf = 0.3
		2π(Gf/Gs)1/3	εc				2π(Gf/Gs)1/3	λ / hf										2π(Gf/Gs)1/3	λ / hf
		1.3	5.84	0.331711	0.335989		9.38583	9.38583	9.38583	9.38583	9.38674	9.38958	9.39457	9.38746	9.39266	9.40193		7.91566	7.91593	7.91568	7.91579
		1.6	3.85531	0.330317	0.335106		8.52719	8.52761	8.52883	8.53079	8.52763	8.529	8.53135	8.52843	8.53237	8.53935		6.52157	6.52337	6.52168	6.52157
		1.9	2.73396	0.328303	0.333333		7.74711	7.74952	7.75621	7.76643	7.74716	7.74732	7.74759	7.74783	7.75012	7.75412		5.64825	5.70095	5.65681	5.6498
		2.2	2.03917	0.325569	0.331551		7.03838	7.04619	7.06632	7.09499	7.03854	7.03901	7.03976	7.03859	7.03923	7.04034		4.54362	4.80313	4.62362	4.5753
		2.5	1.57914	0.322024	0.328859		6.39449	6.41416	6.46018	6.52014	6.39614	6.40071	6.40777	6.39451	6.39455	6.39463		3.68279	4.5222	4.09343	3.92073
		2.8	1.25888	0.317594	0.326146		5.80951	5.85212	5.93998	6.04328	5.8157	5.83172	5.8546	5.8104	5.81293	5.81689		2.90689	5.08179	4.35487	3.99807
		3.1	1.02701	0.312226	0.321574		5.27804	5.36052	5.5063	5.66025	5.29472	5.33362	5.38416	5.28235	5.29369	5.31019		2.13074	5.49201	4.64034	4.20929
		3.4	0.853772	0.305886	0.31694		4.79519	4.94023	5.15549	5.36097	4.83252	4.90868	4.99751	4.80799	4.83843	4.87867		1.4393	5.47256	4.60852	4.16911
		3.7	0.720935	0.298571	0.311295		4.35652	4.59056	4.87919	5.13179	4.42983	4.55716	4.69013	4.3867	4.44955	4.52399
		4	0.61685	0.290308	0.30459		3.95797	4.30762	4.66599	4.95851	4.08748	4.27522	4.45228	4.0192	4.12768	4.24241
		4.3	0.533781	0.281155	0.296765		3.59589	4.08424	4.50371	4.82844	3.80452	4.05494	4.27163	3.70639	3.86962	4.02506
		4.6	0.466427	0.271206	0.288762		3.26693	3.91121	4.38124	4.73114	3.57712	3.88607	4.1359	3.44763	3.66822	3.86043
		4.9	0.411062	0.260584	0.279539		2.96806	3.77895	4.28923	4.65845	3.39866	3.7582	4.03449	3.23959	3.51406	3.73709
		5.2	0.365	0.249438	0.270073		2.69653	3.67872	4.22027	4.60416	3.2611	3.66206	3.95887	3.07634	3.39753	3.64515
		5.5	0.326268	0.237934	0.259259		2.44985	3.60314	4.16863	4.56359	3.15633	3.59002	3.90252	2.95055	3.31003	3.57674
		5.8	0.293389	0.226244	0.24812		2.22573	3.54632	4.12997	4.53326	3.07714	3.53613	3.8605	2.85481	3.24456	3.52584
		6.1	0.265241	0.214538	0.237805		2.02212	3.50367	4.10104	4.51058	3.01753	3.49583	3.82913	2.78248	3.19564	3.48792
		6.4	0.240957	0.202973	0.226006		1.83713	3.47168	4.07937	4.4936	2.97277	3.46569	3.80571	2.72808	3.15908	3.45966
		6.7	0.219862	0.191681	0.215071		1.66906	3.4477	4.06314	4.48089	2.93921	3.44314	3.7882	2.68725	3.13176	3.43856
		7	0.20142	0.18077	0.203822		1.51637	3.42972	4.05098	4.47137	2.91405	3.42626	3.7751	2.65664	3.11133	3.4228
		7.3	0.185206	0.170323	0.193548		1.37765	3.41624	4.04187	4.46423	2.89519	3.41363	3.7653	2.6337	3.09605	3.41101
		7.6	0.170873	0.160394	0.183007
		7.9	0.158141	0.151014	0.165275
		8.2	0.146782	0.142196	0.154691
		8.5	0.136604	0.133938	0.145299
		8.8	0.127448	0.126227	0.137931
		9.1	0.119184	0.11904	0.130435
		9.4	0.111698	0.112352	0.122807
		9.7	0.104895	0.106133	0.115044
