# Supplementary material for: Mechanical instability and interfacial energy drive biofilm morphogenesis
Source: eLife. 2019 Mar 8;8:e43920. doi: 10.7554/eLife.43920 (PMC6453567; doi:10.7554/eLife.43920)
Supplement: Figure 2—source data 1. [file elife-43920-fig2-data1.xlsx]

## Sheet: Figure 2
		Figure 2A				Figure 2B				Figure 2C			Figure 2D
Description		Data extracted from customized Matlab code. The raw data are represented as (t, r, N). See main text for the depository of the code and figure legend for more details.				Experimental data are listed in the Table 3. See also Table 3-Source Data.				Line profile extracted from optical profiling. Raw data are represented as (x, z). See figure legend for more details.			Experimental data are listed in the Table 3. See also Table 3-Source Data for experimental data and Figure 2 - figure supplement 4 -Source Data for fitting data.
Condition
Computed/Measured quantity
		t (h)	r (mm)	N						x (mm)	z (μm)
		27.5	0.6917	18						0	0.442262
		28.75	0.6917	18						0.00332	0.443131
		22.5	0.6917	12						0.00664	0.473929
		16.25	0.6917	9						0.00996	0.526449
		73.75	0.6917	9						0.01328	0.587383
		6.25	0.76087	18						0.0166	0.660906
		17.5	0.76087	9						0.01992	0.753624
		41.25	0.76087	9						0.02324	0.856086
		47.5	0.76087	9						0.02656	0.948682
		51.25	0.76087	9						0.02988	1.01184
		13.75	0.83004	15						0.0332	1.03108
		23.75	0.83004	15						0.03652	1.00754
		27.5	0.83004	15						0.03984	0.962326
		18.75	0.83004	9						0.04316	0.920638
		40	0.83004	9						0.04648	0.894231
		12.5	0.89921	16						0.0498	0.881779
		20	0.89921	15						0.05312	0.877428
		30	0.89921	15						0.05644	0.872606
		31.25	0.89921	15						0.05976	0.856369
		32.5	0.89921	15						0.06308	0.823844
		25	0.96838	23						0.0664	0.786732
		12.5	0.96838	15						0.06972	0.768001
		21.25	0.96838	11						0.07304	0.784098
		15	0.96838	9						0.07636	0.836656
		6.25	1.03755	47						0.07968	0.908286
		20	1.03755	18						0.083	0.960638
		22.5	1.03755	16						0.08632	0.963436
		13.75	1.03755	15						0.08964	0.929096
		12.5	1.03755	13						0.09296	0.894342
		21.25	1.10672	18						0.09628	0.877694
		25	1.10672	18						0.0996	0.873679
		16.25	1.10672	15						0.10292	0.872037
		13.75	1.10672	13						0.10624	0.867389
		12.5	1.10672	12						0.10956	0.862155
		13.75	1.17589	23						0.11288	0.869424
		22.5	1.17589	18						0.1162	0.897507
		23.75	1.17589	16						0.11952	0.92552
		25	1.17589	16						0.12284	0.911374
		17.5	1.17589	15						0.12616	0.833324
		13.75	1.24506	23						0.12948	0.71419
		16.25	1.24506	20						0.1328	0.595116
		23.75	1.24506	18						0.13612	0.498947
		26.25	1.24506	18						0.13944	0.433347
		27.5	1.24506	18						0.14276	0.405964
		17.5	1.31423	39						0.14608	0.413111
		12.5	1.31423	28						0.1494	0.426271
		15	1.31423	22						0.15272	0.415153
		21.25	1.31423	20						0.15604	0.38655
		25	1.31423	14						0.15936	0.384961
		13.75	1.3834	23						0.16268	0.445492
		25	1.3834	22						0.166	0.555208
		26.25	1.3834	20						0.16932	0.665376
		27.5	1.3834	20						0.17264	0.732612
		12.5	1.45257	25						0.17596	0.745596
		26.25	1.45257	22						0.17928	0.726109
		27.5	1.45257	22						0.1826	0.709201
		13.75	1.45257	20						0.18592	0.718553
		30	1.45257	18						0.18924	0.75377
		55	1.52174	13						0.19256	0.791465
		60	1.52174	13						0.19588	0.798788
		62.5	1.52174	13						0.1992	0.7609
		63.75	1.52174	13						0.20252	0.702327
		65	1.52174	13						0.20584	0.668467
		31.25	1.59091	22						0.20916	0.681763
		61.25	1.59091	13						0.21248	0.726943
		68.75	1.59091	13						0.2158	0.776716
		70	1.59091	13						0.21912	0.819066
		71.25	1.59091	13						0.22244	0.853198
		51.25	1.66008	26						0.22576	0.872553
		36.25	1.66008	19						0.22908	0.865509
		37.5	1.66008	19						0.2324	0.831435
		38.75	1.66008	19						0.23572	0.782544
		40	1.66008	19						0.23904	0.724895
		33.75	1.72925	22						0.24236	0.656549
		35	1.72925	22						0.24568	0.591607
		36.25	1.72925	22						0.249	0.564834
		37.5	1.72925	19						0.25232	0.595999
		26.25	1.72925	18						0.25564	0.660946
		35	1.79842	24						0.25896	0.716464
		36.25	1.79842	24						0.26228	0.744043
		37.5	1.79842	24						0.2656	0.748597
		38.75	1.79842	24						0.26892	0.730231
		40	1.79842	24						0.27224	0.690122
		22.5	1.86759	30						0.27556	0.65279
		28.75	1.86759	24						0.27888	0.650073
		30	1.86759	24						0.2822	0.688485
		31.25	1.86759	24						0.28552	0.749107
		32.5	1.86759	24						0.28884	0.811804
		22.5	1.93676	33						0.29216	0.860723
		23.75	1.93676	30						0.29548	0.867893
		18.75	1.93676	25						0.2988	0.802477
		20	1.93676	25						0.30212	0.686135
		30	1.93676	24						0.30544	0.601997
		40	2.00593	39						0.30876	0.610113
		41.25	2.00593	39						0.31208	0.686848
		42.5	2.00593	39						0.3154	0.764964
		45	2.00593	39						0.31872	0.799059
		23.75	2.00593	33						0.32204	0.787132
		31.25	2.0751	39						0.32536	0.756461
		32.5	2.0751	39						0.32868	0.738454
		33.75	2.0751	39						0.332	0.745922
		35	2.0751	39						0.33532	0.766924
		36.25	2.0751	39						0.33864	0.77411
		28.75	2.14427	41						0.34196	0.752174
		20	2.14427	39						0.34528	0.714819
		30	2.14427	39						0.3486	0.682744
		31.25	2.14427	39						0.35192	0.65678
		32.5	2.14427	39						0.35524	0.637048
		28.75	2.21344	41						0.35856	0.642861
		30	2.21344	39						0.36188	0.685302
		31.25	2.21344	39						0.3652	0.739485
		32.5	2.21344	39						0.36852	0.768627
		33.75	2.21344	39						0.37184	0.758594
		27.5	2.28261	44						0.37516	0.718713
		28.75	2.28261	41						0.37848	0.670983
		20	2.28261	40						0.3818	0.642653
		21.25	2.28261	39						0.38512	0.648244
		30	2.28261	39						0.38844	0.672847
		30	2.35178	41						0.39176	0.684016
		28.75	2.35178	40						0.39508	0.672326
		31.25	2.35178	39						0.3984	0.66758
		32.5	2.35178	39						0.40172	0.699644
		33.75	2.35178	39						0.40504	0.758267
		18.75	2.42095	44						0.40836	0.807323
		20	2.42095	44						0.41168	0.825976
		21.25	2.42095	40						0.415	0.820687
		30	2.42095	40						0.41832	0.804717
		31.25	2.42095	40						0.42164	0.78333
		35	2.49012	50						0.42496	0.758748
		36.25	2.49012	50						0.42828	0.731379
		40	2.49012	50						0.4316	0.694101
		37.5	2.49012	45						0.43492	0.635986
		20	2.49012	44						0.43824	0.558631
		21.25	2.55929	46						0.44156	0.485608
		41.25	2.55929	45						0.44488	0.451313
		42.5	2.55929	45						0.4482	0.472193
		23.75	2.55929	38						0.45152	0.528779
		25	2.55929	37						0.45484	0.589759
		20	2.62846	50						0.45816	0.644163
		22.5	2.62846	46						0.46148	0.697377
		36.25	2.62846	45						0.4648	0.743556
		37.5	2.62846	45						0.46812	0.766557
		38.75	2.62846	45						0.47144	0.760834
		35	2.69763	51						0.47476	0.732582
		36.25	2.69763	51						0.47808	0.687887
		37.5	2.69763	51						0.4814	0.625867
		38.75	2.69763	51						0.48472	0.54745
		40	2.69763	51						0.48804	0.4685
		35	2.7668	51						0.49136	0.412994
		36.25	2.7668	51						0.49468	0.391807
		37.5	2.7668	51						0.498	0.401937
		38.75	2.7668	51						0.50132	0.440632
		43.75	2.7668	51						0.50464	0.496897
		40	2.83597	54						0.50796	0.546274
		45	2.83597	54						0.51128	0.578254
		43.75	2.83597	51						0.5146	0.612006
		47.5	2.83597	51						0.51792	0.663457
		35	2.83597	50						0.52124	0.715824
		42.5	2.90514	56						0.52456	0.742479
		22.5	2.90514	50						0.52788	0.735215
		33.75	2.90514	50						0.5312	0.693847
		35	2.90514	50						0.53452	0.617567
		36.25	2.90514	50						0.53784	0.516781
		22.5	2.97431	47						0.54116	0.412975
		43.75	2.97431	42						0.54448	0.322633
		25	2.97431	41						0.5478	0.257958
		23.75	2.97431	38						0.55112	0.238226
		26.25	2.97431	38						0.55444	0.275915
		23.75	3.04348	47						0.55776	0.354892
		22.5	3.04348	46						0.56108	0.443461
		27.5	3.04348	46						0.5644	0.526833
		25	3.04348	38						0.56772	0.607918
		26.25	3.04348	38						0.57104	0.675581
		23.75	3.11265	47						0.57436	0.703038
		32.5	3.11265	47						0.57768	0.689067
		43.75	3.11265	47						0.581	0.661837
		46.25	3.11265	47						0.58432	0.636872
		22.5	3.11265	46						0.58764	0.598251
		25	3.18182	47						0.59096	0.521162
		31.25	3.18182	47						0.59428	0.402951
		32.5	3.18182	47						0.5976	0.275599
		33.75	3.18182	47						0.60092	0.187586
		35	3.18182	47						0.60424	0.166427
		25	3.25099	47						0.60756	0.200622
		31.25	3.25099	47						0.61088	0.260358
		32.5	3.25099	47						0.6142	0.329998
		33.75	3.25099	47						0.61752	0.404345
		35	3.25099	47						0.62084	0.466211
		30	3.32016	50						0.62416	0.493324
		31.25	3.32016	50						0.62748	0.484816
		32.5	3.32016	50						0.6308	0.468541
		25	3.32016	47						0.63412	0.471843
		26.25	3.32016	47						0.63744	0.489832
		28.75	3.38933	50						0.64076	0.489121
		30	3.38933	50						0.64408	0.445716
		31.25	3.38933	50						0.6474	0.368628
		32.5	3.38933	50						0.65072	0.288113
		33.75	3.38933	50						0.65404	0.237437
		41.25	3.4585	51						0.65736	0.231828
		42.5	3.4585	51						0.66068	0.258576
		28.75	3.4585	50						0.664	0.290533
		30	3.4585	50						0.66732	0.307294
		31.25	3.4585	50						0.67064	0.305957
		45	3.52767	51						0.67396	0.299754
		46.25	3.52767	51						0.67728	0.30243
		30	3.52767	50						0.6806	0.311279
		31.25	3.52767	50						0.68392	0.320005
		32.5	3.52767	50						0.68724	0.340856
		42.5	3.59684	59						0.69056	0.387927
		43.75	3.59684	59						0.69388	0.441233
		45	3.59684	59						0.6972	0.454872
		46.25	3.59684	59						0.70052	0.404685
		48.75	3.59684	59						0.70384	0.310964
		38.75	3.66601	62						0.70716	0.207272
		40	3.66601	62						0.71048	0.11191
		41.25	3.66601	62						0.7138	0.037675
		42.5	3.66601	62						0.71712	0
		43.75	3.66601	62						0.72044	0.000968
		27.5	3.73518	67						0.72376	0.023938
		28.75	3.73518	67						0.72708	0.054943
		30	3.73518	67						0.7304	0.097864
		32.5	3.73518	67						0.73372	0.163446
		33.75	3.73518	62						0.73704	0.248466
		28.75	3.80435	67						0.74036	0.32807
		30	3.80435	67						0.74368	0.369297
		31.25	3.80435	67						0.747	0.359882
		32.5	3.80435	67						0.75032	0.319117
		33.75	3.80435	67						0.75364	0.283349
		27.5	3.87352	67						0.75696	0.282013
		28.75	3.87352	67						0.76028	0.317579
		30	3.87352	67						0.7636	0.364812
		31.25	3.87352	67						0.76692	0.39207
		32.5	3.87352	67						0.77024	0.384241
		27.5	3.94269	67						0.77356	0.352539
		28.75	3.94269	67						0.77688	0.324943
		30	3.94269	67						0.7802	0.321157
		31.25	3.94269	67						0.78352	0.332394
		32.5	3.94269	67						0.78684	0.336909
		28.75	4.01186	67						0.79016	0.331964
		30	4.01186	67						0.79348	0.332206
		31.25	4.01186	67						0.7968	0.344512
		32.5	4.01186	67						0.80012	0.363255
		33.75	4.01186	67						0.80344	0.384273
		28.75	4.08103	67						0.80676	0.40156
		30	4.08103	67						0.81008	0.404603
		31.25	4.08103	67						0.8134	0.394996
		32.5	4.08103	67						0.81672	0.401022
		33.75	4.08103	67						0.82004	0.456494
		61.25	4.1502	68						0.82336	0.553981
		28.75	4.1502	67						0.82668	0.637178
		30	4.1502	67						0.83	0.659806
		31.25	4.1502	67						0.83332	0.641127
		32.5	4.1502	67						0.83664	0.637189
		30	4.21937	67						0.83996	0.669124
		31.25	4.21937	67						0.84328	0.702372
		32.5	4.21937	67						0.8466	0.693269
		33.75	4.21937	67						0.84992	0.635643
		35	4.21937	67						0.85324	0.557074
		61.25	4.28854	68						0.85656	0.48261
		30	4.28854	67						0.85988	0.425769
		31.25	4.28854	67						0.8632	0.406489
		32.5	4.28854	67						0.86652	0.444306
		33.75	4.28854	67						0.86984	0.530181
		61.25	4.35771	68						0.87316	0.63249
		30	4.35771	67						0.87648	0.733052
		31.25	4.35771	67						0.8798	0.828303
		32.5	4.35771	67						0.88312	0.899614
		33.75	4.35771	67						0.88644	0.912376
		61.25	4.42688	68						0.88976	0.847876
		30	4.42688	67						0.89308	0.724469
		31.25	4.42688	67						0.8964	0.589077
		32.5	4.42688	67						0.89972	0.503367
		33.75	4.42688	67						0.90304	0.518167
		61.25	4.49605	68						0.90636	0.62709
		31.25	4.49605	67						0.90968	0.758948
		32.5	4.49605	67						0.913	0.845997
		33.75	4.49605	67						0.91632	0.891872
		35	4.49605	67						0.91964	0.949953
		61.25	4.56522	68						0.92296	1.04716
		31.25	4.56522	67						0.92628	1.15753
		32.5	4.56522	67						0.9296	1.24957
		33.75	4.56522	67						0.93292	1.3214
		35	4.56522	67						0.93624	1.38382
		32.5	4.63439	67						0.93956	1.42678
		33.75	4.63439	67						0.94288	1.42095
		35	4.63439	67						0.9462	1.35431
		36.25	4.63439	67						0.94952	1.25589
		37.5	4.63439	67						0.95284	1.17605
		32.5	4.70356	67						0.95616	1.14238
		33.75	4.70356	67						0.95948	1.1384
		35	4.70356	67						0.9628	1.13679
		36.25	4.70356	67						0.96612	1.13505
		37.5	4.70356	67						0.96944	1.14461
		32.5	4.77273	67						0.97276	1.16661
		33.75	4.77273	67						0.97608	1.20176
		35	4.77273	67						0.9794	1.25876
		36.25	4.77273	67						0.98272	1.33277
		37.5	4.77273	67						0.98604	1.39012
		32.5	4.8419	73						0.98936	1.39398
		33.75	4.8419	67						0.99268	1.35102
		35	4.8419	67						0.996	1.3192
		36.25	4.8419	67						0.99932	1.34471
		37.5	4.8419	67						1.00264	1.40851
		32.5	4.91107	73						1.00596	1.4582
		33.75	4.91107	67						1.00928	1.46698
		35	4.91107	67						1.0126	1.43685
		36.25	4.91107	67						1.01592	1.38481
		37.5	4.91107	67						1.01924	1.34597
		47.5	4.98024	78						1.02256	1.35273
		50	4.98024	78						1.02588	1.40444
		51.25	4.98024	78						1.0292	1.47734
		52.5	4.98024	78						1.03252	1.55176
		32.5	4.98024	73						1.03584	1.6093
		43.75	5.04941	78						1.03916	1.63839
		47.5	5.04941	78						1.04248	1.658
		48.75	5.04941	78						1.0458	1.70225
		50	5.04941	78						1.04912	1.77526
		51.25	5.04941	78						1.05244	1.84751
		50	5.11858	86						1.05576	1.89245
		51.25	5.11858	86						1.05908	1.90031
		52.5	5.11858	86						1.0624	1.87356
		53.75	5.11858	86						1.06572	1.83386
		55	5.11858	86						1.06904	1.81956
		45	5.18775	86						1.07236	1.84749
		46.25	5.18775	86						1.07568	1.89046
		52.5	5.18775	86						1.079	1.91578
		53.75	5.18775	86						1.08232	1.93248
		55	5.18775	86						1.08564	1.96666
		40	5.25692	83						1.08896	2.0099
		46.25	5.25692	83						1.09228	2.02534
		47.5	5.25692	83						1.0956	1.9947
		48.75	5.25692	83						1.09892	1.94054
		50	5.25692	83						1.10224	1.90145
		61.25	5.32609	94						1.10556	1.90066
		40	5.32609	83						1.10888	1.93891
		45	5.32609	83						1.1122	1.99596
		46.25	5.32609	83						1.11552	2.03731
		47.5	5.32609	83						1.11884	2.03583
		61.25	5.39526	94						1.12216	1.9884
		53.75	5.39526	93						1.12548	1.91611
		55	5.39526	93						1.1288	1.85641
		56.25	5.39526	93						1.13212	1.84999
		57.5	5.39526	93						1.13544	1.91466
		47.5	5.46443	93						1.13876	2.02691
		48.75	5.46443	93						1.14208	2.13557
		50	5.46443	93						1.1454	2.19272
		51.25	5.46443	93						1.14872	2.18351
		52.5	5.46443	93						1.15204	2.13901
		33.75	5.5336	93						1.15536	2.11403
		35	5.5336	93						1.15868	2.14402
		36.25	5.5336	93						1.162	2.22268
		37.5	5.5336	93						1.16532	2.30839
		43.75	5.5336	93						1.16864	2.35392
		40	5.60277	105						1.17196	2.33899
		41.25	5.60277	105						1.17528	2.28228
		45	5.60277	105						1.1786	2.21933
		46.25	5.60277	105						1.18192	2.17318
		35	5.60277	93						1.18524	2.15404
		55	5.67194	106						1.18856	2.16909
		56.25	5.67194	106						1.19188	2.2094
		40	5.67194	105						1.1952	2.24434
		42.5	5.67194	105						1.19852	2.25277
		43.75	5.67194	105						1.20184	2.24594
		40	5.74111	105						1.20516	2.24894
		41.25	5.74111	105						1.20848	2.27286
		42.5	5.74111	105						1.2118	2.31339
		43.75	5.74111	105						1.21512	2.35467
		45	5.74111	105						1.21844	2.37019
		40	5.81028	105						1.22176	2.33931
		41.25	5.81028	105						1.22508	2.27383
		42.5	5.81028	105						1.2284	2.214
		43.75	5.81028	105						1.23172	2.19276
		45	5.81028	105						1.23504	2.20829
		40	5.87945	105						1.23836	2.23353
		41.25	5.87945	105						1.24168	2.252
		42.5	5.87945	105						1.245	2.27352
		43.75	5.87945	105						1.24832	2.30461
		45	5.87945	105						1.25164	2.31956
		47.5	5.94862	106						1.25496	2.28484
		50	5.94862	106						1.25828	2.20721
		38.75	5.94862	105						1.2616	2.14053
		40	5.94862	105						1.26492	2.13968
		41.25	5.94862	105						1.26824	2.20883
		43.75	6.01779	106						1.27156	2.30665
		47.5	6.01779	106						1.27488	2.39585
		50	6.01779	106						1.2782	2.46495
		40	6.01779	105						1.28152	2.50894
		41.25	6.01779	105						1.28484	2.52603
		37.5	6.08696	106						1.28816	2.53234
		43.75	6.08696	106						1.29148	2.55516
		47.5	6.08696	106						1.2948	2.60092
		50	6.08696	106						1.29812	2.64378
		38.75	6.08696	105						1.30144	2.65397
		37.5	6.15613	106						1.30476	2.62828
		38.75	6.15613	106						1.30808	2.58609
		43.75	6.15613	106						1.3114	2.54924
		47.5	6.15613	106						1.31472	2.53695
		50	6.15613	106						1.31804	2.57304
		37.5	6.2253	106						1.32136	2.67683
		38.75	6.2253	106						1.32468	2.83686
		42.5	6.2253	106						1.328	3.0044
		43.75	6.2253	106						1.33132	3.12467
		47.5	6.2253	106						1.33464	3.16968
		37.5	6.29447	106						1.33796	3.14301
		38.75	6.29447	106						1.34128	3.06571
		42.5	6.29447	106						1.3446	2.96631
		43.75	6.29447	106						1.34792	2.88723
		47.5	6.29447	106						1.35124	2.88486
		60	6.36364	112						1.35456	2.99162
		62.5	6.36364	112						1.35788	3.17685
		63.75	6.36364	112						1.3612	3.35888
		38.75	6.36364	106						1.36452	3.45395
		42.5	6.36364	106						1.36784	3.40928
		57.5	6.43281	112						1.37116	3.21096
		58.75	6.43281	112						1.37448	2.89584
		60	6.43281	112						1.3778	2.55464
		37.5	6.43281	106						1.38112	2.29561
		38.75	6.43281	106						1.38444	2.18709
		53.75	6.50198	115						1.38776	2.23664
		55	6.50198	115						1.39108	2.41304
		56.25	6.50198	115						1.3944	2.66051
		57.5	6.50198	115						1.39772	2.89667
		58.75	6.50198	115						1.40104	3.03579
		53.75	6.57115	115						1.40436	3.02383
		55	6.57115	115						1.40768	2.8453
		56.25	6.57115	115						1.411	2.53401
		57.5	6.57115	115						1.41432	2.1909
		58.75	6.57115	115						1.41764	1.93852
		55	6.64032	115						1.42096	1.84322
		56.25	6.64032	115						1.42428	1.9041
		57.5	6.64032	112						1.4276	2.09517
		58.75	6.64032	112						1.43092	2.3823
		60	6.64032	112						1.43424	2.71014
		58.75	6.70949	112						1.43756	3.00683
		60	6.70949	112						1.44088	3.21271
		41.25	6.70949	106						1.4442	3.3065
		42.5	6.70949	106						1.44752	3.31051
		43.75	6.70949	106						1.45084	3.27437
		58.75	6.77866	112						1.45416	3.25622
		60	6.77866	112						1.45748	3.31398
		41.25	6.77866	106						1.4608	3.48009
		42.5	6.77866	106						1.46412	3.72053
		43.75	6.77866	106						1.46744	3.93853
		58.75	6.84783	112						1.47076	4.03146
		60	6.84783	112						1.47408	3.94933
		42.5	6.84783	106						1.4774	3.72658
		43.75	6.84783	106						1.48072	3.45974
		45	6.84783	106						1.48404	3.23097
		42.5	6.917	106						1.48736	3.06127
		43.75	6.917	106						1.49068	2.93014
		45	6.917	106						1.494	2.81351
		46.25	6.917	106						1.49732	2.70344
		47.5	6.917	106						1.50064	2.61028
		55	6.98617	128						1.50396	2.55739
		57.5	6.98617	128						1.50728	2.56918
		58.75	6.98617	128						1.5106	2.64589
		42.5	6.98617	106						1.51392	2.74737
		43.75	6.98617	106						1.51724	2.81822
		52.5	7.05534	128						1.52056	2.83226
		53.75	7.05534	128						1.52388	2.80885
		55	7.05534	128						1.5272	2.79628
		56.25	7.05534	128						1.53052	2.83389
		57.5	7.05534	128						1.53384	2.91483
		52.5	7.12451	128						1.53716	2.99116
		53.75	7.12451	128						1.54048	3.01992
		55	7.12451	128						1.5438	2.98776
		56.25	7.12451	128						1.54712	2.90392
		57.5	7.12451	128						1.55044	2.80032
		48.75	7.19368	128						1.55376	2.73272
		51.25	7.19368	128						1.55708	2.75545
		52.5	7.19368	128						1.5604	2.88848
		53.75	7.19368	128						1.56372	3.10533
		55	7.19368	128						1.56704	3.33384
		47.5	7.26285	128						1.57036	3.46835
		48.75	7.26285	128						1.57368	3.41054
		50	7.26285	128						1.577	3.14026
		51.25	7.26285	128						1.58032	2.76277
		52.5	7.26285	128						1.58364	2.45153
		56.25	7.33202	137						1.58696	2.32034
		57.5	7.33202	137						1.59028	2.37526
		48.75	7.33202	128						1.5936	2.56439
		50	7.33202	128						1.59692	2.82698
		51.25	7.33202	128						1.60024	3.10563
		53.75	7.40119	137						1.60356	3.34599
		55	7.40119	137						1.60688	3.51257
		56.25	7.40119	137						1.6102	3.61081
		57.5	7.40119	137						1.61352	3.67115
		58.75	7.40119	137						1.61684	3.71407
		51.25	7.47036	137						1.62016	3.74467
		52.5	7.47036	137						1.62348	3.77304
		53.75	7.47036	137						1.6268	3.81852
		55	7.47036	137						1.63012	3.88062
		56.25	7.47036	137						1.63344	3.91516
		51.25	7.53953	137						1.63676	3.85051
		52.5	7.53953	137						1.64008	3.63534
		53.75	7.53953	137						1.6434	3.27743
		55	7.53953	137						1.64672	2.85499
		56.25	7.53953	137						1.65004	2.49935
		51.25	7.6087	137						1.65336	2.33951
		52.5	7.6087	137						1.65668	2.41769
		53.75	7.6087	137						1.66	2.64769
		55	7.6087	137						1.66332	2.85715
		56.25	7.6087	137						1.66664	2.8852
		47.5	7.67787	141						1.66996	2.67988
		51.25	7.67787	137						1.67328	2.32455
		52.5	7.67787	137						1.6766	1.97241
		53.75	7.67787	137						1.67992	1.75407
		55	7.67787	137						1.68324	1.72162
		47.5	7.74704	141						1.68656	1.84475
		51.25	7.74704	137						1.68988	2.04596
		52.5	7.74704	137						1.6932	2.25366
		53.75	7.74704	137						1.69652	2.436
		55	7.74704	137						1.69984	2.59804
		47.5	7.81621	141						1.70316	2.75656
		51.25	7.81621	137						1.70648	2.91793
		52.5	7.81621	137						1.7098	3.0628
		53.75	7.81621	137						1.71312	3.15511
		55	7.81621	137						1.71644	3.17965
		51.25	7.88538	137						1.71976	3.16489
		52.5	7.88538	137						1.72308	3.15324
		53.75	7.88538	137						1.7264	3.15847
		55	7.88538	137						1.72972	3.16884
		56.25	7.88538	137						1.73304	3.1934
		52.5	7.95455	137						1.73636	3.27373
		53.75	7.95455	137						1.73968	3.43915
		55	7.95455	137						1.743	3.66754
		56.25	7.95455	137						1.74632	3.89607
		57.5	7.95455	137						1.74964	4.05804
		52.5	8.02372	137						1.75296	4.11767
		53.75	8.02372	137						1.75628	4.08409
		55	8.02372	137						1.7596	4.00634
		56.25	8.02372	137						1.76292	3.95849
		57.5	8.02372	137						1.76624	3.99914
		53.75	8.09289	137						1.76956	4.11858
		55	8.09289	137						1.77288	4.2288
		56.25	8.09289	137						1.7762	4.22989
		57.5	8.09289	137						1.77952	4.10022
		58.75	8.09289	137						1.78284	3.92036
		52.5	8.16206	134						1.78616	3.79781
		53.75	8.16206	134						1.78948	3.76115
		55	8.16206	134						1.7928	3.7521
		56.25	8.16206	134						1.79612	3.71322
		57.5	8.16206	134						1.79944	3.63357
		53.75	8.23123	134						1.80276	3.52779
		55	8.23123	134						1.80608	3.42217
		56.25	8.23123	134						1.8094	3.37089
		57.5	8.23123	134						1.81272	3.44675
		50	8.23123	119						1.81604	3.68172
		53.75	8.3004	134						1.81936	4.01645
		55	8.3004	134						1.82268	4.30625
		56.25	8.3004	134						1.826	4.3703
		57.5	8.3004	134						1.82932	4.06703
		58.75	8.3004	134						1.83264	3.39766
		55	8.36957	134						1.83596	2.5635
		56.25	8.36957	134						1.83928	1.86028
		57.5	8.36957	134						1.8426	1.48697
		58.75	8.36957	134						1.84592	1.47483
		51.25	8.36957	119						1.84924	1.74064
		53.75	8.43874	162						1.85256	2.15919
		55	8.43874	134						1.85588	2.61407
		56.25	8.43874	134						1.8592	3.01623
		57.5	8.43874	134						1.86252	3.31187
		58.75	8.43874	134						1.86584	3.48881
		53.75	8.50791	162						1.86916	3.56858
		56.25	8.50791	134						1.87248	3.57546
		57.5	8.50791	134						1.8758	3.52986
		52.5	8.50791	119						1.87912	3.47695
		55	8.50791	27						1.88244	3.48436
		53.75	8.57708	162						1.88576	3.59021
		55	8.57708	134						1.88908	3.7735
		56.25	8.57708	134						1.8924	3.98964
		52.5	8.57708	114						1.89572	4.22232
		57.5	8.57708	27						1.89904	4.4879
		53.75	8.64625	162						1.90236	4.79337
		55	8.64625	162						1.90568	5.1026
		56.25	8.64625	27						1.909	5.33691
		57.5	8.64625	27						1.91232	5.4155
		58.75	8.64625	27						1.91564	5.32844
		55	8.71542	162						1.91896	5.14326
		53.75	8.71542	114						1.92228	4.91848
		56.25	8.71542	27						1.9256	4.65897
		57.5	8.71542	27						1.92892	4.36887
		58.75	8.71542	27						1.93224	4.10212
		55	8.78459	117						1.93556	3.93134
		56.25	8.78459	27						1.93888	3.90401
		57.5	8.78459	27						1.9422	4.03103
		58.75	8.78459	27						1.94552	4.29256
		60	8.78459	27						1.94884	4.63938
		56.25	8.85376	67						1.95216	5.00975
		57.5	8.85376	67						1.95548	5.36592
		55	8.85376	28						1.9588	5.70314
		58.75	8.85376	27						1.96212	6.00898
		60	8.85376	27						1.96544	6.22339
		56.25	8.92293	67						1.96876	6.25231
		57.5	8.92293	67						1.97208	6.03864
		58.75	8.92293	67						1.9754	5.6384
		60	8.92293	27						1.97872	5.23292
		61.25	8.92293	27						1.98204	5.0144
		56.25	8.9921	67						1.98536	5.04947
		57.5	8.9921	67						1.98868	5.25631
		58.75	8.9921	67						1.992	5.47503
		60	8.9921	27						1.99532	5.5873
		61.25	8.9921	27						1.99864	5.61186
		57.5	9.06127	67						2.00196	5.6687
		58.75	9.06127	67						2.00528	5.85997
		60	9.06127	67						2.0086	6.1974
		61.25	9.06127	27						2.01192	6.60277
		62.5	9.06127	27						2.01524	6.93836
		57.5	9.13044	67						2.01856	7.07028
		58.75	9.13044	67						2.02188	6.96184
		60	9.13044	67						2.0252	6.70928
		61.25	9.13044	27						2.02852	6.46711
		62.5	9.13044	27						2.03184	6.33514
		57.5	9.19961	67						2.03516	6.31549
		58.75	9.19961	67						2.03848	6.3548
		60	9.19961	67						2.0418	6.39161
		61.25	9.19961	27						2.04512	6.37262
		62.5	9.19961	27						2.04844	6.25207
		58.75	9.26878	67						2.05176	6.00699
		60	9.26878	67						2.05508	5.68113
		62.5	9.26878	67						2.0584	5.39899
		61.25	9.26878	27						2.06172	5.29465
		63.75	9.26878	27						2.06504	5.41674
		58.75	9.33795	67						2.06836	5.70571
		60	9.33795	67						2.07168	6.05631
		62.5	9.33795	67						2.075	6.39487
		61.25	9.33795	27						2.07832	6.70061
		63.75	9.33795	27						2.08164	6.97381
		60	9.40712	67						2.08496	7.17856
		62.5	9.40712	67						2.08828	7.23339
		63.75	9.40712	67						2.0916	7.0666
		61.25	9.40712	27						2.09492	6.69534
		65	9.40712	27						2.09824	6.23129
		60	9.47629	67						2.10156	5.82104
		62.5	9.47629	67						2.10488	5.55693
		63.75	9.47629	67						2.1082	5.42285
		61.25	9.47629	27						2.11152	5.31443
		65	9.47629	27						2.11484	5.12694
		62.5	9.54546	67						2.11816	4.84941
		63.75	9.54546	67						2.12148	4.56386
		61.25	9.54546	66						2.1248	4.34165
		65	9.54546	27						2.12812	4.1776
		66.25	9.54546	27						2.13144	4.02479
		61.25	9.61463	89						2.13476	3.85929
		63.75	9.61463	89						2.13808	3.72908
		65	9.61463	89						2.1414	3.75018
		62.5	9.61463	67						2.14472	4.03051
		66.25	9.61463	27						2.14804	4.56808
		63.75	9.6838	89						2.15136	5.20151
		65	9.6838	89						2.15468	5.66514
		62.5	9.6838	67						2.158	5.71605
		66.25	9.6838	27						2.16132	5.28404
		67.5	9.6838	27						2.16464	4.52879
		63.75	9.75297	89						2.16796	3.71283
		65	9.75297	89						2.17128	3.02769
		66.25	9.75297	89						2.1746	2.56092
		62.5	9.75297	67						2.17792	2.34958
		67.5	9.75297	27						2.18124	2.39733
		63.75	9.82214	89						2.18456	2.64657
		65	9.82214	89						2.18788	2.9795
		66.25	9.82214	89						2.1912	3.27034
		67.5	9.82214	27						2.19452	3.44154
		68.75	9.82214	27						2.19784	3.4728
		63.75	9.89131	121						2.20116	3.36417
		65	9.89131	89						2.20448	3.12364
		66.25	9.89131	89						2.2078	2.80173
		77.5	9.89131	49						2.21112	2.50008
		67.5	9.89131	27						2.21444	2.30069
		65	9.96048	89						2.21776	2.21748
		66.25	9.96048	89						2.22108	2.24052
		75	9.96048	53						2.2244	2.38408
		76.25	9.96048	53						2.22772	2.65332
		77.5	9.96048	53						2.23104	2.98123
		65	10.0297	121						2.23436	3.23424
		72.5	10.0297	53						2.23768	3.29026
		73.75	10.0297	53						2.241	3.1262
		75	10.0297	53						2.24432	2.84183
		76.25	10.0297	53						2.24764	2.58864
		71.25	10.0988	53						2.25096	2.4603
		72.5	10.0988	53						2.25428	2.45331
		73.75	10.0988	53						2.2576	2.49632
		75	10.0988	53						2.26092	2.49584
		76.25	10.0988	53						2.26424	2.39097
		68.75	10.168	53						2.26756	2.17879
		70	10.168	53						2.27088	1.89597
		71.25	10.168	53						2.2742	1.58949
		72.5	10.168	53						2.27752	1.31102
		73.75	10.168	53						2.28084	1.11953
		68.75	10.2372	53						2.28416	1.06135
		70	10.2372	53						2.28748	1.14437
		71.25	10.2372	53						2.2908	1.34785
		72.5	10.2372	53						2.29412	1.65849
		73.75	10.2372	53						2.29744	2.01713
		67.5	10.3063	53						2.30076	2.34807
		68.75	10.3063	53						2.30408	2.54994
		70	10.3063	53						2.3074	2.56782
		71.25	10.3063	53						2.31072	2.44735
		72.5	10.3063	53						2.31404	2.29495
		68.75	10.3755	53						2.31736	2.19518
		70	10.3755	53						2.32068	2.18216
		71.25	10.3755	53						2.324	2.27913
		72.5	10.3755	53						2.32732	2.51882
		73.75	10.3755	53						2.33064	2.91219
		68.75	10.4447	53						2.33396	3.42008
		70	10.4447	53						2.33728	3.97133
		71.25	10.4447	53						2.3406	4.48509
		72.5	10.4447	53						2.34392	4.88668
		73.75	10.4447	53						2.34724	5.13336
		68.75	10.5138	53						2.35056	5.24005
		70	10.5138	53						2.35388	5.27493
		71.25	10.5138	53						2.3572	5.33124
		72.5	10.5138	53						2.36052	5.48729
		73.75	10.5138	53						2.36384	5.7715
		70	10.583	53						2.36716	6.1462
		71.25	10.583	53						2.37048	6.53088
		72.5	10.583	53						2.3738	6.8576
		73.75	10.583	53						2.37712	7.11902
		75	10.583	53						2.38044	7.36347
		71.25	10.6522	53						2.38376	7.6481
		72.5	10.6522	53						2.38708	7.97643
		73.75	10.6522	53						2.3904	8.25387
		75	10.6522	53						2.39372	8.3073
		76.25	10.6522	53						2.39704	8.00668
		73.75	10.7213	53						2.40036	7.39102
		75	10.7213	53						2.40368	6.66112
		71.25	10.7213	46						2.407	6.03518
		72.5	10.7213	46						2.41032	5.60311
		76.25	10.7213	46						2.41364	5.32623
		72.5	10.7905	89						2.41696	5.13599
		73.75	10.7905	53						2.42028	5.01544
		75	10.7905	46						2.4236	4.99245
		76.25	10.7905	46						2.42692	5.08584
		77.5	10.7905	46						2.43024	5.25957
		72.5	10.8597	89						2.43356	5.44424
		73.75	10.8597	89						2.43688	5.57789
		77.5	10.8597	52						2.4402	5.62932
		75	10.8597	17						2.44352	5.59179
		76.25	10.8597	17						2.44684	5.46858
		73.75	10.9289	89						2.45016	5.27087
		72.5	10.9289	37						2.45348	5.03905
		75	10.9289	17						2.4568	4.85094
		76.25	10.9289	17						2.46012	4.78479
		77.5	10.9289	17						2.46344	4.86458
		73.75	10.998	37						2.46676	5.04366
		75	10.998	17						2.47008	5.23488
		76.25	10.998	17						2.4734	5.3566
		77.5	10.998	17						2.47672	5.36313
		67.5	10.998	8						2.48004	5.25122
		73.75	11.0672	37						2.48336	5.05694
		75	11.0672	37						2.48668	4.85374
		77.5	11.0672	28						2.49	4.73894
		76.25	11.0672	17						2.49332	4.79128
		67.5	11.0672	8						2.49664	5.01394
		75	11.1364	37						2.49996	5.32089
		76.25	11.1364	17						2.50328	5.5909
		77.5	11.1364	17						2.5066	5.72819
		68.75	11.1364	8						2.50992	5.69168
		70	11.1364	8						2.51324	5.51052
		76.25	11.2055	17						2.51656	5.26338
		77.5	11.2055	17						2.51988	5.03211
		68.75	11.2055	8						2.5232	4.88142
		70	11.2055	8						2.52652	4.85785
		71.25	11.2055	8						2.52984	4.9741
		76.25	11.2747	17						2.53316	5.18865
		77.5	11.2747	17						2.53648	5.4198
		68.75	11.2747	8						2.5398	5.60636
		70	11.2747	8						2.54312	5.76272
		71.25	11.2747	8						2.54644	5.95176
		77.5	11.3439	17						2.54976	6.1976
		70	11.3439	8						2.55308	6.42762
		71.25	11.3439	8						2.5564	6.52803
		72.5	11.3439	8						2.55972	6.40735
		76.25	11.3439	5						2.56304	6.1038
		77.5	11.4131	17						2.56636	5.78805
		70	11.4131	8						2.56968	5.65602
		71.25	11.4131	8						2.573	5.82878
		72.5	11.4131	8						2.57632	6.3038
		76.25	11.4131	5						2.57964	6.93705
		71.25	11.4822	8						2.58296	7.48591
		72.5	11.4822	8						2.58628	7.75607
		77.5	11.4822	5						2.5896	7.74732
		67.5	11.4822	3						2.59292	7.61459
		68.75	11.4822	3						2.59624	7.51435
		71.25	11.5514	8						2.59956	7.50441
		72.5	11.5514	8						2.60288	7.53423
		73.75	11.5514	8						2.6062	7.50393
		77.5	11.5514	5						2.60952	7.33871
		67.5	11.5514	3						2.61284	7.01827
		71.25	11.6206	8						2.61616	6.5758
		72.5	11.6206	8						2.61948	6.0928
		73.75	11.6206	8						2.6228	5.65441
		77.5	11.6206	5						2.62612	5.2829
		68.75	11.6206	3						2.62944	4.94028
		72.5	11.6897	8						2.63276	4.59507
		73.75	11.6897	8						2.63608	4.26089
		75	11.6897	8						2.6394	3.96572
		68.75	11.6897	3						2.64272	3.71463
		70	11.6897	3						2.64604	3.49583
		72.5	11.7589	8						2.64936	3.31101
		73.75	11.7589	8						2.65268	3.17787
		75	11.7589	8						2.656	3.10032
		70	11.7589	3						2.65932	3.04918
		71.25	11.7589	3						2.66264	2.997
		72.5	11.8281	8						2.66596	2.96837
		73.75	11.8281	8						2.66928	3.02506
		75	11.8281	8						2.6726	3.1986
		70	11.8281	3						2.67592	3.44595
		71.25	11.8281	3						2.67924	3.66264
		73.75	11.8972	8						2.68256	3.75057
		75	11.8972	8						2.68588	3.67938
		76.25	11.8972	8						2.6892	3.48897
		70	11.8972	3						2.69252	3.25589
		71.25	11.8972	3						2.69584	3.05639
		73.75	11.9664	8						2.69916	2.93442
		75	11.9664	8						2.70248	2.89374
		76.25	11.9664	8						2.7058	2.92527
		71.25	11.9664	3						2.70912	3.04728
		72.5	11.9664	3						2.71244	3.3176
		73.75	12.0356	8						2.71576	3.79069
		75	12.0356	8						2.71908	4.43218
		76.25	12.0356	8						2.7224	5.0806
		77.5	12.0356	8						2.72572	5.56638
		71.25	12.0356	3						2.72904	5.8677
		75	12.1047	8						2.73236	6.07463
		76.25	12.1047	8						2.73568	6.23301
		77.5	12.1047	8						2.739	6.28924
		71.25	12.1047	3						2.74232	6.1477
		72.5	12.1047	3						2.74564	5.74837
		75	12.1739	8						2.74896	5.14132
		76.25	12.1739	8						2.75228	4.51298
		77.5	12.1739	8						2.7556	4.09972
		71.25	12.1739	3						2.75892	4.0396
		72.5	12.1739	3						2.76224	4.30627
		75	12.2431	8						2.76556	4.7498
		76.25	12.2431	8						2.76888	5.18288
		77.5	12.2431	8						2.7722	5.47814
		72.5	12.2431	3						2.77552	5.61479
		73.75	12.2431	3						2.77884	5.64499
		76.25	12.3123	8						2.78216	5.63401
		77.5	12.3123	8						2.78548	5.62745
		72.5	12.3123	3						2.7888	5.64812
		73.75	12.3123	3						2.79212	5.69843
		75	12.3123	3						2.79544	5.7465
		76.25	12.3814	8						2.79876	5.71488
		77.5	12.3814	8						2.80208	5.51751
		72.5	12.3814	3						2.8054	5.14653
		73.75	12.3814	3						2.80872	4.73134
		75	12.3814	3						2.81204	4.46113
		76.25	12.4506	8						2.81536	4.44893
		77.5	12.4506	8						2.81868	4.69717
		73.75	12.4506	3						2.822	5.13071
		75	12.4506	3						2.82532	5.61256
		72.5	12.4506	1						2.82864	5.96807
		77.5	12.5198	8						2.83196	6.06543
		73.75	12.5198	3						2.83528	5.91388
		75	12.5198	3						2.8386	5.66593
		76.25	12.5198	3						2.84192	5.5003
		72.5	12.5198	1						2.84524	5.50614
		77.5	12.5889	8						2.84856	5.65823
		73.75	12.5889	3						2.85188	5.86806
		75	12.5889	3						2.8552	6.05333
		76.25	12.5889	3						2.85852	6.16371
		6.25	12.5889	0						2.86184	6.16622
		77.5	12.6581	8						2.86516	6.04434
		75	12.6581	3						2.86848	5.82432
		76.25	12.6581	3						2.8718	5.58428
		73.75	12.6581	1						2.87512	5.40806
		6.25	12.6581	0						2.87844	5.3383
		75	12.7273	3						2.88176	5.37852
		76.25	12.7273	3						2.88508	5.51674
		77.5	12.7273	3						2.8884	5.72881
		73.75	12.7273	1						2.89172	5.96798
		6.25	12.7273	0						2.89504	6.17473
		75	12.7965	3						2.89836	6.30582
		76.25	12.7965	3						2.90168	6.34132
		77.5	12.7965	3						2.905	6.27541
		73.75	12.7965	1						2.90832	6.13845
		6.25	12.7965	0						2.91164	6.01065
		76.25	12.8656	3						2.91496	5.97941
		77.5	12.8656	3						2.91828	6.08966
		75	12.8656	1						2.9216	6.33628
		6.25	12.8656	0						2.92492	6.68396
		7.5	12.8656	0						2.92824	7.08335
		76.25	12.9348	3						2.93156	7.46249
		77.5	12.9348	3						2.93488	7.71032
		75	12.9348	1						2.9382	7.71481
		6.25	12.9348	0						2.94152	7.44098
		7.5	12.9348	0						2.94484	6.96398
		76.25	13.004	3						2.94816	6.41123
		77.5	13.004	3						2.95148	5.88103
		75	13.004	1						2.9548	5.43771
		6.25	13.004	0						2.95812	5.1348
		7.5	13.004	0						2.96144	4.99031
										2.96476	4.95938
										2.96808	4.97105
										2.9714	5.00373
										2.97472	5.10649
										2.97804	5.33277
										2.98136	5.67119
										2.98468	6.03535
										2.988	6.29704
										2.99132	6.35245
										2.99464	6.19152
										2.99796	5.89287
										3.00128	5.5297
										3.0046	5.1241
										3.00792	4.70653
										3.01124	4.35874
										3.01456	4.16531
										3.01788	4.1558
										3.0212	4.30217
										3.02452	4.5347
										3.02784	4.7481
										3.03116	4.82156
										3.03448	4.67352
										3.0378	4.31823
										3.04112	3.87937
										3.04444	3.53109
										3.04776	3.40852
										3.05108	3.55221
										3.0544	3.903
										3.05772	4.33152
										3.06104	4.68419
										3.06436	4.84828
										3.06768	4.81516
										3.071	4.67396
										3.07432	4.53064
										3.07764	4.4308
										3.08096	4.36726
										3.08428	4.34097
										3.0876	4.36969
										3.09092	4.44201
										3.09424	4.51188
										3.09756	4.5551
										3.10088	4.60211
										3.1042	4.71292
										3.10752	4.93511
										3.11084	5.27397
										3.11416	5.66613
										3.11748	5.97087
										3.1208	6.04238
										3.12412	5.87178
										3.12744	5.62688
										3.13076	5.51676
										3.13408	5.66586
										3.1374	6.09232
										3.14072	6.74237
										3.14404	7.53438
										3.14736	8.36337
										3.15068	9.10037
										3.154	9.65835
										3.15732	10.0277
										3.16064	10.219
										3.16396	10.213
										3.16728	9.97611
										3.1706	9.50526
										3.17392	8.84399
										3.17724	8.06125
										3.18056	7.22154
										3.18388	6.38154
										3.1872	5.63009
										3.19052	5.09998
										3.19384	4.87079
										3.19716	4.89856
										3.20048	5.08452
										3.2038	5.34163
										3.20712	5.59456
										3.21044	5.78448
										3.21376	5.88899
										3.21708	5.93503
										3.2204	5.98917
										3.22372	6.11157
										3.22704	6.30721
										3.23036	6.52202
										3.23368	6.66468
										3.237	6.65614
										3.24032	6.50925
										3.24364	6.34813
										3.24696	6.33017
										3.25028	6.56141
										3.2536	7.0388
										3.25692	7.63164
										3.26024	8.13317
										3.26356	8.35967
										3.26688	8.23914
										3.2702	7.85411
										3.27352	7.37304
										3.27684	6.91215
										3.28016	6.47656
										3.28348	6.01564
										3.2868	5.5229
										3.29012	5.0769
										3.29344	4.78019
										3.29676	4.69317
										3.30008	4.81309
										3.3034	5.08092
										3.30672	5.40137
										3.31004	5.67471
										3.31336	5.8329
										3.31668	5.86847
										3.32	5.84178
										3.32332	5.82857
										3.32664	5.82613
										3.32996	5.73271
										3.33328	5.46676
										3.3366	5.10138
										3.33992	4.81521
										3.34324	4.71163
										3.34656	4.76578
										3.34988	4.92333
										3.3532	5.18372
										3.35652	5.58915
										3.35984	6.14119
										3.36316	6.7259
										3.36648	7.14592
										3.3698	7.25417
										3.37312	7.06288
										3.37644	6.73865
										3.37976	6.4911
										3.38308	6.44821
										3.3864	6.57462
										3.38972	6.66468
										3.39304	6.48295
										3.39636	5.97075
										3.39968	5.29164
										3.403	4.68192
										3.40632	4.30524
										3.40964	4.20976
										3.41296	4.33384
										3.41628	4.54346
										3.4196	4.70309
										3.42292	4.74425
										3.42624	4.68265
										3.42956	4.55149
										3.43288	4.33921
										3.4362	4.02465
										3.43952	3.64974
										3.44284	3.31895
										3.44616	3.12356
										3.44948	3.08938
										3.4528	3.17027
										3.45612	3.26868
										3.45944	3.28928
										3.46276	3.21307
										3.46608	3.11212
										3.4694	3.07935
										3.47272	3.16079
										3.47604	3.34909
										3.47936	3.61282
										3.48268	3.92083
										3.486	4.25065
										3.48932	4.58565
										3.49264	4.90455
										3.49596	5.16795
										3.49928	5.31559
										3.5026	5.28998
										3.50592	5.07935
										3.50924	4.73642
										3.51256	4.35727
										3.51588	4.03627
										3.5192	3.84403
										3.52252	3.85029
										3.52584	4.13175
										3.52916	4.71324
										3.53248	5.50143
										3.5358	6.29486
										3.53912	6.87366
										3.54244	7.11353
										3.54576	7.0412
										3.54908	6.78881
										3.5524	6.50518
										3.55572	6.30177
										3.55904	6.24336
										3.56236	6.33675
										3.56568	6.51839
										3.569	6.68498
										3.57232	6.75959
										3.57564	6.72386
										3.57896	6.5887
										3.58228	6.36068
										3.5856	6.07185
										3.58892	5.81424
										3.59224	5.69325
										3.59556	5.75386
										3.59888	5.98836
										3.6022	6.39648
										3.60552	6.98344
										3.60884	7.68709
										3.61216	8.36785
										3.61548	8.9038
										3.6188	9.26233
										3.62212	9.46915
										3.62544	9.51942
										3.62876	9.33976
										3.63208	8.85305
										3.6354	8.09801
										3.63872	7.2871
										3.64204	6.66955
										3.64536	6.34427
										3.64868	6.26373
										3.652	6.34699
										3.65532	6.54042
										3.65864	6.79457
										3.66196	7.00375
										3.66528	7.00026
										3.6686	6.655
										3.67192	6.0182
										3.67524	5.33124
										3.67856	4.85165
										3.68188	4.7081
										3.6852	4.89487
										3.68852	5.29552
										3.69184	5.70657
										3.69516	5.93435
										3.69848	5.9235
										3.7018	5.75846
										3.70512	5.55599
										3.70844	5.39972
										3.71176	5.3416
										3.71508	5.40008
										3.7184	5.5374
										3.72172	5.65866
										3.72504	5.65577
										3.72836	5.49386
										3.73168	5.26399
										3.735	5.1052
										3.73832	5.08686
										3.74164	5.18133
										3.74496	5.31329
										3.74828	5.4044
										3.7516	5.35633
										3.75492	5.05521
										3.75824	4.50685
										3.76156	3.94211
										3.76488	3.6479
										3.7682	3.73687
										3.77152	4.14133
										3.77484	4.71404
										3.77816	5.29656
										3.78148	5.77107
										3.7848	6.10297
										3.78812	6.32361
										3.79144	6.48683
										3.79476	6.66225
										3.79808	6.91996
										3.8014	7.26986
										3.80472	7.627
										3.80804	7.85375
										3.81136	7.8394
										3.81468	7.56032
										3.818	7.07121
										3.82132	6.45312
										3.82464	5.81437
										3.82796	5.31419
										3.83128	5.11944
										3.8346	5.33872
										3.83792	5.96876
										3.84124	6.83215
										3.84456	7.61226
										3.84788	8.04456
										3.8512	8.0381
										3.85452	7.62946
										3.85784	6.94137
										3.86116	6.17301
										3.86448	5.54009
										3.8678	5.20633
										3.87112	5.25207
										3.87444	5.64714
										3.87776	6.23674
										3.88108	6.78324
										3.8844	7.05786
										3.88772	6.93635
										3.89104	6.46536
										3.89436	5.86721
										3.89768	5.45665
										3.901	5.49186
										3.90432	6.04821
										3.90764	6.99367
										3.91096	8.04554
										3.91428	8.85719
										3.9176	9.17514
										3.92092	9.01472
										3.92424	8.61877
										3.92756	8.20319
										3.93088	7.8027
										3.9342	7.34497
										3.93752	6.79009
										3.94084	6.19851
										3.94416	5.70686
										3.94748	5.45816
										3.9508	5.52483
										3.95412	5.8581
										3.95744	6.30242
										3.96076	6.67535
										3.96408	6.87161
										3.9674	6.91347
										3.97072	6.90347
										3.97404	6.94214
										3.97736	7.0801
										3.98068	7.3064
										3.984	7.55025
										3.98732	7.69748
										3.99064	7.62783
										3.99396	7.28453
										3.99728	6.75922
										4.0006	6.2713
										4.00392	5.98976
										4.00724	5.91444
										4.01056	5.92998
										4.01388	5.91754
										4.0172	5.82816
										4.02052	5.69484
										4.02384	5.5767
										4.02716	5.49174
										4.03048	5.40971
										4.0338	5.30783
										4.03712	5.20681
										4.04044	5.1342
										4.04376	5.06704
										4.04708	4.96255
										4.0504	4.83313
										4.05372	4.77086
										4.05704	4.8747
										4.06036	5.16612
										4.06368	5.58746
										4.067	6.0414
										4.07032	6.44014
										4.07364	6.70474
										4.07696	6.78822
										4.08028	6.69771
										4.0836	6.48946
										4.08692	6.22467
										4.09024	5.94425
										4.09356	5.68428
										4.09688	5.51772
										4.1002	5.53488
										4.10352	5.74108
										4.10684	5.97658
										4.11016	5.98674
										4.11348	5.58776
										4.1168	4.81556
										4.12012	3.92703
										4.12344	3.19697
										4.12676	2.77189
										4.13008	2.71595
										4.1334	3.0463
										4.13672	3.6703
										4.14004	4.37073
										4.14336	4.905
										4.14668	5.11628
										4.15	5.00167
										4.15332	4.6845
										4.15664	4.28685
										4.15996	3.87005
										4.16328	3.50068
										4.1666	3.29092
										4.16992	3.34165
										4.17324	3.64686
										4.17656	4.06078
										4.17988	4.37468
										4.1832	4.44623
										4.18652	4.28991
										4.18984	4.0697
										4.19316	3.9848
										4.19648	4.117
										4.1998	4.38091
										4.20312	4.60875
										4.20644	4.67183
										4.20976	4.56513
										4.21308	4.40946
										4.2164	4.37324
										4.21972	4.57153
										4.22304	5.02095
										4.22636	5.66992
										4.22968	6.4339
										4.233	7.22469
										4.23632	7.97306
										4.23964	8.67806
										4.24296	9.33749
										4.24628	9.90223
										4.2496	10.2796
										4.25292	10.3969
										4.25624	10.2535
										4.25956	9.90771
										4.26288	9.42441
										4.2662	8.84408
										4.26952	8.21039
										4.27284	7.61951
										4.27616	7.20027
										4.27948	7.04266
										4.2828	7.11648
										4.28612	7.30299
										4.28944	7.48249
										4.29276	7.60343
										4.29608	7.67449
										4.2994	7.72172
										4.30272	7.74933
										4.30604	7.71822
										4.30936	7.5673
										4.31268	7.27101
										4.316	6.87907
										4.31932	6.48643
										4.32264	6.15981
										4.32596	5.90086
										4.32928	5.68783
										4.3326	5.54915
										4.33592	5.57089
										4.33924	5.82521
										4.34256	6.30359
										4.34588	6.8945
										4.3492	7.3974
										4.35252	7.59906
										4.35584	7.38847
										4.35916	6.83052
										4.36248	6.13923
										4.3658	5.55327
										4.36912	5.21967
										4.37244	5.15889
										4.37576	5.28472
										4.37908	5.43088
										4.3824	5.40753
										4.38572	5.10158
										4.38904	4.59663
										4.39236	4.16573
										4.39568	4.11075
										4.399	4.57647
										4.40232	5.48473
										4.40564	6.58798
										4.40896	7.59085
										4.41228	8.30142
										4.4156	8.69453
										4.41892	8.81808
										4.42224	8.68435
										4.42556	8.26274
										4.42888	7.56373
										4.4322	6.74965
										4.43552	6.10424
										4.43884	5.84732
										4.44216	6.02177
										4.44548	6.50793
										4.4488	7.08348
										4.45212	7.49949
										4.45544	7.58825
										4.45876	7.35875
										4.46208	6.97839
										4.4654	6.62468
										4.46872	6.37758
										4.47204	6.25032
										4.47536	6.25514
										4.47868	6.38818
										4.482	6.57576
										4.48532	6.69628
										4.48864	6.67804
										4.49196	6.57686
										4.49528	6.55649
										4.4986	6.76314
										4.50192	7.18351
										4.50524	7.61334
										4.50856	7.77177
										4.51188	7.50796
										4.5152	6.92502
										4.51852	6.29394
										4.52184	5.84512
										4.52516	5.63898
										4.52848	5.60449
										4.5318	5.64965
										4.53512	5.73737
										4.53844	5.89245
										4.54176	6.15937
										4.54508	6.55753
										4.5484	7.08297
										4.55172	7.73533
										4.55504	8.52973
										4.55836	9.4918
										4.56168	10.6178
										4.565	11.7974
										4.56832	12.8049
										4.57164	13.3657
										4.57496	13.2929
										4.57828	12.6663
										4.5816	11.7976
										4.58492	10.9928
										4.58824	10.3529
										4.59156	9.9362
										4.59488	9.61684
										4.5982	9.25692
										4.60152	8.75046
										4.60484	8.06803
										4.60816	7.28938
										4.61148	6.5692
										4.6148	6.06122
										4.61812	5.88205
										4.62144	6.09703
										4.62476	6.68887
										4.62808	7.53247
										4.6314	8.42527
										4.63472	9.16469
										4.63804	9.6444
										4.64136	9.90967
										4.64468	10.1156
										4.648	10.4132
										4.65132	10.8568
										4.65464	11.3732
										4.65796	11.8022
										4.66128	12.018
										4.6646	11.9766
										4.66792	11.7388
										4.67124	11.4183
										4.67456	11.1029
										4.67788	10.7997
										4.6812	10.441
										4.68452	9.93717
										4.68784	9.2787
										4.69116	8.56921
										4.69448	7.96815
										4.6978	7.58438
										4.70112	7.41723
										4.70444	7.39332
										4.70776	7.42793
										4.71108	7.46244
										4.7144	7.49319
										4.71772	7.57795
										4.72104	7.79435
										4.72436	8.18103
										4.72768	8.69517
										4.731	9.21744
										4.73432	9.61111
										4.73764	9.7959
										4.74096	9.77187
										4.74428	9.59403
										4.7476	9.34715
										4.75092	9.12269
										4.75424	8.98933
										4.75756	8.97428
										4.76088	9.06512
										4.7642	9.22757
										4.76752	9.43202
										4.77084	9.66173
										4.77416	9.8895
										4.77748	10.0559
										4.7808	10.0919
										4.78412	9.9705
										4.78744	9.73311
										4.79076	9.47893
										4.79408	9.33693
										4.7974	9.4103
										4.80072	9.69297
										4.80404	10.0482
										4.80736	10.3016
										4.81068	10.3349
										4.814	10.1092
										4.81732	9.66157
										4.82064	9.09812
										4.82396	8.55764
										4.82728	8.1599
										4.8306	7.97509
										4.83392	8.01747
										4.83724	8.26384
										4.84056	8.68499
										4.84388	9.23663
										4.8472	9.7586
										4.85052	10.1549
										4.85384	10.2935
										4.85716	10.1062
										4.86048	9.63016
										4.8638	8.99024
										4.86712	8.32345
										4.87044	7.72126
										4.87376	7.23631
										4.87708	6.90811
										4.8804	6.75356
										4.88372	6.75159
										4.88704	6.85499
										4.89036	7.01814
										4.89368	7.21624
										4.897	7.44259
										4.90032	7.68199
										4.90364	7.88997
										4.90696	8.02006
										4.91028	8.07244
										4.9136	8.09522
										4.91692	8.14757
										4.92024	8.26914
										4.92356	8.46822
										4.92688	8.7262
										4.9302	9.02313
										4.93352	9.35355
										4.93684	9.71877
										4.94016	10.1153
										4.94348	10.532
										4.9468	10.9285
										4.95012	11.2159
										4.95344	11.3011
										4.95676	11.1488
										4.96008	10.7719
										4.9634	10.2022
										4.96672	9.52402
										4.97004	8.88964
										4.97336	8.44316
										4.97668	8.23939
										4.98	8.23781
										4.98332	8.3454
										4.98664	8.46328
										4.98996	8.52932
										4.99328	8.54395
										4.9966	8.54951
										4.99992	8.57953
										5.00324	8.63283
										5.00656	8.69847
										5.00988	8.79502
										5.0132	8.95477
										5.01652	9.17103
										5.01984	9.38998
										5.02316	9.54503
										5.02648	9.58451
										5.0298	9.47241
										5.03312	9.19276
										5.03644	8.78006
										5.03976	8.33307
										5.04308	7.97641
										5.0464	7.79125
										5.04972	7.78019
										5.05304	7.89722
										5.05636	8.11159
										5.05968	8.4329
										5.063	8.85933
										5.06632	9.31893
										5.06964	9.70137
										5.07296	9.95447
										5.07628	10.1175
										5.0796	10.2449
										5.08292	10.3172
										5.08624	10.2603
										5.08956	10.043
										5.09288	9.71284
										5.0962	9.33979
										5.09952	8.9617
										5.10284	8.59499
										5.10616	8.27431
										5.10948	8.06947
										5.1128	8.0559
										5.11612	8.2555
										5.11944	8.58513
										5.12276	8.85403
										5.12608	8.85648
										5.1294	8.52468
										5.13272	7.97421
										5.13604	7.4152
										5.13936	7.04472
										5.14268	6.95184
										5.146	7.08485
										5.14932	7.30984
										5.15264	7.50199
										5.15596	7.60884
										5.15928	7.64121
										5.1626	7.61671
										5.16592	7.54776
										5.16924	7.46615
										5.17256	7.41395
										5.17588	7.40819
										5.1792	7.4356
										5.18252	7.47563
										5.18584	7.52128
										5.18916	7.5905
										5.19248	7.71492
										5.1958	7.90515
										5.19912	8.12341
										5.20244	8.2971
										5.20576	8.36954
										5.20908	8.3492
										5.2124	8.29757
										5.21572	8.26885
										5.21904	8.27993
										5.22236	8.31613
										5.22568	8.34122
										5.229	8.30331
										5.23232	8.15291
										5.23564	7.87907
										5.23896	7.54566
										5.24228	7.27964
										5.2456	7.18649
										5.24892	7.28566
										5.25224	7.52226
										5.25556	7.80713
										5.25888	8.06339
										5.2622	8.27609
										5.26552	8.49628
										5.26884	8.78132
										5.27216	9.13141
										5.27548	9.49178
										5.2788	9.81194
										5.28212	10.0788
										5.28544	10.3072
										5.28876	10.5213
										5.29208	10.7333
										5.2954	10.92
										5.29872	11.0386
										5.30204	11.0698
										5.30536	11.0331
										5.30868	10.9593
										5.312	10.859
										5.31532	10.7209
										5.31864	10.5365
										5.32196	10.3142
										5.32528	10.0615
										5.3286	9.7627
										5.33192	9.41233
										5.33524	9.08559
										5.33856	8.90642
										5.34188	8.92385
										5.3452	9.05629
										5.34852	9.15859
										5.35184	9.15112
										5.35516	9.07233
										5.35848	8.99246
										5.3618	8.92278
										5.36512	8.80364
										5.36844	8.55962
										5.37176	8.19721
										5.37508	7.83598
										5.3784	7.62411
										5.38172	7.64944
										5.38504	7.89913
										5.38836	8.2427
										5.39168	8.47401
										5.395	8.43233
										5.39832	8.10386
										5.40164	7.60413
										5.40496	7.11489
										5.40828	6.8448
										5.4116	6.93961
										5.41492	7.36273
										5.41824	7.94544
										5.42156	8.56382
										5.42488	9.20152
										5.4282	9.86489
										5.43152	10.4838
										5.43484	10.9343
										5.43816	11.1449
										5.44148	11.1436
										5.4448	11.0208
										5.44812	10.868
										5.45144	10.7301
										5.45476	10.5858
										5.45808	10.3596
										5.4614	9.97195
										5.46472	9.41594
										5.46804	8.78504
										5.47136	8.21243
										5.47468	7.78245
										5.478	7.5036
										5.48132	7.34146
										5.48464	7.26456
										5.48796	7.26529
										5.49128	7.32964
										5.4946	7.41262
										5.49792	7.47095
										5.50124	7.4987
										5.50456	7.5078
										5.50788	7.48342
										5.5112	7.39503
										5.51452	7.24643
										5.51784	7.07261
										5.52116	6.88889
										5.52448	6.68833
										5.5278	6.48335
										5.53112	6.31423
										5.53444	6.20718
										5.53776	6.14849
										5.54108	6.11059
										5.5444	6.08535
										5.54772	6.07942
										5.55104	6.0991
										5.55436	6.14129
										5.55768	6.19113
										5.561	6.23742
										5.56432	6.29354
										5.56764	6.39064
										5.57096	6.55135
										5.57428	6.77386
										5.5776	7.04961
										5.58092	7.38177
										5.58424	7.76829
										5.58756	8.1689
										5.59088	8.49975
										5.5942	8.6788
										5.59752	8.67022
										5.60084	8.47215
										5.60416	8.11434
										5.60748	7.67471
										5.6108	7.24948
										5.61412	6.91577
										5.61744	6.72899
										5.62076	6.74061
										5.62408	6.99838
										5.6274	7.50699
										5.63072	8.17787
										5.63404	8.84261
										5.63736	9.34937
										5.64068	9.66403
										5.644	9.87609
										5.64732	10.0981
										5.65064	10.3712
										5.65396	10.6525
										5.65728	10.8532
										5.6606	10.8911
										5.66392	10.7533
										5.66724	10.5101
										5.67056	10.2615
										5.67388	10.0635
										5.6772	9.89005
										5.68052	9.64438
										5.68384	9.22893
										5.68716	8.65547
										5.69048	8.08769
										5.6938	7.73456
										5.69712	7.6927
										5.70044	7.89576
										5.70376	8.19705
										5.70708	8.49425
										5.7104	8.77132
										5.71372	9.02994
										5.71704	9.21979
										5.72036	9.25004
										5.72368	9.05422
										5.727	8.67121
										5.73032	8.26001
										5.73364	7.97611
										5.73696	7.86682
										5.74028	7.90522
										5.7436	8.03098
										5.74692	8.12456
										5.75024	8.02192
										5.75356	7.63559
										5.75688	7.05106
										5.7602	6.47532
										5.76352	6.11426
										5.76684	6.08055
										5.77016	6.35478
										5.77348	6.793
										5.7768	7.19407
										5.78012	7.41901
										5.78344	7.45631
										5.78676	7.37978
										5.79008	7.29702
										5.7934	7.3321
										5.79672	7.5826
										5.80004	8.05897
										5.80336	8.66963
										5.80668	9.24107
										5.81	9.54173
										5.81332	9.3851
										5.81664	8.77081
										5.81996	7.88049
										5.82328	6.93501
										5.8266	6.10199
										5.82992	5.50077
										5.83324	5.18411
										5.83656	5.10104
										5.83988	5.1474
										5.8432	5.24146
										5.84652	5.33283
										5.84984	5.38132
										5.85316	5.35808
										5.85648	5.26141
										5.8598	5.11737
										5.86312	4.96177
										5.86644	4.82338
										5.86976	4.70977
										5.87308	4.61833
										5.8764	4.55961
										5.87972	4.54432
										5.88304	4.55803
										5.88636	4.57719
										5.88968	4.59845
										5.893	4.64246
										5.89632	4.73579
										5.89964	4.89389
										5.90296	5.11744
										5.90628	5.39751
										5.9096	5.7212
										5.91292	6.08079
										5.91624	6.48444
										5.91956	6.94834
										5.92288	7.46577
										5.9262	7.99132
										5.92952	8.47038
										5.93284	8.87981
										5.93616	9.21999
										5.93948	9.48723
										5.9428	9.68383
										5.94612	9.85669
										5.94944	10.0957
										5.95276	10.4677
										5.95608	10.9594
										5.9594	11.4716
										5.96272	11.8605
										5.96604	12.0159
										5.96936	11.9133
										5.97268	11.6034
										5.976	11.1731
										5.97932	10.713
										5.98264	10.3165
										5.98596	10.0651
										5.98928	9.9923
										5.9926	10.0855
										5.99592	10.3047
										5.99924	10.5855
										6.00256	10.855
										6.00588	11.063
										6.0092	11.2011
										6.01252	11.2794
										6.01584	11.2844
										6.01916	11.1806
										6.02248	10.9407
										6.0258	10.5633
										6.02912	10.0848
										6.03244	9.57171
										6.03576	9.08838
										6.03908	8.681
										6.0424	8.37519
										6.04572	8.17526
										6.04904	8.05459
										6.05236	7.93603
										6.05568	7.7199
										6.059	7.35162
										6.06232	6.84828
										6.06564	6.29092
										6.06896	5.81147
										6.07228	5.5529
										6.0756	5.61141
										6.07892	5.99207
										6.08224	6.61566
										6.08556	7.37146
										6.08888	8.15609
										6.0922	8.8817
										6.09552	9.49572
										6.09884	9.99601
										6.10216	10.3958
										6.10548	10.679
										6.1088	10.8135
										6.11212	10.7916
										6.11544	10.6343
										6.11876	10.3766
										6.12208	10.0636
										6.1254	9.75426
										6.12872	9.51513
										6.13204	9.3751
										6.13536	9.28945
										6.13868	9.16392
										6.142	8.92152
										6.14532	8.56194
										6.14864	8.14802
										6.15196	7.75261
										6.15528	7.44628
										6.1586	7.28218
										6.16192	7.2526
										6.16524	7.2866
										6.16856	7.28527
										6.17188	7.15605
										6.1752	6.85124
										6.17852	6.3977
										6.18184	5.90064
										6.18516	5.51193
										6.18848	5.3542
										6.1918	5.45487
										6.19512	5.72342
										6.19844	5.96997
										6.20176	5.98829
										6.20508	5.66263
										6.2084	5.02853
										6.21172	4.28001
										6.21504	3.6686
										6.21836	3.34281
										6.22168	3.31787
										6.225	3.56205
										6.22832	4.03818
										6.23164	4.66794
										6.23496	5.34045
										6.23828	5.96381
										6.2416	6.47981
										6.24492	6.85223
										6.24824	7.06526
										6.25156	7.1291
										6.25488	7.07942
										6.2582	6.97443
										6.26152	6.8873
										6.26484	6.88051
										6.26816	6.97587
										6.27148	7.14934
										6.2748	7.3581
										6.27812	7.58391
										6.28144	7.8503
										6.28476	8.18226
										6.28808	8.55939
										6.2914	8.91561
										6.29472	9.18123
										6.29804	9.32192
										6.30136	9.34697
										6.30468	9.29367
										6.308	9.21975
										6.31132	9.19182
										6.31464	9.25664
										6.31796	9.42814
										6.32128	9.68921
										6.3246	9.97558
										6.32792	10.1846
										6.33124	10.2337
										6.33456	10.1198
										6.33788	9.91797
										6.3412	9.72657
										6.34452	9.62383
										6.34784	9.64245
										6.35116	9.74838
										6.35448	9.85242
										6.3578	9.87408
										6.36112	9.80162
										6.36444	9.6851
										6.36776	9.58446
										6.37108	9.54201
										6.3744	9.5795
										6.37772	9.68724
										6.38104	9.82424
										6.38436	9.95126
										6.38768	10.0708
										6.391	10.2303
										6.39432	10.471
										6.39764	10.786
										6.40096	11.1327
										6.40428	11.4611
										6.4076	11.7144
										6.41092	11.8088
										6.41424	11.657
										6.41756	11.2301
										6.42088	10.5911
										6.4242	9.8663
										6.42752	9.18174
										6.43084	8.61397
										6.43416	8.196
										6.43748	7.94074
										6.4408	7.82813
										6.44412	7.79749
										6.44744	7.78168
										6.45076	7.74511
										6.45408	7.68168
										6.4574	7.59566
										6.46072	7.49513
										6.46404	7.40129
										6.46736	7.33817
										6.47068	7.30473
										6.474	7.27986
										6.47732	7.25877
										6.48064	7.27846
										6.48396	7.40565
										6.48728	7.68855
										6.4906	8.11112
										6.49392	8.59599
										6.49724	9.04773
										6.50056	9.38911
										6.50388	9.57951
										6.5072	9.61992
										6.51052	9.5393
										6.51384	9.36664
										6.51716	9.11047
										6.52048	8.763
										6.5238	8.32026
										6.52712	7.80905
										6.53044	7.28488
										6.53376	6.81236
										6.53708	6.44313
										6.5404	6.21395
										6.54372	6.1199
										6.54704	6.10206
										6.55036	6.0785
										6.55368	5.99605
										6.557	5.84501
										6.56032	5.65685
										6.56364	5.49481
										6.56696	5.43291
										6.57028	5.52541
										6.5736	5.77179
										6.57692	6.09191
										6.58024	6.35514
										6.58356	6.46208
										6.58688	6.39734
										6.5902	6.20424
										6.59352	5.94909
										6.59684	5.71845
										6.60016	5.6028
										6.60348	5.64314
										6.6068	5.7949
										6.61012	5.95893
										6.61344	6.05203
										6.61676	6.05559
										6.62008	6.00631
[truncated: 1,537 more rows]
