# Supplementary material for: Mechanical instability and interfacial energy drive biofilm morphogenesis
Source: eLife. 2019 Mar 8;8:e43920. doi: 10.7554/eLife.43920 (PMC6453567; doi:10.7554/eLife.43920)
Supplement: Figure 3—figure supplement 1—source data 1. [file elife-43920-fig3-figsupp1-data1.xlsx]

## Sheet: Figure 3 - figure supplement 1
		Figure 3 - figure supplement 1
Description		Line profile data extracted using confocol optical profiling. Data are represented as (x, z).
Condition
Computed/Measured quantity		before peeling		after peeling
		x (mm)	z (μm)	x (mm)	z (μm)
		0	-5.63533	0	1.29388
		0.00122051	-5.51196	0.00119823	1.28666
		0.00244103	-5.38209	0.00239646	1.27803
		0.00366154	-5.23908	0.00359469	1.27358
		0.00488206	-5.09206	0.00479292	1.26849
		0.00610257	-4.93758	0.00599116	1.26299
		0.00732309	-4.79261	0.00718939	1.25827
		0.0085436	-4.6769	0.00838762	1.2531
		0.00976412	-4.56859	0.00958585	1.24591
		0.0109846	-4.5159	0.0107841	1.23582
		0.0122051	-4.50201	0.0119823	1.2231
		0.0134257	-4.4931	0.0131805	1.2098
		0.0146462	-4.54635	0.0143788	1.19877
		0.0158667	-4.60976	0.015577	1.19323
		0.0170872	-4.6691	0.0167752	1.19268
		0.0183077	-4.753	0.0179735	1.19545
		0.0195282	-4.81732	0.0191717	1.20084
		0.0207488	-4.8793	0.0203699	1.20843
		0.0219693	-4.94591	0.0215682	1.21609
		0.0231898	-4.99733	0.0227664	1.2209
		0.0244103	-5.06367	0.0239646	1.22211
		0.0256308	-5.12974	0.0251629	1.21622
		0.0268513	-5.18083	0.0263611	1.20699
		0.0280718	-5.24632	0.0275593	1.19564
		0.0292924	-5.27225	0.0287576	1.18728
		0.0305129	-5.26809	0.0299558	1.1821
		0.0317334	-5.23248	0.031154	1.18003
		0.0329539	-5.1495	0.0323522	1.17814
		0.0341744	-5.04061	0.0335505	1.17354
		0.0353949	-4.90218	0.0347487	1.16694
		0.0366154	-4.7506	0.0359469	1.15742
		0.037836	-4.58346	0.0371452	1.15065
		0.0390565	-4.40004	0.0383434	1.14443
		0.040277	-4.19648	0.0395416	1.14087
		0.0414975	-3.97373	0.0407399	1.14052
		0.042718	-3.79423	0.0419381	1.13845
		0.0439385	-3.63016	0.0431363	1.13744
		0.045159	-3.524	0.0443346	1.13568
		0.0463796	-3.46237	0.0455328	1.1332
		0.0476001	-3.39168	0.046731	1.13255
		0.0488206	-3.2929	0.0479293	1.13027
		0.0500411	-3.12725	0.0491275	1.13045
		0.0512616	-2.89884	0.0503257	1.13271
		0.0524821	-2.57348	0.0515239	1.13547
		0.0537027	-2.239	0.0527222	1.14194
		0.0549232	-1.92178	0.0539204	1.14705
		0.0561437	-1.67508	0.0551186	1.14761
		0.0573642	-1.47572	0.0563169	1.14545
		0.0585847	-1.30797	0.0575151	1.14103
		0.0598052	-1.16058	0.0587133	1.13854
		0.0610257	-1.02822	0.0599116	1.14078
		0.0622463	-0.889883	0.0611098	1.15122
		0.0634668	-0.761032	0.062308	1.16484
		0.0646873	-0.640757	0.0635063	1.18258
		0.0659078	-0.515688	0.0647045	1.19638
		0.0671283	-0.41364	0.0659027	1.20838
		0.0683488	-0.316387	0.067101	1.2157
		0.0695693	-0.226459	0.0682992	1.21944
		0.0707899	-0.143891	0.0694974	1.22108
		0.0720104	-0.05526	0.0706956	1.21797
		0.0732309	0.027765	0.0718939	1.21233
		0.0744514	0.098401	0.0730921	1.20495
		0.0756719	0.161032	0.0742903	1.19364
		0.0768924	0.191966	0.0754886	1.18395
		0.0781129	0.211895	0.0766868	1.17368
		0.0793335	0.213826	0.077885	1.16307
		0.080554	0.205291	0.0790833	1.14677
		0.0817745	0.195441	0.0802815	1.12987
		0.082995	0.174707	0.0814797	1.10727
		0.0842155	0.1577	0.082678	1.0843
		0.085436	0.136933	0.0838762	1.06263
		0.0866566	0.099209	0.0850744	1.04405
		0.0878771	0.053971	0.0862727	1.03365
		0.0890976	-0.00389	0.0874709	1.02787
		0.0903181	-0.066107	0.0886691	1.03147
		0.0915386	-0.114398	0.0898673	1.03895
		0.0927591	-0.135614	0.0910656	1.05214
		0.0939796	-0.113164	0.0922638	1.06694
		0.0952002	-0.066981	0.093462	1.0816
		0.0964207	0.02995	0.0946603	1.0947
		0.0976412	0.150387	0.0958585	1.10318
		0.0988617	0.287511	0.0970567	1.10804
		0.100082	0.45133	0.098255	1.10849
		0.101303	0.608597	0.0994532	1.10683
		0.102523	0.757796	0.100651	1.10485
		0.103744	0.881427	0.10185	1.10393
		0.104964	0.973538	0.103048	1.10554
		0.106185	1.03229	0.104246	1.11072
		0.107405	1.05081	0.105444	1.12039
		0.108626	1.0443	0.106643	1.13309
		0.109846	0.999527	0.107841	1.14663
		0.111067	0.935682	0.109039	1.15735
		0.112287	0.873184	0.110237	1.16228
		0.113508	0.818527	0.111436	1.16326
		0.114728	0.803832	0.112634	1.15787
		0.115949	0.818295	0.113832	1.15085
		0.117169	0.87168	0.11503	1.14484
		0.11839	0.930712	0.116228	1.13946
		0.11961	0.993031	0.117427	1.13837
		0.120831	1.01785	0.118625	1.13659
		0.122051	1.02833	0.119823	1.13345
		0.123272	1.02205	0.121021	1.1249
		0.124493	1.01698	0.12222	1.11275
		0.125713	1.01972	0.123418	1.09896
		0.126934	1.03489	0.124616	1.08857
		0.128154	1.0582	0.125814	1.08194
		0.129375	1.07089	0.127013	1.08291
		0.130595	1.08324	0.128211	1.08962
		0.131816	1.08798	0.129409	1.10155
		0.133036	1.09902	0.130607	1.1195
		0.134257	1.15093	0.131805	1.14117
		0.135477	1.23212	0.133004	1.16045
		0.136698	1.33796	0.134202	1.17054
		0.137918	1.48167	0.1354	1.171
		0.139139	1.61987	0.136598	1.15894
		0.140359	1.75937	0.137797	1.14305
		0.14158	1.88825	0.138995	1.13169
		0.1428	2.01402	0.140193	1.13014
		0.144021	2.15277	0.141391	1.13642
		0.145241	2.30591	0.14259	1.1516
		0.146462	2.47336	0.143788	1.16572
		0.147682	2.66758	0.144986	1.17671
		0.148903	2.86639	0.146184	1.18282
		0.150123	3.07369	0.147382	1.18677
		0.151344	3.26497	0.148581	1.18791
		0.152564	3.43948	0.149779	1.18885
		0.153785	3.5954	0.150977	1.18844
		0.155005	3.71518	0.152175	1.18426
		0.156226	3.83619	0.153374	1.17717
		0.157446	3.93363	0.154572	1.16755
		0.158667	4.03704	0.15577	1.15468
		0.159887	4.14613	0.156968	1.14451
		0.161108	4.24231	0.158167	1.1379
		0.162328	4.34621	0.159365	1.13529
		0.163549	4.44586	0.160563	1.13905
		0.164769	4.54286	0.161761	1.147
		0.16599	4.63977	0.162959	1.15902
		0.167211	4.73645	0.164158	1.17409
		0.168431	4.83161	0.165356	1.19151
		0.169652	4.9223	0.166554	1.20787
		0.170872	5.01167	0.167752	1.21958
		0.172093	5.08839	0.168951	1.22574
		0.173313	5.15992	0.170149	1.22088
		0.174534	5.22393	0.171347	1.21042
		0.175754	5.27372	0.172545	1.19345
		0.176975	5.32168	0.173744	1.17811
		0.178195	5.36194	0.174942	1.16661
		0.179416	5.40586	0.17614	1.1636
		0.180636	5.44997	0.177338	1.16426
		0.181857	5.50138	0.178536	1.16844
		0.183077	5.55355	0.179735	1.16965
		0.184298	5.60706	0.180933	1.16938
		0.185518	5.65835	0.182131	1.16591
		0.186739	5.69978	0.183329	1.15952
		0.187959	5.7369	0.184528	1.15301
		0.18918	5.76258	0.185726	1.1435
		0.1904	5.78478	0.186924	1.13359
		0.191621	5.81379	0.188122	1.12488
		0.192841	5.86152	0.189321	1.11798
		0.194062	5.91696	0.190519	1.11581
		0.195282	6.0011	0.191717	1.11568
		0.196503	6.10465	0.192915	1.11684
		0.197723	6.20882	0.194113	1.11561
		0.198944	6.33114	0.195312	1.11126
		0.200164	6.45819	0.19651	1.10461
		0.201385	6.58547	0.197708	1.09848
		0.202605	6.73183	0.198906	1.09491
		0.203826	6.88167	0.200105	1.09551
		0.205046	7.03964	0.201303	1.09642
		0.206267	7.20602	0.202501	1.0973
		0.207488	7.36369	0.203699	1.0944
		0.208708	7.51311	0.204898	1.08936
		0.209929	7.64085	0.206096	1.08506
		0.211149	7.76869	0.207294	1.08086
		0.21237	7.88908	0.208492	1.07954
		0.21359	8.01126	0.20969	1.07817
		0.214811	8.13428	0.210889	1.07767
		0.216031	8.24315	0.212087	1.07497
		0.217252	8.34006	0.213285	1.07377
		0.218472	8.42643	0.214483	1.07368
		0.219693	8.49126	0.215682	1.07563
		0.220913	8.55908	0.21688	1.07852
		0.222134	8.62843	0.218078	1.08048
		0.223354	8.75077	0.219276	1.07838
		0.224575	8.92342	0.220475	1.07277
		0.225795	9.14455	0.221673	1.06436
		0.227016	9.38947	0.222871	1.0547
		0.228236	9.608	0.224069	1.04532
		0.229457	9.75304	0.225267	1.03691
		0.230677	9.84817	0.226466	1.02638
		0.231898	9.92384	0.227664	1.01521
		0.233118	9.97279	0.228862	1.00294
		0.234339	10.0202	0.23006	0.993006
		0.235559	10.0687	0.231259	0.988591
		0.23678	10.1079	0.232457	0.986581
		0.238	10.1552	0.233655	0.986296
		0.239221	10.2074	0.234853	0.987124
		0.240441	10.2466	0.236052	0.985806
		0.241662	10.2733	0.23725	0.985019
		0.242882	10.2612	0.238448	0.98375
		0.244103	10.2533	0.239646	0.984045
		0.245323	10.4052	0.240844	0.983477
		0.246544	11.2979	0.242043	0.984519
		0.247765	12.539	0.243241	0.985622
		0.248985	13.7858	0.244439	0.987205
		0.250206	14.7554	0.245637	0.990681
		0.251426	15.0418	0.246836	0.995107
		0.252647	15.1067	0.248034	0.999811
		0.253867	15.1865	0.249232	1.00104
		0.255088	15.3054	0.25043	0.998489
		0.256308	15.4513	0.251629	0.993058
		0.257529	15.5763	0.252827	0.985258
		0.258749	15.5984	0.254025	0.979562
		0.25997	15.6374	0.255223	0.976017
		0.26119	15.7504	0.256421	0.976538
		0.262411	15.9447	0.25762	0.980136
		0.263631	16.2723	0.258818	0.985594
		0.264852	16.6046	0.260016	0.989147
		0.266072	16.8885	0.261214	0.988434
		0.267293	17.0463	0.262413	0.983529
		0.268513	17.1654	0.263611	0.977234
		0.269734	17.247	0.264809	0.970398
		0.270954	17.335	0.266007	0.968776
		0.272175	17.4336	0.267206	0.971129
		0.273395	17.5125	0.268404	0.976279
		0.274616	17.6072	0.269602	0.98269
		0.275836	17.737	0.2708	0.989143
		0.277057	17.935	0.271999	0.996467
		0.278277	18.2768	0.273197	1.00703
		0.279498	18.6461	0.274395	1.01865
		0.280718	19.0381	0.275593	1.03382
		0.281939	19.3203	0.276791	1.04865
		0.283159	19.5528	0.27799	1.06432
		0.28438	19.7016	0.279188	1.08135
		0.2856	19.8342	0.280386	1.10009
		0.286821	19.9464	0.281584	1.12079
		0.288041	20.0473	0.282783	1.14311
		0.289262	20.1303	0.283981	1.15865
		0.290483	20.188	0.285179	1.1647
		0.291703	20.2042	0.286377	1.16097
		0.292924	20.2138	0.287576	1.13964
		0.294144	20.2393	0.288774	1.10975
		0.295365	20.312	0.289972	1.07263
		0.296585	20.4365	0.29117	1.03736
		0.297806	20.6336	0.292368	1.00485
		0.299026	20.8372	0.293567	0.982432
		0.300247	21.0133	0.294765	0.964625
		0.301467	21.1053	0.295963	0.950663
		0.302688	21.1555	0.297161	0.940658
		0.303908	21.1736	0.29836	0.933748
		0.305129	21.1746	0.299558	0.932367
		0.306349	21.1725	0.300756	0.940125
		0.30757	21.1668	0.301954	0.955397
		0.30879	21.1479	0.303153	0.981181
		0.310011	21.126	0.304351	1.01285
		0.311231	21.1022	0.305549	1.05039
		0.312452	21.0801	0.306747	1.08469
		0.313672	21.0655	0.307945	1.11362
		0.314893	21.0608	0.309144	1.13131
		0.316113	21.0779	0.310342	1.14123
		0.317334	21.1057	0.31154	1.13992
		0.318554	21.1446	0.312738	1.13541
		0.319775	21.1806	0.313937	1.12897
		0.320995	21.2079	0.315135	1.12343
		0.322216	21.2194	0.316333	1.1207
		0.323436	21.2196	0.317531	1.11591
		0.324657	21.2084	0.31873	1.11428
		0.325877	21.1875	0.319928	1.1121
		0.327098	21.1563	0.321126	1.1101
		0.328318	21.1058	0.322324	1.10694
		0.329539	21.0406	0.323522	1.10141
		0.33076	20.9663	0.324721	1.09129
		0.33198	20.8912	0.325919	1.07862
		0.333201	20.8318	0.327117	1.06499
		0.334421	20.7952	0.328315	1.05188
		0.335642	20.7938	0.329514	1.04154
		0.336862	20.8019	0.330712	1.03235
		0.338083	20.827	0.33191	1.02473
		0.339303	20.8349	0.333108	1.01764
		0.340524	20.828	0.334307	1.01261
		0.341744	20.7997	0.335505	1.00217
		0.342965	20.7418	0.336703	0.989406
		0.344185	20.6685	0.337901	0.970733
		0.345406	20.5694	0.339099	0.947202
		0.346626	20.4671	0.340298	0.925365
		0.347847	20.3632	0.341496	0.907625
		0.349067	20.2623	0.342694	0.896818
		0.350288	20.1684	0.343892	0.891891
		0.351508	20.0843	0.345091	0.892355
		0.352729	20.0133	0.346289	0.893394
		0.353949	19.9524	0.347487	0.896211
		0.35517	19.8942	0.348685	0.895814
		0.35639	19.8323	0.349884	0.894068
		0.357611	19.7536	0.351082	0.884636
		0.358831	19.6522	0.35228	0.871114
		0.360052	19.5305	0.353478	0.850678
		0.361272	19.4041	0.354676	0.830916
		0.362493	19.2969	0.355875	0.812926
		0.363713	19.2193	0.357073	0.804408
		0.364934	19.1596	0.358271	0.797831
		0.366154	19.123	0.359469	0.797403
		0.367375	19.0832	0.360668	0.795078
		0.368595	19.0282	0.361866	0.79099
		0.369816	18.9523	0.363064	0.784196
		0.371036	18.8639	0.364262	0.773651
		0.372257	18.7656	0.365461	0.760057
		0.373478	18.6753	0.366659	0.744047
		0.374698	18.5873	0.367857	0.725793
		0.375919	18.506	0.369055	0.706588
		0.377139	18.438	0.370253	0.688555
		0.37836	18.3651	0.371452	0.673509
		0.37958	18.3101	0.37265	0.664722
		0.380801	18.2528	0.373848	0.661384
		0.382021	18.1959	0.375046	0.66363
		0.383242	18.1423	0.376245	0.667868
		0.384462	18.0748	0.377443	0.67234
		0.385683	17.998	0.378641	0.67794
		0.386903	17.9223	0.379839	0.685775
		0.388124	17.8493	0.381038	0.697047
		0.389344	17.7803	0.382236	0.706769
		0.390565	17.7168	0.383434	0.712467
		0.391785	17.6449	0.384632	0.706853
		0.393006	17.5576	0.38583	0.694598
		0.394226	17.4291	0.387029	0.674422
		0.395447	17.3003	0.388227	0.65695
		0.396667	17.1889	0.389425	0.643565
		0.397888	17.1343	0.390623	0.636859
		0.399108	17.1657	0.391822	0.631072
		0.400329	17.3315	0.39302	0.624943
		0.401549	17.6014	0.394218	0.617758
		0.40277	17.9079	0.395416	0.610539
		0.40399	18.2386	0.396615	0.607217
		0.405211	18.433	0.397813	0.60688
		0.406431	18.4926	0.399011	0.609751
		0.407652	18.3967	0.400209	0.608764
		0.408872	18.1912	0.401407	0.604128
		0.410093	17.9202	0.402606	0.592326
		0.411313	17.8175	0.403804	0.574288
		0.412534	17.815	0.405002	0.551464
		0.413755	18.0991	0.4062	0.524071
		0.414975	18.6672	0.407399	0.49411
		0.416196	19.4786	0.408597	0.465708
		0.417416	20.5992	0.409795	0.439164
		0.418637	21.2031	0.410993	0.419626
		0.419857	20.8441	0.412192	0.409627
		0.421078	20.597	0.41339	0.407512
		0.422298	20.3014	0.414588	0.411843
		0.423519	19.9486	0.415786	0.421565
		0.424739	19.3918	0.416984	0.428961
		0.42596	18.841	0.418183	0.431941
		0.42718	18.2113	0.419381	0.429676
		0.428401	17.6064	0.420579	0.419273
		0.429621	16.9992	0.421777	0.405057
		0.430842	16.3897	0.422976	0.387077
		0.432062	15.8367	0.424174	0.370545
		0.433283	15.3268	0.425372	0.354938
		0.434503	14.7502	0.42657	0.346379
		0.435724	14.1651	0.427769	0.340108
		0.436944	13.5885	0.428967	0.338543
		0.438165	12.9439	0.430165	0.336156
		0.439385	12.3747	0.431363	0.332107
		0.440606	11.8093	0.432561	0.323394
		0.441826	11.2853	0.43376	0.312314
		0.443047	10.7828	0.434958	0.299101
		0.444267	10.2673	0.436156	0.285889
		0.445488	9.7245	0.437354	0.27378
		0.446708	9.14555	0.438553	0.257273
		0.447929	8.45787	0.439751	0.239201
		0.449149	7.75915	0.440949	0.21852
		0.45037	7.06231	0.442147	0.198437
		0.45159	6.46384	0.443346	0.177318
		0.452811	5.88723	0.444544	0.164067
		0.454032	5.3165	0.445742	0.14765
		0.455252	4.79221	0.44694	0.132762
		0.456473	4.27304	0.448139	0.115814
		0.457693	3.66621	0.449337	0.101712
		0.458914	2.96662	0.450535	0.089785
		0.460134	2.22587	0.451733	0.087539
		0.461355	1.3618	0.452931	0.092249
		0.462575	0.554403	0.45413	0.098755
		0.463796	-0.207778	0.455328	0.102075
		0.465016	-0.887347	0.456526	0.095518
		0.466237	-1.48548	0.457724	0.079997
		0.467457	-2.0498	0.458923	0.056581
		0.468678	-2.67539	0.460121	0.030272
		0.469898	-3.33588	0.461319	0.004957
		0.471119	-4.03216	0.462517	-0.019648
		0.472339	-4.83171	0.463716	-0.039156
		0.47356	-5.66838	0.464914	-0.056899
		0.47478	-6.51409	0.466112	-0.072362
		0.476001	-7.29407	0.46731	-0.087368
		0.477221	-8.11344	0.468508	-0.10308
		0.478442	-8.87486	0.469707	-0.12125
		0.479662	-9.67393	0.470905	-0.14248
		0.480883	-10.5145	0.472103	-0.164537
		0.482103	-11.4527	0.473301	-0.186495
		0.483324	-12.4545	0.4745	-0.201233
		0.484544	-13.4314	0.475698	-0.212067
		0.485765	-14.5604	0.476896	-0.218793
		0.486985	-15.5871	0.478094	-0.227665
		0.488206	-16.5172	0.479293	-0.241599
		0.489426	-17.4311	0.480491	-0.262732
		0.490647	-18.3737	0.481689	-0.284795
		0.491867	-19.2471	0.482887	-0.305255
		0.493088	-20.0263	0.484085	-0.317804
		0.494308	-20.714	0.485284	-0.326715
		0.495529	-21.1386	0.486482	-0.329274
		0.49675	-21.7172	0.48768	-0.332349
		0.49797	-22.3953	0.488878	-0.336283
		0.499191	-23.3574	0.490077	-0.343668
		0.500411	-24.5121	0.491275	-0.355135
		0.501632	-25.7076	0.492473	-0.366549
		0.502852	-26.8851	0.493671	-0.375069
		0.504073	-27.9289	0.49487	-0.378963
		0.505293	-28.9428	0.496068	-0.379668
		0.506514	-29.7811	0.497266	-0.379384
		0.507734	-30.5371	0.498464	-0.381987
		0.508955	-31.246	0.499662	-0.390897
		0.510175	-31.8675	0.500861	-0.406245
		0.511396	-32.4766	0.502059	-0.428424
		0.512616	-33.0493	0.503257	-0.456383
		0.513837	-33.5793	0.504455	-0.486769
		0.515057	-34.0565	0.505654	-0.515471
		0.516278	-34.5262	0.506852	-0.540897
		0.517498	-35.3114	0.50805	-0.561788
		0.518719	-36.3403	0.509248	-0.577042
		0.519939	-37.7051	0.510447	-0.591083
		0.52116	-38.9357	0.511645	-0.605183
		0.52238	-40.1408	0.512843	-0.620006
		0.523601	-40.9431	0.514041	-0.63564
		0.524821	-41.5903	0.515239	-0.652862
		0.526042	-42.1028	0.516438	-0.667322
		0.527262	-42.5411	0.517636	-0.680888
		0.528483	-43.009	0.518834	-0.694316
		0.529703	-43.5471	0.520032	-0.713426
		0.530924	-44.1093	0.521231	-0.734806
		0.532144	-44.7566	0.522429	-0.760859
		0.533365	-45.5437	0.523627	-0.785217
		0.534585	-46.465	0.524825	-0.806522
		0.535806	-47.42	0.526024	-0.822924
		0.537027	-48.1365	0.527222	-0.839984
		0.538247	-48.7782	0.52842	-0.856568
		0.539468	-49.1951	0.529618	-0.874981
		0.540688	-49.5757	0.530816	-0.894522
		0.541909	-50.0822	0.532015	-0.913682
		0.543129	-50.639	0.533213	-0.932209
		0.54435	-51.3341	0.534411	-0.949831
		0.54557	-52.0401	0.535609	-0.968332
		0.546791	-52.6745	0.536808	-0.988771
		0.548011	-53.2749	0.538006	-1.01093
		0.549232	-53.7448	0.539204	-1.03531
		0.550452	-54.0193	0.540402	-1.06064
		0.551673	-54.2461	0.541601	-1.08679
		0.552893	-54.5457	0.542799	-1.1132
		0.554114	-54.9588	0.543997	-1.13751
		0.555334	-55.4255	0.545195	-1.16031
		0.556555	-55.8203	0.546393	-1.181
		0.557775	-56.1692	0.547592	-1.20216
		0.558996	-56.4902	0.54879	-1.22578
		0.560216	-56.8293	0.549988	-1.25303
		0.561437	-57.173	0.551186	-1.2816
		0.562657	-57.4417	0.552385	-1.30994
		0.563878	-57.5874	0.553583	-1.33468
		0.565098	-57.7235	0.554781	-1.35623
		0.566319	-57.8591	0.555979	-1.37505
		0.567539	-58.0182	0.557178	-1.39425
		0.56876	-58.1921	0.558376	-1.41505
		0.56998	-58.3847	0.559574	-1.43828
		0.571201	-58.608	0.560772	-1.46615
		0.572421	-58.8223	0.56197	-1.49312
		0.573642	-59.039	0.563169	-1.52043
		0.574862	-59.2487	0.564367	-1.5463
		0.576083	-59.4626	0.565565	-1.57107
		0.577303	-59.6782	0.566763	-1.59673
		0.578524	-59.9166	0.567962	-1.62526
		0.579745	-60.1673	0.56916	-1.65526
		0.580965	-60.4099	0.570358	-1.68629
		0.582186	-60.6745	0.571556	-1.71645
		0.583406	-60.9282	0.572755	-1.74249
		0.584627	-61.1803	0.573953	-1.7652
		0.585847	-61.4626	0.575151	-1.7851
		0.587068	-61.7599	0.576349	-1.80342
		0.588288	-62.0742	0.577547	-1.823
		0.589509	-62.3591	0.578746	-1.84549
		0.590729	-62.6273	0.579944	-1.8716
		0.59195	-62.9067	0.581142	-1.90131
		0.59317	-63.1932	0.58234	-1.93388
		0.594391	-63.5005	0.583539	-1.97007
		0.595611	-63.821	0.584737	-2.00838
		0.596832	-64.1163	0.585935	-2.04782
		0.598052	-64.4118	0.587133	-2.08727
		0.599273	-64.6849	0.588332	-2.12745
		0.600493	-64.9271	0.58953	-2.1675
		0.601714	-65.1507	0.590728	-2.20882
		0.602934	-65.377	0.591926	-2.25013
		0.604155	-65.5926	0.593124	-2.29003
		0.605375	-65.8085	0.594323	-2.32714
		0.606596	-66.0494	0.595521	-2.36039
		0.607816	-66.2304	0.596719	-2.38785
		0.609037	-66.4244	0.597917	-2.41102
		0.610257	-66.5903	0.599116	-2.43156
		0.611478	-66.6924	0.600314	-2.45067
		0.612698	-66.7886	0.601512	-2.46959
		0.613919	-66.8921	0.60271	-2.49118
		0.615139	-66.9595	0.603909	-2.51356
		0.61636	-66.9905	0.605107	-2.53825
		0.61758	-67.0195	0.606305	-2.56782
		0.618801	-66.8314	0.607503	-2.59952
		0.620022	-66.456	0.608701	-2.63419
		0.621242	-65.8935	0.6099	-2.66846
		0.622463	-65.411	0.611098	-2.69965
		0.623683	-65.0731	0.612296	-2.7281
		0.624904	-64.9282	0.613494	-2.75728
		0.626124	-65.1799	0.614693	-2.78656
		0.627345	-65.5188	0.615891	-2.82093
		0.628565	-65.8932	0.617089	-2.86022
		0.629786	-66.1635	0.618287	-2.90064
		0.631006	-66.399	0.619486	-2.93801
		0.632227	-66.5058	0.620684	-2.97245
		0.633447	-66.5933	0.621882	-3.003
		0.634668	-66.6507	0.62308	-3.03529
		0.635888	-66.6754	0.624278	-3.06955
		0.637109	-66.7142	0.625477	-3.1099
		0.638329	-66.7506	0.626675	-3.14832
		0.63955	-66.7925	0.627873	-3.1837
		0.64077	-66.8299	0.629071	-3.21306
		0.641991	-66.8484	0.63027	-3.23956
		0.643211	-66.8586	0.631468	-3.26422
		0.644432	-66.869	0.632666	-3.29233
		0.645652	-66.891	0.633864	-3.32442
		0.646873	-66.944	0.635063	-3.35849
		0.648093	-67.0101	0.636261	-3.39811
		0.649314	-67.0932	0.637459	-3.43722
		0.650534	-67.1628	0.638657	-3.47754
		0.651755	-67.2142	0.639856	-3.51726
		0.652975	-67.2223	0.641054	-3.55509
		0.654196	-67.197	0.642252	-3.59168
		0.655416	-67.1479	0.64345	-3.62745
		0.656637	-67.0948	0.644648	-3.66288
		0.657857	-67.0425	0.645847	-3.69883
		0.659078	-67.0236	0.647045	-3.73784
		0.660299	-67.0442	0.648243	-3.77632
		0.661519	-67.0777	0.649441	-3.81754
		0.66274	-67.1418	0.65064	-3.85625
		0.66396	-67.2107	0.651838	-3.89075
		0.665181	-67.2862	0.653036	-3.92045
		0.666401	-67.3719	0.654234	-3.94346
		0.667622	-67.4618	0.655433	-3.96444
		0.668842	-67.5493	0.656631	-3.98573
		0.670063	-67.615	0.657829	-4.00799
		0.671283	-67.6645	0.659027	-4.0321
		0.672504	-67.6846	0.660225	-4.05844
		0.673724	-67.6582	0.661424	-4.0819
		0.674945	-67.6332	0.662622	-4.10245
		0.676165	-67.5958	0.66382	-4.12189
		0.677386	-67.5809	0.665018	-4.13863
		0.678606	-67.5963	0.666217	-4.15954
		0.679827	-67.6394	0.667415	-4.1851
		0.681047	-67.7183	0.668613	-4.216
		0.682268	-67.8142	0.669811	-4.25076
		0.683488	-67.9453	0.67101	-4.28617
		0.684709	-68.1051	0.672208	-4.31668
		0.685929	-68.2835	0.673406	-4.34115
		0.68715	-68.1768	0.674604	-4.35998
		0.68837	-67.8148	0.675802	-4.37289
		0.689591	-67.5087	0.677001	-4.38833
		0.690811	-67.1615	0.678199	-4.40457
		0.692032	-66.7993	0.679397	-4.42509
		0.693252	-66.2976	0.680595	-4.44679
		0.694473	-65.8073	0.681794	-4.4687
		0.695693	-65.2733	0.682992	-4.48741
		0.696914	-64.6073	0.68419	-4.50292
		0.698134	-64.0519	0.685388	-4.5147
		0.699355	-63.5055	0.686587	-4.52471
		0.700575	-62.982	0.687785	-4.53208
		0.701796	-62.4025	0.688983	-4.5387
		0.703017	-61.7527	0.690181	-4.54724
		0.704237	-60.8495	0.691379	-4.55786
		0.705458	-59.9652	0.692578	-4.57216
		0.706678	-59.1256	0.693776	-4.58913
		0.707899	-58.3563	0.694974	-4.60766
		0.709119	-57.5919	0.696172	-4.62345
		0.71034	-56.6969	0.697371	-4.63606
		0.71156	-55.572	0.698569	-4.64172
		0.712781	-54.2582	0.699767	-4.6452
		0.714001	-52.7958	0.700965	-4.64452
		0.715222	-51.0307	0.702164	-4.6455
		0.716442	-49.357	0.703362	-4.6472
		0.717663	-47.7311	0.70456	-4.65279
		0.718883	-46.0108	0.705758	-4.65541
		0.720104	-44.1623	0.706956	-4.65824
		0.721324	-42.7223	0.708155	-4.65806
		0.722545	-41.3923	0.709353	-4.65447
		0.723765	-40.3738	0.710551	-4.64766
		0.724986	-39.4067	0.711749	-4.64356
		0.726206	-38.5213	0.712948	-4.63911
		0.727427	-37.6713	0.714146	-4.63621
		0.728647	-36.866	0.715344	-4.6341
		0.729868	-36.0643	0.716542	-4.62168
		0.731088	-35.2081	0.717741	-4.60754
		0.732309	-34.3958	0.718939	-4.58544
		0.733529	-33.6099	0.720137	-4.56444
		0.73475	-32.8339	0.721335	-4.54659
		0.73597	-32.0662	0.722533	-4.5374
		0.737191	-31.2176	0.723732	-4.5292
		0.738411	-30.4128	0.72493	-4.52359
		0.739632	-29.5123	0.726128	-4.51613
		0.740852	-28.3099	0.727326	-4.50521
		0.742073	-26.8349	0.728525	-4.49113
		0.743294	-25.2528	0.729723	-4.47417
		0.744514	-23.6373	0.730921	-4.45408
		0.745735	-22.2413	0.732119	-4.43314
		0.746955	-21.058	0.733318	-4.4134
		0.748176	-20.3118	0.734516	-4.39468
		0.749396	-19.4361	0.735714	-4.37692
		0.750617	-18.4792	0.736912	-4.35788
		0.751837	-17.5615	0.73811	-4.33397
		0.753058	-16.4971	0.739309	-4.30328
		0.754278	-15.2792	0.740507	-4.26932
		0.755499	-14.2089	0.741705	-4.23493
		0.756719	-13.1233	0.742903	-4.20909
		0.75794	-11.9978	0.744102	-4.19036
		0.75916	-10.9636	0.7453	-4.17807
		0.760381	-9.94783	0.746498	-4.15924
		0.761601	-8.85247	0.747696	-4.13767
		0.762822	-7.67436	0.748895	-4.10649
		0.764042	-6.45991	0.750093	-4.07138
		0.765263	-5.35915	0.751291	-4.03407
		0.766483	-4.27675	0.752489	-3.99543
		0.767704	-3.07044	0.753687	-3.95301
		0.768924	-1.92031	0.754886	-3.90852
		0.770145	-0.690669	0.756084	-3.86709
		0.771365	0.59343	0.757282	-3.82296
		0.772586	1.51116	0.75848	-3.78915
		0.773806	2.45798	0.759679	-3.75432
		0.775027	3.65609	0.760877	-3.71979
		0.776247	4.73748	0.762075	-3.67695
		0.777468	5.80106	0.763273	-3.63652
		0.778688	7.04806	0.764472	-3.59022
		0.779909	8.11979	0.76567	-3.55256
		0.781129	9.1738	0.766868	-3.52321
		0.78235	10.4353	0.768066	-3.49817
		0.78357	11.6052	0.769264	-3.47132
		0.784791	12.764	0.770463	-3.43538
		0.786012	13.9763	0.771661	-3.39
		0.787232	15.2118	0.772859	-3.33461
		0.788453	16.4693	0.774057	-3.27812
		0.789673	17.714	0.775256	-3.22413
		0.790894	18.8383	0.776454	-3.18028
		0.792114	19.8697	0.777652	-3.14473
		0.793335	20.8645	0.77885	-3.11667
		0.794555	21.8531	0.780049	-3.08785
		0.795776	22.9472	0.781247	-3.05751
		0.796996	23.9628	0.782445	-3.02138
		0.798217	25.0101	0.783643	-2.98032
		0.799437	26.1554	0.784841	-2.93642
		0.800658	27.1879	0.78604	-2.89653
		0.801878	28.1218	0.787238	-2.85322
		0.803099	28.7937	0.788436	-2.8131
		0.804319	29.4662	0.789634	-2.76969
		0.80554	30.0674	0.790833	-2.72237
		0.80676	30.7163	0.792031	-2.67
		0.807981	31.4001	0.793229	-2.62277
		0.809201	32.134	0.794427	-2.5817
		0.810422	33.1102	0.795626	-2.55122
		0.811642	34.2802	0.796824	-2.5308
		0.812863	35.8648	0.798022	-2.51281
		0.814083	37.6193	0.79922	-2.49376
		0.815304	39.5742	0.800418	-2.47012
		0.816524	41.5374	0.801617	-2.44843
		0.817745	43.4321	0.802815	-2.42777
		0.818965	45.0313	0.804013	-2.4146
		0.820186	46.5822	0.805211	-2.40108
		0.821406	48.0769	0.80641	-2.38551
		0.822627	49.3518	0.807608	-2.36323
		0.823847	50.5855	0.808806	-2.33014
		0.825068	51.7839	0.810004	-2.2903
		0.826289	52.8515	0.811203	-2.24724
		0.827509	54.0818	0.812401	-2.20599
		0.82873	55.3702	0.813599	-2.16836
		0.82995	56.8308	0.814797	-2.14
		0.831171	58.324	0.815996	-2.11847
		0.832391	59.88	0.817194	-2.10464
		0.833612	61.3748	0.818392	-2.09675
		0.834832	62.8295	0.81959	-2.08963
		0.836053	64.243	0.820788	-2.07551
		0.837273	65.5975	0.821987	-2.05099
		0.838494	66.8863	0.823185	-2.01636
		0.839714	68.0947	0.824383	-1.97372
		0.840935	69.2017	0.825581	-1.93138
		0.842155	70.2377	0.82678	-1.89535
		0.843376	71.0585	0.827978	-1.86703
		0.844596	71.9887	0.829176	-1.84653
		0.845817	73.0368	0.830374	-1.83252
		0.847037	74.298	0.831573	-1.82092
		0.848258	75.5796	0.832771	-1.80525
		0.849478	76.7258	0.833969	-1.78977
		0.850699	77.744	0.835167	-1.7668
		0.851919	78.6507	0.836365	-1.7363
		0.85314	79.4785	0.837564	-1.70131
		0.85436	80.3083	0.838762	-1.65706
		0.855581	81.1145	0.83996	-1.61969
		0.856801	81.8877	0.841158	-1.5899
		0.858022	82.7188	0.842357	-1.57379
		0.859242	83.5964	0.843555	-1.56913
		0.860463	84.5123	0.844753	-1.57297
		0.861683	85.3019	0.845951	-1.57852
		0.862904	86.1604	0.84715	-1.5803
		0.864124	87.1781	0.848348	-1.57761
		0.865345	88.1916	0.849546	-1.56836
		0.866566	89.2565	0.850744	-1.55397
		0.867786	90.4388	0.851942	-1.52735
		0.869007	91.5854	0.853141	-1.49405
		0.870227	92.6566	0.854339	-1.45333
		0.871448	93.4443	0.855537	-1.41369
		0.872668	94.2509	0.856735	-1.38599
		0.873889	95.0656	0.857934	-1.3781
		0.875109	95.878	0.859132	-1.38453
		0.87633	96.6587	0.86033	-1.4024
		0.87755	97.4402	0.861528	-1.41698
		0.878771	98.1696	0.862727	-1.4248
		0.879991	98.809	0.863925	-1.42507
		0.881212	99.3143	0.865123	-1.42281
		0.882432	99.912	0.866321	-1.41945
		0.883653	100.511	0.867519	-1.41155
		0.884873	100.979	0.868718	-1.39491
		0.886094	101.414	0.869916	-1.3599
		0.887314	101.927	0.871114	-1.31577
		0.888535	102.492	0.872312	-1.26322
		0.889755	102.746	0.873511	-1.21551
		0.890976	102.124	0.874709	-1.18023
		0.892196	101.59	0.875907	-1.16446
		0.893417	101.094	0.877105	-1.16301
		0.894637	100.679	0.878304	-1.17602
		0.895858	100.348	0.879502	-1.19174
		0.897078	100.098	0.8807	-1.19989
		0.898299	99.9774	0.881898	-1.19714
		0.899519	99.9591	0.883096	-1.18664
		0.90074	100.019	0.884295	-1.16779
		0.90196	100.183	0.885493	-1.15373
		0.903181	100.302	0.886691	-1.14271
		0.904401	100.406	0.887889	-1.13787
		0.905622	100.367	0.889088	-1.13855
		0.906842	100.293	0.890286	-1.13874
		0.908063	100.184	0.891484	-1.13863
		0.909284	100.08	0.892682	-1.13396
		0.910504	100.005	0.893881	-1.12786
		0.911725	99.979	0.895079	-1.12195
		0.912945	100.01	0.896277	-1.11488
		0.914166	100.088	0.897475	-1.10708
		0.915386	100.213	0.898673	-1.09617
		0.916607	100.346	0.899872	-1.08155
		0.917827	100.463	0.90107	-1.06807
		0.919048	100.535	0.902268	-1.0562
		0.920268	100.583	0.903466	-1.04107
		0.921489	100.584	0.904665	-1.0214
		0.922709	100.57	0.905863	-0.990581
		0.92393	100.56	0.907061	-0.950604
		0.92515	100.554	0.908259	-0.910659
		0.926371	100.581	0.909458	-0.880621
		0.927591	100.622	0.910656	-0.858259
		0.928812	100.673	0.911854	-0.849862
		0.930032	100.714	0.913052	-0.848147
		0.931253	100.742	0.91425	-0.846564
		0.932473	100.733	0.915449	-0.845353
		0.933694	100.689	0.916647	-0.845918
		0.934914	100.656	0.917845	-0.847128
		0.936135	100.627	0.919043	-0.852727
		0.937355	100.623	0.920242	-0.851147
		0.938576	100.659	0.92144	-0.850386
		0.939796	100.721	0.922638	-0.845078
		0.941017	100.799	0.923836	-0.836824
		0.942237	100.902	0.925035	-0.826391
		0.943458	101.051	0.926233	-0.818668
		0.944678	101.238	0.927431	-0.810365
		0.945899	101.494	0.928629	-0.803878
		0.947119	101.812	0.929827	-0.797176
		0.94834	102.089	0.931026	-0.791343
		0.949561	101.837	0.932224	-0.788384
		0.950781	101.478	0.933422	-0.792233
		0.952002	101.104	0.93462	-0.80286
		0.953222	100.689	0.935819	-0.823342
		0.954443	100.28	0.937017	-0.843713
		0.955663	99.9274	0.938215	-0.866047
		0.956884	99.6216	0.939413	-0.881186
		0.958104	99.3188	0.940612	-0.889379
		0.959325	99.0892	0.94181	-0.892874
		0.960545	98.9168	0.943008	-0.889684
		0.961766	98.7691	0.944206	-0.880544
		0.962986	98.7229	0.945404	-0.869729
		0.964207	98.5381	0.946603	-0.861431
		0.965427	98.2639	0.947801	-0.85514
		0.966648	97.8186	0.948999	-0.859096
		0.967868	97.2042	0.950197	-0.864152
		0.969089	96.4883	0.951396	-0.864457
		0.970309	95.7303	0.952594	-0.852945
		0.97153	95.0334	0.953792	-0.829914
		0.97275	94.3279	0.95499	-0.792568
		0.973971	93.6968	0.956189	-0.757587
		0.975191	93.0344	0.957387	-0.730079
		0.976412	92.3964	0.958585	-0.715279
		0.977632	91.7499	0.959783	-0.716167
		0.978853	91.0702	0.960981	-0.731114
		0.980073	90.3554	0.96218	-0.747699
		0.981294	89.5968	0.963378	-0.761882
		0.982514	88.7593	0.964576	-0.767924
		0.983735	87.9189	0.965774	-0.76581
		0.984955	87.0813	0.966973	-0.758234
		0.986176	86.2431	0.968171	-0.751899
		0.987396	85.254	0.969369	-0.744209
		0.988617	84.143	0.970567	-0.736131
		0.989838	82.9202	0.971766	-0.730627
		0.991058	81.4795	0.972964	-0.729254
		0.992279	80.1504	0.974162	-0.732674
		0.993499	78.8917	0.97536	-0.744557
		0.99472	77.688	0.976558	-0.763982
		0.99594	76.5181	0.977757	-0.780138
		0.997161	75.3932	0.978955	-0.802097
		0.998381	74.1731	0.980153	-0.816775
		0.999602	72.8814	0.981351	-0.822838
		1.00082	71.5166	0.98255	-0.822178
		1.00204	70.0433	0.983748	-0.804872
		1.00326	68.5292	0.984946	-0.781588
		1.00448	67.1235	0.986144	-0.761743
		1.0057	65.6956	0.987343	-0.747644
		1.00692	64.2025	0.988541	-0.746061
		1.00815	62.7438	0.989739	-0.751872
		1.00937	61.4102	0.990937	-0.768954
		1.01059	60.062	0.992136	-0.783643
		1.01181	59.0295	0.993334	-0.793298
		1.01303	58.1269	0.994532	-0.79882
		1.01425	57.1621	0.99573	-0.784488
		1.01547	56.3635	0.996928	-0.761368
		1.01669	55.5707	0.998127	-0.734122
		1.01791	54.5543	0.999325	-0.701494
		1.01913	53.5211	1.00052	-0.672131
		1.02035	52.4477	1.00172	-0.652211
		1.02157	51.435	1.00292	-0.642292
		1.02279	50.3794	1.00412	-0.64599
		1.02401	49.3711	1.00532	-0.666047
		1.02523	48.37	1.00651	-0.691528
		1.02645	47.3434	1.00771	-0.727888
		1.02767	46.3066	1.00891	-0.763913
		1.02889	45.3081	1.01011	-0.796008
		1.03011	44.3413	1.01131	-0.817395
		1.03134	43.3335	1.01251	-0.829321
		1.03256	42.3697	1.0137	-0.824038
		1.03378	41.4481	1.0149	-0.814044
		1.035	40.4286	1.0161	-0.805149
		1.03622	39.641	1.0173	-0.797365
		1.03744	38.9755	1.0185	-0.790039
		1.03866	38.0804	1.01969	-0.787368
		1.03988	37.3836	1.02089	-0.782505
		1.0411	36.5816	1.02209	-0.77738
		1.04232	35.5882	1.02329	-0.773372
		1.04354	34.5813	1.02449	-0.767121
		1.04476	33.5202	1.02569	-0.761422
		1.04598	32.563	1.02688	-0.756648
		1.0472	31.6638	1.02808	-0.750904
		1.04842	30.762	1.02928	-0.743175
		1.04964	29.8816	1.03048	-0.739321
		1.05086	28.9199	1.03168	-0.742844
		1.05208	27.9848	1.03288	-0.757178
		1.0533	27.0428	1.03407	-0.778455
		1.05452	26.1948	1.03527	-0.807732
		1.05575	25.2635	1.03647	-0.833884
		1.05697	24.3754	1.03767	-0.855617
		1.05819	23.6374	1.03887	-0.86687
		1.05941	22.9112	1.04006	-0.868275
		1.06063	22.1424	1.04126	-0.859497
		1.06185	21.3061	1.04246	-0.84891
		1.06307	20.2194	1.04366	-0.838076
		1.06429	19.1764	1.04486	-0.834749
		1.06551	18.3974	1.04606	-0.835253
		1.06673	17.4462	1.04725	-0.842186
		1.06795	16.3699	1.04845	-0.846711
		1.06917	15.3749	1.04965	-0.85315
		1.07039	14.2954	1.05085	-0.86285
		1.07161	13.2744	1.05205	-0.877153
		1.07283	12.2174	1.05325	-0.891675
		1.07405	11.0131	1.05444	-0.906763
		1.07527	9.70276	1.05564	-0.915396
		1.07649	8.07695	1.05684	-0.920669
		1.07771	6.37457	1.05804	-0.932364
		1.07894	4.37706	1.05924	-0.949414
		1.08016	2.32282	1.06043	-0.981196
		1.08138	0.485987	1.06163	-1.01842
		1.0826	-0.859674	1.06283	-1.05202
		1.08382	-2.27986	1.06403	-1.0729
		1.08504	-3.59529	1.06523	-1.08046
		1.08626	-4.7369	1.06643	-1.06857
		1.08748	-5.88389	1.06762	-1.05644
		1.0887	-7.04191	1.06882	-1.04744
		1.08992	-7.91013	1.07002	-1.04612
		1.09114	-8.875	1.07122	-1.05701
		1.09236	-9.88287	1.07242	-1.08401
		1.09358	-10.9002	1.07362	-1.11851
		1.0948	-12.0915	1.07481	-1.16172
		1.09602	-13.4678	1.07601	-1.20398
		1.09724	-15.0594	1.07721	-1.23705
		1.09846	-16.5978	1.07841	-1.25215
		1.09968	-18.3092	1.07961	-1.25828
		1.1009	-20.0441	1.0808	-1.25466
		1.10212	-21.6756	1.082	-1.2469
		1.10335	-23.0521	1.0832	-1.24649
		1.10457	-24.1705	1.0844	-1.25425
		1.10579	-24.9705	1.0856	-1.27115
		1.10701	-25.6743	1.0868	-1.30442
		1.10823	-26.3423	1.08799	-1.34526
		1.10945	-26.9796	1.08919	-1.38898
		1.11067	-27.7022	1.09039	-1.43103
		1.11189	-28.6122	1.09159	-1.4655
		1.11311	-29.7857	1.09279	-1.48509
		1.11433	-31.2948	1.09399	-1.49539
		1.11555	-32.6455	1.09518	-1.49779
		1.11677	-33.6501	1.09638	-1.49833
		1.11799	-34.48	1.09758	-1.50335
		1.11921	-35.157	1.09878	-1.51592
		1.12043	-35.6867	1.09998	-1.53466
		1.12165	-36.259	1.10117	-1.55641
		1.12287	-36.8632	1.10237	-1.5815
		1.12409	-37.4935	1.10357	-1.60546
		1.12531	-38.1107	1.10477	-1.6271
		1.12654	-38.7212	1.10597	-1.65
		1.12776	-39.3197	1.10717	-1.67207
		1.12898	-39.9632	1.10836	-1.69371
		1.1302	-40.6682	1.10956	-1.71519
		1.13142	-41.4051	1.11076	-1.73041
		1.13264	-42.1339	1.11196	-1.74301
		1.13386	-42.8916	1.11316	-1.75361
		1.13508	-43.5826	1.11436	-1.76332
		1.1363	-44.1959	1.11555	-1.77408
		1.13752	-44.7677	1.11675	-1.78949
		1.13874	-45.301	1.11795	-1.81008
		1.13996	-45.8579	1.11915	-1.83602
		1.14118	-46.4858	1.12035	-1.86606
		1.1424	-47.1058	1.12154	-1.89563
		1.14362	-47.6975	1.12274	-1.91653
		1.14484	-48.3841	1.12394	-1.92986
		1.14606	-48.8541	1.12514	-1.93826
		1.14728	-48.2505	1.12634	-1.94792
		1.1485	-47.6493	1.12754	-1.96378
		1.14972	-47.0342	1.12873	-1.98586
		1.15095	-46.5028	1.12993	-2.00923
		1.15217	-46.4699	1.13113	-2.02921
		1.15339	-46.9675	1.13233	-2.04328
		1.15461	-47.4617	1.13353	-2.05387
		1.15583	-48.0083	1.13473	-2.06263
		1.15705	-48.5856	1.13592	-2.07054
		1.15827	-49.038	1.13712	-2.07963
		1.15949	-49.3956	1.13832	-2.09138
		1.16071	-49.5669	1.13952	-2.10641
		1.16193	-49.6111	1.14072	-2.12318
		1.16315	-49.6066	1.14191	-2.13646
		1.16437	-49.5807	1.14311	-2.14653
		1.16559	-49.6551	1.14431	-2.14885
		1.16681	-49.8405	1.14551	-2.14659
		1.16803	-50.4412	1.14671	-2.1459
		1.16925	-51.1824	1.14791	-2.14977
		1.17047	-51.8989	1.1491	-2.1566
		1.17169	-52.1852	1.1503	-2.16624
		1.17291	-52.3227	1.1515	-2.17381
		1.17414	-52.2916	1.1527	-2.17808
		1.17536	-52.2075	1.1539	-2.17679
		1.17658	-52.1284	1.15509	-2.17001
		1.1778	-52.0583	1.15629	-2.15323
		1.17902	-52.0221	1.15749	-2.12386
		1.18024	-52.0173	1.15869	-2.08414
		1.18146	-52.0653	1.15989	-2.0402
		1.18268	-52.191	1.16109	-2.0033
		1.1839	-52.363	1.16228	-1.98016
		1.18512	-52.6306	1.16348	-1.97132
		1.18634	-52.9245	1.16468	-1.97434
		1.18756	-53.2517	1.16588	-1.98581
		1.18878	-53.5903	1.16708	-1.99672
		1.19	-53.8751	1.16828	-2.00709
		1.19122	-54.0978	1.16947	-2.01231
		1.19244	-54.1841	1.17067	-2.01385
		1.19366	-54.1923	1.17187	-2.01371
		1.19488	-54.1264	1.17307	-2.01264
		1.1961	-54.0189	1.17427	-2.00725
		1.19733	-53.9069	1.17546	-1.99794
		1.19855	-53.8001	1.17666	-1.98338
		1.19977	-53.7193	1.17786	-1.96276
		1.20099	-53.6897	1.17906	-1.93785
		1.20221	-53.7095	1.18026	-1.91973
		1.20343	-53.7661	1.18146	-1.90173
		1.20465	-53.8746	1.18265	-1.89016
		1.20587	-54.0077	1.18385	-1.88335
		1.20709	-54.1718	1.18505	-1.87916
		1.20831	-54.359	1.18625	-1.86999
		1.20953	-54.5895	1.18745	-1.86173
		1.21075	-54.8316	1.18865	-1.84986
		1.21197	-55.0756	1.18984	-1.83257
		1.21319	-55.2868	1.19104	-1.81363
		1.21441	-55.4384	1.19224	-1.78936
		1.21563	-55.499	1.19344	-1.76329
		1.21685	-55.4918	1.19464	-1.7382
		1.21807	-55.4476	1.19583	-1.71291
		1.21929	-55.3708	1.19703	-1.68877
		1.22051	-55.305	1.19823	-1.66407
		1.22174	-55.258	1.19943	-1.64379
		1.22296	-55.2191	1.20063	-1.62124
		1.22418	-55.1852	1.20183	-1.59729
		1.2254	-55.153	1.20302	-1.57044
		1.22662	-55.0913	1.20422	-1.53907
		1.22784	-55.0096	1.20542	-1.50239
		1.22906	-54.8916	1.20662	-1.46845
		1.23028	-54.7259	1.20782	-1.43653
		1.2315	-54.5471	1.20902	-1.407
		1.23272	-54.3365	1.21021	-1.3867
		1.23394	-54.1141	1.21141	-1.36966
		1.23516	-53.8969	1.21261	-1.35634
		1.23638	-53.7027	1.21381	-1.34789
		1.2376	-53.5305	1.21501	-1.34041
		1.23882	-53.398	1.2162	-1.33072
		1.24004	-53.3489	1.2174	-1.31725
		1.24126	-53.3401	1.2186	-1.29783
		1.24248	-53.3926	1.2198	-1.27205
		1.2437	-53.4803	1.221	-1.24566
		1.24493	-53.5847	1.2222	-1.21948
		1.24615	-53.6931	1.22339	-1.19794
		1.24737	-53.777	1.22459	-1.17794
		1.24859	-53.823	1.22579	-1.16014
		1.24981	-53.7753	1.22699	-1.13984
		1.25103	-53.616	1.22819	-1.12091
		1.25225	-53.4202	1.22939	-1.10109
		1.25347	-53.2587	1.23058	-1.08279
		1.25469	-53.0989	1.23178	-1.06767
		1.25591	-52.9404	1.23298	-1.05434
		1.25713	-52.7805	1.23418	-1.03997
		1.25835	-52.6225	1.23538	-1.02234
		1.25957	-52.4701	1.23657	-1.00304
		1.26079	-52.3234	1.23777	-0.979097
		1.26201	-52.1741	1.23897	-0.95662
		1.26323	-52.0239	1.24017	-0.933893
		1.26445	-51.8764	1.24137	-0.912697
		1.26567	-51.7109	1.24257	-0.893005
		1.26689	-51.5341	1.24376	-0.875226
		1.26811	-51.3527	1.24496	-0.859615
		1.26934	-51.1267	1.24616	-0.846555
		1.27056	-50.8874	1.24736	-0.835689
		1.27178	-50.66	1.24856	-0.824318
		1.273	-50.4256	1.24976	-0.807039
		1.27422	-50.2208	1.25095	-0.782919
		1.27544	-50.0265	1.25215	-0.752603
		1.27666	-49.8386	1.25335	-0.716774
		1.27788	-49.6675	1.25455	-0.680867
		1.2791	-49.5041	1.25575	-0.644873
		1.28032	-49.3381	1.25694	-0.609919
		1.28154	-49.1782	1.25814	-0.578021
		1.28276	-49.0104	1.25934	-0.547579
		1.28398	-48.7371	1.26054	-0.518147
		1.2852	-48.3875	1.26174	-0.49176
		1.28642	-47.9559	1.26294	-0.468609
		1.28764	-47.4802	1.26413	-0.445164
		1.28886	-46.9996	1.26533	-0.425835
		1.29008	-46.5178	1.26653	-0.403848
		1.2913	-46.0212	1.26773	-0.383547
		1.29253	-45.5393	1.26893	-0.362951
		1.29375	-45.0798	1.27013	-0.34408
		1.29497	-44.6244	1.27132	-0.32872
		1.29619	-44.1623	1.27252	-0.313471
		1.29741	-43.6887	1.27372	-0.297443
		1.29863	-43.1391	1.27492	-0.276356
		1.29985	-42.5106	1.27612	-0.251213
		1.30107	-41.9261	1.27731	-0.224743
		1.30229	-41.2249	1.27851	-0.200699
		1.30351	-40.4808	1.27971	-0.183509
		1.30473	-39.7844	1.28091	-0.174502
		1.30595	-39.1108	1.28211	-0.169204
		1.30717	-38.4851	1.28331	-0.165238
		1.30839	-37.954	1.2845	-0.158849
		1.30961	-37.464	1.2857	-0.148237
		1.31083	-37.0315	1.2869	-0.127909
		1.31205	-36.7161	1.2881	-0.102282
		1.31327	-36.4669	1.2893	-0.068497
		1.31449	-36.2544	1.2905	-0.030963
		1.31571	-36.042	1.29169	0.006569
		1.31694	-35.801	1.29289	0.040262
		1.31816	-35.3545	1.29409	0.072501
		1.31938	-34.7788	1.29529	0.095097
		1.3206	-34.1163	1.29649	0.112218
		1.32182	-33.4179	1.29768	0.122056
		1.32304	-32.7745	1.29888	0.128861
		1.32426	-32.1434	1.30008	0.137968
		1.32548	-31.5102	1.30128	0.149305
		1.3267	-30.9099	1.30248	0.165732
		1.32792	-30.334	1.30368	0.183625
		1.32914	-29.8141	1.30487	0.202887
		1.33036	-29.3424	1.30607	0.219978
		1.33158	-28.9246	1.30727	0.230551
		1.3328	-28.5059	1.30847	0.2371
		1.33402	-28.1018	1.30967	0.245015
		1.33524	-27.7024	1.31087	0.255158
		1.33646	-27.3017	1.31206	0.271666
		1.33768	-26.9014	1.31326	0.295588
		1.3389	-26.5024	1.31446	0.323132
		1.34013	-26.1123	1.31566	0.355189
		1.34135	-25.7434	1.31686	0.383491
		1.34257	-25.3871	1.31805	0.40837
		1.34379	-24.9781	1.31925	0.427723
		1.34501	-24.5255	1.32045	0.4402
		1.34623	-24.1048	1.32165	0.44928
		1.34745	-23.6954	1.32285	0.459445
		1.34867	-23.358	1.32405	0.47356
		1.34989	-23.1474	1.32524	0.48948
		1.35111	-22.9573	1.32644	0.516622
		1.35233	-22.6975	1.32764	0.5459
		1.35355	-22.3868	1.32884	0.579362
		1.35477	-22.0253	1.33004	0.609277
		1.35599	-21.6625	1.33123	0.633083
		1.35721	-21.3732	1.33243	0.645519
		1.35843	-21.1686	1.33363	0.654577
		1.35965	-20.9453	1.33483	0.657876
		1.36087	-20.681	1.33603	0.661569
		1.36209	-20.192	1.33723	0.666548
		1.36332	-19.6091	1.33842	0.673736
		1.36454	-18.9373	1.33962	0.682063
		1.36576	-18.3933	1.34082	0.690671
		1.36698	-18.0206	1.34202	0.695651
		1.3682	-17.7211	1.34322	0.699226
		1.36942	-17.3818	1.34442	0.696189
		1.37064	-17.0296	1.34561	0.695522
		1.37186	-16.6802	1.34681	0.699838
		1.37308	-16.2991	1.34801	0.711617
		1.3743	-15.8851	1.34921	0.73461
		1.37552	-15.4671	1.35041	0.768337
		1.37674	-15.1343	1.3516	0.80309
		1.37796	-14.9475	1.3528	0.838162
		1.37918	-14.9547	1.354	0.866786
		1.3804	-15.0305	1.3552	0.888906
		1.38162	-15.1149	1.3564	0.908554
		1.38284	-15.1878	1.3576	0.929331
		1.38406	-15.2215	1.35879	0.954184
		1.38528	-15.2244	1.35999	0.982689
		1.3865	-15.1505	1.36119	1.01227
		1.38773	-15.0028	1.36239	1.04475
		1.38895	-14.7632	1.36359	1.07924
		1.39017	-14.4068	1.36479	1.11805
		1.39139	-14.0106	1.36598	1.15305
		1.39261	-13.5691	1.36718	1.18137
		1.39383	-13.1226	1.36838	1.19748
		1.39505	-12.6656	1.36958	1.20985
		1.39627	-12.1613	1.37078	1.21874
		1.39749	-11.5085	1.37197	1.23427
		1.39871	-10.8053	1.37317	1.24943
		1.39993	-10.144	1.37437	1.26252
		1.40115	-9.50083	1.37557	1.27156
		1.40237	-8.94515	1.37677	1.26884
		1.40359	-8.47462	1.37797	1.26097
		1.40481	-8.03679	1.37916	1.25406
		1.40603	-7.63173	1.38036	1.25013
		1.40725	-7.25278	1.38156	1.25048
		1.40847	-6.87033	1.38276	1.25837
		1.40969	-6.47891	1.38396	1.27182
		1.41092	-6.07932	1.38516	1.28963
		1.41214	-5.6756	1.38635	1.30988
		1.41336	-5.26539	1.38755	1.32599
		1.41458	-4.84537	1.38875	1.32893
		1.4158	-4.4246	1.38995	1.32262
		1.41702	-3.994	1.39115	1.30848
		1.41824	-3.51997	1.39234	1.29433
		1.41946	-3.07073	1.39354	1.28397
		1.42068	-3.48663	1.39474	1.28535
		1.4219	-3.87417	1.39594	1.29388
		1.42312	-4.20079	1.39714	1.31299
		1.42434	-4.42259	1.39834	1.33778
		1.42556	-4.59702	1.39953	1.36262
		1.42678	-4.69111	1.40073	1.38412
		1.428	-4.7562	1.40193	1.4021
		1.42922	-4.82414	1.40313	1.41134
		1.43044	-4.91371	1.40433	1.41383
		1.43166	-5.03283	1.40553	1.41308
		1.43288	-5.1876	1.40672	1.40703
		1.4341	-5.35156	1.40792	1.40129
		1.43533	-5.50555	1.40912	1.39688
		1.43655	-5.66012	1.41032	1.39505
		1.43777	-5.7745	1.41152	1.39218
		1.43899	-5.88652	1.41271	1.40229
		1.44021	-5.99835	1.41391	1.41826
		1.44143	-6.12645	1.41511	1.44287
		1.44265	-6.16009	1.41631	1.48254
		1.44387	-6.02407	1.41751	1.52613
		1.44509	-5.56807	1.41871	1.56918
		1.44631	-5.1655	1.4199	1.60539
		1.44753	-4.79704	1.4211	1.62933
		1.44875	-4.29842	1.4223	1.63508
		1.44997	-3.76973	1.4235	1.63276
		1.45119	-3.36641	1.4247	1.61917
		1.45241	-2.84529	1.4259	1.60031
		1.45363	-2.20604	1.42709	1.58285
		1.45485	-1.65758	1.42829	1.57285
		1.45607	-1.05885	1.42949	1.57029
		1.45729	-0.412066	1.43069	1.58163
		1.45852	0.161844	1.43189	1.59693
		1.45974	0.799921	1.43308	1.60757
		1.46096	1.61405	1.43428	1.6108
		1.46218	2.22838	1.43548	1.60658
		1.4634	2.74588	1.43668	1.59503
		1.46462	3.3804	1.43788	1.58909
		1.46584	4.0077	1.43908	1.58835
		1.46706	4.68036	1.44027	1.59732
		1.46828	5.59804	1.44147	1.61285
		1.4695	6.44852	1.44267	1.63535
		1.47072	7.1365	1.44387	1.65509
		1.47194	7.90445	1.44507	1.67325
		1.47316	8.53983	1.44627	1.69233
		1.47438	8.94248	1.44746	1.70755
		1.4756	9.39657	1.44866	1.72419
		1.47682	9.51701	1.44986	1.74309
		1.47804	9.21942	1.45106	1.76162
		1.47926	8.93675	1.45226	1.77281
		1.48048	8.67317	1.45345	1.78194
		1.4817	8.42438	1.45465	1.78255
		1.48293	7.68289	1.45585	1.78159
		1.48415	6.49501	1.45705	1.78374
		1.48537	5.11651	1.45825	1.78442
		1.48659	4.37606	1.45945	1.78939
		1.48781	4.10486	1.46064	1.79809
		1.48903	3.91691	1.46184	1.8087
		1.49025	3.7671	1.46304	1.81639
		1.49147	3.64546	1.46424	1.82299
		1.49269	3.52865	1.46544	1.82119
		1.49391	3.40852	1.46664	1.81672
		1.49513	3.2877	1.46783	1.81595
		1.49635	3.19179	1.46903	1.81659
		1.49757	3.088	1.47023	1.82346
		1.49879	3.00774	1.47143	1.83317
		1.50001	2.96512	1.47263	1.84571
		1.50123	3.75157	1.47382	1.85876
		1.50245	4.91556	1.47502	1.87149
		1.50367	6.51852	1.47622	1.88324
		1.50489	8.25601	1.47742	1.89416
		1.50612	9.59337	1.47862	1.90652
		1.50734	9.8551	1.47982	1.92288
		1.50856	9.90505	1.48101	1.93731
		1.50978	9.96067	1.48221	1.94905
		1.511	10.0212	1.48341	1.95227
		1.51222	10.1025	1.48461	1.94976
		1.51344	10.21	1.48581	1.94248
		1.51466	10.3443	1.48701	1.94058
		1.51588	10.5067	1.4882	1.93962
		1.5171	10.6793	1.4894	1.95051
		1.51832	10.8659	1.4906	1.96333
		1.51954	11.0184	1.4918	1.97733
		1.52076	11.1428	1.493	1.98518
		1.52198	11.2341	1.49419	1.99401
		1.5232	11.3006	1.49539	1.99811
		1.52442	11.3614	1.49659	2.00309
		1.52564	11.4244	1.49779	2.01026
		1.52686	11.5156	1.49899	2.01381
		1.52808	11.6055	1.50019	2.01033
		1.52931	11.7007	1.50138	2.00364
		1.53053	11.7926	1.50258	1.99494
		1.53175	11.8761	1.50378	1.99062
		1.53297	11.9566	1.50498	1.99173
		1.53419	12.0512	1.50618	1.99934
		1.53541	12.1676	1.50737	2.00613
		1.53663	12.2932	1.50857	2.01089
		1.53785	12.3608	1.50977	2.0191
		1.53907	11.906	1.51097	2.02291
		1.54029	10.4468	1.51217	2.03164
		1.54151	9.05897	1.51337	2.03866
		1.54273	7.54034	1.51456	2.04385
		1.54395	7.03133	1.51576	2.05268
		1.54517	6.7453	1.51696	2.06208
		1.54639	6.47849	1.51816	2.07135
		1.54761	6.23214	1.51936	2.08123
		1.54883	6.02154	1.52056	2.09301
		1.55005	5.86634	1.52175	2.10003
		1.55127	5.76241	1.52295	2.10893
		1.55249	5.71459	1.52415	2.11492
		1.55372	5.70158	1.52535	2.11399
		1.55494	5.70207	1.52655	2.11254
		1.55616	5.7198	1.52774	2.11119
		1.55738	5.78778	1.52894	2.1141
		1.5586	5.8871	1.53014	2.12064
		1.55982	6.03466	1.53134	2.13336
		1.56104	6.22079	1.53254	2.14498
		1.56226	6.40573	1.53374	2.14827
		1.56348	6.59427	1.53493	2.14119
		1.5647	6.76703	1.53613	2.12468
		1.56592	6.92897	1.53733	2.09908
		1.56714	7.05016	1.53853	2.07597
		1.56836	7.14691	1.53973	2.06224
		1.56958	7.2258	1.54093	2.06102
		1.5708	7.33507	1.54212	2.07063
		1.57202	7.4486	1.54332	2.0931
		1.57324	7.56321	1.54452	2.11361
		1.57446	7.68098	1.54572	2.13555
		1.57568	7.79539	1.54692	2.15014
		1.57691	7.91749	1.54811	2.1603
		1.57813	8.06214	1.54931	2.16847
		1.57935	8.25102	1.55051	2.17663
		1.58057	8.47411	1.55171	2.17555
		1.58179	8.70652	1.55291	2.16723
		1.58301	8.92917	1.55411	2.15781
		1.58423	9.11545	1.5553	2.14251
		1.58545	9.28207	1.5565	2.13105
		1.58667	9.43969	1.5577	2.12634
		1.58789	9.62694	1.5589	2.12751
		1.58911	9.8361	1.5601	2.13044
		1.59033	10.0646	1.5613	2.13649
		1.59155	10.3128	1.56249	2.13789
		1.59277	10.5334	1.56369	2.13689
		1.59399	10.7327	1.56489	2.13865
		1.59521	10.9404	1.56609	2.14563
		1.59643	11.1457	1.56729	2.16305
		1.59765	11.3974	1.56848	2.18419
		1.59887	11.692	1.56968	2.20795
		1.60009	11.997	1.57088	2.21967
		1.60132	12.2625	1.57208	2.22542
		1.60254	12.4921	1.57328	2.2267
		1.60376	12.6716	1.57448	2.22545
		1.60498	12.8023	1.57567	2.23087
		1.6062	12.9309	1.57687	2.24298
		1.60742	13.0509	1.57807	2.25493
		1.60864	13.1721	1.57927	2.26707
		1.60986	13.2897	1.58047	2.27744
		1.61108	13.3863	1.58167	2.27792
		1.6123	13.4449	1.58286	2.26626
		1.61352	13.4827	1.58406	2.2497
		1.61474	13.4899	1.58526	2.22162
		1.61596	13.4924	1.58646	2.19672
		1.61718	13.5186	1.58766	2.17894
		1.6184	13.5664	1.58885	2.17643
		1.61962	13.6398	1.59005	2.18236
		1.62084	13.7656	1.59125	2.20592
		1.62206	13.9087	1.59245	2.22873
		1.62328	14.0635	1.59365	2.25183
		1.62451	14.224	1.59485	2.2688
		1.62573	14.371	1.59604	2.2816
		1.62695	14.5252	1.59724	2.28423
		1.62817	14.695	1.59844	2.28378
		1.62939	14.8617	1.59964	2.27186
		1.63061	15.0021	1.60084	2.24637
		1.63183	15.0845	1.60204	2.22138
		1.63305	15.0936	1.60323	2.19122
		1.63427	15.0625	1.60443	2.16744
		1.63549	14.9867	1.60563	2.1569
		1.63671	14.9201	1.60683	2.16108
		1.63793	14.8662	1.60803	2.17234
		1.63915	14.8613	1.60922	2.18922
		1.64037	14.8804	1.61042	2.19322
		1.64159	14.9436	1.61162	2.17715
		1.64281	15.0825	1.61282	2.14389
		1.64403	15.3201	1.61402	2.10995
		1.64525	15.6745	1.61522	2.07769
		1.64647	16.0284	1.61641	2.06129
		1.64769	16.2883	1.61761	2.05198
		1.64892	16.3016	1.61881	2.04631
		1.65014	16.1066	1.62001	2.03546
		1.65136	15.7351	1.62121	2.02296
		1.65258	15.2866	1.62241	2.01284
		1.6538	14.8603	1.6236	2.00949
		1.65502	14.4266	1.6248	2.01878
		1.65624	14.12	1.626	2.03025
		1.65746	13.8508	1.6272	2.03985
		1.65868	13.6726	1.6284	2.04968
		1.6599	13.6136	1.62959	2.05919
		1.66112	13.5699	1.63079	2.06512
		1.66234	13.5762	1.63199	2.07004
		1.66356	13.6012	1.63319	2.06305
		1.66478	13.5941	1.63439	2.04868
		1.666	13.6017	1.63559	2.03263
		1.66722	13.6026	1.63678	2.0142
		1.66844	13.5894	1.63798	1.9962
		1.66966	13.5611	1.63918	1.97972
		1.67088	13.5317	1.64038	1.96402
		1.67211	13.4896	1.64158	1.95173
		1.67333	13.4306	1.64278	1.95053
		1.67455	13.3615	1.64397	1.95689
		1.67577	13.2769	1.64517	1.96949
		1.67699	13.2149	1.64637	1.97986
		1.67821	13.1404	1.64757	1.98767
		1.67943	13.0824	1.64877	1.98839
		1.68065	13.0252	1.64996	1.99271
		1.68187	12.9229	1.65116	1.9962
		1.68309	12.7684	1.65236	2.00256
		1.68431	12.5784	1.65356	2.00552
		1.68553	12.3555	1.65476	2.00598
		1.68675	12.1135	1.65596	2.00145
		1.68797	11.8946	1.65715	2.00257
		1.68919	11.6959	1.65835	2.00501
		1.69041	11.5612	1.65955	2.00848
		1.69163	11.4591	1.66075	2.01629
		1.69285	11.3923	1.66195	2.02529
		1.69407	11.3479	1.66315	2.03566
		1.6953	11.2984	1.66434	2.04777
		1.69652	11.2556	1.66554	2.06106
		1.69774	11.2395	1.66674	2.06712
		1.69896	11.1985	1.66794	2.06984
		1.70018	11.1642	1.66914	2.06454
		1.7014	11.0648	1.67033	2.05327
		1.70262	10.9014	1.67153	2.03782
		1.70384	10.5043	1.67273	2.03037
		1.70506	10.0204	1.67393	2.02496
		1.70628	9.40359	1.67513	2.02603
		1.7075	8.87871	1.67633	2.03826
		1.70872	8.42977	1.67752	2.05177
		1.70994	8.14895	1.67872	2.06501
		1.71116	8.01457	1.67992	2.07594
		1.71238	7.94608	1.68112	2.08098
		1.7136	7.94149	1.68232	2.07845
		1.71482	7.93063	1.68351	2.07744
		1.71604	7.90878	1.68471	2.07744
		1.71726	7.83768	1.68591	2.08082
		1.71848	7.72597	1.68711	2.08765
		1.71971	7.59546	1.68831	2.09706
		1.72093	7.41444	1.68951	2.10531
		1.72215	7.23172	1.6907	2.11843
		1.72337	7.04324	1.6919	2.12952
		1.72459	6.88061	1.6931	2.14095
		1.72581	6.73021	1.6943	2.14637
		1.72703	6.60545	1.6955	2.148
		1.72825	6.48618	1.6967	2.13302
		1.72947	6.34996	1.69789	2.11463
		1.73069	6.15556	1.69909	2.09585
		1.73191	5.8851	1.70029	2.08792
		1.73313	5.57877	1.70149	2.08527
		1.73435	5.25941	1.70269	2.09979
		1.73557	4.99137	1.70388	2.11663
		1.73679	4.77631	1.70508	2.13541
		1.73801	4.64786	1.70628	2.15709
		1.73923	4.54457	1.70748	2.17776
		1.74045	4.47295	1.70868	2.19978
		1.74167	4.42243	1.70988	2.2263
		1.7429	4.38087	1.71107	2.25122
		1.74412	4.35119	1.71227	2.26985
		1.74534	4.33259	1.71347	2.28547
		1.74656	4.32329	1.71467	2.29111
		1.74778	4.32312	1.71587	2.28972
		1.749	4.32335	1.71707	2.28701
		1.75022	4.32362	1.71826	2.27675
		1.75144	4.33125	1.71946	2.26274
		1.75266	4.34945	1.72066	2.24775
		1.75388	4.37252	1.72186	2.23718
		1.7551	4.3993	1.72306	2.23443
		1.75632	4.4121	1.72425	2.24449
		1.75754	4.4015	1.72545	2.26328
		1.75876	4.36986	1.72665	2.28198
		1.75998	4.31593	1.72785	2.29146
		1.7612	4.2486	1.72905	2.29302
		1.76242	4.17906	1.73025	2.27803
		1.76364	4.09516	1.73144	2.25657
		1.76486	4.00844	1.73264	2.23452
		1.76608	3.92581	1.73384	2.21373
		1.76731	3.85114	1.73504	2.19366
		1.76853	3.81173	1.73624	2.18616
		1.76975	3.80236	1.73744	2.18422
		1.77097	3.82645	1.73863	2.19122
		1.77219	3.84753	1.73983	2.21015
		1.77341	3.87422	1.74103	2.23156
		1.77463	3.89375	1.74223	2.25094
		1.77585	3.90142	1.74343	2.26837
		1.77707	3.90919	1.74462	2.27629
		1.77829	3.91035	1.74582	2.2746
		1.77951	3.9108	1.74702	2.26802
		1.78073	3.8949	1.74822	2.26179
		1.78195	3.87708	1.74942	2.25874
		1.78317	3.85659	1.75062	2.25648
		1.78439	3.8275	1.75181	2.26977
		1.78561	3.79825	1.75301	2.28447
		1.78683	3.76179	1.75421	2.31765
		1.78805	3.72024	1.75541	2.35574
		1.78927	3.66742	1.75661	2.39504
		1.7905	3.61973	1.75781	2.41649
		1.79172	3.57604	1.759	2.42844
		1.79294	3.53143	1.7602	2.41441
		1.79416	3.4792	1.7614	2.3907
		1.79538	3.40453	1.7626	2.36585
		1.7966	3.31519	1.7638	2.33491
		1.79782	3.21849	1.76499	2.3079
		1.79904	3.12986	1.76619	2.28714
		1.80026	3.05209	1.76739	2.26915
		1.80148	2.97132	1.76859	2.25646
		1.8027	2.89791	1.76979	2.25199
		1.80392	2.80756	1.77099	2.25208
		1.80514	2.69502	1.77218	2.25293
		1.80636	2.57718	1.77338	2.2528
		1.80758	2.45238	1.77458	2.25139
		1.8088	2.32921	1.77578	2.24576
		1.81002	2.21043	1.77698	2.2456
		1.81124	2.10295	1.77818	2.24378
		1.81246	1.99776	1.77937	2.24625
		1.81368	1.88871	1.78057	2.24843
		1.81491	1.80194	1.78177	2.24411
		1.81613	1.71755	1.78297	2.23665
		1.81735	1.63105	1.78417	2.22628
		1.81857	1.55882	1.78536	2.21403
		1.81979	1.4438	1.78656	2.20441
		1.82101	1.30619	1.78776	2.19807
		1.82223	1.14009	1.78896	2.19226
		1.82345	0.918694	1.79016	2.18346
		1.82467	0.668281	1.79136	2.17551
		1.82589	0.351367	1.79255	2.16644
		1.82711	-0.103454	1.79375	2.15736
		1.82833	-0.686467	1.79495	2.14712
		1.82955	-1.36918	1.79615	2.13756
		1.83077	-1.96139	1.79735	2.13013
		1.83199	-2.47048	1.79855	2.12558
		1.83321	-2.79786	1.79974	2.13418
		1.83443	-3.04499	1.80094	2.14647
		1.83565	-3.22655	1.80214	2.16403
		1.83687	-3.36406	1.80334	2.18082
		1.8381	-3.49977	1.80454	2.1916
		1.83932	-3.64216	1.80573	2.19534
		1.84054	-3.80046	1.80693	2.19328
		1.84176	-3.95985	1.80813	2.18334
		1.84298	-4.11904	1.80933	2.17286
		1.8442	-4.26004	1.81053	2.16233
		1.84542	-4.38951	1.81173	2.16026
		1.84664	-4.50854	1.81292	2.16417
		1.84786	-4.6195	1.81412	2.17952
		1.84908	-4.69722	1.81532	2.19818
		1.8503	-4.76459	1.81652	2.21669
		1.85152	-4.81665	1.81772	2.23744
		1.85274	-4.8465	1.81892	2.25307
		1.85396	-4.88834	1.82011	2.26549
		1.85518	-4.92027	1.82131	2.27572
		1.8564	-4.94407	1.82251	2.28907
		1.85762	-4.95831	1.82371	2.29746
		1.85884	-4.94628	1.82491	2.30674
		1.86006	-4.91529	1.8261	2.31375
		1.86129	-4.87823	1.8273	2.3087
		1.86251	-4.83162	1.8285	2.30285
		1.86373	-4.79733	1.8297	2.29787
		1.86495	-4.77625	1.8309	2.29687
		1.86617	-4.75101	1.8321	2.30105
		1.86739	-4.74087	1.83329	2.31336
		1.86861	-4.72906	1.83449	2.32421
		1.86983	-4.70839	1.83569	2.33702
		1.87105	-4.68398	1.83689	2.34303
		1.87227	-4.66533	1.83809	2.34204
		1.87349	-4.66169	1.83929	2.33111
		1.87471	-4.72777	1.84048	2.31998
		1.87593	-4.85817	1.84168	2.30673
		1.87715	-5.06556	1.84288	2.29684
		1.87837	-5.31281	1.84408	2.28881
		1.87959	-5.57091	1.84528	2.27602
		1.88081	-5.80844	1.84647	2.25723
		1.88203	-6.00712	1.84767	2.2393
		1.88325	-6.20398	1.84887	2.22251
		1.88447	-6.35324	1.85007	2.21301
		1.8857	-6.51158	1.85127	2.22269
		1.88692	-6.69376	1.85247	2.24015
		1.88814	-6.87728	1.85366	2.26198
		1.88936	-7.06406	1.85486	2.28124
		1.89058	-7.23779	1.85606	2.29895
		1.8918	-7.39044	1.85726	2.30489
		1.89302	-7.51333	1.85846	2.30972
		1.89424	-7.62882	1.85965	2.30905
		1.89546	-7.781	1.86085	2.30015
		1.89668	-7.94395	1.86205	2.28993
		1.8979	-8.16825	1.86325	2.28376
		1.89912	-8.42326	1.86445	2.28392
		1.90034	-8.6896	1.86565	2.29446
		1.90156	-8.95881	1.86684	2.31762
		1.90278	-9.20519	1.86804	2.34202
		1.904	-9.43574	1.86924	2.35894
		1.90522	-9.61454	1.87044	2.36657
		1.90644	-9.78464	1.87164	2.3598
		1.90766	-9.93542	1.87284	2.34266
		1.90889	-10.057
		1.91011	-10.1784
		1.91133	-10.2791
		1.91255	-10.3548
		1.91377	-10.4158
		1.91499	-10.4458
		1.91621	-10.4586
		1.91743	-10.4562
		1.91865	-10.4503
		1.91987	-10.4505
		1.92109	-10.4581
		1.92231	-10.4927
		1.92353	-10.5453
		1.92475	-10.6206
		1.92597	-10.7176
