# Supplementary material for: Mechanical instability and interfacial energy drive biofilm morphogenesis
Source: eLife. 2019 Mar 8;8:e43920. doi: 10.7554/eLife.43920 (PMC6453567; doi:10.7554/eLife.43920)
Supplement: Figure 3—source data 1. [file elife-43920-fig3-data1.xlsx]

## Sheet: Figure 3
		Figure 3D
Description		Data obtained from bright field steroscope images. Data are represented as Nb (number of blisters) , Nf (number of non-blister features) and 𝝆 (Nb/(Nb+Nf)) for each biological copy. See figure legend for more details.
Condition
Computed/Measured quantity
<Average>		Agar conc.	Biofilm ID	𝝆	Nb	Nf
		0.005	1	0.152	19	106
			2	0.146341	18	105
			3	0.186992	23	100
			4	0.139344	17	105
		<𝝆>	5	0.185185	20	88
		0.160187	6	0.151261	18	101
		Agar conc.	Biofilm ID	𝝆	Nb	Nf
		0.006	1	0.302326	39	90
			2	0.24812	33	100
			3	0.295082	36	86
			4	0.222222	28	98
		<𝝆>	5	0.274809	36	95
		0.268115	6	0.266129	33	91
		Agar conc.	Biofilm ID	𝝆	Nb	Nf
		0.007	1	0.336634	34	67
			2	0.372549	38	64
			3	0.413462	43	61
			4	0.385542	32	51
		<𝝆>	5	0.359223	37	66
		0.372638	6	0.368421	35	60
		Agar conc.	Biofilm ID	𝝆	Nb	Nf
		0.008	1	0.481203	64	69
			2	0.471074	57	64
			3	0.477876	54	59
			4	0.486486	54	57
		<𝝆>	5	0.461538	60	70
		0.481909	6	0.513274	58	55
		Agar conc.	Biofilm ID	𝝆	Nb	Nf
		0.01	1	0.767123	56	17
			2	0.8	56	14
			3	0.646341	53	29
			4	0.821918	60	13
		<𝝆>	5	0.75	60	20
		0.750239	6	0.716049	58	23
		Agar conc.	Biofilm ID	𝝆	Nb	Nf
		0.015	1	0.88	44	6
			2	0.92	46	4
			3	0.803571	45	11
			4	0.887097	55	7
		<𝝆>	5	0.912281	52	5
		0.877503	6	0.862069	50	8
