# Supplementary material for: Mechanical instability and interfacial energy drive biofilm morphogenesis
Source: eLife. 2019 Mar 8;8:e43920. doi: 10.7554/eLife.43920 (PMC6453567; doi:10.7554/eLife.43920)
Supplement: Figure 4—figure supplement 1—source data 1. [file elife-43920-fig4-figsupp1-data1.xlsx]

## Sheet: Figure 4 - figure supplement 1
		Figure 4 - figure supplement 1A
Description		Data extracted using customized Matlab code. Same as data in Figure 2A.
Computed/Measured quantity
		t (h)	r (mm)	N
		27.5	0.6917	18
		28.75	0.6917	18
		22.5	0.6917	12
		16.25	0.6917	9
		73.75	0.6917	9
		6.25	0.76087	18
		17.5	0.76087	9
		41.25	0.76087	9
		47.5	0.76087	9
		51.25	0.76087	9
		13.75	0.83004	15
		23.75	0.83004	15
		27.5	0.83004	15
		18.75	0.83004	9
		40	0.83004	9
		12.5	0.89921	16
		20	0.89921	15
		30	0.89921	15
		31.25	0.89921	15
		32.5	0.89921	15
		25	0.96838	23
		12.5	0.96838	15
		21.25	0.96838	11
		15	0.96838	9
		6.25	1.03755	47
		20	1.03755	18
		22.5	1.03755	16
		13.75	1.03755	15
		12.5	1.03755	13
		21.25	1.10672	18
		25	1.10672	18
		16.25	1.10672	15
		13.75	1.10672	13
		12.5	1.10672	12
		13.75	1.17589	23
		22.5	1.17589	18
		23.75	1.17589	16
		25	1.17589	16
		17.5	1.17589	15
		13.75	1.24506	23
		16.25	1.24506	20
		23.75	1.24506	18
		26.25	1.24506	18
		27.5	1.24506	18
		17.5	1.31423	39
		12.5	1.31423	28
		15	1.31423	22
		21.25	1.31423	20
		25	1.31423	14
		13.75	1.3834	23
		25	1.3834	22
		26.25	1.3834	20
		27.5	1.3834	20
		12.5	1.45257	25
		26.25	1.45257	22
		27.5	1.45257	22
		13.75	1.45257	20
		30	1.45257	18
		55	1.52174	13
		60	1.52174	13
		62.5	1.52174	13
		63.75	1.52174	13
		65	1.52174	13
		31.25	1.59091	22
		61.25	1.59091	13
		68.75	1.59091	13
		70	1.59091	13
		71.25	1.59091	13
		51.25	1.66008	26
		36.25	1.66008	19
		37.5	1.66008	19
		38.75	1.66008	19
		40	1.66008	19
		33.75	1.72925	22
		35	1.72925	22
		36.25	1.72925	22
		37.5	1.72925	19
		26.25	1.72925	18
		35	1.79842	24
		36.25	1.79842	24
		37.5	1.79842	24
		38.75	1.79842	24
		40	1.79842	24
		22.5	1.86759	30
		28.75	1.86759	24
		30	1.86759	24
		31.25	1.86759	24
		32.5	1.86759	24
		22.5	1.93676	33
		23.75	1.93676	30
		18.75	1.93676	25
		20	1.93676	25
		30	1.93676	24
		40	2.00593	39
		41.25	2.00593	39
		42.5	2.00593	39
		45	2.00593	39
		23.75	2.00593	33
		31.25	2.0751	39
		32.5	2.0751	39
		33.75	2.0751	39
		35	2.0751	39
		36.25	2.0751	39
		28.75	2.14427	41
		20	2.14427	39
		30	2.14427	39
		31.25	2.14427	39
		32.5	2.14427	39
		28.75	2.21344	41
		30	2.21344	39
		31.25	2.21344	39
		32.5	2.21344	39
		33.75	2.21344	39
		27.5	2.28261	44
		28.75	2.28261	41
		20	2.28261	40
		21.25	2.28261	39
		30	2.28261	39
		30	2.35178	41
		28.75	2.35178	40
		31.25	2.35178	39
		32.5	2.35178	39
		33.75	2.35178	39
		18.75	2.42095	44
		20	2.42095	44
		21.25	2.42095	40
		30	2.42095	40
		31.25	2.42095	40
		35	2.49012	50
		36.25	2.49012	50
		40	2.49012	50
		37.5	2.49012	45
		20	2.49012	44
		21.25	2.55929	46
		41.25	2.55929	45
		42.5	2.55929	45
		23.75	2.55929	38
		25	2.55929	37
		20	2.62846	50
		22.5	2.62846	46
		36.25	2.62846	45
		37.5	2.62846	45
		38.75	2.62846	45
		35	2.69763	51
		36.25	2.69763	51
		37.5	2.69763	51
		38.75	2.69763	51
		40	2.69763	51
		35	2.7668	51
		36.25	2.7668	51
		37.5	2.7668	51
		38.75	2.7668	51
		43.75	2.7668	51
		40	2.83597	54
		45	2.83597	54
		43.75	2.83597	51
		47.5	2.83597	51
		35	2.83597	50
		42.5	2.90514	56
		22.5	2.90514	50
		33.75	2.90514	50
		35	2.90514	50
		36.25	2.90514	50
		22.5	2.97431	47
		43.75	2.97431	42
		25	2.97431	41
		23.75	2.97431	38
		26.25	2.97431	38
		23.75	3.04348	47
		22.5	3.04348	46
		27.5	3.04348	46
		25	3.04348	38
		26.25	3.04348	38
		23.75	3.11265	47
		32.5	3.11265	47
		43.75	3.11265	47
		46.25	3.11265	47
		22.5	3.11265	46
		25	3.18182	47
		31.25	3.18182	47
		32.5	3.18182	47
		33.75	3.18182	47
		35	3.18182	47
		25	3.25099	47
		31.25	3.25099	47
		32.5	3.25099	47
		33.75	3.25099	47
		35	3.25099	47
		30	3.32016	50
		31.25	3.32016	50
		32.5	3.32016	50
		25	3.32016	47
		26.25	3.32016	47
		28.75	3.38933	50
		30	3.38933	50
		31.25	3.38933	50
		32.5	3.38933	50
		33.75	3.38933	50
		41.25	3.4585	51
		42.5	3.4585	51
		28.75	3.4585	50
		30	3.4585	50
		31.25	3.4585	50
		45	3.52767	51
		46.25	3.52767	51
		30	3.52767	50
		31.25	3.52767	50
		32.5	3.52767	50
		42.5	3.59684	59
		43.75	3.59684	59
		45	3.59684	59
		46.25	3.59684	59
		48.75	3.59684	59
		38.75	3.66601	62
		40	3.66601	62
		41.25	3.66601	62
		42.5	3.66601	62
		43.75	3.66601	62
		27.5	3.73518	67
		28.75	3.73518	67
		30	3.73518	67
		32.5	3.73518	67
		33.75	3.73518	62
		28.75	3.80435	67
		30	3.80435	67
		31.25	3.80435	67
		32.5	3.80435	67
		33.75	3.80435	67
		27.5	3.87352	67
		28.75	3.87352	67
		30	3.87352	67
		31.25	3.87352	67
		32.5	3.87352	67
		27.5	3.94269	67
		28.75	3.94269	67
		30	3.94269	67
		31.25	3.94269	67
		32.5	3.94269	67
		28.75	4.01186	67
		30	4.01186	67
		31.25	4.01186	67
		32.5	4.01186	67
		33.75	4.01186	67
		28.75	4.08103	67
		30	4.08103	67
		31.25	4.08103	67
		32.5	4.08103	67
		33.75	4.08103	67
		61.25	4.1502	68
		28.75	4.1502	67
		30	4.1502	67
		31.25	4.1502	67
		32.5	4.1502	67
		30	4.21937	67
		31.25	4.21937	67
		32.5	4.21937	67
		33.75	4.21937	67
		35	4.21937	67
		61.25	4.28854	68
		30	4.28854	67
		31.25	4.28854	67
		32.5	4.28854	67
		33.75	4.28854	67
		61.25	4.35771	68
		30	4.35771	67
		31.25	4.35771	67
		32.5	4.35771	67
		33.75	4.35771	67
		61.25	4.42688	68
		30	4.42688	67
		31.25	4.42688	67
		32.5	4.42688	67
		33.75	4.42688	67
		61.25	4.49605	68
		31.25	4.49605	67
		32.5	4.49605	67
		33.75	4.49605	67
		35	4.49605	67
		61.25	4.56522	68
		31.25	4.56522	67
		32.5	4.56522	67
		33.75	4.56522	67
		35	4.56522	67
		32.5	4.63439	67
		33.75	4.63439	67
		35	4.63439	67
		36.25	4.63439	67
		37.5	4.63439	67
		32.5	4.70356	67
		33.75	4.70356	67
		35	4.70356	67
		36.25	4.70356	67
		37.5	4.70356	67
		32.5	4.77273	67
		33.75	4.77273	67
		35	4.77273	67
		36.25	4.77273	67
		37.5	4.77273	67
		32.5	4.8419	73
		33.75	4.8419	67
		35	4.8419	67
		36.25	4.8419	67
		37.5	4.8419	67
		32.5	4.91107	73
		33.75	4.91107	67
		35	4.91107	67
		36.25	4.91107	67
		37.5	4.91107	67
		47.5	4.98024	78
		50	4.98024	78
		51.25	4.98024	78
		52.5	4.98024	78
		32.5	4.98024	73
		43.75	5.04941	78
		47.5	5.04941	78
		48.75	5.04941	78
		50	5.04941	78
		51.25	5.04941	78
		50	5.11858	86
		51.25	5.11858	86
		52.5	5.11858	86
		53.75	5.11858	86
		55	5.11858	86
		45	5.18775	86
		46.25	5.18775	86
		52.5	5.18775	86
		53.75	5.18775	86
		55	5.18775	86
		40	5.25692	83
		46.25	5.25692	83
		47.5	5.25692	83
		48.75	5.25692	83
		50	5.25692	83
		61.25	5.32609	94
		40	5.32609	83
		45	5.32609	83
		46.25	5.32609	83
		47.5	5.32609	83
		61.25	5.39526	94
		53.75	5.39526	93
		55	5.39526	93
		56.25	5.39526	93
		57.5	5.39526	93
		47.5	5.46443	93
		48.75	5.46443	93
		50	5.46443	93
		51.25	5.46443	93
		52.5	5.46443	93
		33.75	5.5336	93
		35	5.5336	93
		36.25	5.5336	93
		37.5	5.5336	93
		43.75	5.5336	93
		40	5.60277	105
		41.25	5.60277	105
		45	5.60277	105
		46.25	5.60277	105
		35	5.60277	93
		55	5.67194	106
		56.25	5.67194	106
		40	5.67194	105
		42.5	5.67194	105
		43.75	5.67194	105
		40	5.74111	105
		41.25	5.74111	105
		42.5	5.74111	105
		43.75	5.74111	105
		45	5.74111	105
		40	5.81028	105
		41.25	5.81028	105
		42.5	5.81028	105
		43.75	5.81028	105
		45	5.81028	105
		40	5.87945	105
		41.25	5.87945	105
		42.5	5.87945	105
		43.75	5.87945	105
		45	5.87945	105
		47.5	5.94862	106
		50	5.94862	106
		38.75	5.94862	105
		40	5.94862	105
		41.25	5.94862	105
		43.75	6.01779	106
		47.5	6.01779	106
		50	6.01779	106
		40	6.01779	105
		41.25	6.01779	105
		37.5	6.08696	106
		43.75	6.08696	106
		47.5	6.08696	106
		50	6.08696	106
		38.75	6.08696	105
		37.5	6.15613	106
		38.75	6.15613	106
		43.75	6.15613	106
		47.5	6.15613	106
		50	6.15613	106
		37.5	6.2253	106
		38.75	6.2253	106
		42.5	6.2253	106
		43.75	6.2253	106
		47.5	6.2253	106
		37.5	6.29447	106
		38.75	6.29447	106
		42.5	6.29447	106
		43.75	6.29447	106
		47.5	6.29447	106
		60	6.36364	112
		62.5	6.36364	112
		63.75	6.36364	112
		38.75	6.36364	106
		42.5	6.36364	106
		57.5	6.43281	112
		58.75	6.43281	112
		60	6.43281	112
		37.5	6.43281	106
		38.75	6.43281	106
		53.75	6.50198	115
		55	6.50198	115
		56.25	6.50198	115
		57.5	6.50198	115
		58.75	6.50198	115
		53.75	6.57115	115
		55	6.57115	115
		56.25	6.57115	115
		57.5	6.57115	115
		58.75	6.57115	115
		55	6.64032	115
		56.25	6.64032	115
		57.5	6.64032	112
		58.75	6.64032	112
		60	6.64032	112
		58.75	6.70949	112
		60	6.70949	112
		41.25	6.70949	106
		42.5	6.70949	106
		43.75	6.70949	106
		58.75	6.77866	112
		60	6.77866	112
		41.25	6.77866	106
		42.5	6.77866	106
		43.75	6.77866	106
		58.75	6.84783	112
		60	6.84783	112
		42.5	6.84783	106
		43.75	6.84783	106
		45	6.84783	106
		42.5	6.917	106
		43.75	6.917	106
		45	6.917	106
		46.25	6.917	106
		47.5	6.917	106
		55	6.98617	128
		57.5	6.98617	128
		58.75	6.98617	128
		42.5	6.98617	106
		43.75	6.98617	106
		52.5	7.05534	128
		53.75	7.05534	128
		55	7.05534	128
		56.25	7.05534	128
		57.5	7.05534	128
		52.5	7.12451	128
		53.75	7.12451	128
		55	7.12451	128
		56.25	7.12451	128
		57.5	7.12451	128
		48.75	7.19368	128
		51.25	7.19368	128
		52.5	7.19368	128
		53.75	7.19368	128
		55	7.19368	128
		47.5	7.26285	128
		48.75	7.26285	128
		50	7.26285	128
		51.25	7.26285	128
		52.5	7.26285	128
		56.25	7.33202	137
		57.5	7.33202	137
		48.75	7.33202	128
		50	7.33202	128
		51.25	7.33202	128
		53.75	7.40119	137
		55	7.40119	137
		56.25	7.40119	137
		57.5	7.40119	137
		58.75	7.40119	137
		51.25	7.47036	137
		52.5	7.47036	137
		53.75	7.47036	137
		55	7.47036	137
		56.25	7.47036	137
		51.25	7.53953	137
		52.5	7.53953	137
		53.75	7.53953	137
		55	7.53953	137
		56.25	7.53953	137
		51.25	7.6087	137
		52.5	7.6087	137
		53.75	7.6087	137
		55	7.6087	137
		56.25	7.6087	137
		47.5	7.67787	141
		51.25	7.67787	137
		52.5	7.67787	137
		53.75	7.67787	137
		55	7.67787	137
		47.5	7.74704	141
		51.25	7.74704	137
		52.5	7.74704	137
		53.75	7.74704	137
		55	7.74704	137
		47.5	7.81621	141
		51.25	7.81621	137
		52.5	7.81621	137
		53.75	7.81621	137
		55	7.81621	137
		51.25	7.88538	137
		52.5	7.88538	137
		53.75	7.88538	137
		55	7.88538	137
		56.25	7.88538	137
		52.5	7.95455	137
		53.75	7.95455	137
		55	7.95455	137
		56.25	7.95455	137
		57.5	7.95455	137
		52.5	8.02372	137
		53.75	8.02372	137
		55	8.02372	137
		56.25	8.02372	137
		57.5	8.02372	137
		53.75	8.09289	137
		55	8.09289	137
		56.25	8.09289	137
		57.5	8.09289	137
		58.75	8.09289	137
		52.5	8.16206	134
		53.75	8.16206	134
		55	8.16206	134
		56.25	8.16206	134
		57.5	8.16206	134
		53.75	8.23123	134
		55	8.23123	134
		56.25	8.23123	134
		57.5	8.23123	134
		50	8.23123	119
		53.75	8.3004	134
		55	8.3004	134
		56.25	8.3004	134
		57.5	8.3004	134
		58.75	8.3004	134
		55	8.36957	134
		56.25	8.36957	134
		57.5	8.36957	134
		58.75	8.36957	134
		51.25	8.36957	119
		53.75	8.43874	162
		55	8.43874	134
		56.25	8.43874	134
		57.5	8.43874	134
		58.75	8.43874	134
		53.75	8.50791	162
		56.25	8.50791	134
		57.5	8.50791	134
		52.5	8.50791	119
		55	8.50791	27
		53.75	8.57708	162
		55	8.57708	134
		56.25	8.57708	134
		52.5	8.57708	114
		57.5	8.57708	27
		53.75	8.64625	162
		55	8.64625	162
		56.25	8.64625	27
		57.5	8.64625	27
		58.75	8.64625	27
		55	8.71542	162
		53.75	8.71542	114
		56.25	8.71542	27
		57.5	8.71542	27
		58.75	8.71542	27
		55	8.78459	117
		56.25	8.78459	27
		57.5	8.78459	27
		58.75	8.78459	27
		60	8.78459	27
		56.25	8.85376	67
		57.5	8.85376	67
		55	8.85376	28
		58.75	8.85376	27
		60	8.85376	27
		56.25	8.92293	67
		57.5	8.92293	67
		58.75	8.92293	67
		60	8.92293	27
		61.25	8.92293	27
		56.25	8.9921	67
		57.5	8.9921	67
		58.75	8.9921	67
		60	8.9921	27
		61.25	8.9921	27
		57.5	9.06127	67
		58.75	9.06127	67
		60	9.06127	67
		61.25	9.06127	27
		62.5	9.06127	27
		57.5	9.13044	67
		58.75	9.13044	67
		60	9.13044	67
		61.25	9.13044	27
		62.5	9.13044	27
		57.5	9.19961	67
		58.75	9.19961	67
		60	9.19961	67
		61.25	9.19961	27
		62.5	9.19961	27
		58.75	9.26878	67
		60	9.26878	67
		62.5	9.26878	67
		61.25	9.26878	27
		63.75	9.26878	27
		58.75	9.33795	67
		60	9.33795	67
		62.5	9.33795	67
		61.25	9.33795	27
		63.75	9.33795	27
		60	9.40712	67
		62.5	9.40712	67
		63.75	9.40712	67
		61.25	9.40712	27
		65	9.40712	27
		60	9.47629	67
		62.5	9.47629	67
		63.75	9.47629	67
		61.25	9.47629	27
		65	9.47629	27
		62.5	9.54546	67
		63.75	9.54546	67
		61.25	9.54546	66
		65	9.54546	27
		66.25	9.54546	27
		61.25	9.61463	89
		63.75	9.61463	89
		65	9.61463	89
		62.5	9.61463	67
		66.25	9.61463	27
		63.75	9.6838	89
		65	9.6838	89
		62.5	9.6838	67
		66.25	9.6838	27
		67.5	9.6838	27
		63.75	9.75297	89
		65	9.75297	89
		66.25	9.75297	89
		62.5	9.75297	67
		67.5	9.75297	27
		63.75	9.82214	89
		65	9.82214	89
		66.25	9.82214	89
		67.5	9.82214	27
		68.75	9.82214	27
		63.75	9.89131	121
		65	9.89131	89
		66.25	9.89131	89
		77.5	9.89131	49
		67.5	9.89131	27
		65	9.96048	89
		66.25	9.96048	89
		75	9.96048	53
		76.25	9.96048	53
		77.5	9.96048	53
		65	10.0297	121
		72.5	10.0297	53
		73.75	10.0297	53
		75	10.0297	53
		76.25	10.0297	53
		71.25	10.0988	53
		72.5	10.0988	53
		73.75	10.0988	53
		75	10.0988	53
		76.25	10.0988	53
		68.75	10.168	53
		70	10.168	53
		71.25	10.168	53
		72.5	10.168	53
		73.75	10.168	53
		68.75	10.2372	53
		70	10.2372	53
		71.25	10.2372	53
		72.5	10.2372	53
		73.75	10.2372	53
		67.5	10.3063	53
		68.75	10.3063	53
		70	10.3063	53
		71.25	10.3063	53
		72.5	10.3063	53
		68.75	10.3755	53
		70	10.3755	53
		71.25	10.3755	53
		72.5	10.3755	53
		73.75	10.3755	53
		68.75	10.4447	53
		70	10.4447	53
		71.25	10.4447	53
		72.5	10.4447	53
		73.75	10.4447	53
		68.75	10.5138	53
		70	10.5138	53
		71.25	10.5138	53
		72.5	10.5138	53
		73.75	10.5138	53
		70	10.583	53
		71.25	10.583	53
		72.5	10.583	53
		73.75	10.583	53
		75	10.583	53
		71.25	10.6522	53
		72.5	10.6522	53
		73.75	10.6522	53
		75	10.6522	53
		76.25	10.6522	53
		73.75	10.7213	53
		75	10.7213	53
		71.25	10.7213	46
		72.5	10.7213	46
		76.25	10.7213	46
		72.5	10.7905	89
		73.75	10.7905	53
		75	10.7905	46
		76.25	10.7905	46
		77.5	10.7905	46
		72.5	10.8597	89
		73.75	10.8597	89
		77.5	10.8597	52
		75	10.8597	17
		76.25	10.8597	17
		73.75	10.9289	89
		72.5	10.9289	37
		75	10.9289	17
		76.25	10.9289	17
		77.5	10.9289	17
		73.75	10.998	37
		75	10.998	17
		76.25	10.998	17
		77.5	10.998	17
		67.5	10.998	8
		73.75	11.0672	37
		75	11.0672	37
		77.5	11.0672	28
		76.25	11.0672	17
		67.5	11.0672	8
		75	11.1364	37
		76.25	11.1364	17
		77.5	11.1364	17
		68.75	11.1364	8
		70	11.1364	8
		76.25	11.2055	17
		77.5	11.2055	17
		68.75	11.2055	8
		70	11.2055	8
		71.25	11.2055	8
		76.25	11.2747	17
		77.5	11.2747	17
		68.75	11.2747	8
		70	11.2747	8
		71.25	11.2747	8
		77.5	11.3439	17
		70	11.3439	8
		71.25	11.3439	8
		72.5	11.3439	8
		76.25	11.3439	5
		77.5	11.4131	17
		70	11.4131	8
		71.25	11.4131	8
		72.5	11.4131	8
		76.25	11.4131	5
		71.25	11.4822	8
		72.5	11.4822	8
		77.5	11.4822	5
		67.5	11.4822	3
		68.75	11.4822	3
		71.25	11.5514	8
		72.5	11.5514	8
		73.75	11.5514	8
		77.5	11.5514	5
		67.5	11.5514	3
		71.25	11.6206	8
		72.5	11.6206	8
		73.75	11.6206	8
		77.5	11.6206	5
		68.75	11.6206	3
		72.5	11.6897	8
		73.75	11.6897	8
		75	11.6897	8
		68.75	11.6897	3
		70	11.6897	3
		72.5	11.7589	8
		73.75	11.7589	8
		75	11.7589	8
		70	11.7589	3
		71.25	11.7589	3
		72.5	11.8281	8
		73.75	11.8281	8
		75	11.8281	8
		70	11.8281	3
		71.25	11.8281	3
		73.75	11.8972	8
		75	11.8972	8
		76.25	11.8972	8
		70	11.8972	3
		71.25	11.8972	3
		73.75	11.9664	8
		75	11.9664	8
		76.25	11.9664	8
		71.25	11.9664	3
		72.5	11.9664	3
		73.75	12.0356	8
		75	12.0356	8
		76.25	12.0356	8
		77.5	12.0356	8
		71.25	12.0356	3
		75	12.1047	8
		76.25	12.1047	8
		77.5	12.1047	8
		71.25	12.1047	3
		72.5	12.1047	3
		75	12.1739	8
		76.25	12.1739	8
		77.5	12.1739	8
		71.25	12.1739	3
		72.5	12.1739	3
		75	12.2431	8
		76.25	12.2431	8
		77.5	12.2431	8
		72.5	12.2431	3
		73.75	12.2431	3
		76.25	12.3123	8
		77.5	12.3123	8
		72.5	12.3123	3
		73.75	12.3123	3
		75	12.3123	3
		76.25	12.3814	8
		77.5	12.3814	8
		72.5	12.3814	3
		73.75	12.3814	3
		75	12.3814	3
		76.25	12.4506	8
		77.5	12.4506	8
		73.75	12.4506	3
		75	12.4506	3
		72.5	12.4506	1
		77.5	12.5198	8
		73.75	12.5198	3
		75	12.5198	3
		76.25	12.5198	3
		72.5	12.5198	1
		77.5	12.5889	8
		73.75	12.5889	3
		75	12.5889	3
		76.25	12.5889	3
		6.25	12.5889	0
		77.5	12.6581	8
		75	12.6581	3
		76.25	12.6581	3
		73.75	12.6581	1
		6.25	12.6581	0
		75	12.7273	3
		76.25	12.7273	3
		77.5	12.7273	3
		73.75	12.7273	1
		6.25	12.7273	0
		75	12.7965	3
		76.25	12.7965	3
		77.5	12.7965	3
		73.75	12.7965	1
		6.25	12.7965	0
		76.25	12.8656	3
		77.5	12.8656	3
		75	12.8656	1
		6.25	12.8656	0
		7.5	12.8656	0
		76.25	12.9348	3
		77.5	12.9348	3
		75	12.9348	1
		6.25	12.9348	0
		7.5	12.9348	0
		76.25	13.004	3
		77.5	13.004	3
		75	13.004	1
		6.25	13.004	0
		7.5	13.004	0
