# Supplementary material for: Mechanical instability and interfacial energy drive biofilm morphogenesis
Source: eLife. 2019 Mar 8;8:e43920. doi: 10.7554/eLife.43920 (PMC6453567; doi:10.7554/eLife.43920)
Supplement: Figure 4—source data 1. [file elife-43920-fig4-data1.xlsx]

## Sheet: Figure 4
		Figure 4A				Figure 4B							Figure 4D
Description		Data extracted using ImageJ and processed using customized Matlab code. Data are represented as (t, H, W). See Material and Methods for more details about data acquisition and legends for other details. See also main text for the depository for the code.				Data extracted using ImageJ and processed using customized Matlab code. Data are represented as (x,z) for each time point. See Material and Methods for more details about data acquisition and legends for other details. See also main text for the depository for the code.							Interfacial energies of WT biofilm. Data are represented as mean, std and # of measurements.
Condition
Computed/Measured quantity						t = 2.5h		t = 10h		t = 17.5h
		t (h)	H (μm)	W (μm)		x (mm)	z (μm)	x (mm)	z (μm)	x (mm)	z (μm)			mean (mN/m)	std (mN/m)	# of measurements
		0.333333	298.275	99.0064		0	0	0	0	0	0		biofilm-air	29.64	2.78	3
		0.666667	274.413	121.299		0.003	0.0946746	0.003	1.35686	0.003	0.0618956		biofilm-water	48.65	8.43	3
		1	258.505	117.635		0.006	0.189349	0.003	2.42353	0.006	0.123791		Γ	6.96	1.38	3
		1.33333	238.62	121.612		0.009	0.284024	0.006	2.9042	0.012	-0.895275
		1.66667	246.574	137.52		0.012	0.378698	0.009	3.1817	0.015	-1.4683
		2	230.666	121.822		0.015	0.473373	0.012	3.36684	0.018	-1.81044
		2.33333	218.735	130.927		0.018	0.568047	0.015	3.50226	0.024	-1.96637
		2.66667	214.758	138.358		0.021	0.662722	0.018	3.60784	0.027	-2.10961
		3	230.666	168.604		0.024	0.757396	0.021	3.69412	0.03	-2.20457
		3.33333	210.781	178.337		0.027	0.852071	0.024	3.76718	0.033	-2.26652
		3.66667	218.735	168.813		0.03	0.946746	0.027	4.00124	0.036	-2.41515
		4	214.758	189.64		0.033	1.04142	0.03	4.23529	0.039	-2.56378
		4.33333	194.873	172.372		0.036	1.13609	0.033	4.25882	0.042	-2.71241
		4.66667	206.804	185.872		0.039	1.23077	0.036	4.28235	0.045	-2.86104
		5	190.896	160.231		0.045	1.42012	0.039	4.09536	0.048	-3.00967
		5.33333	182.942	176.767		0.048	1.51479	0.042	3.90836	0.051	-2.94778
		5.66667	171.011	180.326		0.051	1.60947	0.045	3.72136	0.054	-2.88588
		6	178.965	213.921		0.054	1.70414	0.048	3.53437	0.057	-2.82398
		6.33333	159.08	208.165		0.057	1.79882	0.051	3.34737	0.06	-2.76209
		6.66667	178.965	219.049		0.06	1.89349	0.054	3.16037	0.063	-2.70019
		7	167.034	236.946		0.063	1.98817	0.057	2.97337	0.066	-2.6383
		7.33333	155.103	224.177		0.066	2.08284	0.06	2.78638	0.069	-2.5764
		7.66667	163.057	251.493		0.069	2.17751	0.063	2.59938	0.072	-2.51451
		8	167.034	243.539		0.072	2.27219	0.063	2.38885	0.075	-2.45261
		8.33333	147.149	230.352		0.075	2.36686	0.066	2.20186	0.078	-2.39072
		8.66667	151.126	276.716		0.078	2.46154	0.069	1.80433	0.081	-2.32882
		9	135.218	246.679		0.081	2.55621	0.072	1.40681	0.084	-2.26692
		9.33333	151.126	293.356		0.084	2.65089	0.075	1.00929	0.087	-2.20503
		9.66667	143.172	277.971		0.087	2.74556	0.078	0.611765	0.09	-2.14313
		10	123.287	325.591		0.09	2.84024	0.081	0.214241	0.093	-2.08124
		10.3333	135.218	310.939		0.093	2.93491	0.084	-0.183282	0.096	-2.01934
		10.6667	115.333	296.077		0.096	3.02959	0.087	-0.791331	0.099	-1.95745
		11	123.287	318.474		0.102	3.21893	0.09	-1.39938	0.102	-1.89555
		11.3333	119.31	376.768		0.105	3.31361	0.093	-1.7969	0.105	-1.83366
		11.6667	123.287	374.885		0.108	3.40828	0.093	-2.21796	0.108	-1.77176
		12	111.356	407.119		0.111	3.50296	0.096	-2.61548	0.111	-1.70986
		12.3333	119.31	396.967		0.114	3.59763	0.099	-3.013	0.117	-1.58607
		12.6667	115.333	410.887		0.117	3.69231	0.102	-3.41053	0.12	-1.52418
		13	127.264	411.305		0.12	3.78698	0.105	-3.80805	0.123	-1.46228
		13.3333	111.356	415.701		0.123	3.88166	0.108	-4.20557	0.126	-1.40039
		13.6667	115.333	413.503		0.126	3.97633	0.108	-4.62663	0.129	-1.33849
		14	127.264	423.865		0.129	4.07101	0.111	-5.02415	0.135	-1.2147
		14.3333	115.333	438.203		0.132	4.16568	0.114	-5.42167	0.138	-1.1528
		14.6667	119.31	451.808		0.135	4.26036	0.117	-5.8192	0.141	-1.09091
		15	123.287	446.68		0.138	4.35503	0.12	-6.00619	0.144	-1.02901
		15.3333	119.31	457.564		0.141	4.4497	0.123	-6.19319	0.147	-0.967118
		15.6667	111.356	461.123		0.144	4.54438	0.126	-6.16966	0.15	-0.905222
		16	123.287	469.705		0.147	4.63905	0.129	-6.14613	0.153	-0.843327
		16.3333	115.333	477.135		0.15	4.94425	0.132	-6.1226	0.156	-0.991958
		16.6667	111.356	483.519		0.153	5.24945	0.135	-6.09907	0.159	-1.14059
						0.156	5.55466	0.138	-5.86502	0.162	-1.28922
						0.159	5.85986	0.141	-5.63096	0.165	-1.43785
						0.162	6.16506	0.144	-5.3969	0.168	-1.58648
						0.165	6.47026	0.147	-4.95232	0.171	-1.94564
						0.168	6.98599	0.15	-4.50774	0.174	-2.30479
						0.171	7.50171	0.153	-4.06316	0.177	-2.66395
						0.174	8.01744	0.156	-3.61858	0.18	-3.02311
						0.177	8.53317	0.159	-3.17399	0.183	-3.38227
						0.18	9.25942	0.162	-2.72941	0.186	-3.74142
						0.183	9.98567	0.165	-2.28483	0.189	-4.10058
						0.186	10.7119	0.168	-1.84025	0.192	-4.45974
						0.189	11.4382	0.171	-1.39567	0.195	-5.02942
						0.192	12.375	0.171	-0.974613	0.198	-5.5991
						0.195	13.3117	0.174	-0.530031	0.201	-6.16879
						0.198	14.2485	0.177	-0.0854489	0.204	-6.73847
						0.201	15.1853	0.18	0.148607	0.207	-7.30815
						0.204	16.3326	0.183	0.382663	0.21	-7.87784
						0.204	17.1747	0.186	0.616718	0.213	-8.23699
						0.207	18.1115	0.189	0.850774	0.216	-8.59615
						0.21	19.0483	0.192	1.08483	0.219	-8.95531
						0.213	19.9851	0.195	1.31889	0.222	-9.31447
						0.216	21.1324	0.198	1.55294	0.225	-9.67362
						0.219	22.2797	0.201	1.57647	0.228	-10.0328
						0.222	23.2164	0.204	1.81053	0.231	-10.3919
						0.225	24.1532	0.207	2.04458	0.234	-10.7511
						0.225	24.9953	0.21	2.27864	0.237	-11.1103
						0.228	25.9321	0.213	2.51269	0.24	-11.4694
						0.231	26.6584	0.216	2.74675	0.243	-11.8286
						0.234	27.3846	0.219	2.9808	0.246	-12.1877
						0.237	28.1109	0.222	3.21486	0.249	-12.5469
						0.237	28.7424	0.225	3.44892	0.252	-12.6955
						0.24	29.2582	0.228	3.68297	0.255	-12.8441
						0.243	29.5634	0.231	3.91703	0.258	-12.9928
						0.246	29.8686	0.234	4.15108	0.261	-13.1414
						0.249	30.1738	0.237	4.38514	0.264	-13.29
						0.252	30.2685	0.24	4.6192	0.267	-13.4387
						0.255	30.1526	0.243	4.85325	0.27	-13.5873
						0.258	30.0367	0.246	5.08731	0.273	-13.7359
						0.261	29.9209	0.249	5.32136	0.276	-13.8846
						0.264	29.805	0.252	5.55542	0.279	-14.0332
						0.267	29.4787	0.255	5.78947	0.282	-14.1818
						0.267	28.8471	0.258	6.02353	0.285	-14.1199
						0.27	28.3102	0.261	6.04706	0.288	-14.058
						0.273	27.7733	0.264	6.07059	0.291	-13.9961
						0.276	27.2364	0.267	6.09412	0.294	-13.9342
						0.276	26.6048	0.27	6.11765	0.297	-13.8723
						0.279	25.8574	0.273	6.14118	0.303	-13.7485
						0.282	25.1099	0.276	6.16471	0.306	-13.6867
						0.285	24.3625	0.279	6.18824	0.309	-13.6248
						0.288	23.6151	0.282	6.21176	0.312	-13.5629
						0.288	22.773	0.285	6.23529	0.315	-13.501
						0.291	22.0255	0.288	6.25882	0.318	-13.4391
						0.294	21.2781	0.291	6.28235	0.321	-13.3772
						0.297	20.5307	0.294	6.30588	0.324	-13.3153
						0.3	19.7832	0.297	6.32941	0.327	-13.2534
						0.3	19.1517	0.3	6.35294	0.33	-13.1915
						0.303	18.6148	0.303	6.37647	0.333	-13.1296
						0.306	18.0779	0.306	6.4	0.339	-13.0058
						0.309	17.541	0.309	6.42353	0.342	-12.9439
						0.312	17.004	0.312	6.44706	0.345	-12.882
						0.312	16.583	0.315	6.47059	0.348	-12.8201
						0.315	16.2566	0.318	6.49412	0.351	-12.7582
						0.318	15.9302	0.321	6.51765	0.354	-12.6963
						0.321	15.6039	0.324	6.54118	0.357	-12.6344
						0.324	15.488	0.327	6.56471	0.36	-12.5725
						0.327	15.5827	0.33	6.58824	0.363	-12.5106
						0.33	15.6774	0.333	6.61176	0.366	-12.4487
						0.333	15.9826	0.336	6.63529	0.369	-12.3868
						0.336	16.4983	0.339	6.65882	0.372	-12.325
						0.339	17.014	0.342	6.68235	0.375	-12.2631
						0.342	17.7403	0.345	6.70588	0.378	-12.2012
						0.345	18.677	0.348	6.72941	0.381	-12.1393
						0.348	19.6138	0.351	6.75294	0.384	-12.0774
						0.348	20.6665	0.354	6.77647	0.387	-12.0155
						0.351	21.8138	0.357	6.8	0.39	-11.9536
						0.354	22.9611	0.36	6.82353	0.393	-11.8917
						0.357	24.3189	0.363	6.84706	0.396	-11.8298
						0.357	25.5821	0.366	6.87059	0.399	-11.7679
						0.36	26.9399	0.369	6.89412	0.402	-11.706
						0.363	28.2977	0.372	6.91765	0.405	-11.6441
						0.363	29.5609	0.375	6.94118	0.408	-11.5822
						0.366	30.9187	0.378	6.96471	0.411	-11.5203
						0.366	32.1819	0.381	6.98824	0.414	-11.4584
						0.369	33.3292	0.384	7.01176	0.417	-11.3965
						0.372	34.4765	0.387	7.03529	0.42	-11.3346
						0.372	35.5291	0.39	7.05882	0.423	-11.2727
						0.375	36.4659	0.393	7.08235	0.426	-11.2108
						0.378	36.9816	0.396	7.10588	0.429	-10.9384
						0.381	37.4974	0.399	7.12941	0.432	-10.666
						0.384	37.8026	0.402	7.15294	0.435	-10.3936
						0.387	37.8972	0.405	7.17647	0.441	-10.0592
						0.39	37.9919	0.408	7.2	0.444	-9.78683
						0.393	37.8761	0.411	7.22353	0.447	-9.5144
						0.396	37.5497	0.414	7.24706	0.45	-9.03146
						0.399	37.2233	0.417	7.27059	0.453	-8.54851
						0.402	36.4759	0.42	7.29412	0.456	-8.06556
						0.402	35.6338	0.423	7.31765	0.459	-7.58261
						0.405	34.8863	0.426	7.34118	0.462	-7.09966
						0.405	33.8337	0.429	7.36471	0.465	-6.61672
						0.408	32.8757	0.432	7.38824	0.468	-6.13377
						0.411	31.9178	0.435	7.41176	0.471	-5.65082
						0.414	30.9598	0.438	7.43529	0.474	-5.16787
						0.414	29.6967	0.441	7.45882	0.477	-4.4744
						0.417	28.5282	0.444	7.48235	0.48	-3.78092
						0.417	27.0545	0.447	7.50588	0.483	-3.08745
						0.42	25.6755	0.45	7.52941	0.486	-2.39397
						0.423	24.507	0.453	7.55294	0.489	-1.91103
						0.423	23.2438	0.456	7.57647	0.492	-1.42808
						0.426	22.2859	0.459	7.6	0.495	-0.945129
						0.429	21.1174	0.462	7.62353	0.498	-0.462181
						0.432	19.9489	0.465	7.64706	0.501	0.0207676
						0.432	18.6858	0.468	7.67059	0.504	0.503716
						0.435	17.7278	0.471	7.69412	0.507	0.776138
						0.438	16.7699	0.474	7.71765	0.51	1.04856
						0.444	15.9066	0.477	7.53065	0.513	1.53151
						0.447	14.9486	0.48	7.34365	0.516	2.01446
						0.45	13.9907	0.483	7.15666	0.519	2.4974
						0.453	13.2432	0.486	6.96966	0.522	2.98035
						0.456	12.4958	0.489	6.78266	0.525	3.4633
						0.459	11.7484	0.492	6.59567	0.528	3.94625
						0.462	10.7904	0.495	6.40867	0.531	4.4292
						0.465	10.043	0.498	6.22167	0.534	4.70162
						0.468	9.29555	0.501	6.03467	0.537	4.97404
						0.468	8.66397	0.504	5.84768	0.54	5.45699
						0.471	7.91654	0.507	5.66068	0.543	5.93994
						0.474	7.16911	0.51	5.47368	0.546	6.42289
						0.477	6.42168	0.513	5.28669	0.549	6.90583
						0.48	5.46372	0.516	5.09969	0.552	7.38878
						0.483	4.71629	0.519	4.70217	0.555	7.87173
						0.486	3.96886	0.522	4.30464	0.558	8.5652
						0.489	3.22143	0.525	3.90712	0.561	9.25868
						0.492	2.474	0.528	3.5096	0.564	9.95215
						0.495	1.72656	0.531	3.11207	0.567	10.6456
						0.498	1.18966	0.534	2.92508	0.57	11.1286
						0.501	0.652756	0.537	2.73808	0.573	11.8221
						0.504	-0.0946746	0.54	2.55108	0.576	12.5155
						0.507	-0.842105	0.543	2.36409	0.579	13.209
						0.51	-1.58954	0.546	2.17709	0.582	13.9025
						0.513	-2.33697	0.549	1.99009	0.585	14.5959
						0.516	-2.87387	0.552	1.8031	0.588	15.2894
						0.519	-3.41078	0.555	1.6161	0.591	15.9829
						0.522	-3.94768	0.558	1.4291	0.594	16.8869
						0.525	-4.48458	0.561	1.24211	0.597	17.5804
						0.528	-4.81096	0.564	1.05511	0.597	18.212
						0.531	-5.13734	0.567	0.868111	0.6	18.9054
						0.534	-5.46372	0.57	0.681115	0.603	19.8094
						0.537	-5.57957	0.573	0.494118	0.606	20.7134
						0.54	-5.69542	0.576	0.517647	0.609	21.6174
						0.543	-5.81127	0.579	0.541176	0.612	22.5214
						0.546	-5.92713	0.582	0.564706	0.615	23.4254
						0.549	-6.04298	0.585	0.588235	0.615	24.4781
						0.552	-6.15883	0.588	0.611765	0.618	25.5926
						0.555	-6.27468	0.591	0.635294	0.621	26.7071
						0.558	-6.39053	0.594	0.658824	0.624	27.6111
						0.561	-6.29586	0.597	0.682353	0.627	28.7256
						0.564	-6.20118	0.6	0.705882	0.63	29.8402
						0.567	-6.10651	0.603	0.729412	0.633	30.9547
						0.57	-5.80131	0.606	0.752941	0.636	32.2798
						0.573	-5.49611	0.609	0.776471	0.639	33.6048
						0.576	-5.19091	0.612	0.8	0.639	34.868
						0.579	-4.67518	0.615	0.823529	0.642	36.193
						0.582	-4.15945	0.618	0.847059	0.645	37.5181
						0.585	-3.4332	0.621	0.870588	0.648	39.0536
						0.588	-2.70694	0.624	0.894118	0.648	40.5273
						0.591	-1.77017	0.627	0.917647	0.651	42.0629
						0.594	-0.833385	0.63	0.941176	0.654	43.5985
						0.594	0.219246	0.636	0.988235	0.654	45.2827
						0.597	1.36655	0.639	1.01176	0.657	47.0288
						0.6	2.72438	0.642	1.03529	0.66	48.7749
						0.603	4.29274	0.645	1.05882	0.66	50.4591
						0.606	5.8611	0.648	1.08235	0.663	52.2052
						0.609	7.63999	0.651	1.10588	0.666	54.1619
						0.612	9.41887	0.654	1.12941	0.669	56.1185
						0.615	11.1978	0.657	1.15294	0.669	58.0132
						0.618	13.1872	0.66	1.17647	0.672	59.9699
						0.618	15.0819	0.663	1.41053	0.675	62.137
						0.621	17.0713	0.666	1.64458	0.675	64.2423
						0.624	19.0607	0.669	1.87864	0.678	66.62
						0.627	21.2607	0.672	2.11269	0.678	68.9358
						0.63	23.2501	0.675	2.34675	0.681	71.3134
						0.63	25.3553	0.678	2.5808	0.681	73.6292
						0.633	27.3448	0.681	2.81486	0.684	76.0069
						0.636	29.5447	0.684	3.04892	0.684	78.3227
						0.639	31.5341	0.687	3.28297	0.687	80.7004
						0.642	33.734	0.69	3.51703	0.687	83.2267
						0.645	35.7235	0.693	3.75108	0.69	85.6044
						0.648	37.9234	0.696	4.19567	0.69	87.9202
						0.648	39.8181	0.699	4.64025	0.693	90.2979
						0.651	41.8075	0.702	5.08483	0.693	92.6137
						0.654	43.7969	0.705	5.52941	0.696	95.2019
						0.657	45.7864	0.708	5.97399	0.696	97.7282
						0.657	47.6811	0.711	6.41858	0.699	100.316
						0.66	49.881	0.714	6.86316	0.699	102.843
						0.663	52.081	0.717	7.30774	0.699	105.58
						0.666	54.4914	0.72	7.5418	0.702	108.378
						0.666	56.8072	0.72	7.96285	0.702	111.115
						0.669	59.2177	0.723	8.40743	0.705	113.914
						0.669	61.5335	0.726	8.85201	0.705	116.651
						0.672	63.9439	0.729	9.29659	0.708	119.449
						0.672	66.2597	0.732	9.9517	0.708	122.397
						0.675	68.6702	0.735	10.6068	0.711	125.196
						0.678	71.0807	0.738	11.2619	0.711	128.143
						0.681	73.4911	0.741	11.917	0.711	131.09
						0.684	75.9016	0.744	12.7827	0.714	134.1
						0.684	78.2174	0.744	13.6248	0.714	137.257
						0.687	80.6278	0.747	14.2799	0.714	140.205
						0.687	83.1542	0.75	15.1455	0.717	143.425
						0.69	85.7751	0.753	16.0111	0.717	146.583
						0.69	88.512	0.753	16.8533	0.717	149.74
						0.693	91.3435	0.756	17.7189	0.72	152.96
						0.693	94.2909	0.759	18.795	0.72	156.329
						0.696	97.1224	0.762	19.8712	0.72	159.697
						0.696	99.8592	0.762	21.1344	0.723	163.127
						0.699	102.48	0.765	22.4211	0.723	166.496
						0.699	105.007	0.768	23.7077	0.726	169.926
						0.702	107.628	0.771	24.9944	0.726	173.295
						0.705	110.249	0.774	26.2811	0.726	176.873
						0.705	112.775	0.777	27.7783	0.726	180.452
						0.708	115.396	0.78	29.2755	0.726	184.031
						0.708	117.922	0.78	30.9598	0.726	187.821
						0.711	120.333	0.783	32.6675	0.726	191.61
						0.711	122.859	0.783	34.5622	0.726	195.4
						0.714	125.269	0.786	36.4805	0.726	199.189
						0.714	127.796	0.786	38.3752	0.726	202.979
						0.717	130.206	0.789	40.504	0.729	207.041
						0.717	132.522	0.792	42.6328	0.729	211.041
						0.72	134.722	0.792	44.7381	0.729	215.041
						0.72	136.617	0.795	47.0774	0.729	219.041
						0.723	138.606	0.795	49.6037	0.729	223.041
						0.726	140.385	0.798	51.943	0.729	227.041
						0.726	142.069	0.798	54.4693	0.729	231.041
						0.729	143.637	0.798	56.9957	0.729	235.041
						0.729	145.111	0.801	59.756	0.729	239.041
						0.732	146.469	0.801	62.2824	0.729	243.041
						0.732	147.732	0.801	65.0192	0.729	247.041
						0.735	148.879	0.804	67.9901	0.729	251.041
						0.738	150.027	0.804	70.9375	0.729	255.041
						0.741	150.964	0.804	73.6743	0.729	259.041
						0.744	151.9	0.807	76.4347	0.729	263.041
						0.747	152.837	0.807	79.382	0.729	267.041
						0.75	153.563	0.807	82.3294	0.729	271.041
						0.753	154.29	0.807	85.2768	0.729	275.041
						0.756	154.805	0.81	88.4582	0.729	278.83
						0.759	155.321	0.81	91.6161	0.729	282.62
						0.762	155.416	0.81	94.774	0.729	286.409
						0.765	155.51	0.81	98.1424	0.729	290.199
						0.768	155.605	0.813	101.534	0.729	293.777
						0.771	155.279	0.813	104.903	0.729	297.356
						0.774	154.952	0.813	108.482	0.729	300.935
						0.777	154.626	0.813	112.061	0.729	304.514
						0.78	154.3	0.813	115.64	0.729	308.093
						0.783	153.763	0.813	119.219	0.726	311.61
						0.786	153.226	0.813	123.008	0.726	314.979
						0.786	152.594	0.813	126.798	0.726	318.347
						0.789	151.847	0.813	130.587	0.726	321.716
						0.792	151.099	0.813	134.376	0.723	325.022
						0.792	150.047	0.813	138.376	0.723	328.18
						0.795	149.089	0.813	142.376	0.723	331.338
						0.798	147.92	0.813	146.376	0.72	334.434
						0.801	146.752	0.813	150.376	0.72	337.381
						0.801	145.278	0.813	154.376	0.72	340.329
						0.804	143.899	0.813	158.376	0.717	343.425
						0.807	142.31	0.813	162.376	0.717	346.583
						0.807	140.625	0.813	166.376	0.717	349.74
						0.81	138.825	0.813	170.376	0.717	352.688
						0.81	136.931	0.813	174.376	0.714	355.784
						0.813	135.13	0.813	178.166	0.714	358.942
						0.813	133.236	0.813	181.955	0.714	362.1
						0.816	131.225	0.813	185.745	0.711	365.196
						0.816	129.12	0.813	189.534	0.711	368.353
						0.819	127.109	0.813	193.324	0.711	371.511
						0.819	125.004	0.813	197.113	0.711	374.88
						0.822	122.783	0.813	200.903	0.711	378.248
						0.822	120.467	0.813	204.482	0.708	381.555
						0.825	118.036	0.813	208.061	0.708	384.923
						0.825	115.509	0.816	211.663	0.708	388.502
						0.828	113.078	0.816	215.032	0.708	392.081
						0.828	110.551	0.816	218.4	0.708	395.66
						0.831	108.12	0.816	221.768	0.708	399.239
						0.831	105.593	0.816	225.137	0.708	402.818
						0.834	102.951	0.816	228.505	0.708	406.397
						0.834	100.214	0.816	231.663	0.708	409.765
						0.837	97.5721	0.819	234.845	0.708	413.134
						0.84	95.1405	0.819	238.002	0.708	416.713
						0.84	92.4036	0.819	240.95	0.708	420.292
						0.843	89.7614	0.822	244.131	0.708	423.871
						0.843	86.8141	0.822	247.079	0.708	427.449
						0.846	83.9614	0.822	249.815	0.711	430.88
						0.846	81.014	0.825	252.365	0.711	434.248
						0.846	78.0666	0.825	254.681	0.711	437.406
						0.849	75.214	0.828	256.81	0.714	440.626
						0.849	72.2666	0.828	258.494	0.714	443.573
						0.852	69.6244	0.828	260.178	0.714	446.31
						0.852	66.8876	0.831	261.465	0.714	448.836
						0.855	64.4559	0.831	262.518	0.714	451.152
						0.855	61.7191	0.834	263.594	0.714	453.257
						0.858	59.2874	0.837	264.249	0.717	455.214
						0.861	56.6453	0.84	264.693	0.717	457.109
						0.861	54.119	0.843	264.717	0.72	458.644
						0.864	51.6873	0.846	264.53	0.72	459.908
						0.864	49.3715	0.846	264.109	0.723	461.022
						0.867	47.1504	0.849	263.501	0.726	461.926
						0.867	44.8346	0.849	262.448	0.729	462.409
						0.87	42.824	0.852	261.209	0.732	462.681
						0.87	40.7188	0.855	259.759	0.735	462.533
						0.873	38.9187	0.855	258.074	0.738	462.174
						0.873	37.024	0.858	256.203	0.741	461.815
						0.876	35.2239	0.858	254.308	0.744	461.034
						0.876	33.5397	0.861	252.227	0.747	460.044
						0.879	31.7396	0.864	250.145	0.747	458.78
						0.879	30.0554	0.867	248.063	0.75	457.579
						0.882	28.2554	0.87	245.771	0.75	456.105
						0.885	26.6658	0.873	243.689	0.753	454.694
						0.885	24.9816	0.876	241.397	0.753	453.009
						0.888	23.6026	0.876	239.081	0.756	451.387
						0.888	21.9184	0.876	236.765	0.759	449.554
						0.891	20.5394	0.879	234.473	0.759	447.66
						0.894	18.9499	0.879	232.157	0.759	445.765
						0.894	17.4762	0.882	229.654	0.762	443.721
						0.897	16.0972	0.882	227.339	0.765	441.889
						0.897	14.6235	0.882	224.812	0.765	439.783
						0.9	13.2445	0.885	222.52	0.768	437.951
						0.903	11.6549	0.885	220.204	0.768	435.845
						0.906	10.2759	0.888	217.702	0.771	434.012
						0.906	8.80224	0.888	215.386	0.771	431.907
						0.909	7.42323	0.891	213.093	0.774	429.653
						0.912	6.04422	0.891	210.778	0.774	427.337
						0.915	4.66521	0.891	208.462	0.774	425.022
						0.918	3.49673	0.894	205.959	0.777	422.557
						0.921	2.32825	0.894	203.433	0.777	420.031
						0.924	1.37029	0.897	201.141	0.78	417.567
						0.924	0.317658	0.897	198.614	0.78	415.04
						0.927	-0.640299	0.897	196.088	0.783	412.576
						0.93	-1.59826	0.9	193.585	0.783	409.839
						0.933	-2.34569	0.9	191.059	0.786	407.164
						0.936	-3.09312	0.903	188.346	0.789	404.489
						0.939	-3.63002	0.903	185.819	0.789	401.752
						0.942	-3.9564	0.906	183.316	0.789	399.015
						0.945	-4.28278	0.906	180.79	0.792	396.13
						0.948	-4.39863	0.909	178.287	0.792	393.183
						0.951	-4.30396	0.909	175.55	0.795	390.087
						0.954	-3.99875	0.909	172.814	0.795	387.139
						0.957	-3.69355	0.912	170.311	0.795	383.981
						0.96	-3.17783	0.912	167.574	0.795	380.823
						0.963	-2.45157	0.912	164.837	0.798	377.727
						0.966	-1.72532	0.915	162.124	0.798	374.569
						0.969	-0.788539	0.915	159.387	0.798	371.412
						0.972	0.14824	0.918	156.674	0.801	368.316
						0.975	1.08502	0.918	154.147	0.801	364.947
						0.978	2.23233	0.918	151.411	0.801	361.789
						0.981	3.37963	0.918	148.674	0.804	358.483
						0.984	4.52694	0.921	145.96	0.804	355.114
						0.984	5.7901	0.921	143.013	0.804	351.746
						0.987	7.14793	0.921	140.276	0.804	348.377
						0.99	8.50576	0.924	137.563	0.804	345.009
						0.99	9.97945	0.924	134.615	0.807	341.703
						0.993	11.3373	0.924	131.879	0.807	338.334
						0.996	12.6951	0.927	128.955	0.807	334.966
						0.996	14.1688	0.927	126.007	0.81	331.659
						0.999	15.5266	0.927	123.06	0.81	328.501
						1.002	17.095	0.927	120.113	0.81	325.133
						1.002	18.5687	0.927	116.955	0.81	321.764
						1.005	19.9265	0.93	113.82	0.81	318.396
						1.008	21.4949	0.93	110.873	0.813	315.3
						1.008	23.1791	0.93	107.715	0.813	312.142
						1.011	24.958	0.933	104.581	0.813	308.984
						1.014	26.7368	0.933	101.633	0.813	305.826
						1.014	28.6316	0.933	98.4755	0.813	302.668
						1.017	30.4105	0.933	95.3176	0.816	299.572
						1.02	32.1893	0.936	92.3938	0.816	296.415
						1.023	34.1788	0.936	89.4464	0.816	293.257
						1.026	35.9576	0.936	86.4991	0.816	290.099
						1.029	37.7365	0.939	83.3647	0.819	287.003
						1.032	39.5154	0.939	80.4173	0.819	283.634
						1.035	41.2943	0.939	77.47	0.819	280.266
						1.038	43.0732	0.942	74.5461	0.819	276.897
						1.041	44.8521	0.942	71.5988	0.819	273.74
						1.044	46.4204	0.942	68.6514	0.822	270.644
						1.047	48.1993	0.945	65.7276	0.822	267.275
						1.047	49.673	0.945	62.9907	0.822	263.907
						1.05	51.2414	0.948	60.2774	0.825	260.6
						1.053	52.8097	0.948	57.7511	0.825	257.232
						1.056	54.1675	0.951	55.2483	0.825	253.653
						1.056	55.4307	0.951	52.722	0.825	250.074
						1.059	56.578	0.954	50.4297	0.825	246.495
						1.062	57.7253	0.954	47.9034	0.828	242.978
						1.065	58.6621	0.957	45.6111	0.828	239.399
						1.068	59.5989	0.957	43.2954	0.828	235.609
						1.071	60.5357	0.96	41.0031	0.831	231.882
						1.074	61.2619	0.96	38.6873	0.831	228.092
						1.077	62.1987	0.963	36.6056	0.831	224.303
						1.08	63.1355	0.966	34.7344	0.831	220.513
						1.08	63.9776	0.966	32.8396	0.834	216.996
						1.083	64.7038	0.969	30.9684	0.834	213.417
						1.086	65.4301	0.969	29.0737	0.834	209.839
						1.089	66.1563	0.972	27.413	0.834	206.049
						1.092	66.8826	0.975	25.7523	0.834	202.26
						1.095	67.3983	0.978	24.3022	0.837	198.532
						1.098	67.914	0.981	22.852	0.837	194.953
						1.098	68.3351	0.984	21.6124	0.837	191.374
						1.101	68.8508	0.987	20.1622	0.837	187.795
						1.104	69.3666	0.99	18.7121	0.84	184.278
						1.107	69.6718	0.993	17.4724	0.84	180.91
						1.11	69.977	0.996	16.2328	0.84	177.541
						1.113	70.2822	0.999	15.2037	0.84	174.173
						1.116	70.5874	0.999	13.9406	0.84	170.804
						1.119	70.8926	1.002	12.9115	0.84	167.436
						1.122	71.1978	1.005	11.8824	0.843	164.129
						1.125	71.2924	1.008	11.0638	0.843	160.761
						1.128	71.1766	1.008	10.2217	0.843	157.393
						1.131	71.0607	1.011	9.19257	0.843	154.024
						1.134	70.9449	1.014	8.16347	0.846	150.507
						1.137	70.6185	1.017	7.34489	0.846	146.928
						1.14	70.2921	1.02	6.52632	0.846	143.349
						1.143	69.9657	1.02	5.68421	0.849	139.832
						1.146	69.4288	1.023	5.07616	0.849	136.464
						1.149	68.8919	1.026	4.46811	0.849	133.095
						1.149	68.2604	1.029	3.86006	0.852	129.578
						1.152	67.7235	1.032	3.25201	0.852	125.999
						1.155	66.976	1.032	2.83096	0.852	122.42
						1.158	66.2286	1.035	2.43344	0.855	119.114
						1.161	65.4812	1.038	2.03591	0.855	115.535
						1.164	64.5232	1.041	1.42786	0.855	111.956
						1.167	63.5652	1.044	0.819814	0.855	108.377
						1.167	62.5126	1.047	0.422291	0.858	105.071
						1.17	61.5547	1.05	0.0247678	0.858	101.702
						1.173	60.3862	1.053	-0.372755	0.858	98.3337
						1.176	59.4282	1.056	-0.770279	0.858	95.1758
						1.179	58.4703	1.059	-1.1678	0.858	92.0179
						1.182	57.3018	1.062	-1.3548	0.861	88.9219
						1.185	56.1333	1.065	-1.5418	0.861	85.9745
						1.185	55.0807	1.068	-1.72879	0.861	83.0272
						1.188	54.1227	1.071	-1.91579	0.861	80.0798
						1.191	52.9542	1.074	-2.10279	0.864	77.1943
						1.194	51.9963	1.077	-2.28978	0.864	74.247
						1.194	50.9436	1.08	-2.47678	0.864	71.2996
						1.197	49.7751	1.083	-2.66378	0.867	68.4141
						1.2	48.6067	1.086	-2.85077	0.867	65.6773
						1.2	47.554	1.089	-3.03777	0.867	62.9404
						1.203	46.3855	1.092	-3.22477	0.87	60.055
						1.206	45.2171	1.095	-3.41176	0.87	57.3181
						1.209	44.0486	1.098	-3.38824	0.873	54.6432
						1.209	42.7854	1.101	-3.36471	0.873	52.1169
						1.212	41.4064	1.104	-3.34118	0.876	49.6524
						1.215	40.0274	1.107	-3.31765	0.876	47.1261
						1.215	38.5537	1.11	-3.29412	0.876	44.8103
						1.218	37.1747	1.113	-3.27059	0.879	42.5564
						1.221	35.7957	1.116	-3.24706	0.879	40.2407
						1.221	34.322	1.119	-3.22353	0.882	38.1973
						1.224	32.943	1.122	-3.2	0.885	36.1539
						1.227	31.564	1.125	-3.17647	0.888	34.3211
						1.23	30.185	1.128	-3.15294	0.891	32.4882
						1.233	28.806	1.131	-3.12941	0.894	30.8659
						1.236	27.427	1.134	-3.10588	0.894	29.1817
						1.236	25.9533	1.137	-3.08235	0.897	27.5594
						1.239	24.5743	1.14	-3.05882	0.9	26.1476
						1.242	23.1953	1.143	-3.03529	0.903	24.7358
						1.242	21.7216	1.146	-3.01176	0.906	23.5346
						1.245	20.5531	1.149	-2.98824	0.909	22.5438
						1.248	19.3846	1.152	-2.96471	0.912	21.5531
						1.251	18.2161	1.155	-2.94118	0.915	20.5624
						1.254	17.0476	1.158	-2.91765	0.918	19.5716
						1.257	16.0897	1.161	-2.89412	0.921	18.5809
						1.26	15.1317	1.164	-2.87059	0.921	17.7388
						1.26	14.0791	1.167	-2.84706	0.924	16.9586
						1.263	13.1211	1.17	-2.82353	0.927	15.9678
						1.266	12.1632	1.173	-2.8	0.93	15.1876
						1.269	11.4158	1.176	-2.77647	0.933	14.4074
						1.272	10.6683	1.179	-2.75294	0.936	13.6272
						1.272	9.82622	1.182	-2.72941	0.936	12.7851
						1.275	9.07879	1.185	-2.70588	0.939	12.2154
						1.278	8.54189	1.188	-2.68235	0.942	11.6457
						1.281	7.79446	1.191	-2.65882	0.945	11.076
						1.281	6.95235	1.194	-2.63529	0.948	10.7169
						1.284	6.41545	1.197	-2.61176	0.948	10.2958
						1.287	5.87854	1.2	-2.58824	0.951	9.93668
						1.29	5.34164	1.203	-2.56471	0.954	9.57752
						1.293	4.80473	1.206	-2.54118	0.957	9.21837
						1.296	4.26783	1.209	-2.51765	0.96	8.85921
						1.299	3.94145	1.212	-2.49412	0.963	8.71058
						1.302	3.61507	1.215	-2.47059	0.966	8.56195
						1.302	3.19402	1.218	-2.44706	0.969	8.41332
						1.305	2.86764	1.221	-2.42353	0.972	8.26468
						1.308	2.75179	1.224	-2.4	0.975	8.11605
						1.311	2.63594	1.227	-2.37647	0.978	8.17795
						1.314	2.52009	1.23	-2.35294	0.981	8.23985
						1.317	2.40424	1.233	-2.32941	0.984	8.30174
						1.32	2.28838	1.236	-2.30588	0.987	8.36364
						1.323	2.17253	1.239	-2.28235	0.99	8.42553
						1.326	2.05668	1.242	-2.25882	0.993	8.48743
						1.329	1.94083	1.245	-2.23529	0.996	8.54932
						1.332	2.0355	1.248	-2.21176	0.999	8.61122
						1.335	2.13018	1.251	-2.18824	1.002	8.67311
						1.338	2.22485	1.254	-2.37523	1.005	8.73501
						1.341	2.31953	1.257	-2.56223	1.008	8.79691
						1.344	2.4142	1.26	-2.74923	1.011	8.8588
						1.347	2.29835	1.263	-2.93622	1.014	8.9207
						1.35	2.1825	1.266	-3.12322	1.017	8.98259
						1.353	2.06665	1.269	-3.31022	1.02	9.04449
						1.356	1.95079	1.272	-3.49721	1.023	9.10638
						1.359	1.83494	1.275	-3.68421	1.026	9.16828
						1.362	1.71909	1.278	-3.87121	1.029	9.23017
						1.365	1.60324	1.281	-4.0582	1.032	9.29207
						1.368	1.48739	1.284	-4.45573	1.035	9.35397
						1.371	1.37154	1.287	-4.85325	1.038	9.41586
						1.371	1.16101	1.29	-5.25077	1.041	9.26723
						1.374	0.834631	1.293	-5.6483	1.044	9.1186
						1.377	0.508253	1.296	-6.04582	1.047	8.96997
						1.38	0.181875	1.299	-6.44334	1.05	8.82134
						1.383	-0.144503	1.302	-6.84087	1.053	8.67271
						1.386	-0.470881	1.305	-7.23839	1.056	8.52408
						1.389	-0.797259	1.308	-7.63591	1.059	8.37545
						1.392	-1.12364	1.311	-7.82291	1.062	8.22681
						1.395	-1.66054	1.314	-8.00991	1.065	8.07818
						1.398	-2.19745	1.317	-8.1969	1.065	7.86766
						1.401	-2.52382	1.32	-8.3839	1.068	7.71903
						1.404	-2.8502	1.323	-8.5709	1.071	7.35987
						1.407	-3.17658	1.326	-8.75789	1.074	7.00071
						1.41	-3.50296	1.329	-8.94489	1.077	6.64156
						1.413	-3.82934	1.332	-9.13189	1.08	6.2824
						1.416	-4.15571	1.335	-9.31889	1.083	5.92324
						1.419	-4.48209	1.341	-9.48235	1.086	5.56408
						1.422	-4.80847	1.344	-9.45882	1.089	5.20493
						1.425	-5.13485	1.347	-9.22477	1.092	4.84577
						1.428	-5.46123	1.35	-8.99071	1.095	4.69714
						1.431	-5.57708	1.353	-8.75666	1.095	4.48661
						1.434	-5.69293	1.356	-8.5226	1.098	4.33798
						1.437	-5.80878	1.359	-8.28854	1.101	3.97883
						1.44	-5.92463	1.362	-8.05449	1.104	3.61967
						1.443	-6.04049	1.365	-7.82043	1.107	3.26051
						1.446	-6.15634	1.368	-7.58638	1.11	2.90135
						1.449	-6.27219	1.371	-7.35232	1.113	2.5422
						1.452	-5.96699	1.374	-7.11827	1.116	1.97251
						1.455	-5.66179	1.377	-6.67368	1.119	1.40283
						1.458	-5.35659	1.38	-6.2291	1.122	0.833147
						1.461	-5.05139	1.383	-5.78452	1.125	0.47399
						1.464	-4.74618	1.386	-5.33994	1.125	0.052937
						1.467	-4.44098	1.389	-4.89536	1.128	-0.30622
						1.47	-4.13578	1.392	-4.45077	1.131	-0.665377
						1.473	-3.83058	1.395	-4.00619	1.134	-1.02453
						1.476	-3.52538	1.398	-3.56161	1.137	-1.38369
						1.476	-3.31486	1.401	-3.11703	1.137	-1.80474
						1.479	-3.00965	1.404	-2.88297	1.14	-2.1639
						1.482	-2.70445	1.407	-2.64892	1.143	-2.52306
						1.485	-2.39925	1.41	-2.41486	1.146	-2.88222
						1.488	-2.09405	1.413	-2.1808	1.149	-3.24137
						1.491	-1.78885	1.416	-1.94675	1.152	-3.39
						1.494	-1.48365	1.419	-1.71269	1.155	-3.74916
						1.497	-0.992691	1.422	-1.47864	1.158	-4.10832
						1.5	-0.662722	1.425	-1.24458	1.161	-4.46747
						1.503	-0.568047	1.428	-1.01053	1.164	-4.82663
						1.506	-0.473373	1.431	-0.776471	1.167	-4.97526
						1.509	-0.378698	1.434	-0.752941	1.17	-5.12389
						1.512	-0.284024	1.437	-0.729412	1.173	-5.27252
						1.515	-0.189349	1.44	-0.705882	1.176	-5.42115
						1.518	-0.0946746	1.443	-0.682353	1.179	-5.78031
						1.521	0	1.446	-0.658824	1.179	-6.20136
								1.449	-0.635294	1.182	-6.56052
								1.452	-0.611765	1.185	-6.91968
								1.455	-0.588235	1.188	-7.27884
								1.458	-0.564706	1.191	-7.63799
								1.461	-0.541176	1.194	-7.99715
								1.464	-0.517647	1.197	-8.35631
								1.467	-0.494118	1.2	-8.71546
								1.47	-0.470588	1.2	-9.13652
								1.473	-0.447059	1.203	-9.49567
								1.476	-0.423529	1.206	-9.6443
								1.479	-0.4	1.209	-9.79293
								1.482	-0.376471	1.212	-9.94157
								1.485	-0.352941	1.215	-10.0902
								1.488	-0.329412	1.218	-10.2388
								1.491	-0.305882	1.221	-10.3875
								1.494	-0.282353	1.224	-10.5361
								1.497	-0.258824	1.227	-10.6847
								1.5	-0.235294	1.23	-10.8334
								1.503	-0.211765	1.233	-10.982
								1.506	-0.188235	1.236	-11.1306
								1.509	-0.164706	1.239	-11.2792
								1.512	-0.141176	1.242	-11.4279
								1.515	-0.117647	1.245	-11.5765
								1.518	-0.0941176	1.248	-11.7251
								1.521	-0.0705882	1.251	-11.8738
								1.524	-0.0470588	1.254	-12.0224
								1.527	-0.0235294	1.257	-12.171
								1.53	0	1.26	-12.3197
										1.263	-12.4683
										1.266	-12.6169
										1.269	-12.7656
										1.272	-12.9142
										1.275	-13.0628
										1.278	-13.2114
										1.281	-13.3601
										1.284	-13.7192
										1.287	-13.8679
										1.29	-14.0165
										1.293	-14.1651
										1.296	-14.3138
										1.299	-14.4624
										1.302	-14.611
										1.305	-14.7596
										1.308	-14.9083
										1.308	-15.1188
										1.311	-15.2674
										1.314	-15.4161
										1.317	-15.5647
										1.32	-15.7133
										1.323	-15.862
										1.326	-16.0106
										1.329	-16.1592
										1.332	-16.3078
										1.335	-16.4565
										1.338	-16.3946
										1.341	-16.3327
										1.344	-16.0603
										1.347	-15.7878
										1.35	-15.5154
										1.353	-15.243
										1.356	-14.9706
										1.359	-14.6982
										1.362	-14.4257
										1.365	-13.9428
										1.368	-13.4598
										1.368	-13.0388
										1.371	-12.5558
										1.374	-12.0729
										1.377	-11.5899
										1.38	-11.107
										1.383	-10.4135
										1.386	-9.72004
										1.386	-9.08847
										1.389	-8.39499
										1.392	-7.70152
										1.395	-7.21857
										1.398	-6.94615
										1.401	-6.67372
										1.404	-6.4013
										1.404	-6.19078
										1.407	-5.91835
										1.41	-5.64593
										1.413	-5.58404
										1.416	-5.52214
										1.419	-5.46025
										1.422	-5.39835
										1.425	-5.33646
										1.428	-5.27456
										1.431	-5.21266
										1.434	-5.36129
										1.437	-5.50993
										1.44	-5.65856
										1.443	-5.80719
										1.446	-5.95582
										1.449	-6.10445
										1.452	-6.04255
										1.455	-5.98066
										1.458	-5.91876
										1.461	-5.85687
										1.464	-5.79497
										1.467	-5.73308
										1.47	-5.67118
										1.473	-5.39876
										1.476	-5.12634
										1.479	-4.85391
										1.482	-4.58149
										1.485	-4.30907
										1.488	-4.03665
										1.491	-3.76423
										1.494	-3.4918
										1.497	-3.21938
										1.5	-2.94696
										1.503	-2.67454
										1.506	-2.40212
										1.509	-2.1297
										1.512	-1.85727
										1.515	-1.44863
										1.518	-0.947518
										1.521	-0.618956
										1.524	-0.55706
										1.53	-0.433269
										1.536	-0.309478
										1.539	-0.247582
										1.545	-0.123791
										1.551	0
