# Supplementary material for: Mechanical instability and interfacial energy drive biofilm morphogenesis
Source: eLife. 2019 Mar 8;8:e43920. doi: 10.7554/eLife.43920 (PMC6453567; doi:10.7554/eLife.43920)
Supplement: Figure 5—figure supplement 1—source data 1. [file elife-43920-fig5-figsupp1-data1.xlsx]

## Sheet: Figure 5 - figure supplement 1
		Figure 5 - figure supplement 1
Description		Line profile data extracted using optical profiling. Data are represented as (x, z).
Condition
Computed/Measured quantity		WT		Δ BC
		x (mm)	z (μm)	x (mm)	z (μm)
		0	76.4	0	48.1
		0.0051	76.6	0.01857	47.96
		0.0168	77.5	0.04211	48.07
		0.0286	78.9	0.06565	48.52
		0.0404	80.8	0.08919	49.18
		0.0521	83.3	0.11273	49.98
		0.0639	86.3	0.13627	50.75
		0.0757	89.6	0.15982	51.37
		0.0875	93.1	0.18336	51.7
		0.0992	96.3	0.2069	51.67
		0.111	99.5	0.23044	51.32
		0.1228	102.7	0.25398	50.73
		0.1345	105.7	0.27752	49.99
		0.1463	108.6	0.30106	49.27
		0.1581	111.2	0.3246	48.67
		0.1699	113.3	0.34814	48.25
		0.1816	115	0.37169	48.04
		0.1934	116	0.39523	48.04
		0.2052	116.4	0.41877	48.23
		0.2169	116.4	0.44231	48.48
		0.2287	116	0.46585	48.66
		0.2405	115.2	0.48939	48.74
		0.2522	114	0.51293	48.69
		0.264	112.4	0.53647	48.49
		0.2758	110.7	0.56001	48.13
		0.2876	109.4	0.58356	47.6
		0.2993	108.8	0.6071	46.96
		0.3111	109.5	0.63064	46.34
		0.3229	111.5	0.65418	45.74
		0.3346	113.8	0.67772	45.27
		0.3464	115.5	0.70126	45.02
		0.3582	117	0.7248	45.05
		0.37	118.3	0.74834	45.32
		0.3817	118.9	0.77188	45.65
		0.3935	119	0.79542	45.95
		0.4053	116.5	0.81897	46.23
		0.417	105.2	0.84251	46.59
		0.4288	88.4	0.86605	47.33
		0.4406	80.5	0.88959	49.05
		0.4523	80	0.91313	52.63
		0.4641	79.8	0.93667	58.05
		0.4759	79.1	0.96021	64.43
		0.4877	80	0.98375	70.25
		0.4994	81.4	1.00729	74.5
		0.5112	82.8	1.03084	76.92
		0.523	83.9	1.05438	76.61
		0.5347	85	1.07792	74.39
		0.5465	86.1	1.10146	72.42
		0.5583	87.5	1.125	72.4
		0.5701	89	1.14854	74.65
		0.5818	90.9	1.17208	78.54
		0.5936	93.1	1.19562	83.31
		0.6054	95.5	1.21916	88
		0.6171	98	1.24271	92.21
		0.6289	100.3	1.26625	95.95
		0.6407	102.6	1.28979	99.42
		0.6524	104.4	1.31333	102.81
		0.6642	105.7	1.33687	105.94
		0.676	106.6	1.36041	108.74
		0.6878	106.9	1.38395	111.49
		0.6995	106.5	1.40749	114.52
		0.7113	105.8	1.43103	117.91
		0.7231	104.6	1.45457	120.91
		0.7348	103	1.47812	122.79
		0.7466	101	1.50166	123.24
		0.7584	98.6	1.5252	121.88
		0.7702	95.7	1.54874	118.67
		0.7819	92.3	1.57228	114.45
		0.7937	88.6	1.59582	110.15
		0.8055	84.8	1.61936	106.68
		0.8172	81	1.6429	104.93
		0.829	77.4	1.66644	104.4
		0.8408	74.4	1.68999	104.86
		0.8525	71.7	1.71353	105.86
		0.8643	69.3	1.73707	106.83
		0.8761	66.9	1.76061	107.43
		0.8879	65	1.78415	107.63
		0.8996	63.6	1.80769	107.16
		0.9114	62.7	1.83123	106.02
		0.9232	62.6	1.85477	103.9
		0.9349	63.4	1.87831	101.35
		0.9467	65.2	1.90186	98.57
		0.9585	68	1.9254	96.15
		0.9702	71.2	1.94894	94.75
		0.982	74.9	1.97248	94.77
		0.9938	78.8	1.99602	96.02
		1.0056	82.8	2.01956	98.08
		1.0173	87.3	2.0431	100.29
		1.0291	92.2	2.06664	102.47
		1.0409	98.2	2.09018	104.27
		1.0526	106.5	2.11372	105.67
		1.0644	120.1	2.13727	106.08
		1.0762	140.4	2.16081	104.98
		1.088	165.5	2.18435	101.98
		1.0997	192.9	2.20789	97.94
		1.1115	218.9	2.23143	94.4
		1.1233	240.4	2.25497	91.59
		1.135	255	2.27851	89.67
		1.1468	263.3	2.30205	88.17
		1.1586	267.5	2.32559	87.08
		1.1703	269.7	2.34914	85.74
		1.1821	270	2.37268	83.71
		1.1939	268.5	2.39622	81.51
		1.2057	265.1	2.41976	79.38
		1.2174	258	2.4433	77.77
		1.2292	242.2	2.46684	76.8
		1.241	215.4	2.49038	76.23
		1.2527	179.7	2.51392	76.01
		1.2645	139.8	2.53746	75.62
		1.2763	102.8	2.56101	74.89
		1.2881	74	2.58455	72.78
		1.2998	59	2.60809	69.6
		1.3116	55.5	2.63163	65.57
		1.3234	58.5	2.65517	61.68
		1.3351	64.4	2.67871	58.62
		1.3469	70.3	2.70225	57.26
		1.3587	75.1	2.72579	57.04
		1.3704	78.4	2.74933	58.24
		1.3822	80.5	2.77287	60.21
		1.394	82	2.79642	61.86
		1.4058	84	2.81996	62.13
		1.4175	87.2	2.8435	60.73
		1.4293	91.3	2.86704	57.84
		1.4411	94.7	2.89058	54.84
		1.4528	97.7	2.91412	52.52
		1.4646	99.9	2.93766	52.81
		1.4764	101.8	2.9612	54.32
		1.4882	103.5	2.98474	56.57
		1.4999	105.4	3.00829	57.26
		1.5117	106.9	3.03183	56.38
		1.5235	108.1	3.05537	54.07
		1.5352	108.9	3.07891	52.13
		1.547	109.3	3.10245	51.33
		1.5588	109.3	3.12599	51.8
		1.5705	108.6	3.14953	52.77
		1.5823	107.2	3.17307	54.13
		1.5941	105.2	3.19661	55.96
		1.6059	102.5	3.22015	58.22
		1.6176	99.2	3.2437	61.35
		1.6294	95	3.26724	65.52
		1.6412	90.3	3.29078	70.51
		1.6529	85.4	3.31432	75.78
		1.6647	80.5	3.33786	80.47
		1.6765	76	3.3614	84.45
		1.6883	72.4	3.38494	87.32
		1.7	69.7	3.40848	90.03
		1.7118	67.9	3.43202	93.14
		1.7236	66.5	3.45557	96.58
		1.7353	65.3	3.47911	99.73
		1.7471	64.2	3.50265	102.68
		1.7589	62.8	3.52619	105.43
		1.7706	61.8	3.54973	108.76
		1.7824	60.8	3.57327	113.13
		1.7942	60.3	3.59681	118.63
		1.806	60.4	3.62035	125.53
		1.8177	61.3	3.64389	132.72
		1.8295	63.2	3.66744	139.12
		1.8413	66.3	3.69098	142.59
		1.853	70.2	3.71452	143.09
		1.8648	74.8	3.73806	141.35
		1.8766	79.9	3.7616	138.8
		1.8884	85.2	3.78514	137.24
		1.9001	90.7	3.80868	136.5
		1.9119	95.9	3.83222	135.89
		1.9237	101.3	3.85576	134.41
		1.9354	107.2	3.8793	132.02
		1.9472	116.5	3.90285	129.22
		1.959	133.6	3.92639	126.18
		1.9707	156.4	3.94993	123.44
		1.9825	184	3.97347	120.76
		1.9943	212	3.99701	118.13
		2.0061	236.6	4.02055	115.75
		2.0178	255	4.04409	113.62
		2.0296	266.4	4.06763	110.55
		2.0414	273.2	4.09117	106.28
		2.0531	276.2	4.11472	100.83
		2.0649	276.4	4.13826	95.06
		2.0767	274.4	4.1618	89.68
		2.0885	271.2	4.18534	85.72
		2.1002	264.5	4.20888	83.48
		2.112	251.4	4.23242	83.41
		2.1238	228.4	4.25596	85.43
		2.1355	200	4.2795	87.78
		2.1473	172.5	4.30304	90.02
		2.1591	150.4	4.32659	91.56
		2.1708	146.2	4.35013	92.39
		2.1826	152.1	4.37367	92.19
		2.1944	168	4.39721	90.83
		2.2062	187.3	4.42075	88.35
		2.2179	209	4.44429	84.68
		2.2297	231.1	4.46783	80.97
		2.2415	247.9	4.49137	77.72
		2.2532	263.1	4.51491	75.46
		2.265	273.8	4.53845	73.77
		2.2768	282.7	4.562	71.98
		2.2885	288.6	4.58554	70.02
		2.3003	291.6	4.60908	67.81
		2.3121	290.6	4.63262	65.48
		2.3239	286.5	4.65616	62.97
		2.3356	279.4	4.6797	60.55
		2.3474	269.5	4.70324	58.27
		2.3592	254.9	4.72678	56.13
		2.3709	234	4.75032	54.6
		2.3827	206.7	4.77387	53.54
		2.3945	173.5	4.79741	53.17
		2.4063	138	4.82095	53.11
		2.418	104.6	4.84449	53.36
		2.4298	77.7	4.86803	53.97
		2.4416	59.1	4.89157	55.01
		2.4533	46.3	4.91511	56.74
		2.4651	41.1	4.93865	59.25
		2.4769	39.8	4.96219	62.32
		2.4886	43.8	4.98574	65.12
		2.5004	48	5.00928	66.8
		2.5122	51	5.03282	67.7
		2.524	51.8	5.05636	69.38
		2.5357	51.7	5.0799	72.65
		2.5475	51.4	5.10344	77.52
		2.5593	50.5	5.12698	83.34
		2.571	49.5	5.15052	88.86
		2.5828	48.6	5.17406	92.42
		2.5946	48.2	5.1976	94.09
		2.6064	48.7	5.22115	95.15
		2.6181	50.4	5.24469	97.02
		2.6299	52.9	5.26823	100.24
		2.6417	55.7	5.29177	104.18
		2.6534	58.6	5.31531	108.05
		2.6652	61.4	5.33885	111.5
		2.677	64.2	5.36239	114.22
		2.6887	67.1	5.38593	116.4
		2.7005	70.3	5.40947	118.1
		2.7123	73.5	5.43302	119.63
		2.7241	76.8	5.45656	120.72
		2.7358	79.7	5.4801	120.72
		2.7476	82.1	5.50364	119.4
		2.7594	83.7	5.52718	117.91
		2.7711	84.8	5.55072	118.14
		2.7829	85.3	5.57426	120.59
		2.7947	85.5	5.5978	124.09
		2.8065	85.4	5.62134	126.65
		2.8182	84.9	5.64489	126.1
		2.83	84.2	5.66843	122.86
		2.8418	83.1	5.69197	118.06
		2.8535	81.7	5.71551	114.44
		2.8653	80	5.73905	112.3
		2.8771	78.1	5.76259	111.27
		2.8888	75.5	5.78613	109.74
		2.9006	72.1	5.80967	106.25
		2.9124	67.7	5.83321	100.79
		2.9242	62.8	5.85675	95.18
		2.9359	58.2	5.8803	91.35
		2.9477	55.7	5.90384	89.88
		2.9595	54.8	5.92738	88.96
		2.9712	55.6	5.95092	86.73
		2.983	57.4	5.97446	82.82
		2.9948	59.1	5.998	78.23
		3.0066	59.4	6.02154	74.44
		3.0183	59.4	6.04508	72.21
		3.0301	63.1	6.06862	71.58
		3.0419	77.5	6.09217	71.47
		3.0536	102.4	6.11571	70.5
		3.0654	134.9	6.13925	67.91
		3.0772	167.8	6.16279	64.05
		3.0889	194.7	6.18633	60.64
		3.1007	210.8	6.20987	58.57
		3.1125	219.1	6.23341	58.11
		3.1243	223.7	6.25695	58.56
		3.136	226.3	6.28049	59.18
		3.1478	227	6.30404	59.34
		3.1596	224.9	6.32758	58.67
		3.1713	220.1	6.35112	57.26
		3.1831	211	6.37466	55.46
		3.1949	195.9	6.3982	54.19
		3.2067	175	6.42174	53.9
		3.2184	150.7	6.44528	54.31
		3.2302	126.1	6.46882	54.72
		3.242	104.9	6.49236	54.8
		3.2537	90.1	6.5159	54.71
		3.2655	81.6	6.53945	54.37
		3.2773	78.9	6.56299	54.05
		3.289	79.6	6.58653	54.1
		3.3008	80.5	6.61007	54.51
		3.3126	79.5	6.63361	55.47
		3.3244	76.5	6.65715	57.19
		3.3361	71.8	6.68069	59.38
		3.3479	67	6.70423	61.26
		3.3597	62.6	6.72777	61.35
		3.3714	58.7	6.75132	59.93
		3.3832	55.3	6.77486	57.49
		3.395	52.4	6.7984	54.72
		3.4068	50.7	6.82194	52.37
		3.4185	50.7	6.84548	50.63
		3.4303	51.9	6.86902	49.83
		3.4421	54.6	6.89256	50.41
		3.4538	58.3	6.9161	52.17
		3.4656	61.7	6.93964	54.65
		3.4774	64.7	6.96318	56.9
		3.4891	67.4	6.98673	58.7
		3.5009	70.1	7.01027	60.53
		3.5127	73.4	7.03381	63.41
		3.5245	77.4	7.05735	68.37
		3.5362	82.2	7.08089	76.09
		3.548	86.8	7.10443	85.76
		3.5598	91	7.12797	95.55
		3.5715	94.2	7.15151	103.17
		3.5833	96.5	7.17505	107.76
		3.5951	98.1	7.1986	110.12
		3.6068	98.9	7.22214	111.88
		3.6186	99	7.24568	113.95
		3.6304	98.3	7.26922	116.19
		3.6422	96.8	7.29276	117.99
		3.6539	94.6	7.3163	119.38
		3.6657	91.5	7.33984	121.43
		3.6775	87.3	7.36338	124.76
		3.6892	82.6	7.38692	128.77
		3.701	77.8	7.41047	132.01
		3.7128	73.9	7.43401	133.28
		3.7246	70.9	7.45755	132.4
		3.7363	68.7	7.48109	129.37
		3.7481	67.1	7.50463	124.59
		3.7599	65.6	7.52817	119.2
		3.7716	64.4	7.55171	114.98
		3.7834	63.3	7.57525	113.81
		3.7952	62.6	7.59879	116.42
		3.8069	62.6	7.62233	122.17
		3.8187	63.3	7.64588	128.85
		3.8305	64.3	7.66942	133.34
		3.8423	65.3	7.69296	133.7
		3.854	65.9	7.7165	130.09
		3.8658	66.4	7.74004	124.63
		3.8776	67	7.76358	119.88
		3.8893	67.6	7.78712	116.28
		3.9011	68.5	7.81066	112.12
		3.9129	69.7	7.8342	105.98
		3.9247	70.8	7.85775	98.52
		3.9364	71.7	7.88129	91.46
		3.9482	72.5	7.90483	85.86
		3.96	73.5	7.92837	81.52
		3.9717	74.7	7.95191	77.46
		3.9835	76	7.97545	72.51
		3.9953	77.1	7.99899	66.54
		4.007	77.9	8.02253	60.71
		4.0188	78.5	8.04607	56.3
		4.0306	79.4	8.06962	53.68
		4.0424	80.6	8.09316	52.72
		4.0541	82	8.1167	52.75
		4.0659	83.8	8.14024	52.97
		4.0777	85.5	8.16378	52.8
		4.0894	86.9	8.18732	52.3
		4.1012	87.8	8.21086	51.75
		4.113	87.9	8.2344	51.08
		4.1248	87.3	8.25794	50.39
		4.1365	85.8	8.28148	50
				8.30503	50.11
				8.32857	50.57
				8.35211	51.05
				8.37565	51.32
				8.39919	51.56
				8.42273	51.98
				8.44627	52.57
				8.46981	53.04
				8.49335	53.07
				8.5169	52.79
				8.54044	52.56
				8.56398	52.59
				8.58752	52.86
				8.61106	53.33
				8.6346	53.89
				8.65814	54.34
				8.68168	54.43
				8.70522	54.23
				8.72877	54.01
				8.75231	53.95
				8.77585	54.11
				8.79939	54.51
				8.82293	55.15
				8.84647	55.86
				8.87001	56.56
				8.89355	57.48
				8.91709	59.07
				8.94063	60.55
				8.96418	60.54
				8.98772	58.77
				9.01126	56.55
				9.0348	55.24
				9.05834	54.89
				9.08188	54.97
				9.10542	55.1
				9.12896	55.23
				9.1525	55.49
				9.17605	55.96
				9.19959	56.76
				9.22313	58.2
				9.24667	60.15
				9.27021	61.18
				9.29375	60.07
				9.31729	57.53
				9.34083	55.4
				9.36437	54.67
				9.38792	54.67
				9.41146	54.56
				9.435	54.27
				9.45854	54.01
				9.48208	54.09
				9.50562	54.28
				9.52916	54.37
				9.5527	54.38
				9.57624	54.81
				9.59978	55.45
				9.62333	55.75
				9.64687	55.51
				9.67041	55.12
				9.69395	54.93
				9.71749	54.76
				9.74103	54.64
				9.76457	54.53
				9.78811	54.59
				9.81165	54.39
				9.8352	53.72
