# Supplementary material for: Mechanical instability and interfacial energy drive biofilm morphogenesis
Source: eLife. 2019 Mar 8;8:e43920. doi: 10.7554/eLife.43920 (PMC6453567; doi:10.7554/eLife.43920)
Supplement: Figure 5—source data 1. [file elife-43920-fig5-data1.xlsx]

## Sheet: Figure 5
		Figure 5C
Description		Interfacial energies of Δ BCbiofilm. Data are represented as mean, std and # of measurements.
Computed/Measured quantity
			mean (mN/m)	std (mN/m)	# of measurements
		biofilm-air	73.05	3.15	3
		biofilm-water	1.54	3.15	3
		Γ	NA
