# Supplementary material for: Mechanical instability and interfacial energy drive biofilm morphogenesis
Source: eLife. 2019 Mar 8;8:e43920. doi: 10.7554/eLife.43920 (PMC6453567; doi:10.7554/eLife.43920)
Supplement: Figure 6—figure supplement 1—source data 1. [file elife-43920-fig6-figsupp1-data1.xlsx]

## Sheet: Figure 6 - figure supplement 1
		Figure 6 - figure supplement 1 A								Figure 6 - figure supplement 1 B					Figure 6 - figure supplement 1 D								Figure 6 - figure supplement 1 E
Description		Data extracted using customized Matlab code. Data are represented as (t,α) for different cases. See main text for the depository of the code and figure legend for more details.								Data extracted using customized Matlab code. Data are represented as (x,κ,Vf,I). See main text for the depository of the code and figure legend for more details.					Data extracted using customized Matlab code. Data are represented as (t,<R>) for different cases. See main text for the depository of the code and figure legend for more details.								Data extracted using customized Matlab code. Data are represented as mean std for each condition. # of measurements = 3. See main text for the depository of the code and figure legend for more details.
Condition
Computed/Measured quantity			WT - 0.4%			WT - 1.0%
			Copy 1	Copy 2	Copy 3	Copy 1	Copy 2	Copy 3								Copy 1		Copy 2		Copy 3				<Vf> before (μm/min)		<Vf> after (μm/min)
		t (h)	α							x(mm)	κ (1/mm)	Vf (μm/min)	I		t (h)	<Rf> (mm)	<Rp> (mm)	<Rf> (mm)	<Rp> (mm)	<Rf> (mm)	<Rp> (mm)		Agar conc.	mean	std	mean	std
		6.25	1.06015	1.10263	1.05898	1.06516	1.02659	1.02353		0	0.175736	3.00076	0.593059		6.25	1.83747	1.83747	1.87067	1.87067	1.83923	1.82264		0.004	4.58136	0.229764	2.86302	0.179822
		7.5	1.05761	1.10032	1.07529	1.05377	1.04471	1.03252		0.06937	0.171288	2.98212	0.595358		7.5	1.90994	1.90994	1.90158	1.90158	1.9084	1.9084		0.005	4.15788	0.13887	2.71462	0.51949
		8.75	1.04558	1.06731	1.06578	1.05757	1.06071	1.02378		0.138835	0.166835	2.9659	0.599752		8.75	2.04046	2.04046	2.02059	1.86759	1.98518	1.98518		0.006	3.10306	0.178821	2.41572	0.048755
		10	1.05338	1.0563	1.05898	1.07761	1.0405	1.04334		0.208399	0.162387	2.95196	0.604178		10	2.13734	NA	2.11661	2.00593	2.1	2.1		0.007	3.08738	0.253579	2.13299	0.18654
		11.25	1.05354	1.05211	1.04992	1.05097	1.03955	1.05267		0.292014	0.157063	2.93994	0.602409		11.25	2.27884		2.22146	2.00593	2.23557	2.14427		0.008	2.2119	0.1122	1.69287	0.262103
		12.5	1.04968	1.05708	1.05748	1.06397	1.05704	1.05424		0.361814	0.152647	2.92836	0.598199		12.5	2.446		2.3896	2.3896	2.37599	2.14427		0.01	1.30771	0.026597	0.480649	0.061516
		13.75	1.07182	1.06868	1.0553	1.06354	1.05599	1.04951		0.431726	0.148255	2.91877	0.59388		13.75	2.62465		2.5428	2.28261	2.51986	2.17885		0.015	0.539724	0.045828	0.472231	0.117859
		15	1.04624	1.06997	1.0572	1.05838	1.04713	1.04874		0.501755	0.143893	2.91106	0.595998		15	2.79113	2.28261	2.72875	2.35178	2.68795	2.35178		0.03	0.426525	0.088384	0.361716	0.02394
		16.25	1.05016	1.06307	1.04819	1.05838	1.04073	1.04196		0.571901	0.139565	2.9051	0.601504		16.25	2.95156	2.42095	2.87694	2.28261	2.89407	2.42095
		17.5	1.04788	1.06505	1.0484	1.04324	1.04426	1.04213		0.642166	0.135275	2.90077	0.596633		17.5	3.15814	2.49012	3.08224	2.69763	2.99091	2.49012
		18.75	1.04326	1.07417	1.05204	1.03835	1.04215	1.02911		0.712553	0.131026	2.89796	0.599757		18.75	3.46531	2.69763	3.32955	2.90514	3.16522	2.62846
		20	1.05308	1.07293	1.05202	1.0407	1.04279	1.0388		0.797176	0.125986	2.89593	0.600397		20	3.81535	2.83597	3.77694	3.4585	3.34368	2.7668
		21.25	1.05226	1.06809	1.04999	1.03978	1.04099	1.03507		0.867829	0.121837	2.89423	0.600007		21.25	4.0895	3.04348	4.07229	3.66601	3.56779	2.90514
		22.5	1.0703	1.07362	1.05568	1.0455	1.03239	1.03437		0.938603	0.117737	2.8937	0.597201		22.5	4.36285	3.18182	4.34766	3.94269	3.80089	2.83597
		23.75	1.05251	1.06995	1.05419	1.04265	1.03384	1.03658		1.0095	0.113687	2.89422	0.598071		23.75	4.62331	3.25374	4.62045	4.08103	4.05267	2.83597
		25	1.04436	1.07316	1.05585	1.03662	1.02212	1.04101		1.08051	0.109688	2.89566	0.597092		25	4.84779	3.32016	4.88582	4.28854	4.29892	2.90514
		26.25	1.07103	1.06593	1.06011	1.037	1.04481	1.03561		1.15163	0.105741	2.89789	0.600646		26.25	5.1091	3.38933	5.11844	4.28854	4.41858	3.04348
		27.5	1.06735	1.0712	1.06107	1.03927	1.02902	1.02917		1.22288	0.101845	2.9008	0.600552		27.5	5.37808	3.66601	5.39133	4.42688	4.84259	2.97431
		28.75	1.0527	1.07114	1.064	1.03916	1.03967	1.02823		1.29423	0.098001	2.90427	0.598259		28.75	5.66132	3.80756	5.68149	4.63439	5.13795	3.11265
		30	1.0502	1.06984	1.05453	1.04207	1.03228	1.02564		1.37999	0.093457	2.90781	0.599163		30	6.00984	3.94857	6.01045	4.70356	5.40287	3.25099
		31.25	1.0617	1.07589	1.05883	1.03696	1.02423	1.03075		1.45158	0.089725	2.91056	0.600102		31.25	6.33253	4.11909	6.33195	4.98024	5.7169	3.52767
		32.5	1.0521	1.07914	1.06343	1.03499	1.02914	1.03293		1.52326	0.086497	2.91349	0.597004		32.5	6.66033	4.28854	6.6698	4.98024	6.04062	3.80435
		33.75	1.0552	1.07337	1.06584	1.03627	1.02462	1.0398		1.59505	0.095872	2.91634	0.599844		33.75	7.05079	4.56759	7.0241	5.32609	6.37263	4.08103
		35	1.0557	1.07442	1.07937	1.03385	1.01659	1.02742		1.66696	0.105456	2.9186	0.602183		35	7.43799	4.80953	7.40818	5.5336	6.72125	4.21937
		36.25	1.0568	1.0872	1.08933	1.03131	1.0186	1.02432		1.73903	0.114754	2.92014	0.602575		36.25	7.88604	5.04941	7.83168	5.18775	7.05465	4.35771
		37.5	1.0646	1.0748	1.10395	1.03313	1.01479	1.02527		1.81129	0.123727	2.92085	0.599855		37.5	8.31776	5.39526	8.25876	5.46443	7.42194	4.56522
		38.75	1.0682	1.06845	1.1053	1.03798	1.02379	1.03356		1.88377	0.132335	2.92062	0.598999		38.75	8.77015	5.5336	8.72114	5.60277	7.79615	7.33202
		40	1.087	1.07443	1.09798	1.0316	1.03853	1.03309		1.97109	0.142129	2.91731	0.598879		40	9.25192	5.74111	9.20228	5.87945	8.28795	7.81621
		41.25	1.1211	1.07943	1.09319	1.02923	1.02264	1.04067		2.04418	0.149801	2.91273	0.599631		41.25	9.69653	6.08696	9.68245	6.08696	8.71819	8.23123
		42.5	1.1698	1.08912	1.09565	1.03593	1.01421	1.05731		2.11762	0.156988	2.90686	0.602607		42.5	10.1093	6.15613	10.1692	6.36364	9.12906	8.71542
		43.75	1.1711	1.11454	1.09631	1.03459	1.01036	1.03865		2.19144	0.163658	2.89961	0.595126		43.75	10.4579	10.0297	10.623	6.57115	9.52194	9.06127
		45	1.183	1.16002	1.09737	1.02736	1.01194	1.01634		2.26568	0.169779	2.89093	0.593867		45	10.7361	10.583	11.013	6.70949	9.87263	9.40712
		46.25	1.1711	1.16467	1.10397	1.02726	1.01745	1.03269		2.34039	0.175325	2.88075	0.600206		46.25	11.0214	10.9289	11.3357	8.09289	10.224	9.75297
		47.5	1.1825	1.17054	1.11111	1.02946	1.02415	1.04886		2.43071	0.176943	2.8683	0.603138		47.5	11.2595	11.0672	11.6596	11.0672	10.545	10.0297
		48.75	1.1945	1.16393	1.11294	1.03534	1.03456	1.06137		2.50656	0.171369	2.85389	0.601109		48.75	11.4963	11.2055	11.9358	11.5514	10.8701	10.3063
		50	1.2036	1.15708	1.11981	1.0375	1.04549	1.07134		2.5829	0.166341	2.83917	0.595431		50	11.7785	11.4131	12.2556	11.7589	11.173	10.583
		51.25	1.2175	1.14101	1.13478	1.04039	1.06401	1.05839		2.65969	0.161822	2.82481	0.593538		51.25	12.003	11.6897	12.5075	12.1047	11.422	10.8251
		52.5	1.21	1.14024	1.13013	1.03819	1.06086	1.03822		2.73689	0.15778	2.81146	0.595705		52.5	12.2186	11.9664	12.7654	12.4506	11.7624	11.1364
		53.75	1.2033	1.14109	1.13961	1.04066	1.06027	1.04189		2.81445	0.154189	2.79971	0.600282		53.75	12.4019	12.1739	12.9765	12.6581	12.0218	11.3439
		55	1.2112	1.1436	1.14137	1.047	1.053	1.03974		2.89234	0.151023	2.7901	0.603501		55	12.6603	12.3814	13.2439	12.9348	12.3233	11.4476
		56.25	1.213	1.15333	1.14391	1.04456	1.05959	1.04622		2.97051	0.148262	2.78316	0.601377		56.25	12.8939	12.6581	13.4932	13.1423	12.6035	11.7243
		57.5	1.2083	1.1642	1.13701	1.04723	1.05393	1.04613		3.04891	0.145887	2.77937	0.59846		57.5	13.1189	12.8656	13.7498	13.3498	12.9071	11.8972
		58.75	1.2031	1.16519	1.13811	1.05516	1.05355	1.05139		3.1275	0.143884	2.77924	0.600124		58.75	13.3264	13.004	13.9973	13.4881	13.1845	12.0356
		60	1.2086	1.17657	1.13398	1.06334	1.05103	1.06457		3.20625	0.14224	2.78331	0.598334		60	13.5411	13.0731	14.225	13.6957	13.4875	12.2085
		61.25	1.2078	1.19084	1.13998	1.07046	1.05353	1.06886		3.30087	0.140728	2.78949	0.59784		61.25	13.7343	13.3498	14.4795	13.9032	13.7794	12.3814
		62.5	1.2106	1.18708	1.14586	1.08054	1.05913	1.07793		3.37979	0.146596	2.79962	0.599068		62.5	13.9624	13.5573	14.7356	14.1107	14.0595	12.6581
		63.75	1.2151	1.183	1.1463	1.07914	1.06161	1.07523		3.45877	0.156688	2.8147	0.603162		63.75	14.2148	13.7648	14.9886	14.3182	14.35	12.9348
		65	1.22621	1.18279	1.15643	1.07707	1.06639	1.08162		3.5537	0.168129	2.83124	0.601408		65	14.4647	13.9723	15.2785	14.5257	14.6412	13.253
		66.25	1.2432	1.18343	1.16363	1.08034	1.06559	1.07488		3.63302	0.177019	2.84875	0.6023		66.25	14.7518	14.0415	15.5591	14.7678	14.9331	13.4881
		67.5	1.2498	1.16222	1.16938	1.0955	1.07171	1.08122		3.72855	0.186809	2.86673	0.599822		67.5	15.0783	14.1799	15.8358	15.0099	15.216	13.7372
		68.75	1.2634	1.16394	1.18059	1.09829	1.07693	1.09011		3.8085	0.194159	2.88336	0.599632		68.75	15.3567	14.249	16.1955	15.2866	15.4969	13.9723
		70	1.277	1.16443	1.18756	1.1041	1.08123	1.08969		3.90498	0.201923	2.89762	0.603588		70	15.5972	14.3182	16.4579	15.5633	15.7811	14.1799
		71.25	1.2775	1.17966	1.19512	1.10835	1.09137	1.08988		3.98589	0.207452	2.91076	0.60554		71.25	15.7841	14.4565	16.7333	15.7708	16.0461	14.3735
		72.5	1.2795	1.19747	1.19568	1.10884	1.0916	1.09786		4.08372	0.212901	2.91814	0.602574		72.5	15.9961	14.5257	16.9242	15.9437	16.2895	14.5395
		73.75	1.2882	1.20942	1.20112	1.10931	1.09802	1.09689		4.18248	0.21701	2.92513	0.594334		73.75	16.1774	14.5257	17.1558	16.1858	16.5621	14.7609
		75	1.3031	1.24526	1.21045	1.10959	1.09945	1.10392		4.26558	0.219392	2.92488	0.595662		75	16.4115	14.5257	17.3901	16.3933	16.7723	14.9338
		76.25	1.3095	1.23282	1.21733	1.11342	1.10301	1.10753		4.34949	0.212374	2.92482	0.599024		76.25	16.6001	14.7332	17.6205	16.3933	16.9971	15.1206
		77.5	1.3082	1.24862	1.23106	1.11178	1.11401	1.10993		4.45121	0.198634	2.9193	0.601365		77.5	16.8078	14.7332	17.8494	16.4625	17.2033	15.2797
										4.53672	0.188733	2.91531	0.59915
										4.6228	0.180091	2.91372	0.596047
										4.72669	0.171221	2.91224	0.595895
										4.81363	0.164968	2.91141	0.601119
										4.90079	0.159666	2.91249	0.600739
										4.98805	0.155256	2.91507	0.596144
										5.0753	0.151689	2.91874	0.594205
										5.16242	0.148933	2.92308	0.60347
										5.24931	0.146966	2.92762	0.602563
										5.33583	0.145725	2.93186	0.600475
										5.43905	0.142721	2.93435	0.598395
										5.52454	0.14011	2.93429	0.599881
										5.60955	0.137447	2.93249	0.599487
										5.69408	0.134735	2.92902	0.600141
										5.77812	0.131978	2.92449	0.59878
										5.86166	0.129177	2.91957	0.600955
										5.96126	0.125759	2.91478	0.601513
										6.0437	0.122866	2.90816	0.596744
										6.12563	0.11993	2.90315	0.593487
										6.20702	0.116953	2.90044	0.597949
										6.28789	0.113932	2.90071	0.595683
										6.36821	0.116084	2.90461	0.593524
										6.46386	0.128381	2.91115	0.598646
										6.54296	0.139026	2.9195	0.601542
										6.62151	0.150038	2.93081	0.598281
										6.6995	0.161418	2.94454	0.5966
										6.77695	0.173162	2.96	0.592974
										6.86917	0.187723	2.97489	0.597417
										6.94544	0.20023	2.9886	0.597889
										7.02118	0.213051	3.00192	0.597135
										7.09643	0.226156	3.01414	0.596789
										7.18608	0.242198	3.02222	0.595762
										7.26027	0.255154	3.0264	0.597399
										7.33403	0.250647	3.02748	0.601036
										7.42201	0.243804	3.02429	0.598587
										7.49491	0.237564	3.01709	0.596273
										7.56747	0.230874	3.00865	0.596962
										7.65414	0.222301	2.99937	0.596876
										7.72604	0.214747	2.98673	0.598664
										7.79767	0.206855	2.97431	0.599533
										7.86906	0.198658	2.96247	0.601157
										7.95442	0.188464	2.9515	0.596561
										8.02532	0.179703	2.93946	0.595544
										8.09602	0.170728	2.92929	0.594598
										8.16653	0.162641	2.92137	0.594298
										8.23685	0.155031	2.91603	0.593721
										8.30703	0.147182	2.9135	0.596388
										8.39105	0.137484	2.91244	0.59427
										8.46095	0.129197	2.9146	0.594577
										8.53074	0.120747	2.92034	0.594487
										8.60044	0.112155	2.92959	0.597596
										8.67007	0.103442	2.94224	0.599769
										8.73964	0.094623	2.95819	0.597423
										8.80916	0.085717	2.97735	0.598089
										8.87864	0.076738	2.99963	0.597994
										8.96198	0.066608	3.02469	0.597511
										9.0314	0.078469	3.05203	0.59846
										9.1008	0.091097	3.08093	0.598735
										9.17017	0.103774	3.10991	0.593086
										9.23951	0.1165	3.13747	0.592819
										9.30882	0.129273	3.16215	0.596207
										9.3781	0.142085	3.18303	0.600326
										9.44734	0.154923	3.19994	0.604764
										9.53039	0.17034	3.212	0.600299
										9.59957	0.18317	3.21843	0.598116
										9.66873	0.195951	3.22038	0.597934
										9.73789	0.208649	3.21773	0.598934
										9.82089	0.217704	3.20967	0.597672
										9.89009	0.215036	3.19498	0.59584
										9.95933	0.21219	3.17653	0.594143
										10.0286	0.209179	3.15516	0.594821
										10.1119	0.205365	3.1305	0.599466
										10.1814	0.202034	3.10328	0.603882
										10.251	0.198579	3.07562	0.600064
										10.3208	0.195012	3.04814	0.59883
										10.4047	0.1906	3.02143	0.59737
										10.4748	0.186829	2.994	0.59868
										10.5451	0.182985	2.96867	0.598287
										10.6156	0.179079	2.94607	0.596308
										10.6863	0.17938	2.92678	0.597157
										10.7572	0.180743	2.91117	0.596397
										10.8426	0.182379	2.89846	0.600274
										10.9139	0.183736	2.88882	0.5972
										10.9855	0.185085	2.88354	0.592517
										11.0574	0.186421	2.88286	0.591783
										11.1294	0.187738	2.88666	0.593682
										11.2161	0.189289	2.89321	0.596551
										11.2887	0.19055	2.90127	0.597747
										11.3614	0.191779	2.91183	0.59441
										11.4344	0.19297	2.9243	0.593918
										11.5223	0.19269	2.93653	0.594782
										11.5959	0.189428	2.94749	0.59524
										11.6697	0.185819	2.95881	0.593765
										11.7439	0.181893	2.97019	0.595792
										11.8334	0.176803	2.97771	0.596656
										11.9085	0.172282	2.98462	0.59394
										11.9841	0.16754	2.99071	0.595006
										12.0755	0.161602	2.99472	0.593683
										12.1524	0.156486	2.996	0.596526
										12.2297	0.151247	2.99702	0.597222
										12.3078	0.145918	2.99805	0.594951
										12.3866	0.140524	2.99937	0.592899
										12.482	0.137368	2.99994	0.589477
										12.5623	0.135867	3.0003	0.594815
										12.6431	0.134905	3.00146	0.601281
										12.7245	0.134458	3.00343	0.599509
										12.8063	0.134506	3.00618	0.59707
										12.8885	0.135038	3.00971	0.595164
										12.9709	0.136047	3.01402	0.596094
										13.0701	0.137887	3.01603	0.592823
										13.153	0.139951	3.01824	0.596542
										13.2359	0.142507	3.02071	0.598322
										13.3188	0.145572	3.02346	0.598332
										13.4182	0.148781	3.02205	0.59752
										13.5008	0.149411	3.02014	0.597462
										13.6	0.149558	3.01843	0.596358
										13.6827	0.14917	3.01152	0.595196
										13.7655	0.148323	3.00533	0.593582
										13.865	0.146716	2.99765	0.594405
										13.9483	0.144903	2.98764	0.598295
										14.0319	0.142679	2.97897	0.597737
										14.1327	0.139503	2.9689	0.594579
										14.2172	0.136468	2.9582	0.593107
										14.3022	0.133111	2.94913	0.597027
										14.3879	0.129546	2.94167	0.59811
										14.4915	0.128316	2.93579	0.597934
										14.5783	0.128257	2.92969	0.596012
										14.6656	0.128994	2.92569	0.596156
										14.7531	0.130525	2.9237	0.598785
										14.8407	0.132861	2.92361	0.596486
										14.9282	0.136031	2.92529	0.593307
										15.0156	0.140078	2.92855	0.591317
										15.1026	0.145065	2.93315	0.595494
										15.1893	0.151074	2.93881	0.594933
										15.2753	0.158209	2.94523	0.58954
										15.3607	0.166599	2.95211	0.592286
										15.4453	0.175279	2.95914	0.5978
										15.5456	0.18099	2.96511	0.597582
										15.6282	0.185636	2.96866	0.594647
										15.71	0.190152	2.97237	0.592362
										15.7911	0.194514	2.97657	0.594796
										15.8873	0.199511	2.97939	0.596012
										15.9667	0.203447	2.98117	0.594916
										16.0455	0.207151	2.98448	0.595308
										16.1391	0.211253	2.98843	0.597331
										16.2166	0.214359	2.99133	0.595189
										16.2935	0.217158	2.99566	0.594002
										16.3699	0.219629	3.0008	0.595591
										16.4609	0.215721	3.00263	0.595337
										16.5364	0.21098	3.00459	0.597283
										16.6114	0.205881	3.00666	0.596382
										16.7009	0.199323	3.00819	0.591947
										16.7751	0.193515	3.00726	0.593755
										16.849	0.187419	3.00625	0.593422
										16.9226	0.181056	3.00502	0.590872
										16.9958	0.174445	3.00343	0.591477
										17.0833	0.166211	3.00025	0.589809
										17.156	0.159117	2.99577	0.58718
										17.2283	0.151829	2.99201	0.585715
										17.3004	0.150479	2.98986	0.587498
										17.3723	0.158335	2.9897	0.588594
										17.4439	0.166304	2.99141	0.588135
										17.5294	0.175999	2.99287	0.587212
										17.6005	0.184173	2.99538	0.589362
										17.6713	0.192414	2.99908	0.593156
										17.7419	0.200703	3.0038	0.591849
										17.8264	0.210683	3.00868	0.593706
										17.8965	0.218995	3.01206	0.595756
										17.9665	0.227272	3.01579	0.597113
										18.0363	0.235483	3.01937	0.593053
										18.1199	0.244496	3.02035	0.588706
										18.1894	0.231987	3.01796	0.59175
										18.2588	0.218423	3.01398	0.594139
										18.3282	0.204571	3.00886	0.596258
										18.4113	0.187656	3.00091	0.599566
										18.4805	0.173376	2.99247	0.596341
										18.5497	0.158979	2.98441	0.596358
										18.6189	0.144499	2.97717	0.596679
										18.6881	0.129967	2.9712	0.597027
										18.7711	0.112491	2.96612	0.595336
										18.8403	0.097918	2.96267	0.59568
										18.9095	0.083348	2.96222	0.596484
										18.9787	0.080736	2.96569	0.594217
										19.0479	0.096036	2.97322	0.596693
										19.1171	0.111299	2.98392	0.596683
										19.1864	0.126508	2.99684	0.594171
										19.2556	0.141638	3.01103	0.595553
										19.3388	0.15965	3.0246	0.590969
										19.4082	0.174494	3.03628	0.595621
										19.4776	0.189142	3.04616	0.595153
										19.5471	0.203539	3.0533	0.596467
										19.6306	0.220401	3.05672	0.59889
										19.7004	0.234027	3.05259	0.597244
										19.7703	0.247185	3.04281	0.595486
										19.8404	0.235959	3.02682	0.595151
										19.9247	0.215487	3.00438	0.593822
										19.9952	0.198682	2.97614	0.591934
										20.066	0.182142	2.94513	0.595732
										20.1369	0.165888	2.91261	0.592714
										20.2081	0.149929	2.8798	0.590257
										20.2794	0.134266	2.84795	0.58757
										20.351	0.118891	2.81829	0.595478
										20.437	0.100803	2.79124	0.597848
										20.509	0.086008	2.7688	0.593069
										20.5811	0.071442	2.75235	0.589883
										20.6533	0.063252	2.74301	0.589486
										20.7256	0.079713	2.74117	0.593909
										20.7981	0.095937	2.74588	0.596034
										20.8707	0.111884	2.75602	0.598743
										20.9435	0.127509	2.77045	0.594903
										21.0165	0.142762	2.78805	0.592179
										21.1045	0.160496	2.80737	0.590673
										21.178	0.174729	2.82509	0.591008
										21.2519	0.188397	2.84234	0.593128
										21.3261	0.20143	2.858	0.59226
										21.4006	0.213755	2.87097	0.593437
										21.4906	0.227506	2.87652	0.594994
										21.5661	0.224653	2.87707	0.597965
										21.6421	0.212857	2.87283	0.599012
										21.7339	0.19899	2.86421	0.59555
										21.8111	0.187712	2.85008	0.594824
										21.8888	0.176713	2.83403	0.594264
										21.967	0.16601	2.81693	0.597742
										22.0458	0.155616	2.79968	0.600381
										22.1252	0.145539	2.78317	0.599526
										22.2051	0.135783	2.76829	0.594503
										22.2857	0.126347	2.75593	0.594492
										22.3831	0.115445	2.74655	0.597026
										22.465	0.107197	2.74123	0.595391
										22.5474	0.11285	2.74095	0.595016
										22.6304	0.118905	2.74516	0.596678
										22.7139	0.124882	2.75304	0.598024
										22.798	0.13079	2.76378	0.598452
										22.8825	0.136635	2.77659	0.597784
										22.9676	0.142422	2.79063	0.599206
										23.0531	0.148154	2.80508	0.598369
										23.1391	0.153828	2.81912	0.598698
										23.2255	0.159443	2.83192	0.596938
										23.3123	0.164995	2.84265	0.594955
										23.3996	0.170474	2.85047	0.595781
										23.4874	0.175627	2.85456	0.599624
										23.5932	0.174052	2.85283	0.592312
										23.6817	0.173505	2.84703	0.596568
										23.7703	0.173821	2.83878	0.598565
										23.8591	0.174995	2.82898	0.600212
										23.9479	0.177035	2.81855	0.60136
										24.0365	0.179963	2.80841	0.602739
										24.1249	0.183811	2.79951	0.601962
										24.213	0.188628	2.79279	0.600915
										24.3182	0.195776	2.78865	0.59789
										24.4052	0.202967	2.78732	0.598344
										24.4916	0.211386	2.79118	0.598031
										24.5772	0.218218	2.8012	0.598177
										24.6621	0.221172	2.81743	0.60001
										24.7462	0.224256	2.83871	0.603541
										24.8294	0.227482	2.86375	0.600975
										24.9119	0.230864	2.89125	0.602104
										24.9936	0.234412	2.91987	0.60372
										25.0906	0.238911	2.94756	0.600616
										25.1706	0.242877	2.97174	0.60333
										25.2498	0.247057	2.99265	0.603506
										25.3282	0.251466	3.00884	0.602748
										25.4058	0.256121	3.01889	0.600668
										25.4979	0.262058	3.01848	0.600893
										25.5739	0.248324	3.008	0.600056
										25.6491	0.227912	2.98893	0.598883
										25.7386	0.200829	2.96076	0.602958
										25.8126	0.176382	2.92623	0.603759
										25.8862	0.150488	2.88884	0.601207
										25.9594	0.123393	2.85046	0.603943
										26.047	0.089633	2.81113	0.603412
										26.1198	0.060739	2.77428	0.60024
										26.1925	0.031399	2.74245	0.600491
										26.2651	0.001839	2.71751	0.604336
										26.3377	-0.02772	2.70131	0.605094
										26.4104	-0.04608	2.69571	0.603184
										26.4831	-0.02053	2.70148	0.602575
										26.556	0.004859	2.71708	0.599888
										26.6288	0.030243	2.7408	0.60355
										26.7016	0.055769	2.77094	0.607796
										26.7743	0.08158	2.8058	0.604655
										26.8469	0.107815	2.84369	0.60024
										26.9194	0.134605	2.88287	0.59915
										26.9916	0.162071	2.92164	0.602673
										27.0635	0.190314	2.95825	0.607555
										27.1352	0.219416	2.99098	0.609
										27.2209	0.255547	3.0165	0.60279
										27.2919	0.268858	3.03294	0.600407
										27.3626	0.255122	3.04103	0.605516
										27.4472	0.237619	3.04134	0.603211
										27.5174	0.222306	3.03283	0.602301
										27.5874	0.206436	3.01941	0.602138
										27.6572	0.190098	3.00219	0.605342
										27.7409	0.169989	2.98151	0.607355
										27.8105	0.152895	2.95776	0.607191
										27.88	0.13556	2.93378	0.60747
										27.9495	0.118036	2.9107	0.608882
										28.0189	0.100367	2.88964	0.610007
										28.0883	0.08259	2.87173	0.60764
										28.1576	0.088138	2.85792	0.605033
										28.2408	0.101846	2.8474	0.607753
										28.3101	0.113301	2.83942	0.608642
										28.3793	0.124779	2.83427	0.6098
										28.4485	0.136268	2.83161	0.608057
										28.5177	0.147757	2.83111	0.606543
										28.5869	0.159228	2.83243	0.606071
										28.6561	0.170659	2.83521	0.601465
										28.7391	0.184288	2.83742	0.606071
										28.8083	0.195535	2.83971	0.605207
										28.8775	0.206645	2.84232	0.602943
										28.9467	0.215042	2.84489	0.604992
										29.0299	0.212749	2.84666	0.602802
										29.0993	0.210702	2.84663	0.603915
										29.1687	0.208538	2.84718	0.603989
										29.2383	0.206265	2.84845	0.602996
										29.308	0.203889	2.85052	0.603537
										29.3918	0.200916	2.85105	0.600871
										29.4617	0.198344	2.85243	0.602116
										29.5319	0.195694	2.85493	0.603733
										29.6022	0.192975	2.85866	0.602948
										29.6868	0.18963	2.86261	0.597179
										29.7575	0.186783	2.8665	0.600296
										29.8284	0.183395	2.87191	0.601538
										29.8995	0.179859	2.87896	0.604454
										29.9709	0.176307	2.88781	0.602454
										30.0568	0.172033	2.89621	0.598766
										30.1287	0.16847	2.90545	0.600588
										30.2008	0.164913	2.9156	0.600452
										30.2732	0.161367	2.9263	0.601939
										30.3459	0.157839	2.93713	0.602564
										30.4335	0.153634	2.94549	0.601093
										30.5067	0.150159	2.95325	0.597883
										30.5803	0.146716	2.96014	0.596896
										30.6542	0.144842	2.96579	0.606315
										30.7283	0.148974	2.96968	0.606827
										30.8028	0.152857	2.97096	0.603274
										30.8927	0.157172	2.9686	0.599412
										30.9679	0.160468	2.96163	0.598183
										31.0436	0.163482	2.95196	0.605267
										31.1197	0.166205	2.94033	0.606419
										31.1963	0.16863	2.9275	0.604235
										31.2733	0.170751	2.91417	0.605131
										31.3509	0.172563	2.901	0.606347
										31.4289	0.174063	2.88862	0.604094
										31.5076	0.175247	2.87765	0.605998
										31.5868	0.175088	2.86864	0.605878
										31.6666	0.173182	2.86228	0.605103
										31.7633	0.170699	2.85868	0.604713
										31.8446	0.168478	2.85676	0.603445
										31.9267	0.166129	2.85861	0.607534
										32.0094	0.163661	2.86368	0.606969
										32.093	0.161084	2.8713	0.602926
										32.1942	0.157862	2.8763	0.599638
										32.2795	0.155081	2.88245	0.605331
										32.3657	0.152222	2.88917	0.607707
										32.4527	0.149296	2.89582	0.605089
										32.5583	0.14571	2.89964	0.599402
										32.6474	0.14323	2.90204	0.598473
										32.7372	0.141872	2.90356	0.605431
										32.8276	0.141579	2.90393	0.604912
										32.9184	0.142315	2.90298	0.604086
										33.0096	0.144071	2.90088	0.60093
										33.1008	0.14686	2.89813	0.599272
										33.1921	0.15072	2.89517	0.606616
										33.2831	0.155714	2.89228	0.608384
										33.3556	0.160583	2.88804	0.605332
										33.4459	0.16786	2.88397	0.602782
										33.5355	0.176594	2.88025	0.60336
										33.6243	0.186968	2.87668	0.603096
										33.7122	0.188564	2.87305	0.605103
										33.7992	0.187129	2.86987	0.605293
										33.8853	0.185049	2.8681	0.600861
										33.9876	0.181698	2.86843	0.59816
										34.0721	0.178201	2.86979	0.598054
										34.1559	0.174074	2.87329	0.602281
										34.239	0.169334	2.87858	0.604168
										34.3217	0.164002	2.88529	0.605851
										34.4038	0.158106	2.8931	0.604214
										34.4855	0.151673	2.9017	0.600031
										34.5829	0.143293	2.90885	0.601704
										34.6638	0.137352	2.91569	0.601517
										34.7443	0.137483	2.92245	0.602596
										34.8245	0.137694	2.92827	0.601987
										34.9043	0.137988	2.93222	0.601247
										34.9838	0.138368	2.93341	0.604535
										35.063	0.138838	2.93151	0.601158
										35.1418	0.1394	2.92693	0.606039
										35.2358	0.140204	2.91906	0.607445
										35.3137	0.140986	2.90938	0.607753
										35.3913	0.141873	2.89846	0.604315
										35.4684	0.142872	2.8867	0.602389
										35.5451	0.143987	2.87449	0.605676
										35.6214	0.146666	2.86221	0.608673
										35.6973	0.151605	2.85011	0.608655
										35.7727	0.15662	2.83828	0.605707
										35.8477	0.161706	2.82682	0.60265
										35.9222	0.166855	2.81579	0.601245
										35.9964	0.172057	2.80529	0.604136
										36.0849	0.178359	2.79379	0.604199
										36.1583	0.183646	2.78269	0.602072
										36.2313	0.188953	2.77241	0.600489
										36.3039	0.194266	2.76311	0.601456
										36.3762	0.199572	2.75495	0.60074
										36.4625	0.205908	2.74767	0.602412
										36.5341	0.211142	2.73962	0.601207
										36.6055	0.216314	2.73313	0.59888
										36.6765	0.221407	2.72838	0.599893
										36.7474	0.226401	2.72556	0.59995
										36.8321	0.232232	2.72283	0.603171
										36.9024	0.236933	2.7214	0.601133
										36.9725	0.241465	2.72241	0.601865
										37.0425	0.245807	2.72606	0.598077
										37.1264	0.250735	2.73049	0.598586
										37.1961	0.25458	2.73687	0.597438
										37.2657	0.258163	2.74647	0.597352
										37.3353	0.261463	2.75948	0.599146
										37.4188	0.265021	2.77343	0.60146
										37.4883	0.267629	2.79076	0.603425
										37.5579	0.269894	2.81216	0.600169
										37.6414	0.272136	2.83726	0.596041
										37.7111	0.273592	2.86428	0.597004
										37.781	0.274662	2.89604	0.604295
										37.8369	0.275111	2.74877	0.606852
