# Supplementary material for: Mechanical instability and interfacial energy drive biofilm morphogenesis
Source: eLife. 2019 Mar 8;8:e43920. doi: 10.7554/eLife.43920 (PMC6453567; doi:10.7554/eLife.43920)
Supplement: Figure 6—figure supplement 2—source data 2. [file elife-43920-fig6-figsupp2-data2.xlsx]

## Sheet: Figure 6 - figure supplement 1
		Figure 6 - figure supplement 2 B
Description		Data extracted using customized Matlab code. Data are represented as (x,κ,Vf,I). See main text for the depository of the code and figure legend for more details. Note the spatial resolution for Vf and κ is different because computing Vf averages the position information of 5 neighboring points.
Condition
Computed/Measured quantity
		Upper contour					Bottom contour
		x(mm)	Vf (μm/min)	I	x(mm)	κ (1/mm)	x(mm)	Vf (μm/min)	I	x(mm)	κ (1/mm)
		0	3.44623	0.729311	0	0.706997	0	3.56939	0.724961	0	0.65868
		0.52869	3.3977	0.716904	0.020729	0.707111	0.600792	3.53439	0.726851	0.020608	0.658771
		0.637584	3.34349	0.702623	0.041517	0.678661	0.711509	3.48591	0.727025	0.041261	0.634673
		0.746815	3.28591	0.686804	0.062365	0.650461	0.800071	3.42829	0.722903	0.061962	0.610697
		0.834181	3.22594	0.694175	0.083277	0.622569	0.888357	3.36539	0.720352	0.082714	0.586891
		0.943046	3.16385	0.716589	0.104253	0.595034	0.976176	3.29946	0.712893	0.103516	0.563297
		1.02965	3.0993	0.633048	0.125294	0.567899	1.06343	3.23205	0.715848	0.124372	0.539949
		1.09423	3.03167	0.484044	0.146402	0.541193	1.15003	3.1647	0.730723	0.14528	0.516878
		1.17971	2.96046	0.461415	0.167576	0.514942	1.21451	3.09885	0.734447	0.166244	0.494107
		1.24332	2.88797	0.57655	0.188817	0.489162	1.29982	3.03659	0.70935	0.187261	0.471655
		1.3274	2.81866	0.651471	0.210124	0.463864	1.38446	2.98094	0.690466	0.208333	0.449535
		1.41079	2.758	0.702927	0.231497	0.439055	1.51132	2.92861	0.719101	0.22946	0.427758
		1.49371	2.70862	0.70257	0.252934	0.414733	1.68369	2.86539	0.736738	0.25064	0.40633
		1.57634	2.67163	0.664952	0.274435	0.390895	1.86511	2.76539	0.71494	0.271874	0.385252
		1.67944	2.64624	0.664694	0.295997	0.367534	1.98089	2.66239	0.685103	0.29316	0.364524
		1.78254	2.62971	0.702621	0.31762	0.344636	2.0494	2.57439	0.690811	0.314497	0.344142
		1.88571	2.62135	0.71214	0.3393	0.322188	2.11625	2.51153	0.725652	0.335885	0.3241
		1.98897	2.62058	0.692391	0.361037	0.300173	2.18079	2.47461	0.594713	0.35732	0.304391
		2.09232	2.62561	0.680936	0.382827	0.278572	2.24278	2.4536	0.444341	0.378802	0.285003
		2.21656	2.63323	0.70185	0.404668	0.257364	2.28292	2.43284	0.601968	0.400329	0.265925
		2.36258	2.63688	0.724113	0.426556	0.236526	2.34187	2.39537	0.537533	0.421899	0.247143
		2.53271	2.6254	0.732945	0.44849	0.216034	2.38065	2.33761	0.41079	0.443509	0.228642
		2.68626	2.5871	0.739331	0.470467	0.195864	2.43853	2.27305	0.620357	0.465158	0.210407
		2.84416	2.52276	0.601565	0.492481	0.175989	2.49666	2.21829	0.701326	0.486842	0.19242
		2.98242	2.43486	0.516568	0.514532	0.156383	2.53589	2.18813	0.695327	0.50856	0.174663
		3.09884	2.33097	0.656041	0.536614	0.137018	2.59584	2.18899	0.7038	0.530309	0.157119
		3.19089	2.22981	0.706555	0.558725	0.117867	2.67821	2.21572	0.702837	0.552086	0.139768
		3.25825	2.14261	0.679522	0.580861	0.098901	2.74156	2.25963	0.707504	0.573889	0.122591
		3.32364	2.07928	0.697243	0.603017	0.080093	2.82739	2.312	0.713661	0.595714	0.105568
		3.36605	2.04199	0.654419	0.625192	0.061412	2.95687	2.36394	0.71883	0.617558	0.088678
		3.40757	2.02709	0.428125	0.647379	0.042832	3.10511	2.40244	0.669399	0.639419	0.0719
		3.44838	2.02564	0.334413	0.669577	0.024321	3.27031	2.41986	0.584225	0.661293	0.055215
		3.50899	2.02556	0.659044	0.69178	0.005852	3.43323	2.4226	0.625682	0.683178	0.0386
		3.54945	2.02282	0.697856	0.713985	-0.0126	3.57538	2.41748	0.709194	0.705071	0.022035
		3.61067	2.02405	0.710276	0.736189	-0.03108	3.69735	2.40991	0.716904	0.726967	0.005499
		3.67273	2.035	0.705681	0.758386	-0.0496	3.79913	2.40312	0.708243	0.748865	-0.01103
		3.73557	2.06026	0.704629	0.780574	-0.06819	3.92138	2.39744	0.710661	0.77076	-0.02757
		3.82008	2.09925	0.704818	0.802748	-0.08689	4.02325	2.39208	0.714885	0.79265	-0.04415
		3.94663	2.14351	0.701266	0.824905	-0.10572	4.14537	2.38836	0.712264	0.814532	-0.06079
		4.07193	2.18619	0.691027	0.84704	-0.12472	4.24696	2.38674	0.707428	0.836403	-0.0775
		4.23652	2.2177	0.622465	0.869151	-0.14199	4.36884	2.38789	0.710495	0.858259	-0.09407
		4.39924	2.22136	0.546216	0.891234	-0.15178	4.51217	2.38943	0.713071	0.880098	-0.10977
		4.52119	2.21639	0.582226	0.913287	-0.15977	4.63726	2.38754	0.714524	0.901917	-0.12536
		4.62287	2.22174	0.678055	0.935309	-0.16786	4.78651	2.38001	0.71651	0.923713	-0.1411
		4.72451	2.24721	0.701478	0.957298	-0.17605	4.9361	2.36803	0.715066	0.945483	-0.15699
		4.82613	2.28958	0.706103	0.979252	-0.18435	5.08177	2.34887	0.716337	0.967226	-0.17306
		4.94808	2.333	0.711961	1.00117	-0.19277	5.24219	2.31549	0.718704	0.988938	-0.18932
		5.11123	2.35428	0.712896	1.02305	-0.20131	5.38457	2.26343	0.712142	1.01062	-0.20579
		5.27635	2.33531	0.711003	1.0449	-0.20997	5.51402	2.19616	0.7055	1.03226	-0.22248
		5.40156	2.28995	0.703902	1.0667	-0.21876	5.60438	2.12628	0.701324	1.05387	-0.23941
		5.50649	2.23747	0.708073	1.08846	-0.22769	5.69511	2.06688	0.707103	1.07543	-0.25658
		5.61172	2.19285	0.719663	1.11018	-0.23674	5.76193	2.02482	0.714519	1.09696	-0.27402
		5.71731	2.16571	0.718042	1.13186	-0.24594	5.80547	2.00482	0.723118	1.11844	-0.29173
		5.84467	2.15501	0.611334	1.1535	-0.25528	5.86898	2.00611	0.551091	1.13988	-0.30973
		5.97296	2.14952	0.56519	1.17509	-0.26477	5.9102	2.02038	0.489709	1.16127	-0.32801
		6.08052	2.13876	0.670404	1.19663	-0.2744	5.95081	2.0372	0.630423	1.18262	-0.3466
		6.18837	2.11579	0.713555	1.21813	-0.28419	5.99125	2.04331	0.4931	1.20391	-0.36549
		6.29621	2.0797	0.701124	1.23958	-0.29412	6.0319	2.03681	0.524369	1.22515	-0.38468
		6.38224	2.03774	0.700416	1.26098	-0.30422	6.07299	2.03099	0.690921	1.24635	-0.40419
		6.46754	2.00181	0.707264	1.28233	-0.31446	6.13575	2.03743	0.69632	1.26749	-0.42401
		6.53063	1.98496	0.706601	1.30364	-0.31288	6.19992	2.06699	0.681892	1.28858	-0.43742
		6.59283	1.99031	0.535667	1.32489	-0.26298	6.2873	2.1206	0.711824	1.30962	-0.42397
		6.65421	2.00853	0.367033	1.34611	-0.2001	6.37575	2.18878	0.717624	1.33061	-0.40331
		6.69487	2.0274	0.551316	1.3673	-0.13642	6.46438	2.26235	0.633428	1.35155	-0.38214
		6.73555	2.0349	0.71452	1.38847	-0.0722	6.59657	2.332	0.564915	1.37246	-0.36049
		6.79718	2.03018	0.713243	1.40963	-0.0077	6.76929	2.38441	0.674879	1.39332	-0.33843
		6.83901	2.02799	0.705629	1.43079	0.056807	6.93738	2.39672	0.72145	1.41416	-0.31599
		6.90292	2.03958	0.641666	1.45196	0.121077	7.08272	2.38533	0.712722	1.43497	-0.2932
		6.98967	2.07098	0.654001	1.47315	0.184845	7.18619	2.36804	0.710998	1.45575	-0.27011
		7.16233	2.11203	0.703177	1.49436	0.247846	7.2896	2.35471	0.714216	1.47651	-0.24675
		7.40872	2.08585	0.715166	1.51562	0.309807	7.37232	2.34865	0.71439	1.49725	-0.22315
		7.49016	2.05611	0.710742	1.53692	0.370445	7.47573	2.35165	0.713825	1.51797	-0.19934
		7.57176	2.05236	0.706106	1.55828	0.429464	7.57917	2.36591	0.712157	1.53867	-0.17536
		7.63335	2.08088	0.707608	1.57972	0.48656	7.68263	2.39072	0.711003	1.55936	-0.15122
		7.71616	2.13283	0.709667	1.60124	0.541419	7.80659	2.41966	0.712406	1.58004	-0.12696
		7.82015	2.1932	0.711923	1.62285	0.593717	7.93	2.44467	0.714414	1.60071	-0.1026
		8.02557	2.23324	0.714061	1.64458	0.64313	8.07309	2.45507	0.711523	1.62138	-0.07816
		8.22897	2.18837	0.713882	1.66644	0.689333	8.21555	2.449	0.708407	1.64203	-0.05366
		8.33116	2.12362	0.717365	1.68844	0.732008	8.31719	2.43544	0.707601	1.66269	-0.02912
		8.41279	2.06554	0.718773	1.7106	0.770855	8.41881	2.42204	0.713853	1.68335	-0.00457
		8.4942	2.02624	0.715854	1.73294	0.781529	8.52043	2.41302	0.717356	1.704	0.016636
		8.57552	2.00671	0.71358	1.75547	0.696194	8.64236	2.40719	0.678183	1.72466	0.024423
		8.69754	2.00069	0.707427	1.77819	0.593047	8.7643	2.40293	0.637987	1.74532	0.028854
		8.90254	1.98751	0.699725	1.80106	0.495851	8.90678	2.39604	0.667556	1.76598	0.033282
		9.04982	1.95455	0.696886	1.82406	0.403609	9.05005	2.38559	0.712559	1.78665	0.037706
		9.1787	1.92115	0.693898	1.84717	0.315333	9.21553	2.36977	0.712697	1.80732	0.042127
		9.30931	1.88871	0.694541	1.87035	0.230054	9.36264	2.34186	0.702379	1.82799	0.046544
		9.39672	1.85647	0.686318	1.89358	0.146814	9.51275	2.29263	0.706375	1.84866	0.050958
		9.50542	1.8209	0.646888	1.91683	0.064664	9.66702	2.21351	0.710738	1.86934	0.055367
		9.59137	1.7808	0.652194	1.94007	-0.01734	9.77986	2.11189	0.714206	1.89002	0.059771
		9.65501	1.73538	0.679202	1.96327	-0.10017	9.84737	2.01862	0.71332	1.91071	0.064171
		9.73867	1.6842	0.5742	1.9864	-0.1848	9.91376	1.95353	0.700813	1.93139	0.068566
		9.8007	1.62266	0.436037	2.00943	-0.27225	9.97848	1.93371	0.708322	1.95208	0.072956
		9.88275	1.55369	0.50032	2.03232	-0.36359	10.0415	1.96259	0.602605	1.97278	0.07734
		9.96432	1.49059	0.669196	2.05506	-0.45992	10.0827	2.01788	0.433805	1.99348	0.081718
		10.0456	1.44697	0.677415	2.07762	-0.56244	10.1033	2.07446	0.472218	2.01418	0.08609
		10.1267	1.43627	0.67348	2.09996	-0.67239	10.1446	2.10422	0.379685	2.03489	0.090455
		10.2077	1.46298	0.679684	2.12206	-0.79108	10.1864	2.10124	0.488914	2.0556	0.094813
		10.289	1.5193	0.66761	2.14391	-0.91984	10.2506	2.0857	0.649927	2.07631	0.099163
		10.3707	1.59638	0.520431	2.16549	-1.06002	10.2945	2.07774	0.718139	2.09703	0.103506
		10.4534	1.68543	0.405636	2.18677	-1.19382	10.3617	2.0952	0.724064	2.11776	0.111162
		10.5163	1.77883	0.521231	2.20775	-1.25861	10.4526	2.14154	0.699561	2.13849	0.132067
		10.6014	1.87077	0.715205	2.22846	-1.3024	10.5431	2.20516	0.690999	2.15923	0.156171
		10.666	1.95605	0.726024	2.24891	-1.34269	10.6525	2.27251	0.706556	2.17998	0.180111
		10.7314	2.03071	0.720827	2.26913	-1.37883	10.7592	2.33596	0.7183	2.20074	0.20385
		10.7974	2.09397	0.718694	2.28915	-1.41019	10.8654	2.39263	0.723196	2.22152	0.227349
		10.864	2.14947	0.716188	2.30899	-1.43621	10.9953	2.44133	0.71887	2.24233	0.250568
		10.9313	2.2011	0.712536	2.32868	-1.45639	11.1072	2.48137	0.712649	2.26316	0.273466
		10.9994	2.252	0.715306	2.34825	-1.47036	11.2211	2.51228	0.711802	2.28402	0.296001
		11.0918	2.30417	0.713222	2.36772	-1.47781	11.3582	2.5344	0.710815	2.30491	0.318127
		11.1861	2.35946	0.712936	2.38712	-1.47861	11.493	2.55158	0.713132	2.32585	0.339799
		11.2821	2.41758	0.713949	2.40647	-1.47273	11.6247	2.5682	0.712158	2.34682	0.360971
		11.4292	2.47532	0.71289	2.4258	-1.46027	11.7541	2.59082	0.67988	2.36784	0.381593
		11.5785	2.52516	0.712337	2.44514	-1.44147	11.8822	2.62308	0.682048	2.38891	0.401616
		11.7506	2.56768	0.710826	2.4645	-1.41667	12.0095	2.663	0.710822	2.41004	0.420991
		11.9601	2.59757	0.708392	2.48392	-1.38634	12.1358	2.7054	0.718236	2.43124	0.439667
		12.1552	2.61676	0.713796	2.50342	-1.35099	12.2816	2.74394	0.713365	2.4525	0.457594
		12.2818	2.65216	0.716687	2.52302	-1.31122	12.4257	2.77155	0.715657	2.47383	0.474722
		12.3661	2.70474	0.715039	2.54274	-1.26767	12.5687	2.78674	0.718276	2.49525	0.491002
		12.4717	2.76149	0.712932	2.5626	-1.22097	12.7111	2.7897	0.71983	2.51675	0.506385
		12.5981	2.80237	0.713847	2.58263	-1.16013	12.833	2.78172	0.717059	2.53835	0.51689
		12.7445	2.81549	0.717777	2.60284	-1.05373	12.9549	2.7667	0.711889	2.56004	0.51119
		12.8892	2.80163	0.720638	2.62322	-0.94141	13.0566	2.75093	0.711634	2.58184	0.501857
		12.992	2.77553	0.718385	2.64379	-0.83513	13.1582	2.73924	0.711285	2.60373	0.492905
		13.0947	2.75266	0.713359	2.66452	-0.73454	13.2802	2.73079	0.715137	2.62572	0.484322
		13.1976	2.74395	0.714192	2.68541	-0.63921	13.4432	2.71873	0.71915	2.6478	0.476099
		13.3005	2.75245	0.71062	2.70644	-0.54863	13.6284	2.69053	0.714428	2.66997	0.468226
		13.4441	2.77137	0.712613	2.72761	-0.46227	13.7535	2.65431	0.717894	2.69224	0.460694
		13.6879	2.7746	0.713025	2.7489	-0.37957	13.8797	2.62737	0.712156	2.71459	0.453493
		13.8719	2.75442	0.714601	2.77029	-0.29996	13.9851	2.61581	0.713483	2.73704	0.446614
		13.9957	2.7342	0.713971	2.79177	-0.22287	14.112	2.61335	0.714837	2.75956	0.440047
		14.1202	2.71866	0.711119	2.81333	-0.14775	14.262	2.60326	0.713697	2.78217	0.433786
		14.2452	2.70262	0.707332	2.83493	-0.07403	14.4386	2.56344	0.711761	2.80486	0.42782
		14.3708	2.68285	0.708305	2.85657	-0.00117	14.5974	2.49536	0.710456	2.82763	0.422143
		14.4969	2.66012	0.709782	2.87823	0.071375	14.7337	2.41749	0.70763	2.85047	0.416746
		14.6244	2.63639	0.710717	2.89989	0.144144	14.8455	2.34108	0.711306	2.87339	0.411623
		14.7543	2.61417	0.710419	2.92154	0.217666	14.9995	2.26976	0.700525	2.89638	0.406765
		14.8877	2.59451	0.711689	2.94315	0.292466	15.134	2.19665	0.688566	2.91945	0.402167
		15.0695	2.56749	0.712447	2.96471	0.369062	15.3004	2.11283	0.68755	2.94258	0.397822
		15.3453	2.49321	0.709572	2.9862	0.447965	15.4258	2.02914	0.707992	2.96577	0.393723
		15.4848	2.3711	0.708678	3.00761	0.515947	15.501	1.96379	0.716008	2.98902	0.373261
		15.5774	2.25619	0.713579	3.02892	0.530789	15.5985	1.92105	0.720624	3.01234	0.287478
		15.6459	2.16463	0.706452	3.05014	0.531679	15.6683	1.89401	0.524775	3.03568	0.186952
		15.7136	2.10823	0.697834	3.07128	0.532117	15.7129	1.86691	0.522973	3.05904	0.087474
		15.7806	2.09717	0.712335	3.09233	0.532101	15.7559	1.819	0.621602	3.08238	-0.01196
		15.8248	2.12942	0.712996	3.11331	0.531629	15.8183	1.74135	0.407786	3.10568	-0.11238
		15.8903	2.18534	0.671713	3.13422	0.530699	15.8593	1.64956	0.576954	3.12891	-0.21484
		15.9334	2.24515	0.683328	3.15506	0.529313	15.9206	1.56419	0.696075	3.15204	-0.32041
		15.9759	2.28483	0.714704	3.17583	0.527472	16.0025	1.50149	0.684743	3.17505	-0.4302
		16.0179	2.29253	0.533584	3.19655	0.525181	16.1263	1.45977	0.661923	3.19792	-0.54532
		16.0595	2.27269	0.367996	3.21722	0.522445	16.272	1.40661	0.664568	3.22061	-0.66687
		16.1008	2.2318	0.631263	3.23783	0.519271	16.355	1.37102	0.697985	3.24312	-0.79594
		16.1421	2.17705	0.717857	3.25841	0.515666	16.4164	1.38467	0.698426	3.26541	-0.9335
		16.1836	2.12049	0.621426	3.27894	0.51164	16.4768	1.45065	0.631303	3.28749	-1.08042
		16.2258	2.0793	0.621689	3.29944	0.507203	16.5369	1.54958	0.515919	3.30934	-1.23731
		16.2688	2.06936	0.703634	3.3199	0.502368	16.5773	1.65515	0.379755	3.33094	-1.40441
		16.3352	2.10042	0.712294	3.34034	0.497145	16.6186	1.74148	0.45808	3.35231	-1.58141
		16.4265	2.17221	0.70583	3.36076	0.49155	16.6609	1.80106	0.46657	3.37344	-1.76726
		16.5195	2.26906	0.70981	3.38116	0.485596	16.7267	1.84678	0.721377	3.39435	-1.95996
		16.747	2.35355	0.71289	3.40154	0.479299	16.795	1.89258	0.720095	3.41505	-2.15628
		16.9014	2.39677	0.715034	3.42191	0.470475	16.8894	1.94581	0.68871	3.43557	-2.30701
		17.0325	2.4252	0.710061	3.44227	0.452576	16.9858	2.00951	0.697305	3.45595	-2.26838
		17.163	2.45397	0.71086	3.46263	0.432297	17.1061	2.07864	0.712646	3.47625	-2.16738
		17.2714	2.48654	0.712337	3.48299	0.41188	17.2486	2.1525	0.703702	3.49649	-2.05165
		17.3794	2.5234	0.716108	3.50334	0.391354	17.3886	2.23071	0.681874	3.51672	-1.92505
		17.487	2.56478	0.716707	3.52369	0.370744	17.5486	2.30543	0.681958	3.53697	-1.79117
		17.6154	2.60914	0.720725	3.54405	0.350075	17.7053	2.3659	0.699907	3.55727	-1.65318
		17.7634	2.64962	0.721637	3.5644	0.329365	17.8807	2.41163	0.711615	3.57764	-1.51369
		17.9499	2.66974	0.72158	3.58476	0.308631	18.0307	2.44224	0.711493	3.59809	-1.37477
		18.1537	2.65402	0.717918	3.60513	0.28789	18.1571	2.46015	0.706567	3.61863	-1.23793
		18.2959	2.6226	0.71323	3.62549	0.267152	18.2823	2.4716	0.702845	3.63926	-1.10421
		18.4385	2.59024	0.707285	3.64586	0.246428	18.4068	2.4817	0.704319	3.65999	-0.97423
		18.5817	2.5565	0.705719	3.66624	0.225724	18.5307	2.49291	0.708376	3.68081	-0.84824
		18.7685	2.51177	0.704484	3.68662	0.205048	18.6541	2.50521	0.708002	3.70173	-0.72623
		18.917	2.4532	0.699027	3.70701	0.184403	18.7771	2.51885	0.700688	3.72272	-0.60797
		19.0463	2.39178	0.696811	3.7274	0.16379	18.8996	2.53514	0.70182	3.74378	-0.49305
		19.1548	2.33254	0.693817	3.7478	0.143212	19.0016	2.55733	0.7068	3.76491	-0.38095
		19.2418	2.279	0.691145	3.76821	0.122667	19.1034	2.58629	0.714744	3.78607	-0.27105
		19.3502	2.23437	0.695896	3.78861	0.102153	19.2256	2.61732	0.715592	3.80726	-0.16268
		19.4363	2.20148	0.696228	3.80902	0.08167	19.3071	2.64687	0.716178	3.82846	-0.0551
		19.5216	2.18305	0.660775	3.82944	0.065474	19.3886	2.67252	0.716346	3.84966	0.039957
		19.6059	2.18138	0.660721	3.84986	0.066341	19.4703	2.69409	0.712979	3.87084	0.085453
		19.6893	2.19589	0.684914	3.87028	0.071476	19.5523	2.71665	0.711553	3.89199	0.118733
		19.7933	2.21969	0.689972	3.8907	0.07662	19.6348	2.74508	0.711515	3.91311	0.152296
		19.9402	2.23879	0.704137	3.91112	0.081772	19.697	2.78013	0.709292	3.93421	0.186181
		20.114	2.2273	0.695777	3.93155	0.086935	19.801	2.82167	0.705502	3.95527	0.220425
		20.2487	2.19137	0.585538	3.95197	0.09211	19.9049	2.86937	0.707396	3.97629	0.255061
		20.3842	2.15092	0.584265	3.97239	0.097299	20.0702	2.91675	0.708241	3.99728	0.290119
		20.4954	2.11799	0.69754	3.99282	0.102502	20.254	2.9561	0.702486	4.01823	0.325622
		20.6048	2.0938	0.711855	4.01323	0.107721	20.4569	2.98062	0.682133	4.03913	0.361589
		20.7584	2.06687	0.698593	4.03365	0.112957	20.81	2.96356	0.65752	4.06	0.39803
		20.8946	2.02301	0.693042	4.05406	0.118212	21.0354	2.8899	0.626509	4.08082	0.434948
		21.0133	1.95866	0.697477	4.07447	0.123486	21.1992	2.80993	0.685993	4.10159	0.472336
		21.134	1.88463	0.715141	4.09488	0.128781	21.34	2.73254	0.717801	4.12232	0.510176
		21.2059	1.80468	0.674811	4.11527	0.134097	21.4332	2.65374	0.707703	4.143	0.548436
		21.2763	1.71729	0.526942	4.13567	0.139436	21.5488	2.56904	0.698878	4.16365	0.587073
		21.3447	1.61743	0.579041	4.15605	0.144799	21.6407	2.47201	0.705689	4.18424	0.626026
		21.4107	1.50986	0.474965	4.17643	0.150185	21.7092	2.36098	0.710926	4.2048	0.665218
		21.4746	1.41128	0.563858	4.19681	0.155597	21.7774	2.2464	0.708684	4.22532	0.704555
		21.5369	1.33966	0.659279	4.21717	0.161035	21.8453	2.13706	0.70369	4.2458	0.743922
		21.5983	1.31381	0.670128	4.23753	0.167964	21.9354	2.04064	0.696381	4.26625	0.768871
		21.6594	1.33749	0.68688	4.25788	0.180733	22.0025	1.96313	0.70459	4.28667	0.736017
		21.7003	1.39285	0.512558	4.27822	0.194843	22.0913	1.90415	0.724594	4.30707	0.687935
		21.7624	1.45949	0.467842	4.29857	0.208787	22.1791	1.86445	0.714119	4.32745	0.639098
		21.8259	1.51861	0.617341	4.31891	0.222535	22.2658	1.84281	0.511406	4.34782	0.589688
		21.8911	1.56414	0.609497	4.33927	0.236058	22.395	1.83127	0.523623	4.36819	0.53986
		21.9802	1.60486	0.706868	4.35965	0.249326	22.5473	1.81381	0.663715	4.38855	0.489746
		22.0707	1.64906	0.696296	4.38004	0.262309	22.7293	1.76295	0.69058	4.40891	0.439449
		22.1831	1.69926	0.664452	4.40045	0.274979	22.8221	1.716	0.697638	4.42927	0.389053
		22.3347	1.74113	0.660236	4.42089	0.287307	22.9127	1.69641	0.677663	4.44963	0.338619
		22.4803	1.76474	0.69319	4.44137	0.299264	22.9779	1.70111	0.591209	4.46999	0.288191
		22.6036	1.776	0.703827	4.46188	0.310823	23.0199	1.71809	0.432066	4.49036	0.237796
		22.7069	1.7804	0.69141	4.48243	0.321957	23.0609	1.72932	0.457653	4.51073	0.187449
		22.8316	1.77862	0.677391	4.50303	0.33264	23.1013	1.72611	0.528417	4.53111	0.137151
		22.9564	1.77138	0.687051	4.52369	0.342847	23.1618	1.71624	0.706824	4.55148	0.086896
		23.0804	1.75828	0.706321	4.54441	0.352555	23.2027	1.70885	0.687492	4.57186	0.036672
		23.2033	1.74412	0.618459	4.56519	0.361743	23.2651	1.71247	0.698806	4.59223	-0.01354
		23.3054	1.74231	0.485135	4.58604	0.37039	23.3501	1.72989	0.661772	4.61261	-0.06375
		23.3872	1.75913	0.624251	4.60697	0.378477	23.4572	1.75591	0.652368	4.63299	-0.11399
		23.4695	1.79874	0.705334	4.62798	0.385988	23.6247	1.76762	0.682773	4.65336	-0.16427
		23.5317	1.86134	0.637345	4.64908	0.390597	23.7682	1.76471	0.708316	4.67373	-0.19895
		23.6155	1.94071	0.454242	4.67027	0.385949	23.8902	1.76027	0.707525	4.6941	-0.1711
		23.7003	2.02624	0.604095	4.69154	0.379901	24.0324	1.75567	0.695602	4.71447	-0.12757
		23.7858	2.10677	0.714574	4.71288	0.374842	24.1544	1.7478	0.691692	4.73483	-0.08401
		23.872	2.17165	0.708607	4.73428	0.370734	24.2767	1.73224	0.690888	4.7552	-0.04043
		23.9587	2.2178	0.702653	4.75572	0.367547	24.3994	1.70865	0.696567	4.77556	0.003156
		24.0457	2.25237	0.70244	4.77719	0.365256	24.502	1.68253	0.701063	4.79592	0.046752
		24.1548	2.28193	0.703357	4.79868	0.363847	24.6255	1.66093	0.69349	4.81628	0.090351
		24.2642	2.31486	0.698467	4.82019	0.36331	24.7284	1.64885	0.681012	4.83664	0.133946
		24.3518	2.35507	0.701926	4.84168	0.363642	24.8315	1.64652	0.67994	4.85701	0.177528
		24.4613	2.40144	0.709091	4.86316	0.364846	24.9349	1.6445	0.674678	4.87737	0.221081
		24.5921	2.45114	0.682603	4.8846	0.366935	25.0596	1.63189	0.569808	4.89773	0.264586
		24.7214	2.50002	0.652001	4.90601	0.369924	25.1644	1.59905	0.479423	4.9181	0.308013
		24.8697	2.54081	0.672573	4.92736	0.37384	25.2484	1.55402	0.482678	4.93847	0.351326
		25.0362	2.56751	0.705728	4.94864	0.378714	25.3314	1.51886	0.560679	4.95884	0.394474
		25.2003	2.57595	0.712498	4.96984	0.384587	25.3928	1.5118	0.656533	4.97923	0.437399
		25.3632	2.56632	0.706714	4.99094	0.391507	25.4535	1.54812	0.685725	4.99962	0.480027
		25.4851	2.54691	0.704711	5.01195	0.399533	25.4941	1.624	0.687909	5.02002	0.522268
		25.607	2.52375	0.709196	5.03283	0.408734	25.535	1.71839	0.67666	5.04045	0.564021
		25.7288	2.49924	0.709165	5.05358	0.41919	25.5768	1.80638	0.487006	5.06089	0.605165
		25.8306	2.47205	0.706743	5.0742	0.43057	25.6416	1.86418	0.62823	5.08135	0.63382
		25.953	2.44427	0.701972	5.09466	0.440665	25.7088	1.89094	0.725785	5.10185	0.615003
		26.0555	2.42018	0.700513	5.11499	0.448935	25.8011	1.90895	0.718199	5.12237	0.5845
		26.1789	2.40201	0.700573	5.13521	0.455435	25.9401	1.92762	0.712816	5.14294	0.554168
		26.3228	2.38543	0.704191	5.15534	0.460059	26.2006	1.90638	0.710874	5.16353	0.524056
		26.5077	2.35779	0.709073	5.17541	0.462728	26.347	1.87174	0.704251	5.18416	0.494202
		26.6321	2.32024	0.708008	5.19544	0.463393	26.4508	1.85593	0.692451	5.20483	0.464635
		26.7371	2.28636	0.689627	5.21544	0.462033	26.5543	1.85661	0.692219	5.22553	0.435378
		26.8436	2.26142	0.674896	5.23545	0.458659	26.6578	1.86154	0.701875	5.24627	0.406444
		26.9736	2.24546	0.703146	5.25548	0.453312	26.7407	1.86459	0.627074	5.26705	0.377841
		27.1288	2.22267	0.710326	5.27555	0.446063	26.8446	1.86981	0.47117	5.28785	0.34957
		27.3369	2.15815	0.704764	5.2957	0.43701	26.9281	1.88065	0.537402	5.30869	0.321628
		27.4554	2.07552	0.694534	5.31593	0.426277	27.0327	1.89756	0.653356	5.32956	0.294004
		27.5245	2.01181	0.695459	5.33627	0.414006	27.1375	1.92009	0.675309	5.35046	0.266687
		27.5905	1.97245	0.707437	5.35675	0.400359	27.2422	1.94452	0.677246	5.37139	0.23966
		27.6325	1.95685	0.701371	5.37739	0.385511	27.3467	1.96734	0.687677	5.39235	0.212901
		27.673	1.9593	0.703585	5.3982	0.369643	27.4716	1.98614	0.696862	5.41332	0.18639
		27.7123	1.97217	0.434212	5.41922	0.352943	27.5755	2.00176	0.694747	5.43432	0.1601
		27.7318	1.98596	0.312519	5.44045	0.335597	27.6791	2.01723	0.694703	5.45533	0.134004
		27.7709	1.99197	0.563984	5.46193	0.317788	27.803	2.03495	0.700364	5.47636	0.108073
		27.811	1.98204	0.706905	5.48367	0.281774	27.9061	2.05775	0.703655	5.4974	0.087608
		27.8523	1.96041	0.698091	5.50569	0.17765	28.0293	2.08684	0.714455	5.51846	0.088526
		27.895	1.94717	0.688681	5.52795	0.06292	28.1522	2.12229	0.697419	5.53952	0.094752
		27.9616	1.95706	0.700775	5.5504	-0.04637	28.2746	2.16139	0.642181	5.56059	0.100948
		28.0538	1.9989	0.690716	5.57301	-0.15235	28.417	2.19995	0.628392	5.58168	0.10711
		28.1703	2.06764	0.646104	5.59573	-0.25698	28.5593	2.22944	0.67447	5.60278	0.113236
		28.3065	2.14099	0.652426	5.61851	-0.36207	28.7854	2.22931	0.711374	5.62389	0.119323
		28.4597	2.20337	0.686461	5.64132	-0.46935	29.001	2.17342	0.716458	5.64502	0.125369
		28.6705	2.23011	0.710874	5.6641	-0.58049	29.0895	2.10874	0.707941	5.66616	0.131372
		28.8362	2.22296	0.708652	5.68683	-0.69713	29.1551	2.05957	0.708594	5.68732	0.137328
		28.9394	2.21216	0.702441	5.70946	-0.82088	29.2193	2.02521	0.704324	5.70849	0.143235
		29.0426	2.21235	0.693372	5.73196	-0.95335	29.282	2.00217	0.716106	5.72969	0.14909
		29.1457	2.22886	0.694785	5.7543	-1.09605	29.323	1.9824	0.664841	5.7509	0.15489
		29.2486	2.25891	0.707396	5.77645	-1.25039	29.3636	1.96619	0.423146	5.77214	0.160633
		29.3514	2.29754	0.699447	5.79838	-1.41755	29.4043	1.96123	0.493506	5.79339	0.166315
		29.4744	2.33945	0.65392	5.82009	-1.59831	29.4659	1.97417	0.67325	5.81467	0.171934
		29.597	2.37577	0.639652	5.84156	-1.79286	29.5284	2.00927	0.696561	5.83597	0.177486
		29.78	2.39281	0.678754	5.86278	-2.00046	29.6127	2.06417	0.71014	5.8573	0.182968
		29.9637	2.37348	0.709092	5.88377	-2.21911	29.7182	2.1234	0.711653	5.87866	0.188378
		30.1081	2.33856	0.709977	5.90453	-2.44516	29.9042	2.15104	0.709987	5.90004	0.193711
		30.2117	2.30674	0.700607	5.9251	-2.62427	30.0269	2.15836	0.712831	5.92145	0.195347
		30.2946	2.28522	0.702765	5.94551	-2.59597	30.1087	2.16528	0.710845	5.94289	0.182532
		30.3979	2.2718	0.708282	5.96582	-2.49434	30.1907	2.18401	0.712536	5.96435	0.166261
		30.4803	2.26283	0.707717	5.98609	-2.37166	30.2934	2.21618	0.716049	5.98585	0.150156
		30.583	2.2543	0.702636	6.00636	-2.23331	30.4166	2.25497	0.668593	6.00736	0.134202
		30.6649	2.24492	0.704692	6.0267	-2.08446	30.62	2.27436	0.616389	6.0289	0.118384
		30.7466	2.23684	0.709988	6.04711	-1.92974	30.7833	2.25076	0.613112	6.05046	0.102688
		30.8693	2.2243	0.720926	6.06764	-1.77305	30.9065	2.21529	0.689597	6.07203	0.087098
		31.0551	2.19157	0.651471	6.08831	-1.61748	31.0092	2.18011	0.718126	6.09362	0.071599
		31.2037	2.12024	0.569508	6.10912	-1.46531	31.1119	2.14891	0.709593	6.11522	0.056176
		31.3112	2.04559	0.62267	6.13009	-1.31812	31.2355	2.1215	0.708421	6.13683	0.040812
		31.3968	1.98838	0.710209	6.15122	-1.17685	31.3603	2.09409	0.710202	6.15845	0.025491
		31.4603	1.96207	0.694768	6.17251	-1.04195	31.5302	2.0604	0.710881	6.18007	0.010197
		31.5437	1.96799	0.677641	6.19395	-0.91349	31.6831	2.01879	0.714192	6.20169	-0.00509
		31.6054	1.99031	0.713193	6.21555	-0.79122	31.8403	1.96394	0.715359	6.22331	-0.02037
		31.6666	2.01073	0.696868	6.23728	-0.6747	31.9313	1.89904	0.715292	6.24493	-0.03568
		31.7276	2.0102	0.598956	6.25913	-0.56332	32.0207	1.84208	0.68974	6.26654	-0.05103
		31.7886	1.98567	0.506737	6.28109	-0.4564	32.0854	1.79986	0.697016	6.28814	-0.06643
		31.8499	1.95503	0.410682	6.30313	-0.35314	32.127	1.77343	0.719277	6.30974	-0.08191
		31.9118	1.93748	0.493129	6.32524	-0.25274	32.1873	1.76049	0.43032	6.33132	-0.09746
		31.9746	1.94932	0.507639	6.3474	-0.16369	32.207	1.75561	0.443034	6.35288	-0.12508
		32.0594	1.99127	0.676119	6.36958	-0.11301	32.2461	1.75524	0.68332	6.37442	-0.20093
		32.1659	2.04928	0.718506	6.39178	-0.07202	32.2855	1.75926	0.596722	6.39593	-0.28987
		32.3546	2.09659	0.710498	6.41399	-0.03122	32.3258	1.76552	0.593262	6.4174	-0.38045
		32.5181	2.09183	0.713262	6.43621	0.00952	32.3888	1.77194	0.605981	6.43881	-0.47313
		32.6199	2.06938	0.711707	6.45842	0.050318	32.4549	1.78248	0.48663	6.46015	-0.56831
		32.7015	2.05134	0.707684	6.48061	0.091302	32.5238	1.8061	0.52091	6.48141	-0.66635
		32.7833	2.04871	0.701642	6.50279	0.132596	32.6179	1.84749	0.614156	6.50258	-0.76752
		32.8655	2.06507	0.707665	6.52494	0.174326	32.7584	1.90055	0.660379	6.52366	-0.87199
		32.9482	2.0987	0.706674	6.54705	0.216611	32.8955	1.95892	0.670209	6.54463	-0.97979
		33.0312	2.14495	0.691994	6.56912	0.259572	33.0089	2.01949	0.679678	6.56551	-1.09079
		33.1355	2.19882	0.696241	6.59114	0.303321	33.1234	2.08028	0.688747	6.58628	-1.20462
		33.219	2.25446	0.706054	6.61311	0.347969	33.2165	2.13643	0.690877	6.60696	-1.32068
		33.344	2.30667	0.709695	6.63502	0.393615	33.3345	2.18607	0.695552	6.62754	-1.43805
		33.4887	2.34988	0.707059	6.65686	0.440353	33.4531	2.23168	0.699686	6.64805	-1.55547
		33.6723	2.36972	0.706377	6.67863	0.488261	33.5708	2.27594	0.698018	6.66849	-1.67133
		33.8349	2.36545	0.708271	6.70032	0.537404	33.7092	2.32005	0.699937	6.68887	-1.78363
		33.9776	2.35022	0.703794	6.72193	0.58783	33.8441	2.36539	0.704726	6.70924	-1.89003
		34.1004	2.32857	0.704932	6.74347	0.639563	33.9977	2.41048	0.708598	6.7296	-1.98791
		34.2451	2.29654	0.716545	6.76492	0.692601	34.1269	2.45395	0.70803	6.75	-2.07447
		34.4134	2.24859	0.675897	6.78628	0.732313	34.2752	2.4947	0.709939	6.77048	-2.09986
		34.5205	2.1889	0.603133	6.80756	0.713696	34.4213	2.53227	0.715183	6.79106	-1.92751
		34.6281	2.13093	0.592704	6.82876	0.678964	34.5658	2.56607	0.720059	6.81179	-1.71006
		34.7353	2.08399	0.696794	6.8499	0.642727	34.6887	2.60023	0.722171	6.83267	-1.49893
		34.82	2.05446	0.709341	6.87097	0.605155	34.7909	2.64112	0.731055	6.85371	-1.29625
		34.9038	2.04222	0.697598	6.892	0.566414	34.8931	2.69058	0.73054	6.87491	-1.10291
		35.0302	2.0306	0.691707	6.91298	0.526654	35.0156	2.74476	0.72547	6.89626	-0.91894
		35.2529	1.97806	0.695656	6.93392	0.486016	35.1582	2.78856	0.720988	6.91775	-0.74368
		35.3746	1.87202	0.70221	6.95482	0.444627	35.4023	2.7843	0.720564	6.93936	-0.57604
		35.4721	1.7598	0.700968	6.97569	0.4026	35.5465	2.73549	0.720744	6.96107	-0.41463
		35.5421	1.66362	0.661703	6.99654	0.360037	35.629	2.68059	0.723049	6.98285	-0.25787
		35.6078	1.60214	0.688123	7.01737	0.317025	35.7112	2.63464	0.721054	7.00467	-0.10407
		35.6487	1.59266	0.713445	7.03817	0.273642	35.7931	2.6066	0.717124	7.02652	0.048525
		35.6874	1.63839	0.63097	7.05896	0.229955	35.8747	2.59363	0.715167	7.04836	0.201681
		35.7243	1.71217	0.527973	7.07974	0.186021	36.0178	2.58276	0.717126	7.07016	0.357164
		35.7425	1.77748	0.406104	7.1005	0.141888	36.247	2.53766	0.720296	7.0919	0.516693
		35.7789	1.80061	0.458608	7.12125	0.0976	36.398	2.44898	0.72074	7.11355	0.681894
		35.816	1.78145	0.682796	7.142	0.053194	36.5078	2.34708	0.715504	7.13508	0.854237
		35.8739	1.7536	0.58662	7.16274	0.008704	36.5961	2.25288	0.710007	7.15648	1.03494
		35.9565	1.748	0.572689	7.18347	-0.03584	36.6841	2.18606	0.70698	7.17774	1.22483
		36.0447	1.77966	0.724167	7.2042	-0.0723	36.7704	2.16846	0.709283	7.19884	1.37587
		36.1612	1.83791	0.718355	7.22494	-0.07635	36.8128	2.20103	0.719197	7.21978	1.33549
		36.2825	1.90715	0.682976	7.24566	-0.0723	36.8752	2.26013	0.461473	7.2406	1.23874
		36.3821	1.98562	0.657705	7.26639	-0.06824	36.9161	2.31708	0.368051	7.2613	1.13441
		36.4834	2.06861	0.631183	7.28712	-0.06418	36.9568	2.33986	0.421968	7.28192	1.02399
		36.5601	2.15502	0.452466	7.30785	-0.06011	36.9974	2.31998	0.59297	7.30248	0.908823
		36.6372	2.25222	0.458756	7.32857	-0.05605	37.0384	2.27889	0.702722	7.32299	0.790051
		36.7404	2.36077	0.699598	7.3493	-0.05198	37.08	2.23948	0.687177	7.34346	0.668636
		36.8432	2.4784	0.732175	7.37003	-0.04791	37.1439	2.22068	0.719343	7.3639	0.54535
		36.9701	2.59738	0.708168	7.39076	-0.04384	37.2097	2.23231	0.707725	7.38432	0.420788
		37.1901	2.69121	0.693167	7.41148	-0.03977	37.2771	2.26867	0.680349	7.40473	0.295398
		37.3329	2.75042	0.702975	7.43221	-0.03569	37.3691	2.32147	0.498165	7.42514	0.169509
		37.4519	2.80806	0.711677	7.45294	-0.03162	37.4853	2.38207	0.389424	7.44553	0.043363
		37.5239	2.87704	0.712187	7.47367	-0.02755	37.5782	2.44441	0.567755	7.46593	-0.08284
		37.5968	2.96208	0.71154	7.4944	-0.02348	37.7161	2.50722	0.740917	7.48633	-0.20893
		37.6707	3.06323	0.707466	7.51513	-0.01941	37.8286	2.56916	0.738266	7.50673	-0.33469
		37.7702	3.17638	0.703119	7.53587	-0.01533	37.9809	2.62684	0.714925	7.52715	-0.45987
		37.8702	3.29637	0.712095	7.5566	-0.01126	38.0873	2.686	0.685032	7.54758	-0.58408
		37.9697	3.41417	0.716608	7.57734	-0.0072	38.1935	2.75303	0.675718	7.56803	-0.70686
		38.1641	3.51295	0.718415	7.59808	-0.00313	38.2793	2.83107	0.704566	7.58851	-0.82754
		38.3514	3.57672	0.711685	7.61882	0.003794	38.3668	2.92108	0.734464	7.60903	-0.90654
		38.5107	3.61352	0.709092	7.63956	0.022143	38.4556	3.02016	0.711311	7.6296	-0.82903
		38.6666	3.63823	0.714197	7.6603	0.043358	38.545	3.12486	0.631471	7.65023	-0.71437
		38.7981	3.66231	0.712996	7.68104	0.064597	38.6785	3.22977	0.599665	7.67091	-0.60172
		38.9068	3.69644	0.712626	7.70177	0.08588	38.8521	3.32222	0.713369	7.69163	-0.49104
		39.0366	3.74411	0.711783	7.7225	0.107221	38.9793	3.40007	0.750859	7.7124	-0.38214
		39.1443	3.79754	0.710132	7.74323	0.128637	39.1056	3.47067	0.717587	7.7332	-0.27474
		39.294	3.84513	0.711007	7.76394	0.150143	39.1898	3.5356	0.688091	7.75403	-0.16846
		39.4419	3.87362	0.718559	7.78464	0.171754	39.2743	3.59271	0.694829	7.77487	-0.0629
		39.5675	3.88096	0.7199	7.80533	0.193481	39.3801	3.63938	0.735225	7.79572	0.042383
		39.6719	3.88197	0.718696	7.82601	0.215337	39.4861	3.67775	0.744062	7.81657	0.147853
		39.7557	3.88819	0.719714	7.84667	0.237331	39.5918	3.70968	0.731279	7.8374	0.253954
		39.8398	3.90849	0.719612	7.86732	0.259472	39.7183	3.73748	0.720325	7.85821	0.361108
		39.9246	3.94589	0.718541	7.88795	0.281765	39.8234	3.76606	0.726323	7.87898	0.46969
		40.0095	3.99512	0.712884	7.90855	0.304215	39.9284	3.80137	0.723138	7.89972	0.580003
		40.9659	3.45054	0.711902	7.92914	0.326823	40.0333	3.84897	0.719333	7.92041	0.692255
					7.94971	0.349588	40.1172	3.91431	0.728971	7.94104	0.806529
					7.97026	0.372504	40.2223	4.00239	0.739862	7.96163	0.922746
					7.99079	0.395564	40.3065	4.11838	0.729438	7.98216	1.04063
					8.0113	0.418756	40.3909	4.2671	0.718076	8.00264	1.15967
					8.03179	0.434442				8.02307	1.24488
					8.05226	0.419587				8.04346	1.19178
					8.07271	0.396861				8.06383	1.10164
					8.09315	0.373903				8.08419	1.0094
					8.11357	0.350745				8.10456	0.915856
					8.13398	0.32742				8.12492	0.821631
					8.15439	0.303953				8.1453	0.727214
					8.17478	0.280371				8.1657	0.632955
					8.19518	0.256692				8.18611	0.539085
					8.21556	0.232937				8.20654	0.445729
					8.23594	0.20912				8.22699	0.352923
					8.25632	0.185256				8.24745	0.260633
					8.27669	0.161354				8.26793	0.168769
					8.29707	0.137425				8.28841	0.077202
					8.31744	0.113475				8.30889	-0.01422
					8.33781	0.089511				8.32937	-0.10568
					8.35818	0.065538				8.34985	-0.19732
					8.37855	0.041559				8.37032	-0.28931
					8.39892	0.017577				8.39078	-0.38176
					8.41929	-0.00641				8.41122	-0.47474
					8.43966	-0.02273				8.43164	-0.54043
					8.46003	-0.00844				8.45205	-0.49482
					8.4804	0.013495				8.47245	-0.42085
					8.50077	0.035433				8.49283	-0.34647
					8.52114	0.057374				8.51321	-0.27181
					8.54151	0.079319				8.53359	-0.19697
					8.56188	0.101268				8.55396	-0.12202
					8.58225	0.123224				8.57433	-0.04702
					8.60262	0.145184				8.5947	0.02801
					8.62298	0.167149				8.61506	0.103022
					8.64335	0.189115				8.63544	0.177985
					8.66372	0.211079				8.65581	0.252854
					8.68409	0.233033				8.67619	0.327562
					8.70445	0.25497				8.69657	0.402019
					8.72482	0.276881				8.71696	0.476101
					8.74519	0.298753				8.73737	0.549641
					8.76556	0.320572				8.75779	0.622428
					8.78594	0.34232				8.77823	0.694199
					8.80631	0.363977				8.79871	0.764633
					8.8267	0.38552				8.81921	0.833351
					8.84709	0.403684				8.83977	0.882336
					8.86749	0.408752				8.86038	0.859501
					8.8879	0.410466				8.88105	0.819092
					8.90833	0.412066				8.90178	0.778991
					8.92876	0.413548				8.92258	0.739325
					8.94922	0.414911				8.94346	0.7002
					8.96969	0.416153				8.9644	0.661698
					8.99018	0.417272				8.98541	0.623882
					9.01069	0.418266				9.0065	0.586797
					9.03123	0.419133				9.02766	0.550472
					9.05179	0.419873				9.04889	0.514921
					9.07237	0.420483				9.0702	0.480147
					9.09299	0.420964				9.09156	0.446141
					9.11364	0.421313				9.113	0.412886
					9.13431	0.42153				9.1345	0.380356
					9.15503	0.421615				9.15606	0.34852
					9.17578	0.421568				9.17767	0.317339
					9.19656	0.421388				9.19934	0.286771
					9.21739	0.421075				9.22106	0.25677
					9.23826	0.420629				9.24282	0.227285
					9.25918	0.421659				9.26463	0.19534
					9.28014	0.428939				9.28646	0.152184
					9.30115	0.437578				9.30833	0.106605
					9.32221	0.445952				9.33022	0.06139
					9.34333	0.454046				9.35211	0.016388
					9.3645	0.461848				9.37401	-0.02856
					9.38573	0.469341				9.39591	-0.0736
					9.40702	0.476514				9.41779	-0.1189
					9.42837	0.483352				9.43965	-0.1646
					9.44979	0.489841				9.46148	-0.21086
					9.47129	0.495968				9.48327	-0.25783
					9.49285	0.501721				9.50502	-0.30564
					9.5145	0.507086				9.52671	-0.35443
					9.53622	0.512053				9.54835	-0.40434
					9.55803	0.51661				9.56992	-0.45548
					9.57992	0.520746				9.59142	-0.50795
					9.60191	0.524454				9.61284	-0.56184
					9.624	0.527723				9.63418	-0.61722
					9.64618	0.530547				9.65544	-0.67411
					9.66847	0.53292				9.67661	-0.73253
					9.69087	0.5101				9.69769	-0.78003
					9.71338	0.39022				9.71869	-0.77826
					9.73598	0.249971				9.73961	-0.763
					9.75863	0.112799				9.76045	-0.74659
					9.78131	-0.02299				9.78123	-0.72912
					9.80398	-0.15911				9.80194	-0.71066
					9.82661	-0.29727				9.82261	-0.69131
					9.84917	-0.43915				9.84322	-0.67114
					9.87164	-0.58643				9.86379	-0.65023
					9.89397	-0.74068				9.88433	-0.62866
					9.91616	-0.90339				9.90483	-0.60649
					9.93818	-1.0758				9.9253	-0.58381
					9.96001	-1.25882				9.94574	-0.56068
					9.98164	-1.45281				9.96616	-0.53715
					10.0031	-1.65738				9.98656	-0.51328
					10.0243	-1.87105				10.0069	-0.48913
					10.0453	-2.09094				10.0273	-0.46473
					10.0662	-2.31247				10.0477	-0.44014
					10.087	-2.52909				10.068	-0.41538
					10.1076	-2.73236				10.0883	-0.39048
					10.1282	-2.85608				10.1086	-0.37311
					10.1489	-2.72872				10.1289	-0.38614
					10.1696	-2.52993				10.1492	-0.40663
					10.1905	-2.325				10.1695	-0.42687
					10.2116	-2.12068				10.1898	-0.44684
					10.2328	-1.9219				10.2101	-0.46647
					10.2543	-1.73196				10.2304	-0.48573
					10.276	-1.55277				10.2508	-0.50456
					10.2979	-1.38516				10.2711	-0.52291
					10.32	-1.22915				10.2915	-0.54072
					10.3422	-1.08421				10.3119	-0.55793
					10.3647	-0.94944				10.3323	-0.57449
					10.3873	-0.8237				10.3528	-0.59034
					10.41	-0.70571				10.3733	-0.60542
					10.4328	-0.59409				10.3938	-0.61968
					10.4556	-0.48743				10.4144	-0.63306
					10.4785	-0.38428				10.4351	-0.64551
					10.5013	-0.28312				10.4558	-0.65698
					10.524	-0.1824				10.4766	-0.66742
					10.5466	-0.08044				10.4976	-0.67678
					10.5691	0.007508				10.5185	-0.68533
					10.5913	0.029847				10.5396	-0.69447
					10.6134	0.035454				10.5608	-0.70422
					10.6353	0.04115				10.5821	-0.71439
					10.6571	0.046897				10.6035	-0.72496
					10.6788	0.052654				10.6249	-0.73591
					10.7003	0.058377				10.6464	-0.7472
					10.7217	0.064025				10.668	-0.7588
					10.7431	0.069551				10.6897	-0.77067
					10.7644	0.074913				10.7115	-0.78277
					10.7857	0.080068				10.7333	-0.79506
					10.807	0.084975				10.7552	-0.8075
					10.8282	0.089596				10.7772	-0.82003
					10.8495	0.093897				10.7992	-0.83261
					10.8708	0.097845				10.8213	-0.84516
					10.8921	0.101413				10.8435	-0.85764
					10.9136	0.104581				10.8658	-0.86997
					10.9351	0.10733				10.8881	-0.88209
					10.9567	0.109648				10.9105	-0.89392
					10.9784	0.111529				10.933	-0.90539
					11.0003	0.11339				10.9555	-0.90215
					11.0223	0.116672				10.9782	-0.8418
					11.0445	0.120466				11.0009	-0.76774
					11.0669	0.124421				11.0238	-0.69459
					11.0893	0.128556				11.0468	-0.62267
					11.1119	0.132888				11.0698	-0.55219
					11.1345	0.137436				11.093	-0.48331
					11.1572	0.142221				11.1164	-0.4161
					11.18	0.147263				11.1398	-0.3506
					11.2029	0.152586				11.1633	-0.28678
					11.2258	0.158214				11.187	-0.22462
					11.2487	0.164173				11.2108	-0.16403
					11.2716	0.170492				11.2347	-0.10493
					11.2945	0.177203				11.2587	-0.04723
					11.3175	0.184339				11.2828	0.009173
					11.3404	0.191939				11.3071	0.064373
					11.3632	0.200041				11.3314	0.118464
					11.386	0.208692				11.3558	0.171527
					11.4088	0.217941				11.3803	0.223633
					11.4314	0.227842				11.4049	0.274836
					11.454	0.236607				11.4297	0.317865
					11.4765	0.238388				11.4544	0.3315
					11.4989	0.23819				11.4793	0.33865
					11.5212	0.237792				11.5042	0.346757
					11.5433	0.237191				11.5292	0.355862
					11.5655	0.236384				11.5541	0.366015
					11.5875	0.235371				11.5791	0.377273
					11.6094	0.23415				11.604	0.389704
					11.6313	0.232721				11.6289	0.403387
					11.6531	0.231085				11.6538	0.41841
					11.6749	0.229243				11.6786	0.434873
					11.6966	0.227194				11.7032	0.452889
					11.7182	0.224943				11.7278	0.472588
					11.7398	0.22249				11.7523	0.49411
					11.7614	0.219839				11.7766	0.517615
					11.7829	0.216993				11.8007	0.543283
					11.8043	0.213958				11.8247	0.57131
					11.8258	0.210736				11.8484	0.601916
					11.8472	0.207333				11.872	0.635347
					11.8686	0.203756				11.8954	0.67187
					11.8899	0.202231				11.9185	0.702302
					11.9113	0.209529				11.9414	0.695867
					11.9326	0.219143				11.9641	0.67724
					11.9539	0.228873				11.9866	0.655543
					11.9752	0.238727				12.0089	0.63087
					11.9964	0.248709				12.031	0.603341
					12.0176	0.258824				12.0529	0.573097
					12.0389	0.269076				12.0747	0.540299
					12.06	0.279469				12.0964	0.505125
					12.0812	0.290008				12.118	0.467764
					12.1023	0.300694				12.1394	0.428413
					12.1234	0.311531				12.1608	0.387277
					12.1444	0.322521				12.1821	0.344565
					12.1654	0.333666				12.2034	0.300487
					12.1864	0.344967				12.2246	0.255253
					12.2074	0.356424				12.2457	0.209071
					12.2283	0.368037				12.2669	0.16215
					12.2492	0.379805				12.288	0.114694
					12.27	0.391725				12.3091	0.066905
					12.2908	0.403796				12.3301	0.018982
					12.3116	0.413212				12.3513	-0.01756
					12.3323	0.411438				12.3724	-0.00878
					12.353	0.406693				12.3935	0.011254
					12.3737	0.401765				12.4146	0.031242
					12.3943	0.396662				12.4358	0.051215
					12.4149	0.39139				12.457	0.071201
					12.4355	0.385957				12.4781	0.091229
					12.456	0.380371				12.4993	0.111329
					12.4766	0.374639				12.5204	0.131528
					12.4971	0.368769				12.5416	0.151854
					12.5176	0.362768				12.5627	0.172334
					12.538	0.356643				12.5838	0.192993
					12.5585	0.350402				12.6049	0.213856
					12.5789	0.344051				12.6259	0.234947
					12.5994	0.337599				12.647	0.256289
					12.6198	0.331051				12.668	0.277903
					12.6402	0.324414				12.689	0.299807
					12.6606	0.317694				12.7099	0.32202
					12.681	0.310899				12.7309	0.344557
					12.7014	0.304034				12.7518	0.367431
					12.7217	0.295728				12.7726	0.382576
					12.7421	0.281855				12.7934	0.365443
					12.7625	0.266555				12.8142	0.339814
					12.7828	0.251215				12.8349	0.313764
					12.8032	0.235843				12.8557	0.287342
					12.8236	0.220447				12.8763	0.260592
					12.8439	0.205034				12.897	0.233555
					12.8643	0.189608				12.9177	0.206272
					12.8847	0.174175				12.9383	0.178777
					12.905	0.158737				12.9589	0.151104
					12.9254	0.143299				12.9795	0.123285
					12.9458	0.127861				13.0001	0.095349
					12.9662	0.112427				13.0207	0.067325
					12.9865	0.096995				13.0413	0.039239
					13.0069	0.081568				13.0618	0.011117
					13.0273	0.066145				13.0824	-0.01702
					13.0476	0.050726				13.103	-0.04513
					13.068	0.03531				13.1236	-0.07321
					13.0884	0.019896				13.1442	-0.10123
					13.1088	0.004484				13.1648	-0.12915
					13.1291	-0.00302				13.1854	-0.14437
					13.1495	0.021095				13.206	-0.10931
					13.1699	0.053117				13.2266	-0.06183
					13.1902	0.085133				13.2472	-0.01445
					13.2106	0.11714				13.2679	0.0329
					13.231	0.14913				13.2885	0.080289
					13.2514	0.181096				13.3091	0.127786
					13.2717	0.213026				13.3298	0.175458
					13.2921	0.244906				13.3504	0.223368
					13.3125	0.276717				13.371	0.27157
					13.3329	0.308436				13.3915	0.320108
					13.3533	0.340034				13.4121	0.369019
					13.3737	0.371477				13.4326	0.418321
					13.3941	0.402725				13.4531	0.468021
					13.4145	0.433732				13.4736	0.518104
					13.435	0.464443				13.4941	0.568534
					13.4554	0.494799				13.5145	0.619251
					13.4759	0.524731				13.5349	0.670168
					13.4964	0.554163				13.5553	0.721167
					13.5169	0.583015				13.5757	0.7721
					13.5375	0.600898				13.5961	0.809249
					13.558	0.577243				13.6164	0.791724
					13.5787	0.543508				13.6368	0.759979
					13.5993	0.510088				13.6571	0.727669
					13.6201	0.47702				13.6775	0.694928
					13.6408	0.444327				13.6979	0.661877
					13.6616	0.412024				13.7183	0.628626
					13.6824	0.380118				13.7387	0.595269
					13.7033	0.348608				13.7591	0.56189
					13.7242	0.317486				13.7795	0.528558
					13.7451	0.286737				13.8	0.495333
					13.7661	0.256343				13.8205	0.462262
					13.7871	0.226281				13.841	0.429382
					13.8081	0.196523				13.8615	0.396722
					13.8291	0.167039				13.8821	0.3643
					13.8502	0.137796				13.9027	0.332128
					13.8712	0.108758				13.9233	0.300211
					13.8923	0.079889				13.944	0.268546
					13.9134	0.051151				13.9647	0.237128
					13.9346	0.022503				13.9853	0.205943
					13.9557	0.004673				14.006	0.18081
					13.9768	0.0299				14.0268	0.179137
					13.9979	0.065823				14.0475	0.183308
					14.0191	0.101617				14.0683	0.18748
					14.0402	0.137225				14.0891	0.191652
					14.0614	0.172588				14.1098	0.195825
					14.0826	0.207643				14.1307	0.199998
					14.1038	0.242324				14.1515	0.204172
					14.1251	0.276562				14.1723	0.208346
					14.1463	0.310285				14.1932	0.212521
					14.1677	0.343415				14.2141	0.216696
					14.189	0.375869				14.2349	0.220871
					14.2104	0.407562				14.2559	0.225045
					14.2319	0.438402				14.2768	0.229218
					14.2535	0.468296				14.2977	0.233389
					14.2751	0.497144				14.3186	0.237558
					14.2967	0.524847				14.3396	0.241724
					14.3185	0.551301				14.3606	0.245885
					14.3404	0.576404				14.3816	0.250042
					14.3623	0.600053				14.4025	0.254192
					14.3844	0.612907				14.4236	0.257625
					14.4066	0.588485				14.4446	0.258134
					14.4289	0.55641				14.4656	0.257719
					14.4513	0.526025				14.4867	0.257073
					14.4738	0.497212				14.5078	0.256199
					14.4963	0.469858				14.5289	0.255099
					14.519	0.443849				14.5501	0.253779
					14.5417	0.419078				14.5713	0.252242
					14.5644	0.395443				14.5926	0.250494
					14.5872	0.372841				14.6139	0.248541
					14.6101	0.351176				14.6352	0.246388
					14.6329	0.330355				14.6567	0.244045
					14.6557	0.310286				14.6782	0.241516
					14.6786	0.290879				14.6998	0.238811
					14.7014	0.272048				14.7214	0.235939
					14.7242	0.253707				14.7431	0.232906
					14.7469	0.235769				14.765	0.229723
					14.7696	0.218149				14.7869	0.226398
					14.7922	0.20076				14.8089	0.222941
					14.8147	0.183514				14.831	0.219361
					14.8371	0.173385				14.8532	0.22294
					14.8594	0.191604				14.8755	0.255268
					14.8816	0.216787				14.8979	0.294438
					14.9037	0.241609				14.9205	0.333347
					14.9258	0.265856				14.9431	0.372135
					14.9478	0.289313				14.9657	0.410926
					14.9698	0.311772				14.9885	0.449827
					14.9918	0.333033				15.0112	0.488929
					15.0139	0.352907				15.0341	0.528303
					15.036	0.371222				15.0569	0.568004
					15.0581	0.387828				15.0799	0.608065
					15.0804	0.402595				15.1028	0.648498
					15.1028	0.41542				15.1257	0.68929
					15.1253	0.426226				15.1487	0.730404
					15.1479	0.434965				15.1717	0.771772
					15.1708	0.441618				15.1947	0.813298
					15.1938	0.446193				15.2178	0.85485
					15.2171	0.448725				15.2408	0.896265
					15.2406	0.449276				15.2639	0.93734
					15.2644	0.44793				15.287	0.977839
					15.2885	0.425974				15.3101	0.990383
					15.3129	0.331594				15.3332	0.894316
					15.3376	0.226377				15.3565	0.772371
					15.3625	0.127546				15.3797	0.652075
					15.3876	0.033054				15.403	0.533492
					15.4128	-0.05897				15.4263	0.416471
					15.438	-0.15028				15.4496	0.300691
					15.4633	-0.24257				15.4729	0.185702
					15.4885	-0.33752				15.4963	0.070964
					15.5137	-0.43682				15.5196	-0.04413
					15.5387	-0.54225				15.5428	-0.1602
					15.5635	-0.65567				15.5661	-0.27788
					15.5881	-0.77905				15.5892	-0.39777
					15.6124	-0.91451				15.6123	-0.52041
					15.6364	-1.06425				15.6353	-0.6462
					15.6601	-1.23052				15.6582	-0.77541
					15.6835	-1.4155				15.681	-0.90808
					15.7064	-1.62109				15.7037	-1.04395
					15.7289	-1.84858				15.7263	-1.1824
					15.7511	-2.09817				15.7488	-1.32237
					15.7728	-2.31302				15.7713	-1.4432
					15.7942	-2.30413				15.7936	-1.48851
					15.8153	-2.20911				15.8159	-1.51967
					15.8361	-2.08449				15.8381	-1.55653
					15.8568	-1.93542				15.8603	-1.59916
					15.8774	-1.76735				15.8823	-1.6476
					15.8979	-1.58548				15.9041	-1.70185
					15.9184	-1.39437				15.9259	-1.76184
					15.9389	-1.19779				15.9475	-1.8274
					15.9593	-0.99861				15.969	-1.89826
					15.9798	-0.79885				15.9904	-1.97396
					16.0004	-0.59978				16.0116	-2.05385
					16.0209	-0.40209				16.0328	-2.13705
					16.0415	-0.20601				16.0538	-2.22239
					16.0621	-0.01145				16.0746	-2.30838
					16.0828	0.181783				16.0955	-2.3932
					16.1034	0.373915				16.1162	-2.47474
					16.1241	0.565033				16.1369	-2.55056
					16.1448	0.754955				16.1576	-2.61803
					16.1656	0.943109				16.1783	-2.6744
					16.1864	1.06574				16.199	-2.67248
					16.2072	0.936572				16.2199	-2.47913
					16.228	0.74758				16.2409	-2.23467
					16.2489	0.561669				16.2621	-1.99163
					16.2698	0.378178				16.2836	-1.75599
					16.2908	0.196099				16.3053	-1.53147
					16.3117	0.014187				16.3272	-1.31993
					16.3326	-0.16893				16.3494	-1.12189
					16.3534	-0.35467				16.3718	-0.93688
					16.3742	-0.54437				16.3944	-0.76378
					16.3949	-0.73921				16.4172	-0.60109
					16.4154	-0.94004				16.4402	-0.44709
					16.4359	-1.14725				16.4633	-0.29993
					16.4563	-1.36053				16.4865	-0.15773
					16.4766	-1.57868				16.5098	-0.0186
					16.4968	-1.79931				16.5331	0.119323
					16.517	-2.01864				16.5564	0.257859
					16.537	-2.23138				16.5797	0.398796
					16.5571	-2.43067				16.603	0.543854
					16.5772	-2.60842				16.6261	0.69466
					16.5974	-2.70034				16.6491	0.821658
					16.6177	-2.54481				16.672	0.828519
					16.6383	-2.32814				16.6947	0.802489
					16.6591	-2.11415				16.7174	0.774149
					16.6802	-1.90776				16.7399	0.743696
					16.7015	-1.71211				16.7623	0.711323
					16.7232	-1.529				16.7847	0.677225
					16.7452	-1.35912				16.807	0.641591
					16.7675	-1.20238				16.8292	0.604599
					16.79	-1.05818				16.8513	0.566421
					16.8129	-0.9256				16.8734	0.52721
					16.836	-0.80351				16.8955	0.487112
					16.8594	-0.69071				16.9175	0.446254
					16.8829	-0.58595				16.9395	0.404751
					16.9067	-0.48802				16.9614	0.362702
					16.9306	-0.39573				16.9834	0.320194
					16.9546	-0.30792				17.0053	0.277301
					16.9788	-0.22349				17.0271	0.234084
					17.0029	-0.14137				17.049	0.190595
					17.0272	-0.06049				17.0708	0.146877
					17.0514	0.010602				17.0927	0.110243
					17.0755	0.043764				17.1145	0.102621
					17.0997	0.067626				17.1363	0.102271
					17.1237	0.091772				17.1581	0.101924
					17.1478	0.116233				17.1798	0.101578
					17.1717	0.141037				17.2016	0.101234
					17.1956	0.166213				17.2233	0.100891
					17.2195	0.191788				17.2451	0.100551
					17.2432	0.217787				17.2668	0.100212
					17.267	0.244234				17.2885	0.099876
					17.2906	0.271149				17.3102	0.099541
					17.3142	0.298551				17.3318	0.099208
					17.3377	0.326452				17.3535	0.098877
					17.3611	0.354862				17.3752	0.098547
					17.3844	0.383783				17.3968	0.09822
					17.4077	0.413215				17.4184	0.097894
					17.4309	0.443145				17.44	0.097571
					17.454	0.473557				17.4615	0.097249
					17.4771	0.504422				17.4831	0.096929
					17.5001	0.535703				17.5047	0.096611
					17.523	0.561056				17.5262	0.100848
					17.5458	0.561339				17.5477	0.123376
					17.5686	0.555194				17.5692	0.15067
					17.5913	0.548921				17.5907	0.178229
					17.614	0.542536				17.6121	0.206096
					17.6365	0.536053				17.6335	0.234311
					17.6591	0.529486				17.6549	0.262913
					17.6815	0.522849				17.6762	0.291938
					17.7039	0.516155				17.6975	0.321419
					17.7262	0.509414				17.7187	0.351385
					17.7485	0.50264				17.7399	0.381861
					17.7707	0.495842				17.7611	0.412867
					17.7928	0.489031				17.7822	0.444417
					17.8149	0.482215				17.8032	0.476518
					17.8369	0.475404				17.8242	0.509171
					17.8589	0.468605				17.8451	0.542366
					17.8807	0.461826				17.866	0.576084
					17.9026	0.455073				17.8868	0.610294
					17.9243	0.448352				17.9076	0.644955
					17.946	0.441668				17.9283	0.680009
					17.9676	0.434468				17.949	0.706705
					17.9891	0.424895				17.9696	0.698507
					18.0106	0.414336				17.9902	0.680874
					18.032	0.403328				18.0107	0.662497
					18.0533	0.391893				18.0312	0.643447
					18.0746	0.380052				18.0516	0.623795
					18.0959	0.367829				18.0721	0.603607
					18.117	0.355243				18.0925	0.582948
					18.1382	0.342317				18.1129	0.561878
					18.1593	0.329072				18.1333	0.540455
					18.1803	0.315528				18.1537	0.518732
					18.2014	0.301706				18.1741	0.496758
					18.2223	0.287627				18.1944	0.474578
					18.2433	0.273308				18.2148	0.452234
					18.2642	0.258768				18.2351	0.429762
					18.2851	0.244025				18.2555	0.407196
					18.306	0.229098				18.2759	0.384563
					18.3268	0.214001				18.2962	0.361889
					18.3477	0.19875				18.3166	0.339195
					18.3685	0.183362				18.337	0.316499
					18.3893	0.171				18.3574	0.300542
					18.4101	0.171172				18.3777	0.311467
					18.4308	0.174503				18.3981	0.329034
					18.4516	0.177847				18.4185	0.346495
					18.4723	0.181206				18.4389	0.363833
					18.493	0.184578				18.4594	0.381027
					18.5138	0.187963				18.4798	0.398056
					18.5344	0.191361				18.5003	0.414895
					18.5551	0.194772				18.5207	0.43152
					18.5758	0.198194				18.5412	0.447902
					18.5965	0.201627				18.5617	0.464014
					18.6171	0.205072				18.5822	0.479823
					18.6377	0.208526				18.6028	0.495297
					18.6583	0.21199				18.6234	0.510403
					18.6789	0.215463				18.644	0.525104
					18.6995	0.218943				18.6646	0.539366
					18.7201	0.222431				18.6853	0.55315
					18.7406	0.225925				18.7061	0.566418
					18.7612	0.229424				18.7269	0.579133
					18.7817	0.232928				18.7477	0.591256
					18.8022	0.234222				18.7686	0.595246
					18.8227	0.226642				18.7896	0.569042
					18.8432	0.216788				18.8106	0.535838
					18.8637	0.206876				18.8317	0.503226
					18.8842	0.196911				18.8528	0.471218
					18.9047	0.186898				18.874	0.439818
					18.9251	0.176842				18.8953	0.409019
					18.9456	0.166746				18.9166	0.37881
					18.966	0.156616				18.938	0.349172
					18.9865	0.146454				18.9594	0.320081
					19.0069	0.136264				18.9809	0.29151
					19.0273	0.12605				19.0024	0.263426
					19.0478	0.115814				19.024	0.235794
					19.0682	0.105559				19.0456	0.208576
					19.0886	0.095287				19.0673	0.181732
					19.109	0.085001				19.089	0.155221
					19.1294	0.074704				19.1107	0.128999
					19.1498	0.064396				19.1324	0.103022
					19.1702	0.054079				19.1542	0.077244
					19.1907	0.043756				19.1759	0.05162
					19.2111	0.030536				19.1977	0.026302
					19.2315	0.005746				19.2195	0.001844
					19.2519	-0.02194				19.2413	-0.0224
					19.2723	-0.04961				19.2631	-0.04669
					19.2927	-0.07727				19.2848	-0.07106
					19.3131	-0.1049				19.3066	-0.09556
					19.3335	-0.13249				19.3284	-0.12024
					19.354	-0.16004				19.3501	-0.14515
					19.3744	-0.18752				19.3718	-0.17033
					19.3948	-0.21493				19.3934	-0.19583
					19.4152	-0.24223				19.4151	-0.2217
					19.4357	-0.26942				19.4367	-0.24798
					19.4561	-0.29646				19.4582	-0.27471
					19.4766	-0.32333				19.4797	-0.30193
					19.4971	-0.34999				19.5012	-0.32968
					19.5176	-0.37642				19.5226	-0.35799
					19.5381	-0.40256				19.5439	-0.3869
					19.5586	-0.42837				19.5652	-0.41643
					19.5792	-0.45381				19.5864	-0.44661
					19.5998	-0.47882				19.6076	-0.47746
					19.6204	-0.49118				19.6286	-0.49344
					19.641	-0.45481				19.6497	-0.4469
					19.6617	-0.40678				19.6706	-0.38319
					19.6824	-0.35929				19.6915	-0.31804
					19.7032	-0.31232				19.7124	-0.25173
					19.724	-0.26584				19.7333	-0.18457
					19.7448	-0.21979				19.7541	-0.11681
					19.7656	-0.17412				19.7749	-0.04871
					19.7864	-0.12876				19.7958	0.019462
					19.8073	-0.08363				19.8166	0.087469
					19.8281	-0.03866				19.8375	0.15506
					19.849	0.006231				19.8583	0.221985
					19.8698	0.051121				19.8792	0.287981
					19.8907	0.096094				19.9002	0.352779
					19.9115	0.141228				19.9212	0.416093
					19.9324	0.186598				19.9423	0.477623
					19.9532	0.232276				19.9634	0.537055
					19.974	0.278325				19.9847	0.59406
					19.9948	0.324803				20.006	0.648297
					20.0155	0.371755				20.0275	0.699421
					20.0362	0.412846				20.049	0.730491
					20.0569	0.428809				20.0708	0.694011
					20.0776	0.438485				20.0926	0.643303
					20.0982	0.448208				20.1146	0.595172
					20.1188	0.457971				20.1367	0.549426
					20.1394	0.467762				20.1589	0.505873
					20.16	0.477573				20.1812	0.46432
					20.1805	0.487392				20.2036	0.424573
					20.201	0.497206				20.2261	0.386441
					20.2215	0.507004				20.2487	0.349734
					20.2419	0.516771				20.2713	0.314265
					20.2624	0.526492				20.2939	0.279852
					20.2828	0.536152				20.3165	0.246312
					20.3032	0.545735				20.3392	0.213463
					20.3236	0.555224				20.3619	0.181125
					20.3439	0.564601				20.3845	0.149114
					20.3643	0.573847				20.4071	0.117247
					20.3846	0.582942				20.4296	0.085334
					20.4049	0.591867				20.4521	0.053178
					20.4253	0.600601				20.4745	0.020578
					20.4456	0.611281				20.4968	-0.00235
					20.4659	0.63024				20.519	0.015856
					20.4863	0.650759				20.5411	0.044915
					20.5066	0.670572				20.5631	0.074377
					20.527	0.689594				20.5851	0.104057
					20.5474	0.707737				20.607	0.133762
					20.5678	0.724917				20.6289	0.163294
					20.5883	0.741048				20.6507	0.192453
					20.6088	0.756045				20.6726	0.221038
					20.6293	0.76983				20.6944	0.248851
					20.65	0.782326				20.7163	0.275698
					20.6706	0.793463				20.7383	0.301395
					20.6914	0.803178				20.7603	0.325767
					20.7123	0.811414				20.7824	0.348652
					20.7332	0.818126				20.8046	0.369904
					20.7543	0.823276				20.827	0.389394
					20.7755	0.826838				20.8494	0.407014
					20.7968	0.828796				20.8721	0.422676
					20.8182	0.829147				20.8949	0.436316
					20.8399	0.8279				20.9179	0.447891
					20.8616	0.818008				20.9411	0.440836
					20.8836	0.779879				20.9645	0.368722
					20.9057	0.737036				20.9881	0.285134
					20.9279	0.696683				21.012	0.205987
					20.9504	0.658685				21.0359	0.130253
					20.973	0.622903				21.06	0.05697
					20.9957	0.589198				21.0842	-0.01477
					21.0185	0.557436				21.1084	-0.08584
					21.0415	0.527485				21.1326	-0.15707
					21.0646	0.499216				21.1568	-0.22931
					21.0878	0.472507				21.181	-0.30337
					21.111	0.447241				21.2051	-0.3801
					21.1344	0.423304				21.2291	-0.46034
					21.1578	0.40059				21.253	-0.54498
					21.1813	0.378996				21.2767	-0.63492
					21.2048	0.358425				21.3002	-0.73107
					21.2284	0.338783				21.3235	-0.83436
					21.252	0.319982				21.3466	-0.9457
					21.2755	0.301935				21.3695	-1.06595
					21.2991	0.28456				21.3921	-1.19585
					21.3226	0.264577				21.4144	-1.31982
					21.3462	0.232046				21.4364	-1.38521
					21.3696	0.196098				21.4582	-1.43382
					21.3931	0.159881				21.4798	-1.48059
					21.4165	0.123397				21.5011	-1.52499
					21.4398	0.086645				21.5223	-1.56642
					21.4632	0.049618				21.5433	-1.60431
					21.4865	0.012306				21.5641	-1.6381
					21.5097	-0.0253				21.5848	-1.66726
					21.533	-0.06322				21.6054	-1.69132
					21.5561	-0.10145				21.6258	-1.70985
					21.5793	-0.14001				21.6463	-1.72254
					21.6024	-0.17891				21.6667	-1.72916
					21.6255	-0.21815				21.6871	-1.72957
					21.6485	-0.25771				21.7076	-1.72376
					21.6715	-0.29759				21.728	-1.71184
					21.6944	-0.33777				21.7486	-1.69401
					21.7174	-0.3782				21.7692	-1.67057
					21.7402	-0.41885				21.7899	-1.64192
					21.7631	-0.45964				21.8108	-1.60853
					21.7859	-0.49234				21.8318	-1.55178
					21.8087	-0.49238				21.853	-1.41871
					21.8315	-0.48436				21.8745	-1.27302
					21.8542	-0.47646				21.8961	-1.13492
					21.8769	-0.46869				21.9179	-1.00445
					21.8996	-0.46106				21.9398	-0.88134
					21.9222	-0.45357				21.9619	-0.76508
					21.9448	-0.44623				21.9842	-0.65501
					21.9673	-0.43904				22.0066	-0.55036
					21.9899	-0.43201				22.0291	-0.4503
					22.0123	-0.42513				22.0517	-0.35396
					22.0348	-0.4184				22.0743	-0.26044
					22.0571	-0.41184				22.097	-0.16882
					22.0795	-0.40544				22.1197	-0.07819
					22.1017	-0.39919				22.1424	0.012401
					22.124	-0.39311				22.165	0.103908
					22.1461	-0.38719				22.1876	0.197315
					22.1682	-0.38144				22.21	0.293633
					22.1902	-0.37584				22.2324	0.393909
					22.2122	-0.3704				22.2546	0.499222
					22.2341	-0.35436				22.2766	0.589924
					22.2559	-0.29466				22.2985	0.600996
					22.2777	-0.22266				22.3202	0.589764
					22.2993	-0.1493				22.3417	0.576502
					22.321	-0.07492				22.363	0.561252
					22.3426	0.000199				22.3843	0.544075
					22.3642	0.075738				22.4054	0.525045
					22.3858	0.151394				22.4264	0.50425
					22.4073	0.226846				22.4473	0.481793
					22.4289	0.301757				22.4681	0.457787
					22.4505	0.375769				22.4889	0.432353
					22.4721	0.448494				22.5096	0.405622
					22.4938	0.519517				22.5302	0.37773
					22.5155	0.588391				22.5509	0.348818
					22.5373	0.65464				22.5714	0.319028
					22.5591	0.717761				22.592	0.288506
					22.5811	0.777236				22.6126	0.257396
					22.6032	0.832537				22.6332	0.225843
					22.6254	0.883143				22.6538	0.193987
					22.6478	0.928551				22.6744	0.161968
					22.6704	0.931619				22.695	0.137439
					22.6932	0.78917				22.7157	0.142985
					22.7161	0.620408				22.7365	0.156053
					22.7393	0.46086				22.7572	0.169162
					22.7625	0.308164				22.778	0.18234
					22.7858	0.15992				22.7988	0.19561
					22.8091	0.013712				22.8197	0.208999
					22.8324	-0.13289				22.8405	0.22253
					22.8557	-0.28236				22.8614	0.236226
					22.8788	-0.43718				22.8822	0.250112
					22.9018	-0.5999				22.9031	0.264209
					22.9246	-0.7731				22.924	0.278541
					22.9472	-0.95933				22.9448	0.29313
					22.9696	-1.16101				22.9657	0.307998
					22.9917	-1.38023				22.9865	0.323165
					23.0134	-1.61848				23.0073	0.338652
					23.0349	-1.87618				23.0281	0.354481
					23.0561	-2.15209				23.0489	0.37067
					23.0771	-2.44254				23.0696	0.387238
					23.0977	-2.74063				23.0903	0.404203
					23.1182	-2.96654				23.1109	0.409937
					23.1384	-2.89266				23.1316	0.369023
					23.1586	-2.71525				23.1521	0.315753
					23.1788	-2.51224				23.1727	0.261824
					23.199	-2.29357				23.1932	0.207356
					23.2194	-2.06771				23.2137	0.152454
					23.2398	-1.84133				23.2342	0.097214
					23.2604	-1.61916				23.2547	0.041725
					23.2811	-1.40425				23.2752	-0.01393
					23.3019	-1.19818				23.2956	-0.06966
					23.3229	-1.00142				23.3161	-0.1254
					23.3441	-0.81363				23.3365	-0.18105
					23.3653	-0.63384				23.357	-0.23651
					23.3867	-0.46074				23.3775	-0.29169
					23.4081	-0.29271				23.398	-0.34646
					23.4296	-0.12799				23.4185	-0.40069
					23.4511	0.035251				23.439	-0.45424
					23.4726	0.198899				23.4595	-0.50694
					23.4941	0.364822				23.4801	-0.55859
					23.5155	0.534835				23.5007	-0.60899
					23.5368	0.67921				23.5214	-0.64492
					23.558	0.701623				23.5421	-0.62798
					23.5791	0.691938				23.5629	-0.59831
					23.6001	0.681147				23.5838	-0.56906
					23.6211	0.669298				23.6047	-0.54026
					23.6419	0.656441				23.6256	-0.51194
					23.6627	0.642628				23.6467	-0.48412
					23.6835	0.627915				23.6678	-0.4568
					23.7041	0.612359				23.6889	-0.42998
					23.7248	0.596019				23.7101	-0.40366
					23.7453	0.578954				23.7313	-0.37784
					23.7659	0.561221				23.7527	-0.3525
					23.7864	0.54288				23.774	-0.32762
					23.8068	0.523985				23.7954	-0.30319
					23.8273	0.504593				23.8169	-0.27919
					23.8477	0.484755				23.8384	-0.25558
					23.8681	0.464524				23.8599	-0.23235
					23.8885	0.443946				23.8815	-0.20946
					23.9089	0.423067				23.9031	-0.18688
					23.9292	0.40193				23.9248	-0.16458
					23.9496	0.383636				23.9464	-0.14507
					23.97	0.377442				23.9681	-0.13584
					23.9903	0.374241				23.9898	-0.12921
					24.0107	0.370985				24.0116	-0.12264
					24.031	0.367676				24.0333	-0.11611
					24.0514	0.364317				24.0551	-0.10963
					24.0718	0.360912				24.0769	-0.1032
					24.0921	0.357464				24.0987	-0.09682
					24.1125	0.353975				24.1206	-0.09048
					24.1329	0.350449				24.1424	-0.08417
					24.1532	0.346888				24.1643	-0.07791
					24.1736	0.343296				24.1861	-0.07168
					24.194	0.339674				24.208	-0.06548
					24.2144	0.336027				24.2299	-0.05931
					24.2348	0.332355				24.2519	-0.05317
					24.2552	0.328663				24.2738	-0.04705
					24.2756	0.324952				24.2957	-0.04095
					24.2961	0.321225				24.3177	-0.03488
					24.3165	0.317484				24.3396	-0.02882
					24.337	0.313732				24.3616	-0.02277
					24.3575	0.30837				24.3835	-0.01443
					24.3779	0.296623				24.4055	0.003112
					24.3984	0.283326				24.4274	0.022964
					24.4189	0.270084				24.4494	0.042852
					24.4395	0.2569				24.4714	0.062806
					24.46	0.243777				24.4933	0.082859
					24.4805	0.230716				24.5152	0.103041
					24.5011	0.217716				24.5371	0.123385
					24.5217	0.204778				24.559	0.14392
					24.5422	0.191899				24.5809	0.164678
					24.5628	0.179079				24.6027	0.185688
					24.5834	0.166316				24.6245	0.206978
					24.6041	0.153606				24.6462	0.228578
					24.6247	0.140946				24.6679	0.250514
					24.6453	0.128333				24.6896	0.272813
					24.6659	0.115762				24.7112	0.295498
					24.6866	0.103229				24.7328	0.318593
					24.7072	0.090729				24.7543	0.342118
					24.7278	0.078258				24.7758	0.366091
					24.7485	0.065809				24.7972	0.390528
					24.7691	0.05718				24.8185	0.41229
					24.7898	0.06376				24.8398	0.421744
					24.8104	0.074118				24.8611	0.428073
					24.8311	0.084441				24.8822	0.434395
					24.8517	0.094721				24.9034	0.440704
					24.8724	0.10495				24.9245	0.446992
					24.8931	0.115119				24.9455	0.453254
					24.9138	0.12522				24.9664	0.45948
					24.9345	0.135244				24.9874	0.465664
					24.9552	0.145182				25.0082	0.471797
					24.9759	0.155026				25.0291	0.477872
					24.9966	0.164766				25.0498	0.48388
					25.0174	0.174393				25.0706	0.489812
					25.0382	0.183898				25.0913	0.495659
					25.059	0.193271				25.112	0.501413
					25.0799	0.202503				25.1326	0.507063
					25.1008	0.211585				25.1532	0.512601
					25.1217	0.220508				25.1738	0.518017
					25.1426	0.22926				25.1943	0.523302
					25.1636	0.237834				25.2148	0.528446
					25.1846	0.22222				25.2353	0.529703
					25.2056	0.111142				25.2558	0.515797
					25.2267	-0.02292				25.2762	0.497861
					25.2478	-0.15689				25.2966	0.479659
					25.2689	-0.29179				25.3171	0.461227
					25.2899	-0.4286				25.3375	0.442597
					25.3109	-0.56823				25.3579	0.4238
					25.3318	-0.71147				25.3783	0.404862
					25.3527	-0.85892				25.3986	0.385808
					25.3735	-1.01096				25.419	0.36666
					25.3942	-1.16762				25.4394	0.347439
					25.4148	-1.32851				25.4597	0.32816
					25.4353	-1.49269				25.4801	0.308839
					25.4557	-1.65859				25.5005	0.289488
					25.476	-1.82384				25.5208	0.270117
					25.4963	-1.9853				25.5412	0.250734
					25.5166	-2.13895				25.5615	0.231347
					25.5369	-2.28008				25.5819	0.211959
					25.5572	-2.40349				25.6022	0.192573
					25.5776	-2.50385				25.6226	0.173192
					25.5983	-2.51973				25.6429	0.156564
					25.6191	-2.29313				25.6633	0.150924
					25.6402	-2.01777				25.6836	0.148001
					25.6615	-1.75733				25.704	0.145045
					25.6832	-1.51448				25.7243	0.142058
					25.7051	-1.28989				25.7447	0.13904
					25.7274	-1.08286				25.765	0.135995
					25.7498	-0.89184				25.7854	0.132923
					25.7725	-0.71479				25.8057	0.129827
					25.7955	-0.54941				25.8261	0.126708
					25.8185	-0.39331				25.8465	0.123568
					25.8418	-0.2441				25.8669	0.120409
					25.8651	-0.09939				25.8873	0.117233
					25.8884	0.043169				25.9077	0.114041
					25.9117	0.185879				25.9281	0.110835
					25.9351	0.331034				25.9486	0.107617
					25.9583	0.480908				25.969	0.104389
					25.9814	0.637763				25.9895	0.101152
					26.0044	0.803812				26.01	0.097907
					26.0271	0.981171				26.0305	0.094658
					26.0497	1.13446				26.051	0.096452
					26.0721	1.14503				26.0716	0.118399
					26.0942	1.11349				26.0921	0.145344
					26.1161	1.07631				26.1127	0.172272
					26.1379	1.03392				26.1333	0.199213
					26.1596	0.986791				26.1539	0.226192
					26.1811	0.935409				26.1745	0.253234
					26.2025	0.880267				26.1951	0.280361
					26.2238	0.821843				26.2157	0.307588
					26.245	0.760595				26.2364	0.33493
					26.2661	0.696944				26.257	0.362396
					26.2872	0.631274				26.2776	0.38999
					26.3083	0.563925				26.2982	0.417712
					26.3293	0.495191				26.3188	0.445556
					26.3502	0.425322				26.3394	0.473509
					26.3712	0.354529				26.36	0.501552
					26.3921	0.282983				26.3806	0.529659
					26.4129	0.210824				26.4012	0.557797
					26.4338	0.138165				26.4217	0.585924
					26.4546	0.065099				26.4423	0.613991
					26.4754	0.002533				26.4629	0.630974
					26.4962	-0.01689				26.4835	0.603766
					26.517	-0.02551				26.504	0.565032
					26.5377	-0.03415				26.5247	0.525845
					26.5585	-0.04279				26.5453	0.486346
					26.5793	-0.05144				26.5659	0.446664
					26.6	-0.06008				26.5866	0.406914
					26.6208	-0.06872				26.6073	0.367196
					26.6415	-0.07734				26.628	0.327599
					26.6622	-0.08593				26.6488	0.288197
					26.683	-0.09449				26.6697	0.249057
					26.7037	-0.10302				26.6905	0.210232
					26.7245	-0.1115				26.7115	0.171771
					26.7452	-0.11993				26.7325	0.133713
					26.766	-0.12831				26.7535	0.096092
					26.7868	-0.13662				26.7746	0.058936
					26.8075	-0.14486				26.7957	0.022271
					26.8283	-0.15301				26.8169	-0.01388
					26.8491	-0.16108				26.8382	-0.0495
					26.87	-0.16906				26.8596	-0.08456
					26.8908	-0.17323				26.881	-0.10206
					26.9117	-0.16256				26.9024	-0.05174
					26.9326	-0.14829				26.924	0.014556
					26.9535	-0.13413				26.9456	0.079799
					26.9744	-0.12006				26.9673	0.14399
					26.9953	-0.10609				26.989	0.207132
					27.0163	-0.09219				27.0109	0.26921
					27.0373	-0.07836				27.0328	0.330198
					27.0583	-0.0646				27.0547	0.390044
					27.0792	-0.05088				27.0768	0.448676
					27.1002	-0.03721				27.0989	0.505992
					27.1212	-0.02357				27.1211	0.561862
					27.1422	-0.00995				27.1434	0.616123
					27.1632	0.003666				27.1658	0.668583
					27.1842	0.017279				27.1883	0.719018
					27.2052	0.030902				27.2109	0.767175
					27.2263	0.044545				27.2336	0.812777
					27.2473	0.05822				27.2565	0.855526
					27.2682	0.071936				27.2795	0.895112
					27.2892	0.085702				27.3027	0.93122
					27.3102	0.097365				27.326	0.925796
					27.3312	0.100411				27.3495	0.772064
					27.3521	0.101298				27.3732	0.591374
					27.373	0.102186				27.397	0.419551
					27.394	0.103075				27.4209	0.253462
					27.4149	0.103965				27.4447	0.089884
					27.4358	0.104855				27.4686	-0.0745
					27.4567	0.105747				27.4923	-0.24315
					27.4776	0.106639				27.5158	-0.41968
					27.4984	0.107532				27.5392	-0.60795
					27.5193	0.108426				27.5622	-0.81205
					27.5401	0.10932				27.585	-1.03627
					27.561	0.110215				27.6075	-1.28497
					27.5818	0.11111				27.6295	-1.56231
					27.6026	0.112006				27.6512	-1.87169
					27.6234	0.112901				27.6724	-2.21485
					27.6442	0.113797				27.6933	-2.59053
					27.665	0.114693				27.7137	-2.99264
					27.6858	0.115589				27.7338	-3.40816
					27.7065	0.116485				27.7537	-3.81542
					27.7273	0.117894				27.7733	-4.09711
					27.748	0.121363				27.7928	-3.96206
					27.7688	0.12536				27.8123	-3.67516
					27.7895	0.129372				27.8321	-3.34872
					27.8102	0.133399				27.852	-3.00622
					27.8309	0.137441				27.8722	-2.66588
					27.8516	0.141499				27.8927	-2.34012
					27.8723	0.145572				27.9136	-2.03625
					27.893	0.14966				27.9348	-1.75754
					27.9136	0.153763				27.9564	-1.50447
					27.9343	0.157882				27.9784	-1.27573
					27.9549	0.162015				28.0006	-1.06899
					27.9756	0.166163				28.0232	-0.88139
					27.9962	0.170325				28.046	-0.70988
					28.0168	0.174501				28.069	-0.55142
					28.0374	0.178691				28.0922	-0.40306
					28.058	0.182894				28.1155	-0.26194
					28.0785	0.18711				28.1389	-0.12531
					28.0991	0.191338				28.1623	0.009522
					28.1197	0.195578				28.1857	0.145221
					28.1402	0.201814				28.2091	0.264497
					28.1607	0.216027				28.2323	0.307314
					28.1812	0.232289				28.2553	0.331076
					28.2017	0.248618				28.2783	0.35549
					28.2222	0.265012				28.3011	0.380559
					28.2427	0.281469				28.3238	0.406284
					28.2632	0.297985				28.3463	0.432662
					28.2836	0.314554				28.3687	0.459683
					28.3041	0.331171				28.391	0.48733
					28.3245	0.347826				28.4132	0.51558
					28.345	0.364509				28.4353	0.5444
					28.3654	0.381208				28.4572	0.57375
					28.3858	0.39791				28.479	0.603578
					28.4062	0.414599				28.5007	0.633822
					28.4265	0.431256				28.5223	0.664409
					28.4469	0.447862				28.5438	0.69525
					28.4673	0.464394				28.5652	0.726248
					28.4876	0.480828				28.5866	0.757287
					28.508	0.497138				28.6078	0.788241
					28.5284	0.513294				28.6289	0.818966
					28.5487	0.53163				28.65	0.837306
					28.5691	0.559189				28.671	0.806553
					28.5895	0.588797				28.6919	0.762075
					28.6099	0.618008				28.7128	0.716068
					28.6303	0.646735				28.7337	0.668778
					28.6507	0.674881				28.7545	0.620426
					28.6712	0.702344				28.7753	0.57121
					28.6916	0.729011				28.7961	0.521301
					28.7122	0.754766				28.8169	0.470846
					28.7327	0.779486				28.8376	0.419969
					28.7533	0.803044				28.8584	0.368771
					28.774	0.82531				28.8791	0.317332
					28.7947	0.846156				28.8998	0.265714
					28.8155	0.865452				28.9205	0.213963
					28.8363	0.883073				28.9412	0.162111
					28.8573	0.8989				28.9619	0.110181
					28.8783	0.912821				28.9826	0.058186
					28.8995	0.924737				29.0033	0.006132
					28.9208	0.934559				29.024	-0.04598
					28.9422	0.942215				29.0446	-0.09813
					28.9638	0.918465				29.0653	-0.1387
					28.9855	0.780104				29.086	-0.13273
					29.0074	0.620272				29.1067	-0.11511
					29.0294	0.46743				29.1273	-0.09749
					29.0514	0.320039				29.148	-0.07985
					29.0736	0.176465				29.1686	-0.0622
					29.0958	0.035023				29.1893	-0.04453
					29.118	-0.10599				29.2099	-0.02684
					29.1401	-0.24829				29.2306	-0.00914
					29.1623	-0.39358				29.2512	0.008597
					29.1843	-0.54351				29.2718	0.026358
					29.2062	-0.69969				29.2925	0.04415
					29.228	-0.86357				29.3131	0.061976
					29.2497	-1.03642				29.3337	0.079839
					29.2711	-1.21917				29.3543	0.097742
					29.2924	-1.41224				29.3749	0.115685
					29.3136	-1.61533				29.3955	0.133672
					29.3345	-1.82713				29.416	0.151701
					29.3553	-2.04506				29.4366	0.169774
					29.3759	-2.26487				29.4572	0.187889
					29.3964	-2.4218				29.4777	0.207686
					29.4167	-2.32972				29.4982	0.234124
					29.4371	-2.16145				29.5188	0.262336
					29.4575	-1.98139				29.5393	0.290694
					29.4779	-1.79504				29.5598	0.319204
					29.4984	-1.60682				29.5803	0.347867
					29.519	-1.42001				29.6008	0.376681
					29.5397	-1.23683				29.6212	0.405636
					29.5604	-1.05859				29.6417	0.434719
					29.5813	-0.88585				29.6621	0.463907
					29.6023	-0.71856				29.6825	0.493174
					29.6233	-0.55625				29.7029	0.522485
					29.6444	-0.39813				29.7233	0.551795
					29.6656	-0.24316				29.7437	0.581054
					29.6868	-0.0902				29.7641	0.610202
					29.708	0.062009				29.7845	0.639169
					29.7292	0.214736				29.8048	0.667876
					29.7504	0.369234				29.8252	0.696237
					29.7715	0.526685				29.8456	0.724153
					29.7925	0.68814				29.866	0.751519
					29.8135	0.817713				29.8863	0.766175
					29.8344	0.802504				29.9067	0.732146
					29.8553	0.748432				29.9272	0.685987
					29.876	0.692125				29.9476	0.639914
					29.8967	0.633919				29.9681	0.594041
					29.9174	0.57412				29.9886	0.548456
					29.938	0.513005				30.0092	0.503222
					29.9585	0.450816				30.0298	0.458385
					29.9791	0.387765				30.0504	0.413967
					29.9996	0.324036				30.071	0.369976
					30.0201	0.259784				30.0917	0.326406
					30.0406	0.195143				30.1123	0.283236
					30.0611	0.130226				30.133	0.240437
					30.0816	0.065133				30.1538	0.197968
					30.1021	-4.6e-05				30.1745	0.155782
					30.1226	-0.06523				30.1953	0.113826
					30.1431	-0.13033				30.216	0.072042
					30.1636	-0.19525				30.2368	0.030369
					30.1841	-0.2599				30.2575	-0.01126
					30.2046	-0.32417				30.2783	-0.0529
					30.2251	-0.36616				30.2991	-0.0893
					30.2457	-0.32095				30.3198	-0.10455
					30.2662	-0.2544				30.3406	-0.11452
					30.2868	-0.18828				30.3613	-0.12454
					30.3074	-0.12249				30.382	-0.13459
					30.328	-0.05692				30.4028	-0.14469
					30.3486	0.008545				30.4235	-0.15484
					30.3692	0.074024				30.4442	-0.16503
					30.3898	0.139637				30.4648	-0.17528
					30.4104	0.205499				30.4855	-0.18557
					30.431	0.271715				30.5062	-0.19592
					30.4516	0.338372				30.5268	-0.20632
					30.4721	0.405536				30.5474	-0.21678
					30.4926	0.473248				30.568	-0.22728
					30.5131	0.541513				30.5886	-0.23784
					30.5336	0.610297				30.6092	-0.24846
					30.554	0.679518				30.6298	-0.25912
					30.5745	0.749039				30.6503	-0.26983
					30.5949	0.818663				30.6709	-0.28058
					30.6153	0.888124				30.6914	-0.29138
					30.6356	0.93682				30.7119	-0.2901
					30.656	0.903583				30.7324	-0.24024
					30.6764	0.849226				30.7529	-0.17796
					30.6968	0.794299				30.7733	-0.11545
					30.7172	0.739058				30.7938	-0.0528
					30.7376	0.683718				30.8143	0.009911
					30.758	0.628447				30.8347	0.072613
					30.7784	0.57338				30.8552	0.135228
					30.7989	0.518612				30.8757	0.197677
					30.8194	0.464206				30.8961	0.259871
					30.8399	0.410197				30.9167	0.321705
					30.8604	0.356596				30.9372	0.383058
					30.881	0.303389				30.9577	0.443789
					30.9016	0.250547				30.9782	0.50373
					30.9221	0.198024				30.9988	0.562688
					30.9427	0.145761				31.0195	0.62044
					30.9633	0.09369				31.0401	0.676733
					30.9839	0.041738				31.0608	0.731286
					31.0045	-0.01018				31.0816	0.78379
					31.0251	-0.06213				31.1025	0.833912
					31.0457	-0.09959				31.1234	0.857014
					31.0663	-0.07863				31.1445	0.782337
					31.0869	-0.04296				31.1656	0.686055
					31.1075	-0.00722				31.1868	0.592688
					31.1281	0.028522				31.2081	0.502033
					31.1486	0.064237				31.2295	0.413809
					31.1692	0.099876				31.2509	0.32768
					31.1898	0.135392				31.2724	0.243264
					31.2104	0.170737				31.2939	0.16015
					31.231	0.205859				31.3154	0.077908
					31.2517	0.240702				31.337	-0.00391
					31.2723	0.275209				31.3586	-0.08574
					31.293	0.309315				31.3801	-0.16805
					31.3137	0.342954				31.4016	-0.25127
					31.3344	0.37605				31.4231	-0.33583
					31.3552	0.408527				31.4445	-0.42214
					31.376	0.440299				31.4659	-0.51058
					31.3969	0.471279				31.4871	-0.60148
					31.4178	0.501373				31.5084	-0.69512
					31.4388	0.530482				31.5295	-0.79168
					31.4598	0.553377				31.5505	-0.87806
					31.4809	0.555049				31.5714	-0.91328
					31.5021	0.551538				31.5923	-0.93509
					31.5234	0.548042				31.613	-0.95638
					31.5447	0.544563				31.6337	-0.97706
					31.5661	0.541099				31.6543	-0.99699
					31.5876	0.53765				31.6749	-1.01605
					31.6092	0.534214				31.6954	-1.03413
					31.6308	0.530793				31.7158	-1.05108
					31.6526	0.527384				31.7362	-1.06679
					31.6744	0.523988				31.7566	-1.08114
					31.6963	0.520604				31.777	-1.09401
					31.7182	0.51723				31.7973	-1.10528
					31.7403	0.513867				31.8177	-1.11487
					31.7625	0.510514				31.8381	-1.12267
					31.7847	0.507171				31.8585	-1.12862
					31.807	0.503836				31.8789	-1.13264
					31.8294	0.500509				31.8994	-1.13469
					31.8519	0.497189				31.9199	-1.13474
					31.8745	0.493876				31.9405	-1.13277
					31.8972	0.465606				31.9612	-1.10908
					31.92	0.339488				31.982	-1.0066
					31.9428	0.19217				32.0029	-0.88742
					31.9657	0.046723				32.0239	-0.77169
					31.9885	-0.09916				32.0449	-0.65938
					32.0112	-0.24784				32.066	-0.55029
					32.0339	-0.40173				32.0872	-0.44409
					32.0564	-0.56333				32.1085	-0.34035
					32.0787	-0.73515				32.1298	-0.23858
					32.1009	-0.91976				32.1512	-0.13821
					32.1227	-1.11962				32.1725	-0.03868
					32.1443	-1.33696				32.1939	0.060619
					32.1656	-1.57351				32.2153	0.160284
					32.1867	-1.83007				32.2366	0.260912
					32.2074	-2.10602				32.2579	0.363077
					32.2278	-2.39853				32.2792	0.46732
					32.248	-2.70179				32.3004	0.574125
					32.2679	-3.00621				32.3215	0.683903
					32.2876	-3.29802				32.3425	0.796957
					32.3073	-3.55956				32.3635	0.913456
					32.3268	-3.69775				32.3843	1.00222
					32.3465	-3.48853				32.4051	0.966758
					32.3663	-3.17526				32.4258	0.896843
					32.3864	-2.85186				32.4464	0.82384
					32.4068	-2.53343				32.4669	0.748315
					32.4275	-2.23011				32.4875	0.670772
					32.4485	-1.9477				32.508	0.591645
					32.4699	-1.68874				32.5284	0.511303
					32.4917	-1.45343				32.5489	0.430051
					32.5138	-1.24053				32.5693	0.348134
					32.5363	-1.04793				32.5897	0.265748
					32.559	-0.87311				32.6101	0.183045
					32.582	-0.7134				32.6305	0.100145
					32.6052	-0.56612				32.6509	0.017145
					32.6287	-0.42869				32.6713	-0.06587
					32.6522	-0.29862				32.6917	-0.14882
					32.6759	-0.17356				32.7121	-0.23162
					32.6996	-0.05118				32.7326	-0.31415
					32.7233	0.070768				32.753	-0.39628
					32.7469	0.194558				32.7734	-0.47783
					32.7705	0.298667				32.7939	-0.54095
					32.7939	0.310478				32.8143	-0.533
					32.8172	0.297768				32.8348	-0.50745
					32.8404	0.284009				32.8554	-0.48202
					32.8635	0.269258				32.8759	-0.45673
					32.8865	0.253581				32.8965	-0.43163
					32.9094	0.23705				32.9171	-0.40671
					32.9323	0.219745				32.9378	-0.382
					32.9551	0.201749				32.9584	-0.35751
					32.9778	0.183154				32.9791	-0.33324
					33.0006	0.164053				32.9999	-0.30919
					33.0233	0.144542				33.0206	-0.28537
					33.046	0.12472				33.0414	-0.26176
					33.0688	0.104687				33.0622	-0.23836
					33.0915	0.084542				33.083	-0.21516
					33.1143	0.064385				33.1038	-0.19214
					33.1372	0.044311				33.1247	-0.16929
					33.1601	0.024417				33.1456	-0.1466
					33.1831	0.004792				33.1665	-0.12404
					33.2062	-0.01448				33.1874	-0.1016
					33.2294	-0.0276				33.2083	-0.07699
					33.2527	-0.01779				33.2292	-0.04343
					33.2761	-0.00261				33.2501	-0.00767
					33.2996	0.012291				33.271	0.028086
					33.3231	0.026969				33.2919	0.063882
					33.3467	0.041494				33.3129	0.099779
					33.3704	0.055932				33.3338	0.135832
					33.3941	0.070344				33.3547	0.172092
					33.4179	0.084792				33.3755	0.208611
					33.4416	0.099339				33.3964	0.245434
					33.4654	0.114043				33.4172	0.282603
					33.4892	0.128967				33.438	0.320154
					33.513	0.144171				33.4588	0.358117
					33.5367	0.15972				33.4795	0.396513
					33.5604	0.175678				33.5003	0.435356
					33.5841	0.192112				33.5209	0.474646
					33.6077	0.209092				33.5416	0.514375
					33.6312	0.226689				33.5622	0.554518
					33.6547	0.244981				33.5828	0.595038
					33.6781	0.264049				33.6033	0.635878
					33.7013	0.281412				33.6238	0.667796
					33.7245	0.289097				33.6443	0.662931
					33.7476	0.294275				33.6647	0.648396
					33.7706	0.299444				33.6852	0.63337
					33.7934	0.304599				33.7056	0.617903
					33.8162	0.309733				33.7259	0.602042
					33.8389	0.31484				33.7463	0.585835
					33.8614	0.319914				33.7667	0.569324
					33.8839	0.32495				33.7871	0.552554
					33.9063	0.32994				33.8074	0.535562
					33.9286	0.334878				33.8278	0.518388
					33.9509	0.339757				33.8481	0.501064
					33.973	0.34457				33.8685	0.483623
					33.9951	0.349311				33.8889	0.466094
					34.0171	0.353971				33.9093	0.448505
					34.039	0.358545				33.9297	0.430878
					34.0608	0.363025				33.9501	0.413236
					34.0826	0.367403				33.9705	0.395597
					34.1043	0.371673				33.9909	0.377978
					34.126	0.375827				34.0113	0.360393
					34.1476	0.379434				34.0318	0.347505
					34.1691	0.381235				34.0522	0.353199
					34.1906	0.382549				34.0727	0.363404
					34.2121	0.383806				34.0932	0.373447
					34.2334	0.385007				34.1137	0.383312
					34.2548	0.386149				34.1342	0.392985
					34.276	0.387233				34.1548	0.402452
					34.2973	0.388259				34.1754	0.411697
					34.3185	0.389225				34.196	0.420706
					34.3396	0.390132				34.2166	0.429464
					34.3607	0.390979				34.2373	0.437953
					34.3817	0.391765				34.258	0.446159
					34.4028	0.392491				34.2787	0.454067
					34.4237	0.393157				34.2995	0.46166
					34.4447	0.393762				34.3203	0.468923
					34.4655	0.394306				34.3412	0.475842
					34.4864	0.394789				34.3621	0.482402
					34.5072	0.395212				34.3831	0.488588
					34.528	0.395574				34.4042	0.494387
					34.5487	0.395875				34.4253	0.499787
					34.5695	0.392685				34.4464	0.495362
					34.5901	0.375597				34.4677	0.453544
					34.6108	0.354757				34.489	0.40349
					34.6314	0.333613				34.5104	0.35461
					34.652	0.312197				34.5318	0.306784
					34.6726	0.290541				34.5532	0.259882
					34.6932	0.268671				34.5747	0.213766
					34.7137	0.246615				34.5963	0.168294
					34.7342	0.224396				34.6178	0.123317
					34.7548	0.202037				34.6394	0.078683
					34.7753	0.179556				34.661	0.034237
					34.7958	0.156973				34.6826	-0.01018
					34.8162	0.134305				34.7041	-0.05472
					34.8367	0.111565				34.7257	-0.09954
					34.8572	0.088769				34.7472	-0.14481
					34.8777	0.06593				34.7687	-0.19068
					34.8982	0.04306				34.7901	-0.23731
					34.9186	0.02017				34.8115	-0.28486
					34.9391	-0.00273				34.8328	-0.33346
					34.9596	-0.02562				34.8541	-0.38328
					34.98	-0.03702				34.8753	-0.41096
					35.0005	-0.00247				34.8964	-0.34449
					35.021	0.043567				34.9175	-0.2523
					35.0415	0.089637				34.9385	-0.15833
					35.0619	0.135779				34.9594	-0.06326
					35.0824	0.18203				34.9804	0.032204
					35.1028	0.22842				35.0014	0.127394
					35.1233	0.274971				35.0224	0.221624
					35.1437	0.321699				35.0435	0.314204
					35.1642	0.368606				35.0646	0.404433
					35.1846	0.415682				35.0857	0.491598
					35.205	0.462903				35.107	0.574973
					35.2254	0.510225				35.1284	0.653827
					35.2458	0.557587				35.15	0.727434
					35.2661	0.604906				35.1717	0.795086
					35.2865	0.652075				35.1936	0.856116
					35.3069	0.698964				35.2157	0.909915
					35.3272	0.745414				35.238	0.955962
					35.3476	0.791242				35.2607	0.993844
					35.368	0.836236				35.2836	1.02328
					35.3884	0.860567				35.3069	1.00597
					35.4088	0.805817				35.3306	0.84021
					35.4293	0.731644				35.3546	0.656089
					35.4498	0.657939				35.3788	0.488712
					35.4703	0.584862				35.4033	0.333442
					35.4908	0.512503				35.4279	0.186017
					35.5114	0.440897				35.4525	0.042417
					35.532	0.37003				35.4772	-0.10127
					35.5526	0.299847				35.5017	-0.24901
					35.5733	0.230261				35.526	-0.40498
					35.5939	0.161159				35.5502	-0.57373
					35.6146	0.092409				35.574	-0.76035
					35.6353	0.023865				35.5974	-0.97065
					35.656	-0.04462				35.6204	-1.21125
					35.6767	-0.11321				35.6429	-1.48963
					35.6974	-0.18206				35.6648	-1.8139
					35.718	-0.25129				35.6862	-2.19223
					35.7387	-0.32104				35.707	-2.63154
					35.7593	-0.39142				35.7272	-3.13503
					35.7799	-0.46251				35.7469	-3.6983
					35.8004	-0.51056				35.766	-4.21391
					35.821	-0.46355				35.7846	-4.33797
					35.8415	-0.39197				35.803	-4.26403
					35.862	-0.31969				35.8213	-4.08512
					35.8825	-0.24691				35.8395	-3.82169
					35.9029	-0.17377				35.8578	-3.49944
					35.9234	-0.10038				35.8762	-3.14417
					35.9439	-0.02687				35.8949	-2.77806
					35.9643	0.046687				35.9139	-2.41787
					35.9848	0.12018				35.9333	-2.07478
					36.0052	0.193515				35.953	-1.75514
					36.0257	0.26658				35.9731	-1.46158
					36.0462	0.339246				35.9936	-1.19425
					36.0667	0.411358				36.0144	-0.95167
					36.0872	0.48273				36.0357	-0.73148
					36.1078	0.553139				36.0573	-0.53095
					36.1283	0.622322				36.0793	-0.34725
					36.149	0.689971				36.1016	-0.17766
					36.1696	0.755732				36.1242	-0.01966
					36.1904	0.81921				36.1471	0.128986
					36.2111	0.86187				36.1702	0.238551
					36.232	0.830591				36.1935	0.219116
					36.253	0.781832				36.2171	0.170367
					36.274	0.734023				36.2408	0.123951
					36.2951	0.687256				36.2648	0.079592
					36.3164	0.641591				36.2889	0.037035
					36.3377	0.59706				36.3132	-0.00396
					36.3591	0.553674				36.3377	-0.04361
					36.3805	0.511423				36.3624	-0.08211
					36.4021	0.470282				36.3872	-0.11965
					36.4237	0.430212				36.4121	-0.15641
					36.4455	0.39116				36.4371	-0.19253
					36.4672	0.353066				36.4622	-0.22815
					36.4891	0.315864				36.4875	-0.26341
					36.511	0.279479				36.5128	-0.29841
					36.5329	0.243832				36.5382	-0.33325
					36.555	0.208841				36.5637	-0.36802
					36.577	0.174421				36.5893	-0.40279
					36.5991	0.140485				36.6149	-0.43761
					36.6212	0.106944				36.6406	-0.47252
					36.6434	0.062873				36.6663	-0.4911
					36.6655	-0.0243				36.6921	-0.44441
					36.6877	-0.12251				36.7179	-0.38229
					36.7098	-0.22173				36.7437	-0.32108
					36.7319	-0.32278				36.7695	-0.26062
					36.7539	-0.42646				36.7954	-0.20069
					36.7758	-0.53355				36.8212	-0.14108
					36.7976	-0.64477				36.847	-0.08152
					36.8194	-0.76079				36.8728	-0.02176
					36.8409	-0.88217				36.8986	0.038485
					36.8624	-1.0093				36.9243	0.099501
					36.8837	-1.1424				36.9499	0.161579
					36.9049	-1.28138				36.9754	0.225013
					36.9258	-1.42577				37.0008	0.290093
					36.9467	-1.57464				37.0262	0.357101
					36.9674	-1.72646				37.0514	0.426303
					36.988	-1.87904				37.0764	0.497938
					37.0085	-2.02945				37.1014	0.572209
					37.0288	-2.174				37.1262	0.649268
					37.0492	-2.30831				37.1508	0.729197
					37.0695	-2.38658				37.1753	0.789059
					37.0899	-2.28471				37.1996	0.757196
					37.1104	-2.13148				37.2238	0.698711
					37.131	-1.97301				37.248	0.636685
					37.1518	-1.8134				37.272	0.571661
					37.1728	-1.65587				37.2959	0.504153
					37.1939	-1.50277				37.3198	0.434639
					37.2152	-1.35571				37.3437	0.36356
					37.2368	-1.21564				37.3675	0.291318
					37.2586	-1.083				37.3913	0.218278
					37.2805	-0.95784				37.4151	0.144772
					37.3027	-0.83991				37.4389	0.071106
					37.3251	-0.72876				37.4627	-0.00243
					37.3476	-0.62382				37.4866	-0.07557
					37.3704	-0.5244				37.5104	-0.14804
					37.3932	-0.42978				37.5344	-0.21956
					37.4162	-0.33922				37.5583	-0.28985
					37.4393	-0.25197				37.5824	-0.35861
					37.4625	-0.16725				37.6065	-0.4255
					37.4857	-0.08434				37.6308	-0.4902
					37.509	-0.01346				37.6551	-0.53231
					37.5323	0.013122				37.6795	-0.49355
					37.5557	0.028696				37.7041	-0.43664
					37.579	0.044311				37.7288	-0.38167
					37.6023	0.060018				37.7535	-0.32844
					37.6256	0.075871				37.7784	-0.27672
					37.6488	0.091922				37.8033	-0.2263
					37.6721	0.108225				37.8283	-0.17692
					37.6953	0.124836				37.8533	-0.12836
					37.7184	0.14181				37.8783	-0.08036
					37.7415	0.159206				37.9034	-0.03268
					37.7645	0.177084				37.9284	0.014929
					37.7874	0.195507				37.9535	0.062713
					37.8103	0.21454				37.9785	0.110927
					37.8331	0.234252				38.0035	0.159821
					37.8557	0.254714				38.0284	0.209649
					37.8783	0.276				38.0532	0.260663
					37.9007	0.29819				38.078	0.313116
					37.9231	0.321367				38.1026	0.367257
					37.9453	0.345617				38.1272	0.42333
					37.9673	0.362354				38.1516	0.470394
					37.9892	0.344442				38.1759	0.473937
					38.011	0.316307				38.2	0.465891
					38.0327	0.286589				38.2241	0.457287
					38.0543	0.255434				38.248	0.448144
					38.0758	0.223001				38.2718	0.43848
					38.0972	0.189457				38.2955	0.428311
					38.1185	0.154978				38.3191	0.417658
					38.1399	0.119745				38.3426	0.406537
					38.1611	0.083945				38.3661	0.394967
					38.1824	0.047767				38.3894	0.382965
					38.2037	0.011404				38.4126	0.370548
					38.2249	-0.02495				38.4357	0.357733
					38.2462	-0.06111				38.4588	0.344535
					38.2675	-0.09688				38.4817	0.330968
					38.2888	-0.13207				38.5046	0.317048
					38.3102	-0.1665				38.5274	0.302785
					38.3317	-0.2				38.5502	0.288192
					38.3532	-0.23239				38.5728	0.273279
					38.3749	-0.26351				38.5954	0.258056
					38.3966	-0.28104				38.6179	0.244158
					38.4185	-0.24958				38.6403	0.23651
					38.4404	-0.20734				38.6627	0.230253
					38.4625	-0.16646				38.685	0.223761
					38.4847	-0.12671				38.7072	0.217042
					38.5069	-0.08789				38.7294	0.210104
					38.5292	-0.04979				38.7516	0.202956
					38.5515	-0.01223				38.7736	0.195606
					38.5739	0.025006				38.7957	0.188063
					38.5963	0.062089				38.8176	0.180336
					38.6187	0.099207				38.8396	0.172434
					38.6411	0.136542				38.8615	0.164366
					38.6635	0.174275				38.8834	0.156144
					38.6859	0.212584				38.9052	0.147775
					38.7082	0.251649				38.927	0.139271
					38.7305	0.29165				38.9488	0.130641
					38.7527	0.332764				38.9705	0.121896
					38.7749	0.375174				38.9922	0.113045
					38.797	0.419057				39.014	0.104098
					38.819	0.464591				39.0356	0.095066
					38.8409	0.499752				39.0573	0.089289
					38.8627	0.486758				39.079	0.096811
					38.8843	0.460401				39.1007	0.107723
					38.9059	0.43278				39.1223	0.118712
					38.9275	0.403996				39.1439	0.129787
					38.9489	0.374145				39.1655	0.140955
					38.9703	0.343329				39.1871	0.152226
					38.9916	0.311643				39.2087	0.163608
					39.0129	0.279183				39.2302	0.175108
					39.0341	0.246044				39.2517	0.186735
					39.0553	0.212316				39.2732	0.198495
					39.0765	0.178089				39.2947	0.210396
					39.0976	0.143448				39.3161	0.222444
					39.1187	0.10848				39.3375	0.234645
					39.1398	0.073267				39.3589	0.247006
					39.1609	0.03789				39.3802	0.259533
					39.1819	0.00243				39.4015	0.272229
					39.203	-0.03303				39.4227	0.285099
					39.2241	-0.06842				39.444	0.298146
					39.2452	-0.10365				39.4651	0.311375
					39.2663	-0.13062				39.4863	0.317333
					39.2874	-0.12537				39.5074	0.293376
					39.3085	-0.11217				39.5284	0.261484
					39.3297	-0.09908				39.5495	0.229133
					39.3509	-0.08606				39.5705	0.196391
					39.3721	-0.07312				39.5914	0.16332
					39.3933	-0.06024				39.6124	0.129982
					39.4145	-0.04742				39.6333	0.096433
					39.4357	-0.03463				39.6543	0.06273
					39.457	-0.02189				39.6752	0.028925
					39.4782	-0.00916				39.6961	-0.00493
					39.4994	0.003557				39.7171	-0.03878
					39.5207	0.01627				39.738	-0.07257
					39.5419	0.028994				39.7589	-0.10625
					39.5631	0.041737				39.7799	-0.13977
					39.5844	0.05451				39.8008	-0.17306
					39.6056	0.067323				39.8218	-0.20608
					39.6268	0.080188				39.8428	-0.23876
					39.648	0.093113				39.8638	-0.27103
					39.6692	0.106108				39.8849	-0.30283
					39.6904	0.115955				39.906	-0.32182
					39.7116	0.112921				39.9271	-0.29162
					39.7327	0.106622				39.9483	-0.24969
					39.7538	0.100283				39.9695	-0.20831
					39.7749	0.093906				39.9908	-0.1674
					39.7961	0.087495				40.012	-0.12688
					39.8171	0.081051				40.0333	-0.08664
					39.8382	0.074578				40.0546	-0.04661
					39.8593	0.068077				40.0759	-0.00669
					39.8804	0.061552				40.0972	0.033213
					39.9014	0.055005				40.1185	0.073192
					39.9225	0.048439				40.1398	0.113341
					39.9435	0.041855				40.161	0.15375
					39.9646	0.035257				40.1823	0.19451
					39.9856	0.028646				40.2035	0.235706
					40.0066	0.022025				40.2247	0.277418
					40.0277	0.015396				40.2459	0.319723
					40.0487	0.008762				40.267	0.362688
					40.0697	0.002124				40.288	0.406373
					40.0907	-0.00451				40.3091	0.450826
					40.1118	-0.01115				40.33	0.496084
					40.1328	-0.01778				40.351	0.542167
					40.1538	-0.02441				40.3718	0.589077
					40.1749	-0.03103				40.3926	0.636797
					40.1959	-0.03764				40.4134	0.685285
					40.2169	-0.04423				40.4341	0.734472
					40.238	-0.05081				40.4547	0.784257
					40.259	-0.05738				40.4753	0.834508
					40.2801	-0.06392				40.4959	0.885054
					40.3012	-0.07044				40.5164	0.935682
					40.3222	-0.07693				40.5368	0.986141
					40.3433	-0.0834				40.5572	1.03613
					40.3644	-0.08983				40.5776	1.08532
					40.3855	-0.09624				40.598	1.13331
					40.4067	-0.1026				40.6184	1.17969
					40.4278	-0.10893				40.6387	1.224
					40.4489	-0.11522				40.6591	1.26576
					40.4701	-0.12146				40.6795	1.30445
					40.4913	-0.12766				40.7	1.33959
					40.5125	-0.13381				40.7204	1.37066
					40.5337	-0.13991				40.741	1.39719
					40.5549	-0.14595				40.7617	1.41877
					40.5762	-0.15193				40.7825	1.435
					40.5975	-0.15784				40.8035	1.44558
					40.6188	-0.1637				40.8246	1.45032
					40.6401	-0.16948				40.8459	1.4491
					40.6614	-0.1752				40.8674	1.4419
					40.6828	-0.18084				40.8891	1.42884
					40.7042	-0.1864				40.9111	1.41011
					40.7257	-0.19188				40.9334	1.38604
					40.7471	-0.19727				40.9561	1.35702
					40.7686	-0.20258				40.9791	1.32353
					40.7901	-0.20779				41.0025	1.28609
					40.8117	-0.21291				41.0263	1.24528
					40.8333	-0.21793				41.0505	1.2017
					40.8549	-0.22285				41.0753	1.15594
					40.8766	-0.22766				41.1005	1.15521
					40.8983	-0.22765
