# Supplementary material for: Mechanical instability and interfacial energy drive biofilm morphogenesis
Source: eLife. 2019 Mar 8;8:e43920. doi: 10.7554/eLife.43920 (PMC6453567; doi:10.7554/eLife.43920)
Supplement: Figure 6—source data 1. [file elife-43920-fig6-data1.xlsx]

## Sheet: Figure 6
		Figure 6A							Figure 6C					Figure 6D
Description		Data extracted using customized Matlab code. The raw data are represented as (t, α). See main text for the depository of the code and figure legend for more details.							Data extracted using customized Matlab code. Data are represented as (x,κ,Vf,I). See main text for the depository of the code and figure legend for more details.					Data extracted using customized Matlab code. Data are represented as (t,κ,Vf) for two differnet points at the edge of biofilm. See main text for the depository of the code and figure legend for more details.
Condition
Computed/Measured quantity			WT - 0.4%	WT - 1.0%	ΔvpsL - 0.4%	ΔABC - 0.4%									Flat region		Delaminated region
		t (h)	α						x(mm)	κ (1/mm)	Vf (μm/min)	I		t (h)	Vf (μm/min)	κ (1/mm)	Vf (μm/min)	κ (1/mm)
		6.25	1.06015	1.06516	1.0646	1.07279			0	0.0142	2.48715	0.710619		15	3.36548	0.282915	3.34285	0.460561
		7.5	1.05761	1.05377	1.0715	1.0573			0.069308	0.0399	2.48746	0.711522		15.5	3.46524	0.289476	3.44245	0.336012
		8.75	1.04558	1.05757	1.0933	1.05265			0.138628	0.0656	2.48134	0.710799		16	3.32873	0.297446	3.42358	0.279452
		10	1.05338	1.07761	1.0982	1.05509			0.20797	0.0912	2.46928	0.708784		16.5	3.39078	0.262647	3.38025	0.27643
		11.25	1.05354	1.05097	1.0855	1.06258			0.277344	0.117	2.45173	0.710815		17	3.40703	0.212348	3.38445	0.310293
		12.5	1.04968	1.06397	1.0947	1.06084			0.346763	0.142	2.42916	0.70787		17.5	3.39215	0.225502	3.38428	0.304616
		13.75	1.07182	1.06354	1.09	1.05974			0.43015	0.172	2.40155	0.707678		18	3.33035	0.21198	3.33642	0.327911
		15	1.04624	1.05838	1.0611	1.05574			0.499731	0.199	2.36928	0.708735		18.5	3.3933	0.190283	3.38826	0.318498
		16.25	1.05016	1.05838	1.0643	1.06182			0.569426	0.236	2.33312	0.710695		19	3.3698	0.211803	3.3699	0.258817
		17.5	1.04788	1.04324	1.0503	1.069			0.653264	0.28	2.29231	0.70798		19.5	3.38118	0.230329	3.38965	0.223311
		18.75	1.04326	1.03835	1.0604	1.05329			0.723356	0.314	2.24695	0.706648		20	3.39765	0.246914	3.38267	0.183461
		20	1.05308	1.0407	1.054	1.07064			0.807832	0.353	2.19802	0.706923		20.5	3.37441	0.240426	3.35022	0.187598
		21.25	1.05226	1.03978	1.0526	1.06607			0.878619	0.384	2.1478	0.70697		21	3.39451	0.256879	3.41326	0.14423
		22.5	1.0703	1.0455	1.048	1.07281			0.964147	0.304	2.09902	0.704437		21.5	3.33361	0.235243	3.3639	0.1863
		23.75	1.05251	1.04265	1.0657	1.07769			1.03588	0.194	2.05821	0.702817		22	3.33015	0.226035	3.3554	0.185472
		25	1.04436	1.03662	1.0476	1.06784			1.10789	0.0877	2.03363	0.701797		22.5	3.36219	0.195959	3.39569	0.197867
		26.25	1.07103	1.037	1.0507	1.06248			1.18003	-0.0167	2.03255	0.700996		23	3.31994	0.18756	3.2969	0.21272
		27.5	1.06735	1.03927	1.0452	1.06281			1.25215	-0.121	2.05474	0.709139		23.5	3.37673	0.151107	3.41122	0.153159
		28.75	1.0527	1.03916	1.0417	1.06307			1.32409	-0.229	2.09019	0.72223		24	3.37593	0.147791	3.36158	0.16273
		30	1.0502	1.04207	1.0516	1.07435			1.3957	-0.359	2.12827	0.651265		24.5	3.27049	0.127689	3.31819	0.186592
		31.25	1.0617	1.03696	1.0481	1.06268			1.45266	-0.472	2.15751	0.498345		25	3.27594	0.147721	3.23659	0.168839
		32.5	1.0521	1.03499	1.0446	1.06768			1.50926	-0.59	2.16694	0.43606		25.5	3.33808	0.166439	3.30125	0.148911
		33.75	1.0552	1.03627	1.0478	1.06594			1.5795	-0.744	2.14339	0.476478		26	3.33944	0.157133	3.30446	0.197784
		35	1.0557	1.03385	1.0396	1.0578			1.63529	-0.871	2.08733	0.53186		26.5	3.25515	0.154597	3.20494	0.195323
		36.25	1.0568	1.03131	1.0445	1.05329			1.67695	-0.965	2.01335	0.635369		27	3.22808	0.185687	3.16288	0.154749
		37.5	1.0646	1.03313	1.0426	1.04998			1.73233	-1.09	1.93888	0.716581		27.5	2.92743	0.164366	2.8706	0.171426
		38.75	1.0682	1.03798	1.0426	1.05541			1.78767	-0.995	1.88111	0.689368		28	2.87863	0.165851	2.81483	0.191992
		40	1.087	1.0316	1.0441	1.04947			1.84317	-0.696	1.85308	0.688297		28.5	2.8828	0.190424	2.87425	0.198083
		41.25	1.1211	1.02923	1.0444	1.04425			1.89887	-0.403	1.86318	0.7005		29	2.90047	0.207539	2.83582	0.165145
		42.5	1.1698	1.03593	1.0492	1.05843			1.9687	-0.0451	1.90921	0.678037		29.5	2.84915	0.190429	2.81199	0.159717
		43.75	1.1711	1.03459	1.0454	1.05429			2.03857	0.311	1.97995	0.635411		30	2.88794	0.176523	2.83019	0.127341
		45	1.183	1.02736	1.044	1.05388			2.12212	0.75	2.05901	0.631385		30.5	2.78832	0.165836	2.81864	0.101108
		46.25	1.1711	1.02726	1.0464	1.04424			2.21907	0.958	2.12355	0.657941		31	2.67988	0.172568	2.69039	0.0895303
		47.5	1.1825	1.02946	1.0466	1.04128			2.316	0.733	2.1592	0.696408		31.5	2.70276	0.184819	2.71132	0.0879241
		48.75	1.1945	1.03534	1.0487	1.04075			2.39952	0.539	2.1736	0.712842		32	2.79567	0.174903	2.81134	0.105118
		50	1.2036	1.0375	1.0439	1.0436			2.48355	0.351	2.17454	0.710948		32.5	2.7885	0.162213	2.78735	0.13757
		51.25	1.2175	1.04039	1.0486	1.04733			2.56801	0.17	2.16997	0.707372		33	2.99027	0.142691	3.00008	0.12697
		52.5	1.21	1.03819	1.0475	1.04113			2.6386	0.097	2.16446	0.703265		33.5	2.87993	0.122002	2.9219	0.118033
		53.75	1.2033	1.04066	1.0527	1.04274			2.70928	0.0734	2.16133	0.704197		34	2.89124	0.0922335	2.92867	0.120333
		55	1.2112	1.047	1.0492	1.03729			2.78005	0.0501	2.16073	0.703867		34.5	2.72379	0.108361	2.77368	0.109472
		56.25	1.213	1.04456	1.0494	1.04103			2.85087	0.0269	2.16276	0.703661		35	2.64223	0.091007	2.69758	0.117159
		57.5	1.2083	1.04723	1.0514	1.04107			2.92171	0.00386	2.16767	0.704418		35.5	2.61594	0.0870891	2.64685	0.108028
		58.75	1.2031	1.05516	1.0464	1.0427			2.99256	-0.0192	2.17591	0.707739		36	2.67237	0.0764093	2.71677	0.108884
		60	1.2086	1.06334	1.0488	1.04319			3.06338	0.0466	2.18777	0.706003		36.5	2.67259	0.0802197	2.707	0.10986
		61.25	1.2078	1.07046	1.0486	1.04448			3.13424	0.171	2.20085	0.70323		37	2.46774	0.0626772	2.5215	0.113655
		62.5	1.2106	1.08054	1.0474	1.04236			3.21956	0.315	2.20953	0.703507		37.5	2.44458	0.077712	2.43647	0.123641
		63.75	1.2151	1.07914	1.0489	1.04831			3.30548	0.45	2.20908	0.703494		38	2.40592	0.0150252	2.4967	0.105581
		65	1.22621	1.07707	1.0508	1.03765			3.37783	0.55	2.19352	0.705578		38.5	2.48425	0.00571993	2.49641	0.0739835
		66.25	1.2432	1.08034	1.0541	1.03097			3.48082	0.547	2.15932	0.70518		39	2.35911	-0.0165446	2.33072	0.058933
		67.5	1.2498	1.0955	1.0504	1.03914			3.55581	0.348	2.10808	0.699275		39.5	2.27751	-0.0159502	2.29989	0.104463
		68.75	1.2634	1.09829	1.0537	1.03757			3.63166	0.166	2.05193	0.697744		40	2.31396	-0.0648181	2.28762	0.0859272
		70	1.277	1.1041	1.0469	1.04123			3.70792	-0.0061	1.99944	0.699066		40.5	2.42412	-0.0257873	2.38169	0.0921861
		71.25	1.2775	1.10835	1.0473	1.03041			3.7841	-0.18	1.95891	0.707282		41	2.30919	-0.0190288	2.26701	0.109532
		72.5	1.2795	1.10884	1.0456	1.03325			3.84466	-0.326	1.93528	0.723384		41.5	2.29482	-0.0106602	2.19095	0.102248
		73.75	1.2882	1.10931	1.054	1.03308			3.91952	-0.451	1.92911	0.656289		42	2.21445	-0.00548363	2.13108	0.0924371
		75	1.3031	1.10959	1.0515	1.03487			3.97864	-0.31	1.93994	0.454261		42.5	2.39611	0.0246684	2.2931	0.0820434
		76.25	1.3095	1.11342	1.0489	1.04217			4.05197	-0.119	1.95814	0.490548		43	2.26422	0.0317752	2.16499	0.0921046
		77.5	1.3082	1.11178	1.0493	1.03718			4.12516	0.0774	1.97402	0.693338		43.5	2.14673	0.00418878	1.93511	0.118934
									4.21345	0.304	1.97599	0.709451		44	2.17949	-0.0152326	2.01174	0.103686
									4.288	0.471	1.95697	0.701882		44.5	2.19596	-0.0401955	2.0551	0.0695985
									4.3795	0.523	1.9205	0.696677		45	2.25145	-0.00893166	2.00043	0.0416364
									4.45767	0.393	1.874	0.69913		45.5	2.21446	-0.00730392	1.98843	-0.0249931
									4.53705	0.284	1.83392	0.704697		46	2.11062	0.029735	1.91543	-0.0574881
									4.61694	0.189	1.81455	0.703517		46.5	2.18405	0.0290056	1.91721	-0.137096
									4.69665	0.0998	1.82922	0.700992		47	2.06929	-0.0292341	1.82935	-0.239018
									4.77543	0.00898	1.87887	0.702278		47.5	2.12312	-0.00480135	1.86854	-0.302842
									4.85253	-0.125	1.94891	0.700729		48	2.04665	-0.034105	1.72271	-0.403853
									4.92755	-0.33	2.02531	0.710617		48.5	2.01202	-0.0738254	1.75894	-0.564602
									5.00052	-0.564	2.09551	0.682882		49	2.14374	-0.0551878	1.79112	-0.584841
									5.0716	-0.823	2.14661	0.504147		49.5	2.0084	0.0224282	1.66328	-0.56038
									5.12728	-1.04	2.16127	0.488866		50	2.0783	-0.00195985	1.77069	-0.66943
									5.1685	-1.2	2.13673	0.600929		50.5	2.07055	0.0633207	1.75958	-0.581445
									5.223	-1.4	2.08696	0.647917		51	2.10105	0.100808	1.82204	-0.498345
									5.27735	-1.34	2.03064	0.704177		51.5	2.11202	0.0912861	1.74258	-0.688918
									5.31827	-1.11	1.98067	0.710614		52	2.11666	0.0481026	1.81015	-0.935871
									5.37318	-0.815	1.94854	0.70434		52.5	2.19433	0.0480223	1.83265	-0.950571
									5.44247	-0.46	1.94345	0.685949		53	2.1381	0.0640267	1.85698	-1.01934
									5.49834	-0.19	1.96653	0.686625		53.5	2.11965	0.0630904	1.87123	-1.1832
									5.56851	0.136	2.01182	0.701535		54	2.14428	0.11272	1.86916	-1.07862
									5.65275	0.53	2.07004	0.708076		54.5	2.17532	0.175364	2.00619	-1.02391
									5.73669	0.591	2.12803	0.704438		55	2.25106	0.163587	2.15041	-1.16989
									5.82051	0.577	2.18168	0.681882		55.5	2.29546	0.12777	2.04733	-1.37513
									5.90457	0.554	2.23203	0.665244		56	2.33902	0.123211	2.26566	-1.41153
									5.98922	0.525	2.27892	0.672011		56.5	2.23752	0.127363	2.14927	-1.30719
									6.08915	0.483	2.32053	0.70328		57	2.25902	0.161047	2.1781	-1.17377
									6.17612	0.432	2.35527	0.71285		57.5	2.18319	0.214507	2.09617	-1.10879
									6.26435	0.384	2.38312	0.70551		58	2.19523	0.278456	2.14386	-1.09218
									6.33882	0.348	2.40358	0.704962		58.5	2.20789	0.342868	2.10512	-1.16974
									6.42924	0.308	2.41548	0.704523		59	2.19904	0.360903	2.10668	-1.27362
									6.52075	0.272	2.41989	0.704598		59.5	2.22416	0.328755	2.09833	-1.17957
									6.59776	0.247	2.41828	0.709516		60	2.19144	0.35529	2.0939	-1.36485
									6.69109	0.218	2.41105	0.705309		60.5	2.15966	0.358367	1.91784	-1.16668
									6.76966	0.195	2.40026	0.704912		61	2.16016	0.321547	2.16545	-1.18439
									6.84898	0.173	2.38713	0.705076		61.5	2.05427	0.33066	2.05358	-1.29416
									6.94517	0.147	2.37218	0.706012		62	2.18814	0.352553	1.9672	-1.18926
									7.02618	0.135	2.35711	0.705922		62.5	2.15561	0.343459	1.99937	-1.15647
									7.10794	0.153	2.34351	0.705373		63	2.20381	0.30792	2.07212	-1.16808
									7.19037	0.171	2.33151	0.707049		63.5	2.22931	0.349494	1.98592	-1.09947
									7.27337	0.19	2.32098	0.704382		64	2.24077	0.335585	2.01106	-1.10421
									7.35686	0.209	2.31171	0.704567		64.5	2.32163	0.343099	2.13157	-1.18065
									7.45758	0.232	2.30344	0.705833		65	2.3071	0.300472	2.23582	-1.09441
									7.54186	0.264	2.2941	0.703131		65.5	2.34346	0.308617	2.16531	-1.35423
									7.64333	0.327	2.28528	0.702908		66	2.34455	0.394367	2.31549	-1.41755
									7.74505	0.391	2.27457	0.703753		66.5	2.49508	0.421933	2.30117	-1.5702
									7.83	0.444	2.25982	0.703382		67	2.4137	0.389002	2.32192	-1.69856
									7.94921	0.516	2.23985	0.704143		67.5	2.39022	0.440301	2.29705	-1.5744
									8.05183	0.506	2.21348	0.701533		68	2.4326	0.439737	2.19802	-1.39015
									8.13771	0.386	2.18204	0.699321		68.5	2.44757	0.345689	2.36221	-1.33417
									8.24089	0.249	2.14743	0.698243		69	2.40279	0.309793	2.43037	-1.19075
									8.32666	0.138	2.11303	0.696841		69.5	2.38519	0.328884	2.26692	-1.08172
									8.41185	0.0252	2.07863	0.693436		70	2.35676	0.327094	2.23375	-1.39786
									8.49609	-0.0934	2.04386	0.698152		70.5	2.42105	0.351487	2.27002	-1.38329
									8.579	-0.137	2.00819	0.714338		71	2.35765	0.3355	2.26617	-1.3976
									8.64438	-0.127	1.96944	0.720995		71.5	2.35616	0.392428	2.24734	-1.49319
									8.72523	-0.111	1.93065	0.630574		72	2.24383	0.457682	2.1418	-1.64673
									8.8054	-0.0929	1.89377	0.431953		72.5	2.36772	0.475902	2.13258	-1.38628
									8.88523	-0.0727	1.86047	0.554536		73	2.32226	0.468482	2.30443	-1.39022
									8.96507	-0.0512	1.83255	0.710509		73.5	2.34474	0.483127	2.27761	-1.42946
									9.04525	-0.0546	1.81199	0.698044		74	2.45417	0.465657	2.34578	-1.34792
									9.12585	-0.0959	1.79968	0.695119		74.5	2.36598	0.456255	2.2864	-1.51494
									9.22284	-0.146	1.79423	0.698598		75	2.45617	0.462634	2.34922	-1.79847
									9.30366	-0.19	1.79357	0.696017
									9.38423	-0.236	1.79773	0.695277
									9.46438	-0.286	1.80491	0.710937
									9.54394	-0.245	1.81281	0.686836
									9.62302	-0.138	1.8191	0.473826
									9.71765	-0.00528	1.82308	0.51787
									9.79658	0.105	1.8245	0.714915
									9.87584	0.212	1.82453	0.704832
									9.97175	0.322	1.82034	0.69602
									10.0689	0.139	1.81574	0.696333
									10.1509	-0.0108	1.81581	0.692167
									10.2337	-0.153	1.82374	0.689217
									10.3172	-0.29	1.83988	0.70593
									10.3846	-0.396	1.86451	0.69071
									10.4694	-0.51	1.89411	0.476567
									10.5378	-0.336	1.92853	0.580791
									10.6237	-0.114	1.95855	0.717529
									10.7098	0.104	1.98667	0.705401
									10.8127	0.374	2.01194	0.697398
									10.8977	0.616	2.02994	0.697174
									11.0148	0.818	2.03412	0.698694
									11.1141	0.618	2.02562	0.700907
									11.2128	0.404	2.02009	0.700581
									11.2949	0.221	2.02307	0.700226
									11.3768	0.0381	2.03519	0.702092
									11.4586	-0.147	2.0555	0.701699
									11.5401	-0.0345	2.08163	0.702877
									11.6211	0.159	2.10092	0.70292
									11.717	0.411	2.10201	0.701568
									11.8108	0.699	2.07993	0.701118
									11.9175	1.09	2.02506	0.699006
									12.0362	0.636	1.92564	0.698292
									12.1093	0.124	1.81497	0.70075
									12.1817	-0.414	1.73326	0.697923
									12.2534	-0.979	1.69666	0.701588
									12.2961	-1.32	1.6996	0.708577
									12.353	-1.75	1.73375	0.70155
									12.4104	-1.72	1.79137	0.455805
									12.4542	-1.41	1.85521	0.456775
									12.514	-1.02	1.90908	0.568223
									12.5757	-0.678	1.94779	0.481118
									12.6552	-0.318	1.97637	0.664493
									12.7539	0.041	1.99999	0.717708
									12.8382	0.305	2.01538	0.697642
									12.9412	0.326	2.02266	0.69462
									13.028	0.306	2.03383	0.696995
									13.1325	0.293	2.05626	0.700088
									13.2192	0.29	2.09016	0.703774
									13.305	0.294	2.13195	0.70291
									13.3893	0.306	2.17756	0.697883
									13.4717	0.31	2.22253	0.695294
									13.5685	0.31	2.26122	0.700397
									13.6477	0.306	2.29287	0.704739
									13.7413	0.296	2.31901	0.703273
									13.8183	0.284	2.34169	0.701444
									13.9099	0.313	2.36397	0.701991
									13.9856	0.361	2.38625	0.700884
									14.0754	0.425	2.40833	0.702977
									14.164	0.496	2.42744	0.70094
									14.2514	0.574	2.43701	0.703755
									14.3374	0.413	2.43056	0.701033
									14.4227	-0.0172	2.41303	0.703947
									14.4936	-0.377	2.39713	0.706097
									14.5507	-0.65	2.38826	0.705281
									14.6084	-0.896	2.39082	0.705931
									14.6522	-1.05	2.40454	0.708984
									14.7119	-1.21	2.43004	0.711788
									14.7579	-1.02	2.46495	0.71217
									14.821	-0.644	2.5055	0.721943
									14.8694	-0.409	2.5412	0.725013
									14.9511	-0.0628	2.568	0.729891
									15.0332	0.273	2.58845	0.726599
									15.13	0.739	2.59745	0.722115
									15.2679	1.22	2.57128	0.713319
									15.3977	1.01	2.49013	0.705625
									15.5099	0.711	2.39468	0.70009
									15.5932	0.452	2.31803	0.695378
									15.6763	0.373	2.2708	0.689384
									15.7593	0.48	2.25156	0.686672
									15.8424	0.586	2.25034	0.683443
									15.9255	0.685	2.2566	0.681537
									16.0232	0.785	2.25828	0.680525
									16.1221	0.764	2.24615	0.675015
									16.2084	0.705	2.21737	0.672174
									16.3112	0.635	2.17242	0.663191
									16.3863	0.586	2.11177	0.645059
									16.4783	0.529	2.03552	0.612397
									16.5568	0.262	1.94618	0.586533
									16.6361	-0.0335	1.85186	0.580225
									16.6996	-0.271	1.76243	0.594412
									16.7624	-0.53	1.68548	0.635617
									16.8242	-0.826	1.62775	0.642956
									16.8846	-1.18	1.59654	0.620017
									16.9432	-1.59	1.59958	0.570996
									17.0004	-1.57	1.64169	0.531685
									17.0425	-1.39	1.71576	0.538902
									17.0981	-1.1	1.80906	0.589282
									17.1535	-0.793	1.90988	0.56603
									17.2227	-0.394	2.00447	0.555541
									17.2781	-0.075	2.07795	0.589315
									17.3472	0.323	2.12108	0.674238
									17.4303	0.358	2.12754	0.715957
									17.5133	0.17	2.10567	0.727435
									17.5825	0.0132	2.06969	0.727369
									17.6517	-0.143	2.03402	0.71932
									17.7071	-0.269	2.01151	0.711651
									17.7762	-0.425	2.00836	0.704958
									17.8316	-0.382	2.02455	0.705272
									17.9008	-0.258	2.05295	0.703668
									17.9701	-0.135	2.08676	0.700127
									18.0255	-0.0371	2.1168	0.700416
									18.0949	0.0854	2.13489	0.701539
									18.178	0.233	2.13656	0.698536
									18.2473	0.278	2.12449	0.698825
									18.3303	0.27	2.10316	0.698935
									18.3995	0.263	2.07945	0.700586
									18.4825	0.254	2.06094	0.697499
									18.5517	0.246	2.05373	0.698731
									18.621	0.235	2.06018	0.697473
									18.7042	0.135	2.07344	0.707629
									18.7736	0.0495	2.09001	0.712877
									18.843	-0.0357	2.10588	0.587086
									18.9124	-0.121	2.11675	0.482806
									18.9818	-0.207	2.11848	0.606522
									19.0372	-0.269	2.11138	0.722501
									19.1065	-0.15	2.10332	0.702148
									19.1757	-0.0236	2.09833	0.679996
									19.2449	0.103	2.09891	0.675106
									19.3142	0.229	2.10757	0.684869
									19.3973	0.379	2.12619	0.702562
									19.4667	0.47	2.15167	0.718073
									19.5502	0.422	2.17772	0.67815
									19.6342	0.374	2.20337	0.511873
									19.7187	0.326	2.2281	0.52569
									19.8038	0.279	2.25144	0.676628
									19.8751	0.243	2.27145	0.716417
									19.9613	0.281	2.28943	0.704434
									20.0337	0.315	2.30316	0.699578
									20.121	0.354	2.31204	0.697224
									20.2088	0.391	2.31454	0.699431
									20.2825	0.421	2.30859	0.696823
									20.3716	0.349	2.29291	0.698387
									20.4613	0.226	2.27058	0.699383
									20.5366	0.128	2.24467	0.703435
									20.6124	0.0326	2.21816	0.699687
									20.6886	-0.0599	2.19301	0.699325
									20.7651	-0.142	2.17122	0.700177
									20.842	0.0117	2.15318	0.699628
									20.9193	0.169	2.13552	0.69834
									20.9972	0.318	2.11693	0.697154
									21.0918	0.482	2.09603	0.696416
									21.172	0.599	2.06829	0.696427
									21.2703	0.564	2.03028	0.697532
									21.3711	0.265	1.98809	0.696325
									21.4561	0.0429	1.95498	0.691934
									21.5411	-0.178	1.93324	0.690945
									21.6253	-0.417	1.92448	0.707962
									21.6914	-0.637	1.92928	0.695906
									21.7721	-0.777	1.94581	0.401268
									21.8351	-0.656	1.96613	0.409586
									21.8972	-0.509	1.98315	0.704589
									21.974	-0.302	1.99658	0.69811
									22.0504	-0.0823	2.00856	0.689977
									22.127	0.138	2.01856	0.691435
									22.204	0.341	2.02609	0.693185
									22.2819	0.336	2.03198	0.695971
									22.3766	0.323	2.03676	0.69569
									22.4723	0.314	2.0418	0.694966
									22.5529	0.309	2.04402	0.695768
									22.6502	0.305	2.04428	0.69382
									22.7318	0.339	2.04033	0.696294
									22.8304	0.402	2.02886	0.699686
									22.9301	0.456	2.00711	0.684171
									23.0314	0.497	1.97406	0.635465
									23.1349	0.523	1.92966	0.642353
									23.2411	0.369	1.87547	0.693434
									23.3313	0.128	1.82102	0.69811
									23.4219	-0.101	1.7858	0.684799
									23.5116	-0.346	1.77827	0.689598
									23.582	-0.576	1.79475	0.682673
									23.6505	-0.855	1.83511	0.661843
									23.733	-1.17	1.89213	0.664272
									23.7809	-1.03	1.95537	0.415159
									23.8588	-0.722	2.00344	0.569031
									23.9204	-0.424	2.02448	0.698965
									23.9974	-0.0309	2.02408	0.697815
									24.075	0.346	2.00375	0.690242
									24.1703	0.726	1.96351	0.689761
									24.2694	0.526	1.90069	0.68906
									24.3545	0.326	1.83562	0.686819
									24.4411	0.156	1.78681	0.691428
									24.5281	-0.00348	1.7577	0.702929
									24.6143	-0.169	1.75126	0.594361
									24.6988	-0.351	1.77081	0.457971
									24.7808	-0.213	1.81745	0.697636
									24.8769	0.00301	1.88043	0.697437
									24.9562	0.192	1.94747	0.682993
									25.0518	0.401	2.00839	0.67607
									25.1496	0.559	2.05233	0.684868
									25.2687	0.481	2.06963	0.691968
									25.357	0.396	2.06404	0.693679
									25.4653	0.324	2.0424	0.690765
									25.5566	0.281	2.00979	0.691513
									25.6658	0.244	1.97229	0.69085
									25.7556	0.205	1.93299	0.69085
									25.8438	0.139	1.89995	0.692597
									25.9303	0.065	1.88033	0.691271
									26.032	-0.0329	1.88095	0.689794
									26.1151	-0.123	1.90299	0.691066
									26.1805	-0.201	1.93843	0.693567
									26.2609	-0.284	1.97915	0.672804
									26.3403	-0.336	2.01619	0.648403
									26.4034	-0.372	2.03821	0.681727
									26.4822	-0.406	2.03471	0.42536
									26.5456	-0.423	2.00639	0.437848
									26.6259	-0.432	1.96481	0.698315
									26.6914	-0.429	1.92535	0.703139
									26.7752	-0.291	1.89862	0.672943
									26.8612	-0.143	1.89546	0.682864
									26.9312	-0.037	1.92074	0.691611
									27.0197	0.087	1.9737	0.690668
									27.109	0.208	2.04241	0.689402
									27.2165	0.356	2.11229	0.693029
									27.3059	0.34	2.16932	0.692126
									27.4129	0.275	2.2059	0.693591
									27.5018	0.22	2.21924	0.694275
									27.6083	0.154	2.21181	0.694907
									27.6968	0.098	2.19343	0.694333
									27.785	0.0662	2.17553	0.694843
									27.8729	0.134	2.1665	0.692617
									27.9601	0.206	2.17084	0.690656
									28.0463	0.286	2.19243	0.691169
									28.1478	0.397	2.22885	0.703437
									28.2306	0.505	2.27244	0.711045
									28.3275	0.562	2.31175	0.611082
									28.4218	0.515	2.34055	0.499342
									28.5141	0.451	2.35711	0.539855
									28.6048	0.375	2.36053	0.707491
									28.6944	0.287	2.35239	0.703319
									28.783	0.243	2.3372	0.688799
									28.8562	0.247	2.31564	0.689378
									28.9434	0.252	2.2892	0.690349
									29.0156	0.255	2.25652	0.692652
									29.1017	0.258	2.21816	0.696007
									29.1731	0.259	2.17464	0.695289
									29.2583	0.223	2.12748	0.694011
									29.3291	0.191	2.08074	0.691479
									29.4138	0.15	2.03681	0.691035
									29.4842	0.116	1.99951	0.691366
									29.5545	0.0819	1.9722	0.691508
									29.6248	0.0103	1.95459	0.689812
									29.695	-0.116	1.94355	0.688162
									29.7653	-0.241	1.93725	0.681255
									29.8359	-0.362	1.93401	0.688469
									29.8926	-0.454	1.93028	0.711973
									29.964	-0.561	1.92465	0.625528
									30.0217	-0.628	1.91669	0.378182
									30.08	-0.515	1.91378	0.432655
									30.1537	-0.375	1.91841	0.70291
									30.2133	-0.272	1.92972	0.704025
									30.2883	-0.15	1.95053	0.693045
									30.3486	-0.0571	1.98037	0.692022
									30.4241	0.058	2.01812	0.692381
									30.4995	0.169	2.06209	0.694074
									30.5744	0.275	2.10972	0.69523
									30.6635	0.412	2.15738	0.69555
									30.7514	0.565	2.20266	0.694891
									30.8379	0.733	2.2394	0.694329
									30.9371	0.842	2.25984	0.693904
									31.0209	0.697	2.25733	0.693755
									31.1181	0.506	2.2389	0.697463
									31.2011	0.335	2.21266	0.696859
									31.2703	0.192	2.18393	0.697363
									31.3395	0.0969	2.15857	0.695155
									31.4225	0.218	2.13839	0.696475
									31.4917	0.318	2.11971	0.696421
									31.5748	0.436	2.1004	0.695001
									31.6443	0.531	2.07555	0.692829
									31.742	0.641	2.04077	0.692291
									31.8123	0.359	1.99433	0.695805
									31.8972	0.0212	1.94512	0.706793
									31.9539	-0.203	1.89774	0.695139
									32.0245	-0.489	1.856	0.552371
									32.0806	-0.729	1.82126	0.470959
									32.1364	-0.978	1.79438	0.613822
									32.1919	-1.04	1.77512	0.714054
									32.2473	-0.898	1.76313	0.564538
									32.3026	-0.75	1.75916	0.408133
									32.3581	-0.601	1.764	0.5682
									32.4277	-0.418	1.77767	0.713617
									32.4835	-0.275	1.79931	0.696063
									32.5535	-0.0994	1.82904	0.676543
									32.6236	0.0413	1.86474	0.680696
									32.6936	0.16	1.90347	0.68795
									32.7635	0.281	1.94299	0.694478
									32.8472	0.43	1.98047	0.696365
									32.9166	0.556	2.01193	0.694158
									33.0136	0.691	2.03208	0.695252
									33.0966	0.585	2.03805	0.693617
									33.1797	0.477	2.03422	0.694485
									33.2632	0.37	2.0261	0.695799
									33.333	0.282	2.0178	0.696921
									33.417	0.183	2.01483	0.694914
									33.4872	0.208	2.01909	0.697373
									33.5575	0.236	2.03086	0.699237
									33.6423	0.269	2.04599	0.697519
									33.7132	0.294	2.06039	0.69778
									33.7988	0.323	2.07066	0.696426
									33.8706	0.342	2.07298	0.695953
									33.9575	0.357	2.06357	0.696341
									34.0306	0.368	2.04256	0.695253
									34.1192	0.378	2.01055	0.693886
									34.1939	0.384	1.97159	0.69567
									34.2848	0.377	1.92635	0.695776
									34.3616	0.0758	1.88039	0.691405
									34.4386	-0.229	1.84641	0.688494
									34.4998	-0.488	1.83107	0.693517
									34.5601	-0.777	1.8338	0.71299
									34.6193	-1.11	1.84991	0.67315
									34.6773	-1.49	1.87414	0.405668
									34.7339	-1.88	1.90068	0.45873
									34.7757	-1.7	1.91736	0.718156
									34.8173	-1.45	1.92113	0.686155
									34.8726	-1.1	1.91757	0.674362
									34.9281	-0.734	1.91506	0.694809
									34.9838	-0.381	1.9194	0.69335
									35.0536	0.0509	1.93382	0.684704
									35.1235	0.484	1.95955	0.687742
									35.2207	0.608	1.98595	0.694144
									35.3038	0.538	2.00732	0.696895
									35.3868	0.465	2.02535	0.697093
									35.456	0.402	2.04087	0.694147
									35.5392	0.327	2.05583	0.696409
									35.6087	0.283	2.07165	0.700173
									35.6923	0.246	2.08687	0.697243
									35.7622	0.215	2.1014	0.699116
									35.8462	0.179	2.11308	0.696743
									35.9163	0.149	2.12036	0.696769
									35.9866	0.123	2.12223	0.695931
									36.057	0.199	2.11648	0.700493
									36.1418	0.292	2.0999	0.701408
									36.2127	0.365	2.07483	0.700981
									36.2985	0.446	2.04102	0.696463
									36.3853	0.517	2.00061	0.693348
									36.4585	0.431	1.95484	0.690778
									36.5476	0.236	1.91122	0.695408
									36.6223	0.0832	1.87801	0.711597
									36.6973	-0.0659	1.85869	0.69964
									36.7571	-0.187	1.8546	0.450746
									36.8315	-0.346	1.86871	0.462911
									36.8904	-0.328	1.90345	0.679161
									36.9635	-0.103	1.95353	0.710311
									37.051	0.173	2.01242	0.696323
									37.1244	0.393	2.07108	0.69174
									37.2136	0.623	2.12015	0.69418
									37.3209	0.755	2.14567	0.698164
									37.4166	0.566	2.14392	0.700224
									37.5155	0.419	2.12413	0.699067
									37.6168	0.303	2.09481	0.698085
									37.7024	0.221	2.0574	0.697902
									37.7884	0.147	2.01401	0.695522
									37.8743	0.0248	1.96541	0.694683
									37.9595	-0.115	1.91437	0.693928
									38.027	-0.234	1.86224	0.701499
									38.11	-0.4	1.81466	0.71536
									38.1751	-0.55	1.77557	0.512316
									38.239	-0.72	1.75258	0.384959
									38.3015	-0.896	1.75134	0.655458
									38.3779	-0.676	1.77606	0.71234
									38.4382	-0.453	1.82175	0.700759
									38.5131	-0.151	1.88465	0.695367
									38.5881	0.154	1.95572	0.698104
									38.679	0.495	2.02545	0.698811
									38.7719	0.705	2.07823	0.702447
									38.8678	0.545	2.10502	0.700776
									38.9664	0.416	2.11334	0.701604
									39.0672	0.31	2.11152	0.698222
									39.1525	0.235	2.10299	0.700302
									39.2385	0.167	2.09319	0.701592
									39.3248	0.204	2.0845	0.700805
									39.4285	0.28	2.07314	0.698387
									39.5148	0.345	2.05721	0.700667
									39.6184	0.423	2.03111	0.699802
									39.7219	0.502	1.99357	0.697511
									39.8253	0.413	1.94219	0.697758
									39.9115	0.203	1.88316	0.700414
									39.9973	-0.00771	1.83274	0.699556
									40.0821	-0.23	1.80342	0.69444
									40.149	-0.425	1.80052	0.682375
									40.2311	-0.697	1.82254	0.691823
									40.2955	-0.857	1.86508	0.724718
									40.3588	-0.749	1.92286	0.46407
									40.4215	-0.615	1.98329	0.407668
									40.4997	-0.427	2.03308	0.707319
									40.5626	-0.27	2.06428	0.712322
									40.6421	-0.0776	2.07966	0.687332
									40.7394	0.133	2.07929	0.690258
									40.8225	0.178	2.06391	0.696668
									40.9246	0.199	2.0387	0.699035
									41.011	0.22	2.01011	0.699838
									41.0981	0.244	1.9838	0.698062
									41.203	0.28	1.95866	0.700432
									41.2901	0.28	1.93325	0.699678
									41.3767	0.135	1.91064	0.700366
									41.4626	-0.0157	1.89832	0.699889
									41.5476	-0.173	1.90445	0.695466
									41.6317	-0.341	1.93389	0.695014
									41.6982	-0.484	1.98646	0.712418
									41.7805	-0.657	2.0592	0.485825
									41.8457	-0.488	2.14905	0.43143
									41.927	-0.243	2.24472	0.641705
									41.9922	-0.0448	2.32915	0.715626
									42.0909	0.24	2.3945	0.706041
									42.1744	0.452	2.43729	0.701104
									42.2772	0.65	2.45533	0.699174
									42.3834	0.532	2.44826	0.701582
									42.4922	0.448	2.43211	0.704322
									42.5837	0.402	2.42179	0.702537
									42.6748	0.374	2.42518	0.702841
									42.7823	0.361	2.43837	0.70353
									42.8693	0.371	2.45871	0.706113
									42.97	0.382	2.48041	0.705392
									43.0677	0.382	2.49981	0.705361
									43.1629	0.37	2.51356	0.705498
									43.2564	0.345	2.52059	0.705149
									43.3489	0.301	2.52186	0.705276
									43.4256	0.252	2.51916	0.70437
									43.517	0.192	2.51311	0.703558
									43.593	0.14	2.50626	0.705077
									43.6686	0.0872	2.49929	0.704352
									43.7441	0.0334	2.49397	0.704962
									43.8193	0.0965	2.4932	0.705079
									43.9091	0.211	2.49625	0.704966
									43.9834	0.313	2.50011	0.704713
									44.0716	0.445	2.50241	0.705146
									44.1585	0.589	2.49801	0.704887
									44.2443	0.621	2.48121	0.704784
									44.3431	0.504	2.45056	0.703549
									44.4271	0.392	2.41312	0.701176
									44.5107	0.275	2.37515	0.703241
									44.5802	0.174	2.34173	0.704872
									44.6497	0.183	2.31846	0.702973
									44.7329	0.394	2.30408	0.69453
									44.816	0.606	2.29382	0.693153
									44.9128	0.849	2.27911	0.696385
									45.0102	1.06	2.24866	0.701501
									45.1089	0.748	2.1934	0.706171
									45.195	0.35	2.13092	0.704962
									45.2674	0.041	2.07686	0.692631
									45.3399	-0.265	2.03276	0.692363
									45.3976	-0.521	1.99809	0.71158
									45.4548	-0.794	1.96971	0.690561
									45.5114	-0.832	1.94257	0.473033
									45.5675	-0.778	1.90727	0.466294
									45.6232	-0.717	1.86017	0.71213
									45.6926	-0.632	1.80771	0.704396
									45.748	-0.56	1.75791	0.697578
									45.8033	-0.485	1.71918	0.69941
									45.8725	-0.391	1.69787	0.700193
									45.9279	-0.505	1.7023	0.698788
									45.9973	-0.72	1.73329	0.693208
									46.0531	-0.881	1.7803	0.695391
									46.1093	-1.02	1.83207	0.598845
									46.1519	-1.12	1.87597	0.444129
									46.2094	-1.21	1.89993	0.492951
									46.2684	-1.26	1.89483	0.707126
									46.3291	-1.16	1.86546	0.705645
									46.392	-0.801	1.83067	0.702531
									46.4569	-0.511	1.80282	0.674868
									46.5397	-0.21	1.79113	0.677647
									46.6068	0.00826	1.7998	0.701463
									46.6906	0.284	1.83347	0.707452
									46.7892	0.672	1.88515	0.703182
									46.8844	0.658	1.93487	0.703124
									46.9765	0.502	1.97411	0.702883
									47.0518	0.341	2.0027	0.703716
									47.1412	0.126	2.02158	0.705113
									47.2154	-0.0609	2.02918	0.705904
									47.2747	-0.145	2.03015	0.703739
									47.3492	-0.00973	2.03151	0.701051
									47.4237	0.125	2.03485	0.701871
									47.5127	0.293	2.03947	0.702877
									47.5862	0.443	2.04499	0.708559
									47.6734	0.641	2.04907	0.713705
									47.7734	0.68	2.04611	0.693671
									47.8578	0.63	2.03406	0.63901
									47.9416	0.57	2.01589	0.613957
									48.0249	0.502	1.99412	0.632359
									48.108	0.431	1.97139	0.697665
									48.1772	0.207	1.95122	0.71301
									48.2602	-0.109	1.93759	0.698981
									48.3155	-0.32	1.93141	0.685889
									48.3847	-0.583	1.93259	0.684112
									48.4402	-0.788	1.93798	0.704472
									48.4958	-0.982	1.94499	0.614001
									48.5519	-1.04	1.95002	0.408978
									48.6085	-0.736	1.95411	0.486024
									48.6657	-0.457	1.96214	0.683318
									48.7234	-0.194	1.97873	0.714878
									48.7956	0.124	2.00504	0.707055
									48.8821	0.519	2.04153	0.702334
									48.9675	0.935	2.08312	0.702164
									49.0656	0.761	2.11765	0.706074
									49.1489	0.572	2.14364	0.708537
									49.232	0.373	2.166	0.708505
									49.3012	0.205	2.18759	0.705327
									49.3842	0.00932	2.20912	0.705905
									49.4534	0.0244	2.23018	0.706067
									49.5226	0.0457	2.24849	0.708498
									49.5917	0.0671	2.26422	0.709041
									49.6609	0.0884	2.27777	0.707355
									49.7301	0.11	2.28956	0.706546
									49.7993	0.131	2.30001	0.709373
									49.8823	0.163	2.30922	0.707714
									49.9516	0.189	2.31618	0.708309
									50.0209	0.215	2.32029	0.711299
									50.1042	0.246	2.31944	0.709718
									50.1737	0.27	2.31213	0.70858
									50.2573	0.265	2.29706	0.709384
									50.3272	0.233	2.27361	0.70603
									50.3972	0.201	2.24584	0.70363
									50.4814	0.163	2.21909	0.707592
									50.5518	0.132	2.20084	0.703395
									50.6222	0.102	2.19759	0.704883
									50.6927	0.195	2.21536	0.706112
									50.7776	0.338	2.2548	0.70445
									50.8631	0.47	2.31062	0.707198
									50.9497	0.586	2.36806	0.705213
									51.0526	0.689	2.41058	0.712145
									51.1586	0.508	2.42645	0.726731
									51.236	0.372	2.4156	0.697424
									51.3303	0.23	2.37941	0.489523
									51.4096	0.123	2.32319	0.442735
									51.4889	0.0186	2.25535	0.629695
									51.5521	-0.0464	2.18333	0.717058
									51.6305	-0.0555	2.11375	0.701698
									51.7085	-0.0644	2.052	0.70107
									51.7706	-0.0713	2.00126	0.704125
									51.8481	-0.0795	1.96519	0.703182
									51.9256	-0.087	1.94565	0.705895
									52.0033	-0.0866	1.94397	0.705678
									52.0812	0.109	1.96012	0.706161
									52.1755	0.341	1.98831	0.705534
									52.255	0.518	2.0171	0.706056
									52.3686	0.723	2.03126	0.704501
									52.486	0.837	2.01328	0.700889
									52.5909	0.363	1.95349	0.69783
									52.68	0.0195	1.8732	0.696787
									52.7511	-0.256	1.78934	0.704322
									52.8382	-0.657	1.71323	0.713537
									52.9055	-1.07	1.65179	0.621148
									52.9542	-1.46	1.61325	0.506777
									53.0165	-1.89	1.60537	0.488513
									53.0615	-1.68	1.63043	0.456914
									53.1202	-1.26	1.67523	0.626456
									53.1781	-0.762	1.72832	0.700994
									53.2502	-0.098	1.77808	0.700945
									53.3226	0.558	1.81883	0.699193
									53.4254	1.37	1.83071	0.697629
									53.5321	0.858	1.78842	0.70242
									53.6269	0.379	1.7259	0.701069
									53.7073	0.0331	1.6792	0.699093
									53.7877	-0.31	1.6636	0.70038
									53.8671	-0.693	1.68098	0.709275
									53.9292	-0.924	1.72913	0.694144
									53.99	-0.754	1.80216	0.44918
									54.0647	-0.496	1.87672	0.50985
									54.1386	-0.207	1.93111	0.715554
									54.2124	0.0916	1.95215	0.705878
									54.2864	0.382	1.94348	0.69723
									54.3762	0.607	1.90906	0.697285
									54.4525	0.421	1.856	0.699138
									54.5299	0.255	1.80678	0.703401
									54.6236	0.072	1.78214	0.701715
									54.7019	-0.0765	1.79154	0.69865
									54.7644	-0.198	1.82894	0.701821
									54.842	-0.318	1.88708	0.714743
									54.9186	-0.275	1.95705	0.501441
									54.9946	-0.227	2.02432	0.465695
									55.07	-0.176	2.07363	0.699252
									55.145	-0.122	2.09902	0.723036
									55.2198	-0.0658	2.10679	0.706547
									55.2795	-0.0201	2.10381	0.704632
									55.3541	0.0442	2.09801	0.705369
									55.4439	0.121	2.09609	0.702748
									55.5189	0.182	2.10446	0.70121
									55.5943	0.241	2.1265	0.703787
									55.6854	0.307	2.15785	0.714452
									55.7776	0.378	2.19635	0.712478
									55.8712	0.451	2.23779	0.650083
									55.9666	0.509	2.27792	0.622711
									56.0643	0.55	2.31325	0.660417
									56.1649	0.572	2.33983	0.713567
									56.269	0.5	2.35316	0.718998
									56.3585	0.397	2.35391	0.713379
									56.4496	0.317	2.34575	0.710673
									56.5416	0.251	2.32971	0.708862
									56.6337	0.195	2.30633	0.711454
									56.7249	0.145	2.27683	0.710364
									56.8145	0.115	2.24357	0.710274
									56.9024	0.0947	2.20797	0.708896
									56.9889	0.0709	2.17097	0.709776
									57.0916	0.0388	2.13288	0.710059
									57.1768	0.0104	2.0957	0.706862
									57.262	-0.018	2.06289	0.705041
									57.3478	0.0359	2.03958	0.706188
									57.4338	0.11	2.02778	0.705462
									57.5195	0.189	2.02815	0.704158
									57.6213	0.294	2.03995	0.702647
									57.7047	0.396	2.06456	0.702766
									57.8024	0.49	2.09516	0.705958
									57.8974	0.304	2.12067	0.722727
									57.9753	0.124	2.13745	0.702496
									58.0525	-0.0674	2.14551	0.461855
									58.1296	-0.258	2.14207	0.429073
									58.2073	-0.435	2.12464	0.705263
									58.2701	-0.493	2.09597	0.716233
									58.3498	-0.32	2.06898	0.703345
									58.4307	-0.164	2.04711	0.700877
									58.5121	-0.0182	2.03234	0.704919
									58.5938	0.126	2.02661	0.705387
									58.6752	0.275	2.03177	0.705271
									58.7719	0.424	2.04468	0.70835
									58.8672	0.492	2.06002	0.707535
									58.9612	0.563	2.07496	0.706795
									59.0539	0.635	2.087	0.708178
									59.1457	0.705	2.09366	0.708237
									59.2368	0.547	2.0926	0.707777
									59.3274	-0.0651	2.08853	0.70637
									59.3875	-0.486	2.08867	0.702752
									59.4472	-0.924	2.0936	0.702904
									59.5064	-1.37	2.09792	0.713986
									59.5508	-1.69	2.09443	0.707718
									59.5953	-1.96	2.07645	0.466967
									59.6557	-2.15	2.04886	0.451406
									59.7024	-1.66	2.03216	0.711094
									59.767	-1.07	2.03995	0.696124
									59.8343	-0.598	2.07375	0.701716
									59.9038	-0.216	2.1331	0.709377
									59.9926	0.2	2.21451	0.636852
									60.0824	0.606	2.30433	0.625306
									60.2073	0.996	2.37169	0.668047
									60.3304	0.782	2.39234	0.715274
									60.4522	0.559	2.38422	0.720078
									60.5383	0.4	2.36498	0.714905
									60.6401	0.205	2.34881	0.706696
									60.7231	0.0966	2.3436	0.702647
									60.8042	0.0819	2.35012	0.707709
									60.8839	0.0639	2.36407	0.70629
									60.9625	0.0433	2.38101	0.7109
									61.0405	0.0209	2.39649	0.710999
									61.1183	-0.00216	2.40619	0.706608
									61.1964	-0.0186	2.40908	0.707876
									61.2749	-0.0252	2.40815	0.710649
									61.3538	-0.0318	2.40633	0.711351
									61.4331	-0.0383	2.40653	0.710948
									61.4966	-0.0435	2.41114	0.71174
									61.5763	-0.0501	2.42311	0.711918
									61.6561	-0.0374	2.44531	0.711437
									61.7359	0.0532	2.47855	0.706728
									61.8154	0.146	2.52104	0.706169
									61.8944	0.245	2.57057	0.711262
									61.9725	0.353	2.62493	0.717417
									62.0647	0.498	2.68102	0.722352
									62.155	0.666	2.73264	0.66454
									62.2576	0.893	2.76968	0.590198
									62.3857	1.22	2.7739	0.582696
									62.5522	1.57	2.71035	0.620819
									62.7374	1.55	2.53813	0.64445
									62.8621	1.31	2.2839	0.658336
									62.947	1.12	1.9905	0.668653
									62.9828	1.08	1.38738	0.675755
