# Supplementary material for: Mechanical instability and interfacial energy drive biofilm morphogenesis
Source: eLife. 2019 Mar 8;8:e43920. doi: 10.7554/eLife.43920 (PMC6453567; doi:10.7554/eLife.43920)
Supplement: Source data 1. [file elife-43920-data1.xlsx]

## Sheet: Table 2
		Table 3
Description		Experiment data for testing the mechanical instability theory. For each agar concentration, data are averaged over three copies.
Condition
Computed/Measured quantity
		Gs (Agar substrate shear modulus) (kPa)
		Sample ID\Agar Conc.	0.004	0.005	0.006	0.007	0.008	0.01	0.015	0.03
		1	0.137063	0.381645	0.4405	1.15958	1.832	4.858	12.373	63.6231
		2	0.131715	0.31935	0.592	1.564	2.108	3.818	11.031	78.8769
		3	0.148583	0.296	0.49815	1.33533	1.834	2.627	11.89	59.2643
		Mean	0.13912	0.332332	0.510217	1.35297	1.92467	3.76767	11.7647	67.2548
		std	0.00862038	0.0442738	0.0764674	0.202785	0.158774	1.11635	0.679722	10.2983
		Gf (Biofilm shear modulus) (kPa)
		Sample ID\Agar Conc.	0.004	0.005	0.006	0.007	0.008	0.01	0.015	0.03
		1	0.984011	1.34896	1.06906	1.8197	1.18032	1.2218	1.38357	2.48886
		2	0.781628	0.986279	1.20504	1.49968	1.30317	1.08893	1.40605	2.36592
		3	0.737904	1.00925	1.0617	1.28529	1.00462	1.04713	1.33968	2.42103
		Mean	0.834514	1.11483	1.11193	1.53489	1.1627	1.11929	1.37643	2.42527
		std	0.131301	0.203089	0.0807169	0.268941	0.150053	0.0912065	0.033756	0.0615784
		h (Biofilm total thickness) (μm)
		Sample ID\Agar Conc.	0.004	0.005	0.006	0.007	0.008	0.01	0.015	0.03
		1	56.126	63.6667	70.0333	67.8542	69.1	103.9	108.617	120.546
		2	54.238	56	63.85	69.803	64.5	88.3167	116.767	115.57
		3	60.9085	58.8333	57.2667	67.771	76.7333	95.9667	128.833	118.608
		Mean	57.0908	59.5	63.7167	68.4761	70.1111	96.0611	118.072	118.241
		std	3.43832	3.87657	6.38438	1.1499	6.17903	7.7921	10.1714	2.50795
		hd (Debris layer thickness) (μm)
		Sample ID\Agar Conc.	0.004	0.005	0.006	0.007	0.008	0.01	0.015	0.03
		1	2.87	2.01333	5.34	8.45667	11.9333	40.5333	47.8333	55.3667
		2	1.10933	1.37933	7.45333	7.06667	9.19	24.4667	47.8333	42.4333
		3	2.404	1.98333	4.66	7.46667	10.93	24.9333	47.4	46.2333
		Mean	2.12778	1.792	5.81778	7.66333	10.6844	29.9778	47.6889	48.0111
		std	0.912256	0.357694	1.45667	0.715565	1.38805	9.14435	0.250183	6.64742
		λ (Biofilm surface pattern wavelength) (μm)
		Sample ID\Agar Conc.	0.004	0.005	0.006	0.007	0.008	0.01	0.015	0.03
		1	500.612	452.335	410.854	402.304	389.731	325.1	335	288.596
		2	518.514	452.637	411.535	362.459	385.213	309.7	276.7	268.319
		3	498.572	431.033	445.185	376.822	365.032	291.2	313.3	279.803
		Mean	505.899	445.335	422.525	380.529	379.992	308.667	308.333	278.906
		std	10.9724	12.3869	19.6271	20.1796	13.1513	16.9736	29.4656	10.1678
